# Supplementary material for: Host–Pathogen Coevolution: The Selective Advantage of Bacillus thuringiensis Virulence and Its Cry Toxin Genes
Source: PLoS Biol. 2015 Jun 4;13(6):e1002169. doi: 10.1371/journal.pbio.1002169 (PMC4456383; doi:10.1371/journal.pbio.1002169)
Supplement: S3 Data — A summary of the results is shown in Fig 3, and the statistical results are given in S10 Table. (XLSX) [file pbio.1002169.s003.xlsx]

## Sheet: Data for Fig. 3
Treatment	Transfer	Replicate population	Relative frequency of B. thuringiensis strain genotypes
			BT-679	BT-246	BT-247	BT-22	BT-50
Coevolution	12	1	0.932126	0.0136654	0.0324532	0	0.0217556
Coevolution	12	2	0.927066	0.0207381	0.0314982	0	0.0206978
Coevolution	12	3	0.953433	0.0145552	0.0203599	0	0.0116514
Coevolution	12	4	0.952093	0.0139557	0.021209	0	0.012742
Coevolution	12	5	0.03672	0.0143476	0.0184666	0.904235	0.0262305
Coevolution	12	6	0.942803	0.014941	0.0306323	0	0.011624
Coevolution	12	7	0.953239	0.0133145	0.019941	0	0.0135052
Coevolution	12	8	0.953307	0.0152086	0.0205806	0	0.010904
Coevolution	12	9	0.956292	0.0150531	0.0158021	0.000627157	0.0122252
Coevolution	12	10	0.952451	0.0106526	0.0226624	0.000887086	0.0133468
Coevolution	20	1	0.936099	0.0169888	0.0269963	0	0.0199155
Coevolution	20	2	0.923907	0.0151231	0.0205474	0	0.0404225
Coevolution	20	3	0.922388	0.0180628	0.0362465	0	0.0233023
Coevolution	20	4	0.942162	0.0142743	0.0253304	0	0.0182331
Coevolution	20	5	0.942178	0.0147149	0.0213434	0	0.0217633
Coevolution	20	6	0.95298	0.0132579	0.0179109	0	0.0158517
Coevolution	20	7	0.941996	0.0140218	0.0242903	0.000236694	0.0194551
Coevolution	20	8	0.941412	0.0137519	0.0219208	0.000820357	0.022095
Coevolution	20	9	0.934829	0.0151785	0.0267259	0.00629863	0.0169684
Coevolution	20	10	0.937665	0.011646	0.0209578	4.13328e-06	0.0297275
Control	12	1	0.0201958	0.0228424	0.0187709	0.667521	0.27067
Control	12	2	0.0107627	0.0167031	0.028759	0.910139	0.0336362
Control	12	3	0.0150584	0.0236269	0.0305767	0.839933	0.0908054
Control	12	4	0.0103143	0.0195136	0.0438228	0.722918	0.203431
Control	12	5	0.014523	0.0224052	0.0456457	0.354047	0.563379
Control	12	6	0.0137851	0.0326045	0.0318765	0.401344	0.52039
Control	12	7	0.0103551	0.0189975	0.0311107	0.61933	0.320207
Control	12	8	0.0138854	0.0232761	0.0198345	0.915897	0.0271068
Control	12	9	0.0112266	0.0167963	0.019295	0.87845	0.074232
Control	12	10	0.010206	0.0169142	0.0297112	0.7892	0.153968
Control	20	1	0.0134233	0.0246826	0.0187655	0.928696	0.0144322
Control	20	2	0.0124789	0.0143638	0.0124026	0.946736	0.0140188
Control	20	3	0.0113959	0.0154185	0.0141471	0.946265	0.0127739
Control	20	4	0.0153445	0.0131453	0.0226503	0.933718	0.0151417
Control	20	5	0.0146085	0.0162857	0.0158009	0.93866	0.0146447
Control	20	6	0.0148706	0.0203256	0.0164679	0.932159	0.0161769
Control	20	7	0.0155658	0.0184454	0.02077	0.931282	0.0139363
Control	20	9	0.0140916	0.0164348	0.0160257	0.925454	0.0279943
Control	20	10	0.0126824	0.0153791	0.0181405	0.93694	0.0168582
1-sided Adaptation	12	1	0.0123089	0.015168	0.0308594	0.915669	0.0259949
1-sided Adaptation	12	2	0.946458	0.0157771	0.02544	0	0.0123246
1-sided Adaptation	12	3	0.951019	0.0138574	0.0204866	0	0.0146372
1-sided Adaptation	12	4	0.94826	0.0149158	0.0263949	0	0.0104292
1-sided Adaptation	12	5	0.0119188	0.0139321	0.0313088	0.926046	0.0167938
1-sided Adaptation	12	6	0.953203	0.0136015	0.0196734	0	0.0135219
1-sided Adaptation	12	7	0.0163946	0.0155195	0.0328228	0.729088	0.206175
1-sided Adaptation	12	8	0.0158401	0.018749	0.0251905	0.575209	0.365011
1-sided Adaptation	12	9	0.0130085	0.0262245	0.0217866	0.00569601	0.933284
1-sided Adaptation	12	10	0.0141419	0.0327129	0.0201306	0	0.933015
1-sided Adaptation	20	2	0.0122442	0.0141376	0.0179553	0.938716	0.0169466
1-sided Adaptation	20	3	0.964105	0.0113532	0.0133051	0	0.0112364
1-sided Adaptation	20	4	0.963324	0.0100253	0.00417752	0.0012757	0.0211975
1-sided Adaptation	20	6	0.957747	0.012488	0.014908	0.000369138	0.0144883
1-sided Adaptation	20	9	0.958038	0.0126672	0.0149728	0.000452816	0.0138692
1-sided Adaptation	20	10	0.0112535	0.0146538	0.0132588	0.000704816	0.960129
Starting Population	0	1	0.0352675	0.464428	0.348877	0.0439755	0.107452
Starting Population	0	2	0.0499174	0.399212	0.370126	0.0424016	0.138343
Starting Population	0	3	0.0170797	0.430716	0.387533	0.0405953	0.124077
