# Supplementary material for: Host–Pathogen Coevolution: The Selective Advantage of Bacillus thuringiensis Virulence and Its Cry Toxin Genes
Source: PLoS Biol. 2015 Jun 4;13(6):e1002169. doi: 10.1371/journal.pbio.1002169 (PMC4456383; doi:10.1371/journal.pbio.1002169)
Supplement: S5 Data — The results are summarized in Fig 5, and the statistical findings are shown in S14–S21 Tables. (XLSX) [file pbio.1002169.s005.xlsx]

## Sheet: Data for Fig. 5c
Treatment	Transfer	Replicate population	Killing (%)	Deletion frequency	Plasmid copy number
Coevolution	12	1	60.4651	0	2.13278
Coevolution	12	2	94	0	1.96174
Coevolution	12	3	85	0	3.97143
Coevolution	12	4	62.7907	0	2.87367
Coevolution	12	5	77.1429	0.0118919	1.84859
Coevolution	12	6	76.5957	0	2.64602
Coevolution	12	7	87.5	0	2.74045
Coevolution	12	8	86	0	2.3652
Coevolution	12	9	96.1538	0	2.80783
Coevolution	12	10	81.6327	0	3.00885
Coevolution	20	1	47.3684	0.356091	1.06393
Coevolution	20	2	78.3784	0	3.40413
Coevolution	20	3	92.3077	0	2.60969
Coevolution	20	4	87.8049	0	2.82944
Coevolution	20	5	41.3043	0.668874	0.385965
Coevolution	20	6	83.7838	0	1.80192
Coevolution	20	7	60.7143	0	3.49836
Coevolution	20	8	95.7447	0	1.52739
Coevolution	20	9	92.6829	0	3.38936
Coevolution	20	10	95.6522	0	2.24859
Adaptation	12	2	85.3659	0	2.42042
Adaptation	12	3	78.0488	0	3.08286
Adaptation	12	4	82.6087	0	2.87048
Adaptation	12	6	97.9592	0	2.59108
Adaptation	20	3	72.8355	0	2.30444
Adaptation	20	4	97.3684	0	2.03744
Adaptation	20	6	NA	0.445328	0.848972
Adaptation	20	9	92	0	3.3659

## Sheet: Plasmid annotation - Fig. 5d 
Annotation for Plasmid Bti_GWDALJX04I0LJH_51-405_fm319
Population genetics data is available in S19 Table and S20 Table
StartPosition	End Position	Annotation
544	795	hypothetical_protein
811	1242	Transposase_and_inactivated_derivatives
2379	2939	Site-specific_recombinase_XerD
3839	4024	hypothetical_protein
4136	4525	hypothetical_protein
4571	4996	Transposase_DDE_domain_
5639	6115	hypothetical_protein
6161	6661	hypothetical_protein
7773	8000	hypothetical_protein
8082	8894	Transposase_and_inactivated_derivatives
8936	9205	Transposase_and_inactivated_derivatives
9189	9737	Transposase_and_inactivated_derivatives
9961	10302	alkylphosphonate_utilization_operon_protein_PhnA
11599	12171	Predicted_secreted_acid_phosphatase
12826	13311	hypothetical_protein
13780	14391	hypothetical_protein
14563	14934	hypothetical_protein
15379	15552	hypothetical_protein
16279	16470	hypothetical_protein
16761	17402	Site-specific_recombinases,_DNA_invertase_Pin_homologs
17801	18010	hypothetical_protein
18043	19005	Site-specific_recombinase_XerD
19379	20308	conserved_hypothetical_protein_(putative_transposase_or_invertase)
20666	20974	hypothetical_protein
21045	21302	Predicted_transcriptional_regulators
21477	21752	Bacterial_nucleoid_DNA-binding_protein
21816	22049	RNA_chaperone_Hfq
22712	22873	hypothetical_protein
23104	23526	hypothetical_protein
24116	25345	Transposase_and_inactivated_derivatives
25941	26114	hypothetical_protein
26487	26891	hypothetical_protein
26934	27440	hypothetical_protein
27995	28264	hypothetical_protein
28331	28510	hypothetical_protein
28591	28737	hypothetical_protein
29065	29193	hypothetical_protein
29241	30137	conserved_hypothetical_protein_(putative_transposase_or_invertase)
30794	30907	hypothetical_protein
30943	31152	hypothetical_protein
31950	32270	hypothetical_protein
32288	32656	hypothetical_protein
33127	34362	Membrane_proteins_related_to_metalloendopeptidases
34615	35124	hypothetical_protein
35223	35492	Transposase_and_inactivated_derivatives
35534	36346	Transposase_and_inactivated_derivatives
37357	37905	Transposase_and_inactivated_derivatives
38122	38220	hypothetical_protein
39223	40212	Clostridium_epsilon_toxin_ETX/Bacillus_mosquitocidal_toxin_MTX2_
40356	41042	Transposase_and_inactivated_derivatives
41055	41357	hypothetical_protein
41379	42278	Bacillus_haemolytic_enterotoxin_(HBL)_
42374	43501	Bacillus_haemolytic_enterotoxin_(HBL)_
43722	44954	Predicted_membrane_protein
45001	46305	Bacillus_haemolytic_enterotoxin_(HBL)_
47454	48005	Transposase_and_inactivated_derivatives
48797	49078	looped-hinge_helix_DNA_binding_domain,_AbrB_family
49100	49333	RNA_chaperone_Hfq
49554	49664	Bacterial_nucleoid_DNA-binding_protein
49815	50105	Predicted_transcriptional_regulators
50175	50483	hypothetical_protein
50819	51700	conserved_hypothetical_protein_(putative_transposase_or_invertase)
51810	52496	Transposase_and_inactivated_derivatives
52712	53851	germination_protein,_Ger(x)C_family
53948	55042	Spore_germination_protein_
55163	55747	hypothetical_protein
56303	56728	hypothetical_protein
56987	59707	Collagenase_/Peptidase_family_M9_N-terminal_
60318	60509	hypothetical_protein
60647	60856	Alkaline_phosphatase
60904	61173	Alkaline_phosphatase
61473	61673	hypothetical_protein
61806	62498	Transposase_and_inactivated_derivatives
62737	62940	Predicted_transcriptional_regulators
63132	63626	Predicted_transcriptional_regulators
63984	65213	hypothetical_protein
65861	66370	hypothetical_protein
66349	66801	hypothetical_protein
66974	68137	hypothetical_protein
68193	68636	hypothetical_protein
68651	68803	hypothetical_protein
68952	69098	hypothetical_protein
69095	70189	hypothetical_protein
70380	70643	hypothetical_protein
70658	71164	hypothetical_protein
71236	72438	hypothetical_protein
72702	73412	hypothetical_protein
73429	74748	Relaxase/Mobilisation_nuclease_domain_
74835	75035	hypothetical_protein
75173	75469	hypothetical_protein
75471	75656	hypothetical_protein
75758	76939	DNA_segregation_ATPase_FtsK/SpoIIIE_and_related_proteins
76878	77495	hypothetical_protein
77523	77756	Predicted_transcriptional_regulator_with_C-terminal_CBS_domains
78628	78846	hypothetical_protein
78859	79044	hypothetical_protein
79082	79252	hypothetical_protein
79464	80354	Site-specific_recombinase_XerD
80414	81781	hypothetical_protein
82187	83449	Transposase_and_inactivated_derivatives,_TnpA_family
83450	83944	hypothetical_protein
84433	85023	Site-specific_recombinases,_DNA_invertase_Pin_homologs
85207	85329	hypothetical_protein
85546	85755	hypothetical_protein
85804	86766	Site-specific_recombinase_XerD
87145	88074	conserved_hypothetical_protein_(putative_transposase_or_invertase)
88514	88822	hypothetical_protein
88892	89182	Predicted_transcriptional_regulators
89297	89575	Bacterial_nucleoid_DNA-binding_protein
89628	89861	RNA_chaperone_Hfq
90011	90163	looped-hinge_helix_DNA_binding_domain,_AbrB_family
90855	91304	Transposase_and_inactivated_derivatives
91448	92173	Predicted_thioesterase_involved_in_non-ribosomal_peptide_biosynthesis
92160	92786	phosphopantetheine--protein_transferase_domain
93228	108113	non-ribosomal_peptide_synthase_domain_TIGR01720/amino_acid_adenylation_domain
108110	114583	amino_acid_adenylation_domain
114586	119142	non-ribosomal_peptide_synthase_domain_TIGR01720/amino_acid_adenylation_domain
119157	120410	Arabinose_efflux_permease
121073	122326	Putative_transposase_
122595	123035	hypothetical_protein
123571	124263	Transposase_and_inactivated_derivatives
124290	124895	hypothetical_protein
125299	125745	Predicted_transcriptional_regulators
