# Supplementary material for: Host–Pathogen Coevolution: The Selective Advantage of Bacillus thuringiensis Virulence and Its Cry Toxin Genes
Source: PLoS Biol. 2015 Jun 4;13(6):e1002169. doi: 10.1371/journal.pbio.1002169 (PMC4456383; doi:10.1371/journal.pbio.1002169)
Supplement: S7 Data — The results are shown in S3 Fig. (XLSX) [file pbio.1002169.s007.xlsx]

## Sheet: Data for S3 Fig
Read number mapped with different mapping software
Software	Singletons	Properly Paired	Not Properly Paired	Unmapped Reads	Total Simulated Read	Read mapped	Itself and Mate mapped	% Genome Covered	AverageCoverage (expected = 3)	Variance Coverage	Speed
BOWTIE	0	5546	0	159454	165000	5546	5546	0.1166	2.04	27.61	Fastest
SOAP	10048	37770	0	117182	165000	47818	47818	0.2731	0.91	11.62	Slow
BWA	746	81280	102	82872	165000	82128	81382	0.6895	1.56	5.13	Fast
MOSAIK	18941	105388	2386	38285	165000	126715	107774	0.884	2.91	19.64	Slow
GSNAP	18807	108992	30	37171	165000	127829	109022	0.8903	2.81	19.43	Medium
