# Supplementary material for: Host–Pathogen Coevolution: The Selective Advantage of Bacillus thuringiensis Virulence and Its Cry Toxin Genes
Source: PLoS Biol. 2015 Jun 4;13(6):e1002169. doi: 10.1371/journal.pbio.1002169 (PMC4456383; doi:10.1371/journal.pbio.1002169)
Supplement: S15 Table — Table is presented as an Excel file. (XLSX) [file pbio.1002169.s029.xlsx]

## Sheet: SV_Pindel Data + Analysis
						Transfer 12														Transfer 20														Uncorrected p-values					FDR corrected p-values (q-values)
						Coevolution replicate populations										One-sided adaptation replicate populations				Coevolution replicate populations										One-sided adaptation replicate populations				Linear Regression Analysis		ANOVA AlleleFrequency~Generation+Treatment[Replicate]+Generation*Treatment[Replicate]			Linear Regression Analysis		ANOVA AlleleFrequency~Generation+Treatment[Replicate]+Generation*Treatment[Replicate]
ContigNumber	ContigName	Position	VariationType	Reference sequence	Variant sequence	1	2	3*	4	5	6	7	8	9	10	2	3	4	6	1	2	3	4	5	6	7	8	9	10	3	4	6	9	Killing Ability	Infection Load	Transfer	Treatment	Treatment*Transfer	Killing Ability	Infection Load	Transfer	Treatment	Treatment*Transfer
2513020848	Bti_contig00111_ace.1	28462	DEL	CT	C	0.950413	0.943089	1	0.908046	0.851064	0.905109	0.901042	0.885932	0.911504	0.877378	0.935345	0.902965	0.864078	0.898305	0.937349	0.895928	0.904573	0.895288	0.935323	0.918367	0.922449	0.890339	0.911927	0.889764	0.890909	0.892857	0.898089	0.912281	0.0589501	0.102269	0.925061	0.180229	0.205406	0.936952	0.93462	0.94261	0.689865	0.996797
2513020848	Bti_contig00111_ace.1	36947	RPL	TTAGCAAACTATTTTTTCT	TAGCAAACTATTTTTTC,T..C,TAGCAAACTATTTTGTC	1	0	0	0	0	1	1	1	1	1	0.967532	1	1	1	1	1	1	0	0	0	1	0	1	1	1	0	1	0.98	0.847613	0.867796	0.77276	0.292316	0.592022	0.953572	0.94571	0.854582	0.858679	0.996797
2513020848	Bti_contig00111_ace.1	65894	RPL	GTCTACTCTTTATTGTATTTCTTTCTTGCAAAATTTC	GCTTCTCTTTATTGTATTT..TTCTTTTTTGCAAAATTTC	0	0	0	0.0223881	0	0	0.0267966	0	0	0	0	0	0	0	0	0.0506912	0	0	0	0	0.0263158	0	0.0331588	0.032967	0	0	0.0243902	0.0416667	0.723309	0.100967	0.298636	0.414205	0.59189	0.951052	0.93462	0.465922	0.908958	0.996797
2513020848	Bti_contig00111_ace.1	65894	DEL	GT	G	1	0.99373	1	1	1	1	1	1	1	1	1	1	1	1	1	1	1	1	1	1	1	1	1	0.996183	1	1	1	1	0.209903	0.862832	0.598743	0.68983	0.155636	0.936952	0.94322	0.719273	0.908958	0.996797
2513020848	Bti_contig00111_ace.1	100998	DEL	TA	T	0	0	0	0	0	0	0	0	0	0	0	0	0	0	0	0	0	0	0	0	0	0	0	0	0	0	0	0	NA	NA	0.53898	0.287436	0.562269	NA	NA	0.671048	0.858679	0.996797
2513020848	Bti_contig00111_ace.1	101005	RPL	AAGCCCCCTCTTCTAACTTTCTAGA	AGCCCCCTCTTCTAACTTT..CACCTCTTCTAACTTTCAG	0	0	0	0	0	0	0	0	0	0	0	0	0	0	0	1	1	0	0	0	0	0	0	0	0	0	1	1	0.43804	0.995667	0.373083	0.203703	0.538499	0.936952	0.995667	0.5455	0.736463	0.996797
2513020848	Bti_contig00111_ace.1	107984	DEL	CA	C	0.935897	0.933333	1	0.989071	1	0.965318	0.934109	0.923304	0.929648	0.939286	0.923218	0.945578	0.948478	0.957041	0.949686	0.955102	0.911414	0.945274	0.908142	0.953871	0.941075	0.918455	0.946218	0.934142	0.931429	0.964467	0.951613	0.932981	0.716457	0.647381	0.11179	0.982653	0.968172	0.951052	0.93462	0.402405	0.987908	0.996797
2513020848	Bti_contig00111_ace.1	138983	INS	A	AT	0.938144	0.920973	1	0.91129	0.854167	0.906849	0.908738	0.957295	0.938005	0.897436	0.905018	0.932401	0.904206	0.900844	0.888383	0.883002	0.909091	0.918919	0.893617	0.921329	0.91018	0.915633	0.913738	0.884488	0.923913	0.879487	0.914179	0.914687	0.601747	0.176427	0.853608	0.587071	0.737531	0.951052	0.93462	0.89403	0.908958	0.996797
2513020848	Bti_contig00111_ace.1	151093	DEL	CA	C	0.874587	0.921429	1	0.964179	0.917722	0.874214	0.922892	0.928058	0.901734	0.881041	0.882812	0.885057	0.916049	0.905263	0.908297	0.907285	0.952096	0.930108	0.895216	0.911715	0.953654	0.900398	0.921233	0.925	0.922619	0.945122	0.913272	0.943277	0.478552	0.573451	0.0350403	0.748637	0.541216	0.936952	0.93462	0.190944	0.908958	0.996797
2513020848	Bti_contig00111_ace.1	194297	INS	A	AC	0.0211268	0.0252101	0	0	0.0677083	0.0191083	0	0.0390625	0.0152439	0.0159453	0.0100806	0.00797872	0.015	0.0127551	0.0131148	0.0127796	0.0153061	0	0.0176056	0.026694	0.0190736	0.0220588	0.0112045	0.0235988	0.0280374	0	0.0140845	0.00894855	0.741495	0.968076	0.572771	0.434174	0.653768	0.951052	0.990589	0.70175	0.908958	0.996797
2513020848	Bti_contig00111_ace.1	262767	DEL	TA	T	0.871795	0.854962	1	0.872204	0.949367	0.963636	0.891192	0.824561	0.879121	0.841584	0.880531	0.861183	0.850374	0.926346	0.892351	0.876712	0.866142	0.89881	0.83908	0.893333	0.824092	0.922481	0.884112	0.877378	0.940075	0.877023	0.899593	0.887417	0.381628	0.376034	0.59435	0.809604	0.932034	0.936952	0.93462	0.718571	0.908958	0.996797
2513020848	Bti_contig00111_ace.1	281519	DEL	CGGACCTTCTGGCGGGCCTCCT	C	0.210909	NA	NA	NA	NA	NA	NA	NA	NA	NA	0.260579	0.266504	NA	0.212963	NA	NA	NA	NA	NA	NA	NA	0.30854	NA	NA	0.35461	NA	0.343333	0.315508	0.805284	0.686299	0.00693675	0.127603	0.0970283	0.951052	0.93462	0.114847	0.623885	0.92644
2513020848	Bti_contig00111_ace.1	285069	DEL	CA	C	0.884774	0.914397	1	0.885463	0.903743	0.80137	0.831325	0.774359	0.836431	0.83662	0.8659	0.877551	0.879093	0.824121	0.868235	0.883871	0.840777	0.846154	0.887531	0.840445	0.892925	0.878924	0.917219	0.887814	0.885886	0.887789	0.895833	0.908004	0.451424	0.930192	0.0259413	0.531628	0.0377144	0.936952	0.977792	0.15893	0.908958	0.751348
2513020848	Bti_contig00111_ace.1	286215	INS	C	CT	0.988827	0.976378	1	0.983264	0.972851	0.989247	0.980057	0.988806	0.9875	0.991525	0.979351	0.982014	0.984252	0.968966	0.985965	0.989547	0.985366	0.9875	0.980328	0.992462	0.981333	0.990654	0.994638	0.989924	0.990431	1	0.985743	0.984615	0.535553	0.363085	0.00660069	0.178557	0.264785	0.951052	0.93462	0.114847	0.689865	0.996797
2513020848	Bti_contig00111_ace.1	290191	DEL	AT	A	1	1	1	1	1	1	1	1	1	1	1	1	1	1	1	1	1	1	1	1	1	1	1	0.995249	1	1	1	1	0.338768	0.727688	0.42324	0.319191	0.519148	0.936952	0.93462	0.570388	0.889006	0.996797
2513020848	Bti_contig00111_ace.1	348502	INS	C	CA	0.84375	0.885387	0.47619	0.920139	0.987055	0.91989	0.903158	0.876506	0.892655	0.84991	0.864035	0.883249	0.913838	0.874687	0.863229	0.859275	0.896552	0.869452	0.826464	0.854167	0.857955	0.817978	0.867314	0.897751	0.912023	0.858667	0.891377	0.915996	0.494311	0.400699	0.0956453	0.588853	0.342127	0.947534	0.93462	0.374966	0.908958	0.996797
2513020848	Bti_contig00111_ace.1	499446	INS	A	AT	0.955157	0.927215	1	0.927318	0.930796	0.902235	0.896552	0.932692	0.955836	0.962617	0.939904	0.939683	0.946927	0.928367	0.983957	0.923241	0.939453	0.935096	0.937186	0.948276	0.933333	0.945205	0.949091	0.956088	0.949254	0.919355	0.960159	0.959325	0.377703	0.543363	0.327937	0.667568	0.976521	0.936952	0.93462	0.495198	0.908958	0.996797
2513020848	Bti_contig00111_ace.1	572010	DEL	TA	T	0	0	1	0	0	0	0	0	0.692308	0.785235	0.717514	0.65035	0.721212	0.647887	0.719512	0.746479	0.718593	0.796875	0.738636	0.720721	0.68	0.763314	0.751244	0.676301	0.76	0	0.713287	0.75	0.896914	0.830089	0.000662239	0.230774	0.00420599	0.970972	0.93462	0.0355717	0.763768	0.292945
2513020848	Bti_contig00111_ace.1	572042	DEL	AG	A	0	0	0	0	0	0	0	0	0	0	1	0	0	1	1	0	0	0	0	0	0	0	0	0.983193	0	0	1	1	0.671321	0.529918	0.305232	0.0449308	0.495016	0.951052	0.93462	0.470357	0.623885	0.996797
2513020848	Bti_contig00111_ace.1	587392	RPL	GTAGTACAATGTGTTTTTTATTTTACT	GAGTACAATGTGTTTTTTA..AATGTTTTTTTTATTTTAC	0	1	0	1	1	1	1	1	1	1	1	1	1	1	1	1	1	1	1	1	1	1	1	1	1	1	1	1	0.179451	0.767905	0.238272	0.231568	0.0682112	0.936952	0.93462	0.465922	0.763768	0.920428
2513020848	Bti_contig00111_ace.1	587392	RPL	GTAGTACAATGTGTTTTTTATTTTACT	GAGTACAATGTGTTTTTTATTTTAC	1	0	0	0	0	0	0	0	0	0	0	0	0	0	0	0	0	0	0	0	0	0	0	0	0	0	0	0	0.179451	0.767905	0.238272	0.231568	0.0682112	0.936952	0.93462	0.465922	0.763768	0.920428
2513020848	Bti_contig00111_ace.1	587417	DEL	CT	C	0	0	0	0	0	0	0	0	0	1	1	0	0	0	0	0	0	0	0	0	0	0	0	0	0	0	0	0	0.811349	0.951051	0.0967713	0.443373	0.624405	0.951052	0.984019	0.375114	0.908958	0.996797
2513020848	Bti_contig00111_ace.1	600062	DEL	TA	T	0.881119	0.910053	0.96	0.893096	0.904459	0.93	0.960177	0.931579	0.895262	0.876588	0.89	0.848485	0.85	0.869281	0.828571	0.85489	0.83237	0.821012	0.850534	0.862069	0.867868	0.814371	0.831135	0.880597	0.892473	0.925926	0.901408	0.860058	0.531192	0.852922	0.0108688	0.469767	0.021887	0.951052	0.941155	0.114847	0.908958	0.603551
2513020848	Bti_contig00111_ace.1	600068	RPL	AAGCGCCTACATATGTATA..GTATGTTCTTTATGGCCAC	AGCGACTACATATGTATAT..GTATGTTCTTTATGGCCAC	0	0	0	0	0	0	0.00980392	0	0.0333333	0.023622	0	0.0301724	0	0.026087	0.0628571	0	0	0	0	0	0	0	0	0	0	0	0	0.0233051	0.464043	0.420909	0.324711	0.654523	0.0872167	0.936952	0.93462	0.492304	0.908958	0.92644
2513020848	Bti_contig00111_ace.1	603850	DEL	GA	G	0.735294	0.711864	0	0.728571	0	0.753846	0.670732	0.631579	0.875706	0.757009	0.760766	0.684211	0.785366	0.718062	0.670886	0.688525	0.709343	0.748428	0.626943	0.759197	0.746154	0.740933	0.736111	0.752066	0.763636	0.771812	0.685246	0.687332	0.393898	0.955138	0.600669	0.864908	0.636965	0.936952	0.984019	0.719273	0.910694	0.996797
2513020848	Bti_contig00111_ace.1	603858	RPL	AACGTCTTCTAAATTTAGAAGACGTTTTTTAT	ACGTCTTCTAAATTTAGAAGACGTTTTTTTA	0	0	0	0	0	0	0	0	0	0	0	0	0	0	0	0	0	0	0	0	0	0	0	0	0	0	1	0	NA	NA	0.408666	0.144827	0.464012	NA	NA	0.561297	0.623885	0.996797
2513020848	Bti_contig00111_ace.1	603858	RPL	AACGTCTTCTAAATTTAGAAGACGTTTTTTAT	ACGTCTTCTAAATTTAGAA..TTTAGAAGACGTTTTTTTA	0	0	0	0	0	0	0	0	0	1	1	1	0.991453	1	1	1	0	0	1	0	0	0	1	0	0	0	0	0.995595	0.411322	0.541101	0.92152	0.280573	0.0348519	0.936952	0.93462	0.941553	0.858679	0.751348
2513020848	Bti_contig00111_ace.1	610171	INS	T	TA	0.886179	0.837037	0.5	0.909968	0.946237	0.883333	0.848649	0.886878	0.899015	0.896309	0.882236	0.95283	0.897129	0.902985	0.943243	0.910913	0.892241	0.884498	0.933702	0.88582	0.892857	0.88946	0.91635	0.902954	0.948413	0.961078	0.891847	0.900388	0.115485	0.639652	0.0870796	0.484819	0.560247	0.936952	0.93462	0.352064	0.908958	0.996797
2513020848	Bti_contig00111_ace.1	620626	INS	C	CT	0.990196	0	1	NA	NA	0.948718	0.951087	0.962406	0.954545	0.941176	0.969163	0.985577	0.965854	0.936275	0.975709	0.965035	0.974763	0.941176	0.953191	0.951456	0.948718	0.974441	0.971098	0.982332	0.949686	0.932203	0.966581	0.970339	0.407767	0.932839	0.218333	0.427366	0.167961	0.936952	0.977792	0.459143	0.908958	0.996797
2513020848	Bti_contig00111_ace.1	628008	DEL	GT	G	1	1	1	1	1	1	1	1	1	1	1	1	1	1	0.994186	1	1	1	1	1	1	1	1	1	1	1	1	0.997195	0.086463	0.636853	0.271517	0.265991	0.618138	0.936952	0.93462	0.465922	0.833437	0.996797
2513020848	Bti_contig00111_ace.1	629418	DEL	GA	G	0.958678	0.94702	0	0.943548	0.905172	0.961905	0.977716	0.949153	0.974843	0.96044	0.967593	0.957219	0.933702	0.931624	0.977591	0.971831	0.974555	0.99262	0.97076	0.956262	0.940741	0.97151	0.958015	0.951002	0.963899	0.97153	0.960836	0.967603	0.92509	0.120337	0.333944	0.659616	0.506402	0.980485	0.93462	0.499346	0.908958	0.996797
2513020848	Bti_contig00111_ace.1	888990	INS	C	CT	0.906977	0.880102	0.608696	0.844311	0.809917	0.927739	0.912863	0.9025	0.917808	0.933116	0.925234	0.895487	0.881319	0.878981	0.8861	0.896491	0.896272	0.871134	0.89881	0.892598	0.921829	0.913556	0.915328	0.933213	0.949153	0.885856	0.930323	0.936683	0.548834	0.418708	0.0732987	0.0375958	0.730356	0.951052	0.93462	0.320469	0.623885	0.996797
2513020848	Bti_contig00111_ace.1	941649	DEL	GT	G	0	0	0	0	0	0	0	0	0	1	0	1	1	1	0	0	1	0	0	0	0	0	0	1	0	0	1	1	0.12457	0.0488654	0.330241	0.0051019	0.43136	0.936952	0.93462	0.496683	0.289466	0.996797
2513020848	Bti_contig00111_ace.1	941649	RPL	GTCTATTTACGGACAGTAAGCTCCCAAGTTTCT	GCTATTTACGGACAGTAAG..CAGTAAGCTCCCAAGTTTC	1	1	1	1	1	1	1	1	1	0.997245	1	1	1	1	1	1	1	1	1	0.979592	1	1	1	1	0.980519	1	0.873272	0.882129	0.513356	0.779215	0.937489	0.108766	0.408194	0.951052	0.93462	0.952691	0.623885	0.996797
2513020848	Bti_contig00111_ace.1	941680	DEL	CT	C	1	0	1	1	1	1	1	0	1	0.987578	1	1	1	1	1	1	1	1	0	0	0	0	0	1	1	0	1	1	0.91115	0.548934	0.100093	0.570979	0.890611	0.974463	0.93462	0.37915	0.908958	0.996797
2513020848	Bti_contig00111_ace.1	1020762	DEL	TA	T	0.915663	0.868946	1	0.852861	0.971989	0.888112	0.922879	0.910959	0.90404	0.887776	0.879245	0.889117	0.889423	0.876847	0.925602	0.857923	0.891892	0.908434	0.914989	0.931852	0.931526	0.906796	0.901235	0.874327	0.899281	0.900875	0.904	0.881579	0.181028	0.763647	0.22835	0.766771	0.960827	0.936952	0.93462	0.459143	0.908958	0.996797
2513020848	Bti_contig00111_ace.1	1055796	RPL	TGCATGTACTTATTATTAAT	TTATTATTAA	0	0	0.159763	0	0.12294	0	0	0	0	0	NA	NA	NA	NA	NA	NA	NA	NA	NA	NA	NA	NA	NA	NA	0	0	NA	NA	0.758517	0.651489	0.70061	0.968828	NA	0.951052	0.93462	0.795859	0.97662	NA
2513020848	Bti_contig00111_ace.1	1055953	RPL	CGAATTACAATGGATGCCCGTAAATCTTTT	CAAATTACAATGGATGCCC..GGATGCCCTTAAATCTGCG	0.00688073	0.0105263	0	0	0.00813008	0	0	0	0.00815661	0.0141677	0.0120968	0.0112179	0	0.0199275	0.0145191	0.00941915	0	0	0.00809717	0.0288714	0.0564706	0	0.00747198	0	0	0	0	0	0.160984	0.663981	0.988465	0.708939	0.346445	0.936952	0.93462	0.988465	0.908958	0.996797
2513020848	Bti_contig00111_ace.1	1089527	INS	G	GT	0.888889	0.889157	0.787879	0.96	0.868217	0.833333	0.891832	0.810811	0.893564	0.89317	0.897143	0.860784	0.878728	0.910714	0.91453	0.871542	0.892514	0.866492	0.883516	0.887427	0.87013	0.855691	0.890226	0.878229	0.870091	0.842227	0.862981	0.890449	0.283017	0.793129	0.202096	0.734807	0.984015	0.936952	0.93462	0.459143	0.908958	0.996797
2513020848	Bti_contig00111_ace.1	1172279	INS	G	GA	0.894928	0.887538	1	0.95614	0.938356	0.894737	0.878553	0.89781	0.868493	0.86422	0.87796	0.915929	0.889888	0.838264	0.905376	0.896057	0.909091	0.882353	0.878613	0.90313	0.867953	0.862185	0.890704	0.855556	0.913793	0.867725	0.915479	0.916528	0.0749807	0.416229	0.208898	0.702802	0.934997	0.936952	0.93462	0.459143	0.908958	0.996797
2513020848	Bti_contig00111_ace.1	1261874	DEL	TCA	T	0	0	0	0	0.0572519	0	0	0	0	0	0	0	0	0	0	0	0	0	0	0	0	0	0	0	0	0	0	0	0.807279	0.803083	0.297169	0.871941	0.700825	0.951052	0.93462	0.465922	0.910694	0.996797
2513020848	Bti_contig00111_ace.1	1291416	INS	A	AC	0.997403	0.995943	1	0.993808	1	0.994318	0.996403	0.992172	0.986641	0.988532	0.992386	1	0.989796	1	0.997423	1	1	0.996825	0.994334	0.997658	0.992958	0.988166	0.995842	0.997222	0.995261	0.980831	0.996086	0.996942	0.363043	0.800569	0.215929	0.755837	0.975504	0.936952	0.93462	0.459143	0.908958	0.996797
2513020848	Bti_contig00111_ace.1	1291839	RPL	CATTTGCAAAGCTTTGAAC..GCAGCAACTACTTCTACAA	CCATTTCTTGCTGTGTTTC..CTTCCGCAATTACTTCCAC	0	0.0491803	0	0.0820513	0.0380435	0.0564516	0.0333333	0.0265487	0.0285714	0.0538117	0.031746	0.0769231	0	0.0485437	0.0648148	0.0534351	0.0469799	0	0	0	0	0	0.0441989	0	0	0	0.0357143	0.0392157	0.820466	0.252988	0.0258804	0.720836	0.76822	0.953572	0.93462	0.15893	0.908958	0.996797
2513020848	Bti_contig00111_ace.1	1291864	INS	T	TTTCGTTTGTTCATCAGCCTCAGCAACATGTATGAATTCA	0	0	0.545455	0.11811	0.0180995	0	0	0	0.122642	0.142045	0	0.157303	0	0.0860215	0	0	0.12782	0	0	0	0	0	0	0	0	0	0	0	0.607941	0.657587	0.0340603	0.917397	0.259456	0.951052	0.93462	0.190765	0.937341	0.996797
2513020848	Bti_contig00111_ace.1	1409432	INS	A	AT	0.893671	0.854545	1	0.917949	0.760956	0.900901	0.928571	0.933594	0.886905	0.945892	0.940559	0.89876	0.904459	0.934211	0.900673	0.932119	0.94487	0.889328	0.903543	0.895641	0.910591	0.948007	0.887451	0.926094	0.931442	0.94709	0.909091	0.926205	0.423301	0.555018	0.260972	0.798698	0.96756	0.936952	0.93462	0.465922	0.908958	0.996797
2513020848	Bti_contig00111_ace.1	1494944	INS	A	AT	0	0	0	0	0.0526316	0	0	0	0	0	0	0	0	0	0	0	0	0	0	0	0	0	0	0	0	0	0	0	0.807279	0.803083	0.297169	0.871941	0.700825	0.951052	0.93462	0.465922	0.910694	0.996797
2513020848	Bti_contig00111_ace.1	1572590	INS	C	CAAA	0	0	0	0	NA	0	0	0	0	0	0.0601504	0.0344828	0.0660377	0	0.0982143	0	0.0708661	0.0619469	0.0567376	0.0734463	0.0352941	0.0578512	0	0	0	0	0.0674157	0.0627615	0.232743	0.439702	0.137257	0.298403	0.71004	0.936952	0.93462	0.426517	0.863074	0.996797
2513020848	Bti_contig00111_ace.1	1572590	INS	C	CA,CAA	0	0	0.636364	0	NA	0	0	0	0	0	0.100719	0.111111	0.123894	0.0842105	0.151261	0.141667	0.125926	0.131148	0.125	0.145833	0.103825	0.116279	0.157895	0	0	0	0.139896	0.11811	0.511169	0.667113	0.0588215	0.368471	0.109717	0.951052	0.93462	0.27996	0.908958	0.932596
2513020848	Bti_contig00111_ace.1	1572590	INS	C	CAA	0.442748	0.516393	0	0	NA	0.503448	0.42953	0.342466	0.576923	0.502591	0.543796	0.495495	0.514706	0.57561	0.549107	0.609848	0.561338	0.490385	0.498113	0.484277	0.481013	0.532787	0.527869	0.62605	0.431034	0.641414	0.489231	0.452323	0.0877547	0.264386	0.736261	0.835995	0.707879	0.936952	0.93462	0.821466	0.910694	0.996797
2513020848	Bti_contig00111_ace.1	1588409	DUP	CTTTGTTAATTCTTCTTTT..CGGAAACTTCACGCCTAGT	CTTTGTTAATTCTTCTTTT..CGGAAACTTCACGCCTAGT	0.140496	0	0	NA	0	0	0	NA	NA	NA	0	0	0	0	0	0	NA	0	0	0.154107	0.168483	0	0	0.172374	0.146819	0	0.165094	0.152922	0.688505	0.473251	0.169308	0.420822	0.225402	0.951052	0.93462	0.459143	0.908958	0.996797
2513020848	Bti_contig00111_ace.1	1588573	DEL	GT	G	1	1	1	1	1	1	1	1	NA	NA	1	1	0.990566	1	1	0.993865	1	1	1	1	1	1	1	1	1	1	1	0.996466	0.773383	0.0926189	0.282988	0.67763	0.979871	0.951052	0.93462	0.465922	0.908958	0.996797
2513020848	Bti_contig00111_ace.1	1608762	DEL	TTA	T,TTATA	0.0340909	0.021978	0.0654206	0.0265655	0.150743	0.034188	0.141058	0.147239	0.074928	0.0151976	0.0152866	0.0929134	0.0107143	0.0684474	0.0714286	0.107011	0.00927152	0.0127273	0.0753701	0.0172414	0.00829384	0.0115774	0.126596	0.0115385	0.0873016	0	0.0204626	0.017869	0.593801	0.182448	0.113444	0.657025	0.535756	0.951052	0.93462	0.402405	0.908958	0.996797
2513020848	Bti_contig00111_ace.1	1608762	DEL	TTATA	T,TTATATATA	0.0349515	0.0436137	0	0.0780399	0.044186	0.0543634	0.0354108	0.0382609	0.0362538	0.018711	0.0131752	0.0154374	0.0216216	0.0282686	0.012012	0.0177112	0.0199734	0.0276753	0.0201439	0.0165198	0.0181818	0.0130058	0.0192077	0.0208062	0.0321888	0.0168067	0.0274474	0.0197817	0.598638	0.451405	0.0023149	0.592989	0.123545	0.951052	0.93462	0.0934503	0.908958	0.962237
2513020848	Bti_contig00111_ace.1	1608762	INS	TTATA	T,TTA,TTATATA	0.141397	0.148405	0.0333333	0.189103	0.047836	0.13394	0.0392157	0.0364583	0.0225904	0.0867493	0.0810157	0.0102389	0.0884808	0.0139373	0.0175695	0.011984	0.0987805	0.0986395	0.0154278	0.0673575	0.0983607	0.103811	0.0200472	0.0765492	0.0167715	0	0.0883095	0.106265	0.830788	0.809564	0.0851097	0.693502	0.0187785	0.953572	0.93462	0.351662	0.908958	0.585263
2513020848	Bti_contig00111_ace.1	1642894	RPL	CTATAGGTAAAAGA	CATAGGTAAAAG,CATAGG..AAAAAG,CATAGGTGAAAG	1	0.992188	0	0	0	1	1	1	0	1	1	1	1	1	1	1	1	0	1	0	1	1	1	1	1	0	0.986755	0.433099	0.447284	0.450186	0.383858	0.790527	0.617748	0.936952	0.93462	0.554295	0.908958	0.996797
2513020848	Bti_contig00111_ace.1	1674129	RPL	CGTTTTTTTAT	CTTTTTTTA,CTTTTTTAT	0	0	0	0	0	0	0	0	0	0	0	0	0	0	0	0	0	0	0	0	0	0	0	0	0	0	1	1	0.47386	0.698222	0.0479173	8.2564e-07	0.000941848	0.936952	0.93462	0.240562	0.000167865	0.123283
2513020848	Bti_contig00111_ace.1	1674129	DEL	CGT	C,CT	1	1	1	1	1	1	1	1	1	1	1	1	1	1	1	1	1	1	1	1	1	1	1	1	1	1	0	0	0.47386	0.698222	0.0431816	0.0248072	0.392025	0.936952	0.93462	0.225504	0.623885	0.996797
2513020848	Bti_contig00111_ace.1	1674136	RPL	TTAT	TA	1	0	0	0	0	1	1	1	1	1	1	1	1	1	1	1	1	1	0.993333	0	1	1	1	1	1	0	1	0.997625	0.748564	0.835049	0.657451	0.909124	0.486878	0.951052	0.935678	0.767707	0.932864	0.996797
2513020848	Bti_contig00111_ace.1	1819863	RPL	AGCACCTTCTTCTTTAGAGAAATAAACCGCA	AGCA,ACCCCCTTCTTTTTTAGAAAAATAACCCCCC	0	0	0	0.00961538	0	0	0.00684932	0	0	0	0	0	0	0	0	0	0	0.338333	0	0.00406174	0.582069	0	0	0	0	NA	0	0	0.377458	0.782541	0.283456	0.703342	0.864857	0.936952	0.93462	0.465922	0.908958	0.996797
2513020848	Bti_contig00111_ace.1	1827192	DEL	CAGCGCTAACACCAAAATG..CTGCGTTATTATTGTTATA	C	0	0	0	0	0.0118919	0	0	0	0	0	0	0	0	0	0.356091	0	0	0	0.668874	0	0	0	0	0	0	0	0.445328	0	0.00010799	0.581526	0.187056	0.71796	0.799744	0.0382284	0.93462	0.459143	0.908958	0.996797
2513020848	Bti_contig00111_ace.1	1938161	INS	G	GT	0.907258	0.895706	1	0.928251	0.870968	0.927586	0.951299	0.907609	0.880734	0.887006	0.907258	0.958738	0.916484	0.946882	0.923518	0.898451	0.896707	0.903704	0.88671	0.875173	0.906158	0.904847	0.883506	0.920792	0.947195	0.916435	0.91958	0.924132	0.961064	0.235881	0.200715	0.743039	0.981707	0.989188	0.93462	0.459143	0.908958	0.996797
2513020848	Bti_contig00111_ace.1	2046825	DEL	CA	C	0.711538	0	NA	0	0	0	0	0	0	0	0.736842	0.666667	0.656566	0.68932	0.789474	0.730496	0.693333	0.614679	0.68	0	0.769697	0.78125	0.766082	0.757962	0.784314	0	0.810427	0.783439	0.378704	0.389381	0.0845263	0.161923	0.134047	0.936952	0.93462	0.351662	0.653121	0.962237
2513020848	Bti_contig00111_ace.1	2046830	RPL	AATTATCTGTATTA	ATTATCTGTATT	1	1	NA	1	1	1	1	1	1	1	1	1	1	1	1	1	1	1	1	1	0.860327	1	1	1	0.992806	1	0.963595	0.997758	0.17909	0.790151	0.189113	0.746053	0.969007	0.936952	0.93462	0.459143	0.908958	0.996797
2513020848	Bti_contig00111_ace.1	2046842	DEL	TA	T	0	0	0	0	0	0	0	0	0	0	0	0	0	0	0	0	0	0	0	0	0	0	0	0	0	0	0.988889	0.980296	0.47386	0.698222	0.048588	8.929e-07	0.000988903	0.936952	0.93462	0.240562	0.000167865	0.123283
2513020848	Bti_contig00111_ace.1	2176720	RPL	AACTCAAGGGAGTTCTCCCTTCGAG	ACTCAAGGGATTCTCCCTT..AAGGGGTTCTCCCTTGAGG	0	0	0	0	0	0.982906	0	0	0.990909	1	1	1	1	1	1	1	1	1	1	1	0.853659	1	1	1	1	1	0.659236	0.678186	0.611797	0.324243	0.247117	0.832923	0.044603	0.951052	0.93462	0.465922	0.910694	0.834076
2513020848	Bti_contig00111_ace.1	2180445	INS	G	GA	0.981567	0.991736	1	0.97786	1	0.983471	0.973485	0.98324	0.965779	0.972222	0.983389	0.954733	0.975845	0.973568	0.982332	0.969325	0.975976	0.977099	0.967857	0.947368	0.951567	0.981752	0.980874	0.943894	0.983607	NA	0.977273	0.990521	0.891505	0.390389	0.18163	0.776771	0.98043	0.970972	0.93462	0.459143	0.908958	0.996797
2513020848	Bti_contig00111_ace.1	2301017	RPL	ATGATG	ACAATA	0.0164706	0.0122449	NA	0.0207612	0.0233766	0.0493421	0.0409253	0.0378378	0.028626	0.00858369	0.0075	0	0	0.0248619	0.0258621	0.0201835	0.0600707	0.0272109	0.0277136	0.0224299	0.027027	0.0622568	0.0210526	0.0160643	0.0241379	0.0268817	0.0207715	0.0153005	0.568712	0.722408	0.804494	0.347624	0.450126	0.951052	0.93462	0.876917	0.908958	0.996797
2513020848	Bti_contig00111_ace.1	2321700	DEL	CA	C	1	1	1	1	1	1	1	1	1	1	1	1	1	1	1	1	1	1	1	1	1	1	1	1	1	1	1	1	NA	NA	0.214882	0.76377	0.972663	NA	NA	0.459143	0.908958	0.996797
2513020848	Bti_contig00111_ace.1	2331844	DEL	CT	C	1	1	1	1	1	1	1	1	1	1	1	1	1	1	1	1	1	1	1	1	1	1	1	1	1	1	1	1	NA	NA	0.214882	0.76377	0.972663	NA	NA	0.459143	0.908958	0.996797
2513020848	Bti_contig00111_ace.1	2368256	DEL	CA	C	0.942308	0.976636	NA	0.90625	0.849879	0.95082	0.968566	0.973684	0.942584	0.967273	0.959559	0.972441	0.940828	0.975248	0.948365	0.955766	0.952381	0.936709	0.944238	0.947075	0.953623	0.925566	0.961272	0.966387	0.948837	0.954751	0.974933	0.95301	0.219566	0.89759	0.223988	0.785617	0.978329	0.936952	0.96481	0.459143	0.908958	0.996797
2513020848	Bti_contig00111_ace.1	2368372	INS	A	AT	0.885714	0.8625	0.52	0.738095	0.684848	0.860182	0.84	0.847953	0.805447	0.86711	0.861048	0.871795	0.869318	0.824289	0.902507	0.884161	0.895918	0.849432	0.857143	0.845842	0.873469	0.831707	0.851376	0.818182	0.837143	0.873646	0.838317	0.847918	0.687823	0.529929	0.284761	0.678788	0.979524	0.951052	0.93462	0.465922	0.908958	0.996797
2513020848	Bti_contig00111_ace.1	2509530	DUP	CTGCCACCAGAACCGTTGC..CCATTGCCATCAGAACCGT	CTGCCACCAGAACCGTTGC..CCATTGCCATCAGAACCGT	0.111111	0.0938776	0	0.0698324	0.105727	0.0981818	0.132275	0.0472973	0.066482	0.101626	0.0893471	0.0753138	0.102564	0.0992063	0.0985915	0.0966767	0.0689655	0.06639	0.0843373	0.0860215	0.0979827	0.0995671	0.0826873	0.0840708	0	0.110795	0.0688073	0.0606061	0.951221	0.684642	0.0836253	0.648594	0.932926	0.987693	0.93462	0.351662	0.908958	0.996797
2513020848	Bti_contig00111_ace.1	2527347	RPL	TACATTTGCTTGGT	TCATTTGCTTGG,TCAGTTGCTTGG	0.996942	0.996774	0	1	1	1	1	1	1	1	1	1	1	1	0.984962	1	1	1	0.99061	1	1	1	1	1	0.996933	1	0.989461	0.983463	0.0317695	0.560601	0.208029	0.764971	0.975927	0.936952	0.93462	0.459143	0.908958	0.996797
2513020848	Bti_contig00111_ace.1	2545815	RPL	TAGTAAAATTAGTAAACAGTCTCT	TGTAAAATTGTAAACAGTCTC	0	1	0	0	1	0	1	0	0	0	0	1	0	0	1	1	0	0	0	1	1	0	0	0	0	0	1	0	0.271182	0.280972	0.897339	0.314167	0.92438	0.936952	0.93462	0.926922	0.888171	0.996797
2513020848	Bti_contig00111_ace.1	2545815	RPL	TAGTAAAATTAGTAAACAGTCTCT	TGTAAAATTGTAAACAGTC..GTAAAATTGTAAACAGTCT	0	0	0	1	0	0	0	1	1	1	1	0	1	1	0	0	1	1	1	0	0	1	1	1	1	0	0	0.982893	0.214584	0.539183	0.677169	0.375552	0.470946	0.936952	0.93462	0.783432	0.908958	0.996797
2513020848	Bti_contig00111_ace.1	2545815	RPL	TAGTAAAATTAGTAAACAGTCTCT	TGTAAAATTAGTAAACAGT..AAAATTGTAAACAGTCTCT	0.995146	0	1	0	0	1	0	0	0	0	0	0	0	0	0	0	0	0	0	0	0	0	0	0	0	1	0	0	0.748204	0.460967	0.410346	0.560663	0.237778	0.951052	0.93462	0.561297	0.908958	0.996797
2513020848	Bti_contig00111_ace.1	2566961	INS	G	GT	NA	NA	NA	NA	NA	NA	NA	NA	NA	NA	0.812834	0.793333	NA	NA	NA	NA	NA	NA	NA	NA	0.827027	NA	NA	NA	NA	0.903743	0.940594	0.863636	0.251851	0.150391	0.274784	0.498924	0.89709	0.936952	0.93462	0.465922	0.908958	0.996797
2513020848	Bti_contig00111_ace.1	2673449	DEL	TA	T	0.892045	0.934247	1	0.930667	0.808642	0.912442	0.902439	0.952542	0.934247	0.879699	0.93621	0.859316	0.931478	0.926407	0.918871	0.926874	0.928682	0.90393	0.926531	0.930168	0.921238	0.92605	0.913706	0.931624	0.931232	0.900227	0.917722	0.915584	0.631186	0.913321	0.247463	0.772612	0.979226	0.951052	0.97421	0.465922	0.908958	0.996797
2513020848	Bti_contig00111_ace.1	2697776	INS	C	CT	0.926686	0.86351	0.727273	0.928	0.995536	0.905941	0.904306	0.88716	0.901408	0.926778	0.93988	0.922306	0.945455	0.934959	0.938559	0.92638	0.929329	0.919897	0.934066	0.935811	0.914783	0.929787	0.954041	0.938166	0.936747	0.938667	0.949569	0.944392	0.560728	0.178879	0.246899	0.767929	0.982166	0.951052	0.93462	0.465922	0.908958	0.996797
2513020848	Bti_contig00111_ace.1	2941971	DEL	GA	G	1	1	1	1	1	0.992593	1	1	1	0.995062	1	1	1	1	1	1	1	1	1	1	1	1	1	1	1	1	1	1	0.83279	0.849316	0.216817	0.761523	0.973801	0.953572	0.940124	0.459143	0.908958	0.996797
2513020848	Bti_contig00111_ace.1	3002621	INS	C	CA	0.926267	0.927632	1	0.875	0.731343	0.932308	0.858462	0.865	0.839142	0.864811	0.869231	0.858896	0.861446	0.868687	0.832827	0.780051	0.830508	0.881188	0.888889	0.82963	0.798144	0.844737	0.888412	0.855072	0.883721	0.880631	0.888641	0.85443	0.910027	0.686167	0.18362	0.747476	0.958334	0.974463	0.93462	0.459143	0.908958	0.996797
2513020848	Bti_contig00111_ace.1	3027293	DEL	TA	T	0.934272	0.905192	0.92	0.964912	0.983516	0.943478	0.940299	0.909091	0.89418	0.905797	0.884786	0.924528	0.888031	0.884232	0.923497	0.880911	0.88764	0.896353	0.928437	0.918605	0.898305	0.916409	0.897436	0.868502	0.880342	0.887531	0.90916	0.907801	0.0236973	0.131019	0.172763	0.742873	0.941947	0.936952	0.93462	0.459143	0.908958	0.996797
2513020848	Bti_contig00111_ace.1	3091201	DEL	CAAGGAAAAGTAGTAACGA..TTCGAAGTGCAAGATGAAA	C	0.412351	0.368421	0	0.412088	0.383989	0.415441	0.393175	0.381818	0.308955	0.349848	0.447633	0.458801	0.418895	0.427835	0.388982	0.424348	0.369408	0.333333	0.401709	0.397172	0.418398	0.366853	0.410976	0.406542	0.372928	0.432432	0.410023	0.404814	0.388717	0.195136	0.205348	0.607766	0.967775	0.936952	0.93462	0.459143	0.908958	0.996797
2513020848	Bti_contig00111_ace.1	3091219	RPL	AACAGTG	ACAGT	1	1	1	1	0.995025	1	1	1	1	1	1	1	1	1	1	0.993711	1	1	0	0	1	1	1	1	0	0	1	1	0.323596	0.408614	0.0250726	0.987733	0.911128	0.936952	0.93462	0.15893	0.990367	0.996797
2513020848	Bti_contig00111_ace.1	3091322	RPL	AAAACCAGTATCATTCGAA..AAAGCTAGAAAAACCAGTA	AGAAAAACCAGT	1	1	1	1	0.997093	1	1	1	1	1	1	1	1	1	1	0.996479	1	1	1	1	1	1	1	1	1	1	1	1	0.773466	0.661103	0.214855	0.764953	0.97288	0.951052	0.93462	0.459143	0.908958	0.996797
2513020848	Bti_contig00111_ace.1	3091325	RPL	ACCAGTATCATTCGAAATC..GCTAGAAAAACCAGTAATC	AAAACCGGTATT	0.880342	0.896296	0	0.901961	0.941558	0.878378	0.950276	0.895105	0.92029	0.881041	0.920635	0.932773	0.936937	0.915966	0.9	0.927419	0.859259	0.926606	0	0.91954	0	0	0	0.960938	0	0	0.940239	0.958763	0.422264	0.82735	0.00612557	0.680239	0.897922	0.936952	0.93462	0.114847	0.908958	0.996797
2513020848	Bti_contig00111_ace.1	3091351	DUP	GTATGACGAAAGTTTTATC..AAGTTACAAATTAGTAGAG	GTATGACGAAAGTTTTATC..AAGTTACAAATTAGTAGAG	NA	0	0	0.0647709	0	0	0	0	0	0	0	NA	0	0	0	0	0	0	NA	NA	0	0	NA	0	0	NA	0	0	0.135872	0.392271	0.313067	0.736671	0.436183	0.936952	0.93462	0.478509	0.908958	0.996797
2513020848	Bti_contig00111_ace.1	3093154	DUP	AAAGGAAAAGTAGTAACGA..TTCGAAGTACAAGATGAGC	AAAGGAAAAGTAGTAACGA..TTCGAAGTACAAGATGAGC	0	0	0	0	0	0	0	0	0.0858525	0.11358	0	0	0	0.00521739	0	0	0	0	0	0	0.00582242	0	0	0	0	0	0.00492611	0	0.528439	0.237788	0.0728933	0.0495239	0.0288004	0.951052	0.93462	0.320469	0.623885	0.692851
2513020848	Bti_contig00111_ace.1	3093294	DEL	AATTAAAAAAGGTATGACA..CGAACCAGTATCATTTGAG	A	0.247036	0.198387	0	0.15186	0.173432	0.232335	0.253558	0.25	0.261324	0.23876	0.219668	0.272575	0.220986	0.269394	0.276276	0.226471	0.264877	0.29983	0.267176	0.282927	0.282297	0.244475	0.277081	0.26788	0.282276	0.211409	0.268839	0.229992	0.896809	0.760586	0.62679	0.87792	0.817933	0.970972	0.93462	0.743448	0.914398	0.996797
2513020848	Bti_contig00111_ace.1	3093317	RPL	TCTTTATCACTTGAAAAGT..GAACAGTTAGACTAAAGGC	TTTTATCACTAAAAGTAGA..GAACAGTTAGACTAAAGGC	1	1	0	0	1	1	1	1	1	1	1	1	1	1	1	1	1	1	1	1	1	1	1	0.970085	1	1	0.997175	0.981818	0.252889	0.377982	0.456899	0.863566	0.903699	0.936952	0.93462	0.594443	0.910694	0.996797
2513020848	Bti_contig00111_ace.1	3093317	RPL	TCTTTATCACTTGAAAAGT..TCAGTAGAAATTACAAAAG	TTTTATCACTAAAAGTAGA..AAAGTAGAGAATGAACAGT	0	0	1	0	0.130435	0	0	0	0	0	0	0	0	0	0	0	0	0	0	0	0	0	0	0	0	0	0	0	0.807279	0.803083	0.297169	0.871941	0.700825	0.951052	0.93462	0.465922	0.910694	0.996797
2513020848	Bti_contig00111_ace.1	3093353	RPL	ACTAAAGGC	ATAAAGG	0	0	0	0	0	0	0	0	1	1	0	0	0	0	0	0	0	0	0	0	0	0	0	0	0	0	0	0	0.456917	0.155009	0.0675765	0.0521128	0.0296407	0.936952	0.93462	0.310252	0.623885	0.692851
2513020848	Bti_contig00111_ace.1	3093361	DUP	CTTCAGTAGAAATTACAAA..ATGAACAGTTAGATAAAGG	CTTCAGTAGAAATTACAAA..ATGAACAGTTAGATAAAGG	NA	NA	NA	NA	NA	NA	NA	NA	NA	0.221925	NA	NA	NA	NA	NA	NA	NA	NA	NA	NA	NA	NA	NA	NA	NA	NA	NA	NA	NA	NA	NA	NA	NA	NA	NA	NA	NA	NA
2513020848	Bti_contig00111_ace.1	3093526	RPL	AGACGGAAAGCTTACCAGG..CGAACCAGTATCATTTGAG	AAGTAGAAAATTTACCAGG..AGAGCCAGTATCATTCGAA	0.0315091	0.0289855	0.0248447	0	0.0274443	0.0406746	0.0285714	0.0353982	0	0	0	0.0335366	0	0	0.046729	0.0394575	0.030426	0.0284431	0.0545213	0.0507099	0.0438247	0.0278746	0.0452716	0.0560538	0.0371901	0	0.0365511	0	0.0577149	0.127381	0.166427	0.0435514	0.95211	0.936952	0.93462	0.459143	0.623885	0.996797
2513020848	Bti_contig00111_ace.1	3123945	DEL	TAGAAAAGGTGT	TGAAAAGGTGT,TGAAAAGGTG	1	0	0	0	0	0	0	0	0	0	0	0	0	0	0	0	0	0	0	0	0	0	0	0	0	0	0	0	0.179451	0.767905	0.238272	0.231568	0.0682112	0.936952	0.93462	0.465922	0.763768	0.920428
2513020848	Bti_contig00111_ace.1	3123945	RPL	TAGAAAAGGTGT	TGAAAAGGTG,TGAAAATGTG	0	0	0	0	0	0	0	0	0	1	1	1	0.929825	1	1	1	0.992958	0	0.89916	1	1	0	0.942408	1	0	0	1	0.996503	0.610316	0.501292	0.354605	0.389072	0.0964257	0.951052	0.93462	0.524926	0.908958	0.92644
2513020848	Bti_contig00111_ace.1	3179580	INS	G	GTT	0	0	0	0	0	0	0	0	0	0	0.0521739	0	0	0	0	0	0	0	0	0	0	0	0	0	0	0	0	0	0.775158	0.783274	0.280909	0.530954	0.439362	0.951052	0.93462	0.465922	0.908958	0.996797
2513020848	Bti_contig00111_ace.1	3179580	INS	G	GT	0.748252	0.786834	0.971014	0.775785	0.977273	0.857664	0.837535	0.904545	0.810526	0.769412	0.780242	0.780488	0.822943	0.845209	0.801268	0.813387	0.817485	0.791667	0.772043	0.833068	0.81129	0.784585	0.78374	0.83619	0.792994	0.786325	0.843666	0.835143	0.349835	0.591677	0.183372	0.853371	0.944892	0.936952	0.93462	0.459143	0.910694	0.996797
2513020849	Bti_contig00025_ace.2	833	DEL	TTC	T	0	0	0	0	0.0503979	0	0	0	0	0	0	0	0	0	0	0	0	0	0	0	0	0	0	0	0	0	0	0	0.807279	0.803083	0.297169	0.871941	0.700825	0.951052	0.93462	0.465922	0.910694	0.996797
2513020849	Bti_contig00025_ace.2	10699	DEL	AC	A	0	1	1	1	1	1	0	1	0	0	0	0	0	0	0	0	0	0	0	0	0	0	0	0	0	0	0	0	0.798454	0.51298	0.00345864	0.302102	0.0533412	0.951052	0.93462	0.0934503	0.867102	0.9068
2513020849	Bti_contig00025_ace.2	80440	RPL	AACGA	ACG	0	0	1	0	0	0	0	0	0	0	0	0	0	0	0	0	0	0	0	0	0.543307	0	0	0	0	0	0	0	0.185016	0.757533	0.446081	0.769946	0.879435	0.936952	0.93462	0.58656	0.908958	0.996797
2513020849	Bti_contig00025_ace.2	98229	DEL	GT	G	1	1	1	1	1	1	1	1	1	1	1	1	1	1	1	1	1	1	1	1	1	1	1	1	1	1	1	1	NA	NA	0.214882	0.76377	0.972663	NA	NA	0.459143	0.908958	0.996797
2513020849	Bti_contig00025_ace.2	116877	DEL	GA	G	1	1	1	1	1	1	1	1	1	1	1	1	1	1	1	1	1	1	1	1	1	1	1	1	1	1	1	1	NA	NA	0.214882	0.76377	0.972663	NA	NA	0.459143	0.908958	0.996797
2513020849	Bti_contig00025_ace.2	124544	INS	G	GA	0.808036	0.888889	1	0.855799	0.861386	0.904	0.885714	0.749064	0.86911	0.901919	0.877712	0.864407	0.900524	0.856354	0.896203	0.875817	0.866142	0.847953	0.886747	0.876786	0.874494	0.875325	0.871102	0.898305	0.886256	0.834928	0.911074	0.896855	0.788876	0.657353	0.255137	0.787808	0.977278	0.951052	0.93462	0.465922	0.908958	0.996797
2513020849	Bti_contig00025_ace.2	155424	INS	C	CA	0.875	0.920962	1	0.931116	0.979021	0.894428	0.911007	0.868966	0.862843	0.892794	0.929889	0.940618	0.904988	0.925926	0.905747	0.915572	0.919643	0.911051	0.887872	0.900593	0.912975	0.88326	0.93646	0.935764	0.924528	0.92132	0.933252	0.929119	0.539777	0.245966	0.226854	0.743631	0.98237	0.951052	0.93462	0.459143	0.908958	0.996797
2513020849	Bti_contig00025_ace.2	160171	INS	C	CT	0.845494	0.744027	0.846154	0.829146	0.754237	0.842294	0.843038	0	0.884106	NA	0.892784	0.933673	0.900256	0.899471	0.889535	0.890909	0.893281	0.9	0.904523	0.895437	0.906318	0.895787	0.909774	0.875776	0.898734	0.863222	0.867756	0.877249	0.707215	0.515309	0.663845	0.507446	0.843266	0.951052	0.93462	0.770388	0.908958	0.996797
2513020849	Bti_contig00025_ace.2	367587	RPL	CTATTTATG	CATTTATGA,CATTTATG	0	0	1	NA	0	0	0	0	0	0	0	0	1	0	0	0	0	0	0	0	0	0	0	0	1	1	0.965409	0	0.758549	0.00088317	0.511705	0.0332928	0.847088	0.951052	0.310876	0.643481	0.623885	0.996797
2513020849	Bti_contig00025_ace.2	367587	RPL	CTATTTATG	CATTTATGA	0	0	0	NA	0	0	0	0	0	0	1	1	0	1	0	0	0	0	0	0	0	1	1	0	0	0	0	0.957071	0.112732	0.986157	0.572971	0.0460932	0.0625134	0.936952	0.995667	0.70175	0.623885	0.920428
2513020849	Bti_contig00025_ace.2	399554	DEL	TA	T	0.958763	0.954198	0	0.948718	1	0.918367	0.976744	0.962963	0.952255	0.916817	0.92562	0.957447	0.915014	0.974522	0.930851	0.965087	0.938824	0.95625	0.958209	0.92827	0	0.925287	0.931034	0.932735	0.950495	0.951724	0	0.966154	0.191113	0.800659	0.0713603	0.560017	0.964183	0.936952	0.93462	0.319422	0.908958	0.996797
2513020849	Bti_contig00025_ace.2	421887	RPL	AACTAAAAAACCTTTA	ACAAAAAACCTT	NA	NA	0	NA	NA	NA	NA	NA	NA	NA	NA	NA	NA	NA	NA	NA	NA	NA	NA	NA	NA	NA	NA	NA	NA	NA	0.980119	NA	NA	NA	NA	NA	NA	NA	NA	NA	NA	NA
2513020849	Bti_contig00025_ace.2	422011	INS	T	TA	0.945833	0.893701	0	0.966019	0	0.906452	0.890411	0.832765	0.877419	0.889391	0.883495	0.907104	0.873239	0.903315	0.910326	0.912821	0.913953	0.898361	0.850746	0.882845	0.906694	0.936937	0.896552	0.923645	0.866171	0.881029	0.921459	0.905202	0.846392	0.713219	0.478916	0.790574	0.987911	0.953572	0.93462	0.610416	0.908958	0.996797
2513020849	Bti_contig00025_ace.2	487961	DEL	GT	G	1	1	1	1	1	1	1	1	1	1	1	1	1	1	0.99511	1	1	1	1	1	1	1	1	1	0.993031	1	0.997085	1	0.07917	0.543483	0.212799	0.766667	0.973578	0.936952	0.93462	0.459143	0.908958	0.996797
2513020849	Bti_contig00025_ace.2	526029	DEL	CT	C	0.926421	0.927273	1	0.910053	0.883959	0.924855	0.914894	0.944099	0.919431	0.924269	0.943609	0.921839	0.947368	0.948718	0.936306	0.912351	0.931707	0.941441	0.935622	0.915994	0.904615	0.905172	0.916795	0.924915	0.907781	0.912844	0.943423	0.951595	0.666193	0.171925	0.211895	0.764173	0.979285	0.951052	0.93462	0.459143	0.908958	0.996797
2513020849	Bti_contig00025_ace.2	541692	INS	T	TA	0.883459	0.91954	1	0.922078	0.942529	0.855422	0.898148	0.935185	0.919732	0.892135	0.915888	0.88491	0.903153	0.899123	0.884091	0.917722	0.909962	0.929619	0.915179	0.919658	0.910806	0.864924	0.902367	0.875	0.884498	0.877108	0.899422	0.902857	0.886541	0.442095	0.201894	0.751115	0.967059	0.970972	0.93462	0.459143	0.908958	0.996797
2513020849	Bti_contig00025_ace.2	554639	RPL	GGAAGTC	GAAGT	NA	1	1	1	1	0.923358	NA	NA	0.996743	0.993274	NA	NA	NA	0.993958	NA	NA	NA	NA	NA	NA	NA	NA	NA	NA	0.990566	NA	0.891344	0.854817	0.70231	0.795915	0.0142568	0.0930202	0.187334	0.951052	0.93462	0.114847	0.623885	0.996797
2513020849	Bti_contig00025_ace.2	604111	DEL	GT	G	0.957597	0.956364	1	0.96034	0.9375	0.962963	0.926531	0.95625	0.934177	0.973941	0.944853	0.952381	0.973274	0.95283	0.946939	0.952941	0.944348	0.952494	0.925439	0.96036	0.95	0.933333	0.951613	0.948624	0.95679	0.954315	0.952381	0.962382	0.681598	0.121199	0.207454	0.764334	0.972535	0.951052	0.93462	0.459143	0.908958	0.996797
2513020849	Bti_contig00025_ace.2	692856	DEL	CT	C	1	1	1	1	1	1	1	1	1	1	1	1	1	1	1	1	1	1	1	1	1	1	1	1	1	1	1	1	NA	NA	0.214882	0.76377	0.972663	NA	NA	0.459143	0.908958	0.996797
2513020849	Bti_contig00025_ace.2	706908	DUP	CTCATCAGCTTGGCGTTTT..TTGTTGTTTACGAGCTTGT	CTCATCAGCTTGGCGTTTT..TTGTTGTTTACGAGCTTGT	0	NA	0	NA	NA	0.0416667	0.129794	NA	NA	NA	0	0	0	0.0856164	0	0	0	0	0	0	0	0	0	0	0	0	0	0	0.368667	0.575918	0.0118867	0.436684	0.13636	0.936952	0.93462	0.114847	0.908958	0.962237
2513020849	Bti_contig00025_ace.2	706908	DUP	CTCATCAGCTTGGCGTTTT..TTGTTGTTTACGAGCTTGT	CTCATCAGCTTGGCGTTTT..TTGTTGTTTACGAGCTTGT	0	NA	0.608696	NA	NA	0.0124481	0	NA	NA	NA	0	0	0	0	0	0	0	0	0	0	0	0	0	0	0	0.109541	0	0	0.312039	0.266637	0.6824	0.627711	0.754457	0.936952	0.93462	0.787063	0.908958	0.996797
2513020849	Bti_contig00025_ace.2	709779	INS	T	TA	0.882979	0.833333	1	0.890625	0.850932	0.870861	0.871036	0.849582	0.865	0.865314	0.852336	0.846827	0.867532	0.892601	0.865385	0.871287	0.862712	0.868421	0.865385	0.869219	0.837359	0.868852	0.897991	0.880218	0.925081	0.924157	0.901028	0.881474	0.538191	0.185655	0.25408	0.771874	0.964067	0.951052	0.93462	0.465922	0.908958	0.996797
2513020849	Bti_contig00025_ace.2	749672	DEL	GA	G	1	1	1	1	1	1	1	1	1	1	1	1	1	1	1	1	1	1	1	1	1	1	1	1	1	1	1	0	0.47386	0.698222	0.108293	0.149618	0.702999	0.936952	0.93462	0.395323	0.625073	0.996797
2513020849	Bti_contig00025_ace.2	777272	DEL	CT	C	0.965066	0.975207	1	1	0.85022	0.960526	0.954774	0.955056	0.969512	0.959732	0.962656	0.944751	0.961433	0.952128	0.954023	0.967667	0.975855	0.987654	0.967828	0.948624	0.96319	0.949367	0.984991	0.966102	0.973684	0.963636	0.964706	0.974566	0.894356	0.613086	0.243796	0.761182	0.972318	0.970972	0.93462	0.465922	0.908958	0.996797
2513020849	Bti_contig00025_ace.2	779994	RPL	AATA	AT	0	0	0	1	1	0.574118	0	1	0	1	1	0	1	1	1	0.539755	1	0.996622	1	0.590848	0	1	1	0.561453	1	0	0	0.853121	0.684699	0.19588	0.832211	0.968202	0.337183	0.951052	0.93462	0.888533	0.97662	0.996797
2513020849	Bti_contig00025_ace.2	792491	DEL	TA	T	0.938865	0.873016	1	0.894737	0	0	0.857143	0.918367	0.901961	0.9022	0.902072	0.900862	0.91133	0.873536	0.870246	0.900901	0.919386	0.906849	0.913462	0.870647	0.863946	0.914081	0.884692	0.906067	0.864198	0.93038	0.95422	0.932914	0.667537	0.814278	0.796025	0.730233	0.938829	0.951052	0.93462	0.875162	0.908958	0.996797
2513020849	Bti_contig00025_ace.2	801109	DEL	AT	A	0.969388	0.942308	1	0.990868	0	0	0	0.931915	0	NA	0.946067	0.955272	0.934066	0.949861	0.968652	0.965	0.94702	0.981424	0.97151	0	0	0.942708	0.952484	0.941573	0.978182	0.980132	0.9509	0.959572	0.980768	0.229534	0.904197	0.104158	0.541936	0.994152	0.93462	0.931447	0.623885	0.996797
2513020849	Bti_contig00025_ace.2	835026	INS	G	GA	0.00892857	0.0626632	0	NA	0.0601719	0.0252101	0.0444162	0.0359168	0.0273973	0.0273523	0	0	0	0	0	0	0	0	0	0	0	0	0	0	0	0	0	0	0.515653	0.364703	5.61885e-05	0.0782169	0.00579349	0.951052	0.93462	0.00799051	0.623885	0.292945
2513020849	Bti_contig00025_ace.2	912899	INS	T	TA	0	NA	NA	NA	0	NA	NA	NA	NA	NA	0.902	0.898551	0.91623	0.885167	0.904639	0.904872	0.908142	0.929619	0.92439	0	0.89876	0.932796	0.906	0.909692	0.905512	0.885621	0.920133	0.919355	0.513861	0.591293	0.609375	0.41403	0.297905	0.951052	0.93462	0.727381	0.908958	0.996797
2513020849	Bti_contig00025_ace.2	939543	DEL	TA	T	0	NA	NA	0	1	NA	0	NA	0	0	1	1	1	0	0	1	1	0	0	0	0	1	0	1	1	0	1	1	0.228895	0.306866	0.981011	0.25503	0.586529	0.936952	0.93462	0.986257	0.812638	0.996797
2513020849	Bti_contig00025_ace.2	962082	INS	A	AT	0.897436	0	1	0	1	NA	0	0	0	0	0.893462	0.889881	0.870091	0.920635	0.878689	0	0.909326	0.87234	0.9	0	0	0.864458	0.880899	0.884712	0.863636	0.842466	0.880911	0.920424	0.961245	0.0270587	0.588225	0.0890467	0.332157	0.989188	0.93462	0.71346	0.623885	0.996797
2513020849	Bti_contig00025_ace.2	972288	DEL	AT	A	0.965517	0.917355	1	0	1	0.978947	0.952255	0.978261	0.946844	0.928934	0.949541	0.945946	0.961853	0.961111	0.970674	0.938534	0.963964	0.975155	0.943299	0	0	0.944444	0	0.956332	0.980066	0.981366	0.962963	0.983412	0.420911	0.215827	0.121577	0.381059	0.677703	0.936952	0.93462	0.416569	0.908958	0.996797
2513020849	Bti_contig00025_ace.2	972477	INS	CCAACGGGAGCAACAGGTC..GAACAACGGGAGCAACAGG	CCAACGGGAGCAACAGGTC..GAACAACGGGAGCAACAGG	NA	0	0.333333	0	NA	0	0	0	0.192593	0.177489	0	0	0	0	0	0	0	0	0	0	0	0	0	0	0	0.213768	0	0	0.226971	0.789576	0.374306	0.508254	0.0738311	0.936952	0.93462	0.5455	0.908958	0.920428
2513020849	Bti_contig00025_ace.2	999095	DEL	AT	A	0.947368	0.963746	1	0.954286	1	0.927492	0.927667	0.974441	0.908861	0.938849	0.937132	0.941176	0.94695	0.92809	0.915691	0.927273	0.92446	0.941176	0.920988	0.925926	0.901328	0.951691	0.949324	0.927083	0.944099	0.920844	0.947781	0.952206	0.470246	0.828335	0.18665	0.765232	0.959839	0.936952	0.93462	0.459143	0.908958	0.996797
2513020849	Bti_contig00025_ace.2	1068911	DEL	AT	A	0.983806	0.967213	1	0.833333	1	0.955882	0.969543	0.953668	0.981424	0.991304	0.978858	0.983651	0.95664	0.978378	0.983607	0.981395	0.982759	0.950464	0.977401	0	0	0.979695	0.984314	0.96008	1	0.970674	0.960432	0.97294	0.378257	0.617754	0.0864325	0.614491	0.848193	0.936952	0.93462	0.352064	0.908958	0.996797
2513020849	Bti_contig00025_ace.2	1119885	DEL	CT	C	0	0.919643	1	0.714286	0	0	0	0.824	0.862259	0.894309	0.911422	0.88835	0.922438	0.936963	0.85119	0.853904	0.909836	0.922807	0.876543	0	0	0.890578	0.867257	0.933649	0	0.896104	0	0	0.230591	0.647291	0.381237	0.580518	0.0777872	0.936952	0.93462	0.553456	0.908958	0.92644
2513020849	Bti_contig00025_ace.2	1140199	DEL	CA	C	0	1	1	0	1	1	0.989744	1	1	1	1	1	1	1	1	1	1	1	1	0	0	1	1	1	1	1	1	0.997114	0.0455119	0.343144	0.39501	0.697237	0.497264	0.936952	0.93462	0.561297	0.908958	0.996797
2513020849	Bti_contig00025_ace.2	1158227	DEL	AT	A	0.95098	1	1	0.984496	0.912727	0.976923	0.911538	0.932773	0.925926	0.94955	0.948718	0.960227	0.959654	0.907357	0.95977	0.961853	0.967816	0.96732	0.942363	0.949791	0.927107	0.943925	0.940594	0.937173	0.944223	0.924915	0.965338	0.959184	0.445872	0.648018	0.217594	0.704279	0.962139	0.936952	0.93462	0.459143	0.908958	0.996797
2513020849	Bti_contig00025_ace.2	1158631	DEL	GT	G	1	1	1	1	1	1	1	1	1	1	1	1	1	1	1	1	1	1	1	0	1	1	1	0.995893	1	1	1	1	0.851217	0.774116	0.132034	0.750466	0.924638	0.953572	0.93462	0.420465	0.908958	0.996797
2513020849	Bti_contig00025_ace.2	1182070	DEL	GT	G	NA	NA	1	1	0	NA	0	NA	0	NA	0	0	0	0	0	0	0	0	0	NA	0	0	0	0	0	1	0	0	0.930976	0.842863	0.647034	0.772485	0.301566	0.980849	0.938885	0.757897	0.908958	0.996797
2513020849	Bti_contig00025_ace.2	1194583	DEL	CA	C	0.953052	0.724138	NA	0.912281	0.745098	NA	0.930481	NA	0.886076	0.903061	0.903766	0.938462	0.911458	0.883289	0.916667	0.891089	0.883576	0.858357	0.920455	0.914807	0.897233	0.943662	0.926724	0.894949	0.895582	0.907692	0.909408	0.932039	0.380768	0.565953	0.360503	0.798011	0.996314	0.936952	0.93462	0.529488	0.908958	0.996797
2513020849	Bti_contig00025_ace.2	1195555	DEL	AT	A	0	0	1	0	1	0	0	0	0	0	0	0	0	0	0	0	0	0	0	0	0	0	0	0	0	0	0	0	0.807279	0.803083	0.297169	0.871941	0.700825	0.951052	0.93462	0.465922	0.910694	0.996797
2513020849	Bti_contig00025_ace.2	1195626	DEL	TA	T	0	0	0	1	1	0	0	0	0	0	0	0	0	1	0	0	0	0	0	0	0	0	0	0	1	0	1	1	0.95174	0.317475	0.662861	0.00615884	0.578097	0.987693	0.93462	0.770388	0.289466	0.996797
2513020849	Bti_contig00025_ace.2	1200808	DEL	AGC	A	0	0	0	0	0.0521327	0	0	0	0	0	0	0	0	0	0	0	0	0	0	0	0	0	0	0	0	0	0	0	0.807279	0.803083	0.297169	0.871941	0.700825	0.951052	0.93462	0.465922	0.910694	0.996797
2513020849	Bti_contig00025_ace.2	1212302	INS	C	CT	NA	NA	0	NA	NA	NA	0	0	0	0	0.888298	0.901695	0	0.920792	0	0	0	0	0	0	NA	0	0	0	0	0.768072	0	0	0.407745	0.184607	0.0331492	0.048706	0.125062	0.936952	0.93462	0.190765	0.623885	0.962237
2513020849	Bti_contig00025_ace.2	1217634	DEL	AT	A	0.939394	0.930693	0	0.972222	NA	0.91129	0.927184	0.909774	0.891892	0.923261	0.930586	0.919799	0.939394	0.916201	0.913978	0.922374	0.940367	0.94152	0.941003	0	0.920335	0.89911	0.928571	0.940043	0.959839	0.91195	0.898089	0.927273	0.752779	0.722762	0.158551	0.728532	0.940637	0.951052	0.93462	0.459143	0.908958	0.996797
2513020849	Bti_contig00025_ace.2	1222679	DEL	TA	T	0	1	1	1	1	1	1	1	1	0.995465	1	0	1	0	0	0	0	0	0	0	0	0	0	0	0	1	0	1	0.22618	0.880153	7.29556e-05	0.402477	0.0127577	0.936952	0.953273	0.00799051	0.908958	0.477139
2513020849	Bti_contig00025_ace.2	1315269	DEL	TAA	T	0	0	0	0	0.0513595	0	0	0	0	0	0	0	0	0	0	0	0	0	0	0	0	0	0	0	0	0	0	0	0.807279	0.803083	0.297169	0.871941	0.700825	0.951052	0.93462	0.465922	0.910694	0.996797
2513020849	Bti_contig00025_ace.2	1359715	DEL	GT	G	0.84689	0.907407	1	1	0.919643	0.845161	0.902098	0.873563	0.90625	0.873518	0.890995	0.83815	0.867816	0.917404	0.859238	0.900524	0.851508	0.846154	0.907121	0	0	0.867868	0.898167	0.911548	0.926941	0.909091	0.902072	0.896138	0.42863	0.705616	0.0751324	0.628855	0.810206	0.936952	0.93462	0.324054	0.908958	0.996797
2513020849	Bti_contig00025_ace.2	1362432	DEL	CT	C	0.958678	0.922535	1	0.945619	0.927885	0.907975	0.920949	0.905882	0.963446	0.92233	0.962185	0.935657	0.945409	0.936	0.944162	0.921114	0.95186	0.946809	0.925926	0.949416	0.925926	0.959654	0.931777	0.965714	0.915709	0.934524	0.943958	0.953168	0.322158	0.831068	0.228346	0.766216	0.982904	0.936952	0.93462	0.459143	0.908958	0.996797
2513020849	Bti_contig00025_ace.2	1375024	DEL	TA	T	0	0	1	0.909091	NA	0	0.916449	0.895582	0.947541	0.957547	0.94359	0.954693	0.925072	0.950156	0	0.945504	0.936508	0	0	0	0	0.91875	0.968889	0.97037	0.899497	0	0	0	0.0629159	0.806226	0.0486243	0.695486	0.16737	0.936952	0.93462	0.240562	0.908958	0.996797
2513020849	Bti_contig00025_ace.2	1382921	DEL	TA	T	1	1	NA	1	1	1	1	1	1	1	1	1	1	1	1	1	1	1	1	1	0	1	1	1	1	1	1	1	0.185016	0.757533	0.130677	0.672656	0.905069	0.936952	0.93462	0.420465	0.908958	0.996797
2513020849	Bti_contig00025_ace.2	1397610	DEL	CA	C	0	0	NA	1	0	0	0	0	1	1	1	1	1	1	0	1	1	1	1	0	0	1	0	1	1	1	1	1	0.267122	0.264388	0.887751	0.146578	0.454981	0.936952	0.93462	0.919543	0.623885	0.996797
2513020849	Bti_contig00025_ace.2	1399727	DEL	TA	T	0.941909	0.934694	1	0.894309	1	0.967871	0.921569	0.950877	0.952542	0.916279	0.921225	0.94898	0.935961	0.967123	0.927885	0.946602	0.93674	0.944272	0.909814	0.915966	0.944681	0.918478	0.924453	0.923937	0.954545	0.889197	0.944984	0.935791	0.786792	0.618042	0.188813	0.762614	0.973458	0.951052	0.93462	0.459143	0.908958	0.996797
2513020849	Bti_contig00025_ace.2	1399936	DEL	CA	C	0.932692	0.941423	1	0.9631	0.971671	0.925234	0.924217	0.944444	0.903553	0.928952	0.934545	0.877895	0.903002	0.935	0.869159	0.909483	0.933921	0.902141	0.894977	0.900172	0.924303	0.914141	0.938959	0.949904	0.955272	0.926136	0.930939	0.947769	0.170423	0.595811	0.197936	0.80273	0.948588	0.936952	0.93462	0.459143	0.908958	0.996797
2513020849	Bti_contig00025_ace.2	1407079	DEL	TA	T	NA	NA	1	NA	0	NA	0	NA	NA	NA	0.962877	0.97093	0.967427	0.94302	0.975155	0.970588	0.936893	0.96587	0.955556	0	0.93913	0.954693	0	0.9375	0.950207	0.966555	0.942373	0.942515	0.581516	0.2941	0.810737	0.121404	0.409762	0.951052	0.93462	0.881033	0.623885	0.996797
2513020849	Bti_contig00025_ace.2	1428279	INS	G	GA	0.938776	0	1	0.92278	0.879828	0.908333	0.929612	0.861017	0.96633	0.944862	0.943355	0.922222	0.953623	0.945946	0.937337	0.963989	0.928899	0.926174	0.942029	0	0	0.944606	0.935849	0.944186	0.902527	0.939597	0.931438	0.95375	0.83181	0.726232	0.220288	0.72569	0.736021	0.953572	0.93462	0.459143	0.908958	0.996797
2513020849	Bti_contig00025_ace.2	1428377	DEL	TA	T	0	1	1	1	1	1	0.994667	1	1	0	1	1	1	1	1	1	1	1	1	0	0	1	0	1	1	1	1	1	0.422893	0.376075	0.257664	0.296651	0.852085	0.936952	0.93462	0.465922	0.863074	0.996797
2513020849	Bti_contig00025_ace.2	1433979	DEL	AT	A	NA	0	NA	0	NA	0	NA	NA	NA	NA	0	0	0	0	0	0	0	0	0	0	NA	0	NA	0	0	0.906977	NA	0	0.328186	0.324683	0.544329	0.551165	0.810906	0.936952	0.93462	0.673249	0.908958	0.996797
2513020849	Bti_contig00025_ace.2	1434345	DUP	ATTTTTAAGGAGCAATACC..CACATTCAAACTATTATGG	ATTTTTAAGGAGCAATACC..CACATTCAAACTATTATGG	0.117949	0	0	NA	NA	NA	0	NA	0.127273	NA	0.132554	0.13494	0.137363	0.127596	0.118734	0.107981	0.135135	0.143678	0.146988	0.155722	0.161157	0.148515	0.132353	0.140625	0.160156	0.165698	0.133212	0.137022	0.545528	0.515232	0.541775	0.657474	0.599722	0.951052	0.93462	0.672301	0.908958	0.996797
2513020849	Bti_contig00025_ace.2	1434350	DUP	TAAGGAGCAATACCTTCAT..CTTTTCTAAATAACTTTTA	TAAGGAGCAATACCTTCAT..CTTTTCTAAATAACTTTTA	0	0.261682	0	0	0	0	0	0	0.311856	0	NA	0.047486	0.059375	0.0643087	0.0520231	0.0462725	0.0315315	0.0365449	0.254613	0	0	0.0603448	0.0392562	NA	0.0232558	0.0388693	0.252414	0.0428994	0.85446	0.361214	0.874783	0.883487	0.914811	0.953572	0.93462	0.908615	0.917638	0.996797
2513020849	Bti_contig00025_ace.2	1434350	DUP	TAAGGAGCAATACCTTCAT..CTTTTCTAAATAACTTTTA	TAAGGAGCAATACCTTCAT..CTTTTCTAAATAACTTTTA	0.234615	0	0	0	0	0.270677	0.241546	0.284519	0	0.230047	NA	0.220859	0.248889	0.265217	0.296435	0.255773	0.277372	0.292017	0	0.251885	0.265372	0.293333	0.253968	NA	0.28483	0.265403	0	0.257515	0.36973	0.153121	0.691423	0.90996	0.334654	0.936952	0.93462	0.790198	0.932864	0.996797
2513020849	Bti_contig00025_ace.2	1452124	DEL	CT	C	0.964664	1	1	0.94636	0.9631	0.986441	0.918864	0.940476	0.959391	0.963816	0.960177	0.953125	0.949686	0.944598	0.945504	0.950249	0.954918	0.947522	0.962264	0.962422	0.962422	0.973958	0.959016	0.964602	0.965517	0.980831	0.966216	0.959294	0.570998	0.829002	0.222143	0.758065	0.966094	0.951052	0.93462	0.459143	0.908958	0.996797
2513020849	Bti_contig00025_ace.2	1452833	DEL	AT	A	0	0	0	0	0.0503876	0	0	0	0	0	0	0	0	0	0	0	0	0	0	0	0	0	0	0	0	0	0	0	0.807279	0.803083	0.297169	0.871941	0.700825	0.951052	0.93462	0.465922	0.910694	0.996797
2513020849	Bti_contig00025_ace.2	1481335	DEL	AT	A	0	0	1	1	1	1	1	1	1	1	1	1	1	1	1	1	1	1	1	0	0	0.993631	0	1	1	0	1	1	0.917565	0.899027	0.158741	0.782117	0.285102	0.978368	0.96481	0.459143	0.908958	0.996797
2513020849	Bti_contig00025_ace.2	1486091	DEL	GT	G	0	1	1	1	1	0	1	1	1	1	1	1	1	1	0	1	0	1	0.99375	0	0	0	1	1	0	1	0	0	0.215658	0.952621	0.0130462	0.856038	0.528805	0.936952	0.984019	0.114847	0.910694	0.996797
2513020849	Bti_contig00025_ace.2	1506900	DEL	TA	T	0.961905	0	1	0	0.942149	0.935943	0.947137	0.964912	0.966777	0.930283	0.951435	0.9599	0.975684	0.954545	0.9375	0	0.923251	0.899329	0.953488	0	0	0.954545	0.935622	0.976424	0.969582	0.987382	0	0.955923	0.41762	0.260174	0.170566	0.885911	0.73543	0.936952	0.93462	0.459143	0.917638	0.996797
2513020849	Bti_contig00025_ace.2	1529553	DEL	GT	G	0	0	1	1	NA	NA	0	0	0	0	0.872861	0.88172	0.892045	0.90566	0.888545	0.872832	0.883905	0	0.83871	0	0.923077	0.867868	0	0.877273	0.868313	0.870968	0.878049	0.897304	0.305941	0.0799461	0.439875	0.0622969	0.388375	0.936952	0.93462	0.586499	0.623885	0.996797
2513020849	Bti_contig00025_ace.2	1541014	DEL	AT	A	0	0.989899	1	1	1	0	0	0.992157	1	1	1	1	1	1	1	0.994667	1	1	0	0	0	1	0	1	0	1	0	0	0.10615	0.425839	0.0631875	0.492547	0.243256	0.936952	0.93462	0.296981	0.908958	0.996797
2513020849	Bti_contig00025_ace.2	1544092	DEL	TA	T	1	1	1	1	1	1	1	1	1	1	1	1	1	1	1	1	1	1	1	0	1	1	1	1	1	1	1	1	0.854294	0.77525	0.13249	0.752063	0.925186	0.953572	0.93462	0.420465	0.908958	0.996797
2513020850	Bti_abtiwPMp198_bti563.3	3819	INS	T	TA	0.857143	0	0	0	NA	0.83	0	0	0	0.912121	0.887665	0.904372	0.926829	0.905199	0.909091	0.926174	0.91133	0.86014	0.920792	0.91314	0.904177	0.904459	0.942029	0.913386	0.943396	0.900685	0.944238	0.942857	0.53403	0.0752691	0.240835	0.363677	0.386736	0.951052	0.93462	0.465922	0.908958	0.996797
2513020850	Bti_abtiwPMp198_bti563.3	15575	INS	T	TA	0.960265	0.978142	0.891892	0.967742	1	0.978022	0.976827	0.976293	0.959233	0.951586	0.932976	0.964052	0.939474	0.95	0.967662	0.954054	0.961771	0.934911	0.955844	0.95302	0.954217	0.97076	0.951064	0.953252	0.980066	0.962209	0.976253	0.958071	0.598963	0.390284	0.204879	0.761221	0.949896	0.951052	0.93462	0.459143	0.908958	0.996797
2513020850	Bti_abtiwPMp198_bti563.3	53110	DEL	CA	C	1	1	1	1	0	1	0.993548	1	1	0.994366	1	0.993921	1	1	0.994152	1	1	1	1	1	0.995789	1	1	0.995708	1	1	0.996441	1	0.797591	0.812576	0.468391	0.808484	0.964756	0.951052	0.93462	0.599235	0.908958	0.996797
2513020850	Bti_abtiwPMp198_bti563.3	64086	INS	A	AT	0.874477	0.908197	1	0.827189	0.869707	0.901538	0.884547	0.853521	0.865429	0.838499	0.838129	0.857471	0.865385	0.850356	0.826923	0.866667	0.882479	0.922252	0.868421	0.886054	0.878092	0.917275	0.899489	0.880995	0.901639	0.844068	0.864066	0.873723	0.141412	0.862496	0.254401	0.777926	0.974958	0.936952	0.94322	0.465922	0.908958	0.996797
2513020850	Bti_abtiwPMp198_bti563.3	83738	DEL	AC	A	0.933333	0.941176	1	0.912351	0.99373	0.971963	0.948718	0.971014	0.950226	0.975194	0.952118	0.93819	0.962353	0.948235	0.98995	0.955912	0.953757	0.98939	0.955	0.959528	0.960503	0.935205	0.951973	0.947858	0.954839	0.960227	0.96037	0.952381	0.628142	0.40899	0.226748	0.765117	0.957062	0.951052	0.93462	0.459143	0.908958	0.996797
2513020850	Bti_abtiwPMp198_bti563.3	124616	DEL	GA	G	1	1	1	1	1	1	1	1	1	1	1	1	1	1	1	1	1	1	1	1	1	1	1	1	1	1	1	1	NA	NA	0.214882	0.76377	0.972663	NA	NA	0.459143	0.908958	0.996797
2513020850	Bti_abtiwPMp198_bti563.3	165424	DEL	TA	T	0.88785	0.841667	0.294118	0.758333	0	0.821862	0.895349	0.925311	0.837134	0.863208	0.842324	0.874346	0.826303	0.886139	0.850242	0.84897	0.873267	0.862464	0.880597	0.851979	0.848544	0.832976	0.891473	0.848429	0.836299	0.875354	0.848214	0.866508	0.702041	0.824449	0.480662	0.835465	0.944161	0.951052	0.93462	0.61057	0.910694	0.996797
2513020850	Bti_abtiwPMp198_bti563.3	178133	RPL	TACTTTACCTGTATGGCTAG	TTACTTTACCTGTATGGCT..CTTTACCCGTATGGCTAGA	0	1	0	1	1	1	0.822086	0	0.545254	0.410224	0.404145	0.578431	0.449315	0.683019	0	0.434555	0.457467	0.389027	0	0	0.528117	0	0.508368	0.613497	0	0	0	0	0.390445	0.932262	0.00171212	0.420159	0.793423	0.936952	0.977792	0.0804695	0.908958	0.996797
2513020850	Bti_abtiwPMp198_bti563.3	180544	DEL	CA	C	0.920792	0.875862	1	0.946768	1	0.920998	0.926335	0.949474	0.926923	0.908745	0.917137	0.927184	0.923077	0.897674	0.925156	0.965591	0.954459	0.958225	0.941176	0.914286	0.908571	0.91762	0.934028	0.934142	0.981763	0.909333	0.967742	0.95569	0.415034	0.645047	0.248446	0.756683	0.943737	0.936952	0.93462	0.465922	0.908958	0.996797
2513020850	Bti_abtiwPMp198_bti563.3	248505	DEL	CT	C	0.900901	0.88601	NA	1	NA	0.881818	0.914773	0.831579	0.933086	0.903323	0.870504	0.89071	0.943005	0.897849	0.947214	0.92268	0.929515	0.890034	0.930108	0.916667	0.887446	0.95288	0.924752	0.842466	0.9631	0.884498	0.938879	0.931193	0.139932	0.97789	0.283914	0.735846	0.965028	0.936952	0.994848	0.465922	0.908958	0.996797
2513020850	Bti_abtiwPMp198_bti563.3	248592	DEL	CT	C	1	0	1	1	1	1	1	1	1	1	1	1	1	1	1	1	1	1	1	1	1	1	1	1	1	1	1	1	0.396734	0.989289	0.466459	0.9597	0.75388	0.936952	0.995667	0.599235	0.972634	0.996797
2513020850	Bti_abtiwPMp198_bti563.3	250490	DEL	TA	T	1	1	1	1	1	1	1	1	1	1	1	1	1	1	1	1	1	1	1	1	1	1	1	1	1	1	1	0.997118	0.47386	0.698222	0.21444	0.762626	0.973001	0.936952	0.93462	0.459143	0.908958	0.996797
2513020850	Bti_abtiwPMp198_bti563.3	268899	DEL	TA	T	1	1	1	1	1	1	1	1	1	1	1	1	1	1	1	1	1	1	1	1	1	1	1	1	1	1	1	1	NA	NA	0.214882	0.76377	0.972663	NA	NA	0.459143	0.908958	0.996797
2513020850	Bti_abtiwPMp198_bti563.3	311355	DEL	TA	T	0	0	0	0	0.0599078	0	0	0	0	0	0	0	0	0	0	0	0	0	0	0	0	0	0	0	0	0	0	0	0.807279	0.803083	0.297169	0.871941	0.700825	0.951052	0.93462	0.465922	0.910694	0.996797
2513020850	Bti_abtiwPMp198_bti563.3	317124	DEL	CA	C	1	1	NA	1	1	1	1	1	1	1	1	1	1	1	1	1	1	1	1	1	1	1	1	1	1	1	1	1	NA	NA	0.214882	0.76377	0.972663	NA	NA	0.459143	0.908958	0.996797
2513020851	Bti_contig00024_ace.4	52056	DEL	GT	G	1	1	NA	1	0	1	1	1	1	1	1	1	1	1	1	1	1	1	1	1	1	1	0.996599	1	1	1	1	1	0.809251	0.804907	0.466961	0.809615	0.963723	0.951052	0.93462	0.599235	0.908958	0.996797
2513020851	Bti_contig00024_ace.4	67248	INS	C	CTTTATTTTTAATGTCTAT	0.0546697	0.0422222	0	0.0644391	0.0688705	0.0504032	0.0318665	0.0709677	0.034076	0.034632	0	0	0	0	0	0	0	0	0	0	0.394915	0	0.115897	0	0	0	0.00550964	0.00994695	0.218832	0.338092	0.868576	0.369755	0.793918	0.936952	0.93462	0.906819	0.908958	0.996797
2513020851	Bti_contig00024_ace.4	182452	INS	T	TA	0.87108	0.849398	1	0.868715	0.892473	0.911263	0.876607	0.885321	0.830028	0.903885	0.898734	0.872727	0.92328	0.880759	0.884058	0.847953	0.887179	0.880779	0.900844	0.891473	0.910924	0.87931	0.884793	0.870567	0.892989	0.844086	0.931953	0.890487	0.0944121	0.0575075	0.224978	0.785075	0.979552	0.936952	0.93462	0.459143	0.908958	0.996797
2513020851	Bti_contig00024_ace.4	233216	DEL	CT	C	1	1	1	1	1	1	1	1	1	1	1	1	1	1	1	1	1	1	1	1	1	1	1	1	1	1	1	1	NA	NA	0.214882	0.76377	0.972663	NA	NA	0.459143	0.908958	0.996797
2513020852	Bti_GWDALJX04I0LJH_51-405_fm319.5	785	DEL	CAT	C	0.0679282	0.0677701	0.0752427	0.0656234	0.0954027	0.0561532	0.0694263	0.052484	0.0554529	0.0797802	0.0662009	0.0696629	0.0664076	0.0462514	0.0650685	0.0613577	0.0533373	0.0481786	0.0589279	0.0793112	0.082066	0.0529085	0.0745067	0	0.0415248	0.0537634	0.0336527	0.0367606	0.108157	0.704009	0.0345001	0.213904	0.969476	0.936952	0.93462	0.190765	0.7522	0.996797
2513020852	Bti_GWDALJX04I0LJH_51-405_fm319.5	4439	INS	G	GC	0	NA	NA	NA	NA	0	0.0666667	NA	0	0	0	0	0	0	0	0	0	NA	0	0.00898204	0	NA	0	0	NA	NA	NA	NA	0.581064	0.718142	0.384763	0.640255	0.824719	0.951052	0.93462	0.554295	0.908958	0.996797
2513020852	Bti_GWDALJX04I0LJH_51-405_fm319.5	11612	DEL	CT	C	1	1	0	1	1	1	1	1	1	1	1	1	1	1	1	1	1	1	1	1	1	1	1	1	1	1	1	1	NA	NA	0.214882	0.76377	0.972663	NA	NA	0.459143	0.908958	0.996797
2513020852	Bti_GWDALJX04I0LJH_51-405_fm319.5	13362	RPL	TTCCTCTTC	TCCTCTT,TGCTCTC,TCCTCTC,TGCGCTC	0.97314	0.188519	1	0.968635	0.89039	0.405141	0.906918	0.963907	0.960073	0.973684	0.952599	0.96181	0.861039	0.95303	0.972678	0.948819	0.407463	0.957971	0.953064	0.958175	0.366717	0.824499	0.303641	0.854381	0.357143	0.971963	0.190095	0	0.409558	0.790126	0.0343871	0.191225	0.24693	0.936952	0.93462	0.190765	0.703446	0.996797
2513020852	Bti_GWDALJX04I0LJH_51-405_fm319.5	13364	RPL	CCTCT	CTC,CTT	0.57124	0.974026	1	0.770958	0.541687	1	0.322554	0.760463	1	1	1	0.977796	1	1	1	1	0.977749	0.999088	0.972393	0.957143	0.978176	1	0.990176	0.7277	0.378581	1	0	0	0.989356	0.688554	0.156586	0.0654396	0.0995603	0.994977	0.93462	0.459143	0.623885	0.92644
2513020852	Bti_GWDALJX04I0LJH_51-405_fm319.5	13379	INV	GCGCTTCATTTATTTCTCA..TGAGAAATAAATGAACGGG	GCCCGTTCATTTATTTCTC..TTGAGAAATAAATGAAGCG	0.171806	0	0	0	0	0	0.157895	0	0.259009	0	0.256604	0	0	0	0	0	0	0	0	0	0	0	0	0	0	0	0	0	0.680833	0.218839	0.0262066	0.809843	0.569902	0.951052	0.93462	0.15893	0.908958	0.996797
2513020852	Bti_GWDALJX04I0LJH_51-405_fm319.5	13626	RPL	TACTCATCGCGCTACCTGG..TCAAGTGTGCCGTGTATTG	TCCCCAGCGCGCTACCGGG..ATCAAGTGTGCCGTGTATT	0.0843373	0.0672646	0	0.09375	0.0444444	0.036036	0.060241	0.0537634	0.0363636	0.0588235	0.0222222	0.0406504	0.0406504	0.0423729	0.0645161	0.0752688	0.0787589	0.0974729	0.0563798	0.059081	0.100775	0.0666667	0.0913242	0.100629	0.0629371	0	0.0721311	0.0872483	0.386912	0.0796822	0.721093	0.690427	0.689436	0.936952	0.93462	0.809346	0.908958	0.996797
2513020852	Bti_GWDALJX04I0LJH_51-405_fm319.5	13630	RPL	CATCGCGCTACCTGGGAAC..TCAAGTGTGCCGTGTATTG	CCCCGCGCTCCCGGAAACC..ATCAAGTGTGCCGTGTATT	0.0625	0	0	0	0	0	0.0410959	0	0	0	0	0	0	0	0.0357143	0.0300429	0.03125	0.0384615	0.0471698	0	0	0.0358566	0.0459364	0.0705882	0	0	0.0299728	0.0334928	0.56433	0.227094	0.102496	0.66196	0.530701	0.951052	0.93462	0.381569	0.908958	0.996797
2513020852	Bti_GWDALJX04I0LJH_51-405_fm319.5	13631	RPL	ATCGCGCTACCTGGGAACC..TCAAGTGTGCCGTGTATTG	AGCGCGCTCCGGGGACCCG..ATCAAGTGTGCCGTGTATT	0	0.06	0	0	0	0	0.0441176	0	0	0	0	0	0	0.0754717	0.129252	0.08	0.135135	0.0746269	0.0689655	0.0367347	0.0673077	0.0805687	0.0996016	0.140845	0	0	0.0384615	0.0625	0.791017	0.858255	0.0152722	0.614625	0.296454	0.951052	0.94322	0.114847	0.908958	0.996797
2513020852	Bti_GWDALJX04I0LJH_51-405_fm319.5	13635	RPL	CGCTACCTGGGAACCGATA..AGTGTGCCGTGTATTGGGT	CTCTCCGGGGAACCGATAC..AAGTGTGCCGTGTATTGGT	0	0	0	0	0	0	0.0666667	0	0	0	0	0	0	0	0	0	0.0526316	0	0	0	0	0	0	0	0	0	0	0.0882353	0.26508	0.994491	0.71827	0.112927	0.218053	0.936952	0.995667	0.809149	0.623885	0.996797
2513020852	Bti_GWDALJX04I0LJH_51-405_fm319.5	13638	RPL	TACCTGGGAACCGATACTT..TCAAGTGTGCCGTGTATTG	TGCCGGGAACCGATACTTT..TCAAGTGTGCCGTGTATTG	0	0	0	0	0	0	0.521739	0	0	0	0.585366	0	0	0	0.742857	0	0	0.704918	0.654321	0	0	0	0	0	0	0	0	0	0.0430454	0.626013	0.718766	0.143416	0.680854	0.936952	0.93462	0.809149	0.623885	0.996797
2513020852	Bti_GWDALJX04I0LJH_51-405_fm319.5	13638	RPL	TACCTGGGAACCGATACTT..TCAAGTGTGCCGTGTATTG	TCCCGGGAACCGATACTTT..ATCAAGTGTGCCGTGTATT	0	0	0	0	0	0	0	0	0	0	0	0	0	0	0	0	0.755102	0	0	0	0	0.663551	0	0.863014	0	0	0.711864	0.729323	0.0655966	0.972208	0.0422604	0.109005	0.428664	0.936952	0.991934	0.223802	0.623885	0.996797
2513020852	Bti_GWDALJX04I0LJH_51-405_fm319.5	13638	RPL	TACCTGGGAACCGATACTT..TCAAGTGTGCCGTGTATTG	TGCCGGGAACCGATACTTT..ATCAAGTGTGCCGTGTATT	0	0	0	0	0	0	0	0	0	0	0	0	0	0	0	0	0	0	0	0	0	0	0.816514	0	0	0	0	0	0.446696	0.480327	0.434125	0.487432	0.668026	0.936952	0.93462	0.582968	0.908958	0.996797
2513020852	Bti_GWDALJX04I0LJH_51-405_fm319.5	13639	DEL	AC	A	1	1	0	1	1	1	1	1	1	1	1	1	1	1	1	1	1	1	1	1	1	1	1	1	1	1	1	1	NA	NA	0.214882	0.76377	0.972663	NA	NA	0.459143	0.908958	0.996797
2513020852	Bti_GWDALJX04I0LJH_51-405_fm319.5	13640	RPL	CCTGGGAACCGATACTTTC..TAATAGCCAAGCTACTTCG	CGGGGAACCGATACTTTCT..GAATAGCCAAGCTACTTCG	0	1	0	0	1	0.978947	0.984293	0	1	1	1	0	0	0	0	0	0	0	0	0	0	0	0	0	0	0	0	0	0.367404	0.410014	0.000289099	0.288396	0.106516	0.936952	0.93462	0.0181169	0.858679	0.92644
2513020852	Bti_GWDALJX04I0LJH_51-405_fm319.5	13640	RPL	CCTGGGAACCGATACTTTC..AGTGTGCCGTGTATTGGGT	CGGGGAACCGATACTTTCT..AATGTGCCGTGTATTGGGT	1	0	1	0.991228	0	0	0	1	0	0	0	1	1	1	1	1	1	1	1	0.974522	1	1	0.981013	1	0.980392	1	0.954984	0.992593	0.366842	0.404253	0.0982677	0.375365	0.418338	0.936952	0.93462	0.377027	0.908958	0.996797
2513020852	Bti_GWDALJX04I0LJH_51-405_fm319.5	13641	RPL	CTGGGAACCGATACTTTCT..TCAAGTGTGCCGTGTATTG	CGGGAACCGATACTTTCTG..TCAAAGGTGCCGTGTATTG	0	0	1	0	0	0	0	0	0	0	0	0	1	0	1	1	1	0	1	0.989761	0	1	0.986891	1	0.990909	1	0.97153	0	0.795347	0.236256	0.00391544	0.561724	0.382672	0.951052	0.93462	0.0934503	0.908958	0.996797
2513020852	Bti_GWDALJX04I0LJH_51-405_fm319.5	13641	DEL	CT	C	1	1	1	1	1	1	1	1	1	1	1	1	1	1	1	1	1	1	1	1	1	1	1	1	1	1	1	1	NA	NA	0.214882	0.76377	0.972663	NA	NA	0.459143	0.908958	0.996797
2513020852	Bti_GWDALJX04I0LJH_51-405_fm319.5	13641	RPL	CTGGGAACCGATACTTTCT..TCAAGTGTGCCGTGTATTG	CGGGAACCGATACTTTCTG..ATCAAGTGTGCCGTGTATT	1	1	0	0.993711	1	0.983471	0.989796	1	1	1	1	1	0	1	0	0	0	1	0	0	1	0	0	0	0	0	0	0.985751	0.798199	0.239615	4.36689e-05	0.910534	0.267215	0.951052	0.93462	0.00799051	0.932864	0.996797
2513020852	Bti_GWDALJX04I0LJH_51-405_fm319.5	13683	DEL	TG	T	1	1	1	0.996997	1	0.991736	0.996255	1	1	1	1	1	1	1	1	1	1	1	1	0.996918	1	1	0.997585	1	0.993443	1	0.995506	0.998332	0.716444	0.905341	0.21459	0.762567	0.974385	0.951052	0.968632	0.459143	0.908958	0.996797
2513020852	Bti_GWDALJX04I0LJH_51-405_fm319.5	13686	DEL	GT	G	1	1	0	0.993884	1	0.984496	0.993921	1	1	1	1	1	1	1	1	1	1	1	1	0.99511	1	1	0.995726	1	0.988636	1	0.992701	0.997234	0.666034	0.877892	0.214799	0.761879	0.975633	0.951052	0.953273	0.459143	0.908958	0.996797
2513020852	Bti_GWDALJX04I0LJH_51-405_fm319.5	13782	RPL	GAAC	GTC,GCC,GGC,GGT	0	0	0	0	0	0	0	0	0	0	0	0	0	0	0	0	0	0	0	0	0	0	0	0	0	0	0	0.118421	0.47386	0.698222	0.254544	0.000104905	0.0155597	0.936952	0.93462	0.465922	0.0131481	0.52903
2513020852	Bti_GWDALJX04I0LJH_51-405_fm319.5	13782	DEL	GA	G	1	1	1	1	1	1	1	1	1	1	1	1	1	1	1	1	1	1	1	1	1	1	1	1	1	1	1	1	NA	NA	0.214882	0.76377	0.972663	NA	NA	0.459143	0.908958	0.996797
2513020852	Bti_GWDALJX04I0LJH_51-405_fm319.5	13784	DEL	AC	A	0.971731	0.94773	0.884615	0.936255	0.94636	0.967089	0.952381	0.968858	0.888386	0.91945	0.962025	0.913043	0.932824	0.934641	0.916121	0.927765	0.941304	0.926136	0.951936	0.933659	0.945729	0.933673	0.951923	0.940171	0.947761	0.9375	0.951938	0.949552	0.528822	0.444375	0.210799	0.754785	0.963926	0.951052	0.93462	0.459143	0.908958	0.996797
2513020852	Bti_GWDALJX04I0LJH_51-405_fm319.5	14389	RPL	TAATGCAAAAATCAGGTATAGTTTCGGTTACACAGT	TGATACAAAAATCCGGTAT..TAGTTTCGGTTACACAGTA	0.0508662	0.0550509	0.0264706	0.0516946	0.059772	0.0526316	0.0592326	0.0434783	0.0530497	0	0.0578183	0.046571	0.0613134	0.0433121	0.0477341	0.0533817	0.0472855	0.0587662	0.0502709	0.0456503	0.0415981	0.0465554	0.0527125	0	0.0500491	0.0555768	0	0.0523928	0.712754	0.514962	0.118916	0.129376	0.958695	0.951052	0.93462	0.414002	0.623885	0.996797
2513020852	Bti_GWDALJX04I0LJH_51-405_fm319.5	15078	RPL	TCTAC	TTCTACA,TTCTAAA,TTCAACA	0.148848	0.171311	0.158333	0.118844	0.16451	0.153961	0.176056	0.175193	0.132066	0.145064	0.145095	0.129131	0.13316	0.145794	0.164865	0.153101	0.158607	0.159334	0.152395	0.130109	0.131396	0.148232	0.143949	0.166061	0.166574	0.131569	0.16806	0	0.615124	0.729243	0.141763	0.134703	0.785024	0.951052	0.93462	0.429861	0.623885	0.996797
2513020852	Bti_GWDALJX04I0LJH_51-405_fm319.5	16435	DEL	TCTCAAGGTATAGAA	T	0.143342	0.149546	0.112853	0.136601	0.194637	0.133897	0.141108	0.149413	0.146273	0.138611	0	0	0	0	0.114202	0	0.111159	0.120462	0.146823	0.107394	0.0999105	0.119074	0.128375	0.13006	0.139173	0.163436	NA	0	0.49518	0.184688	0.403205	0.0122535	0.0817081	0.947534	0.93462	0.561297	0.389926	0.92644
2513020852	Bti_GWDALJX04I0LJH_51-405_fm319.5	16696	RPL	TACTACAGTTTCAGTCACA..CGATTGTCTTCTTTTTTAA	TGCTGCAGTTTCAGTCACA..CGATTGTCTTCTTTTTTAA	0.0664873	0.0788288	0.0967033	0.0581725	0.0740857	0.0720131	0.0713893	0.0768421	0.0786904	0	0	0.063275	0.0665262	0.0769928	0	0.0659026	0.067766	0.0629392	0.0598315	0	0	0.0669993	0	0.0680426	0.0668221	0.0621782	0	0	0.319558	0.407326	0.0281149	0.384194	0.884128	0.936952	0.93462	0.167797	0.908958	0.996797
2513020852	Bti_GWDALJX04I0LJH_51-405_fm319.5	16874	RPL	TTTTTCCAGATTGCCATTC..TCTGTAATTTGTACAGGAG	TCTTTCCCGTTTGCCATTC..TCTGTAATTTGTACAGGGA	0.0232328	0.013269	0	0.0246259	0.0340112	0.0225209	0.0173035	0.0195455	0.0359107	0.0301591	0.0264745	0.0299426	0.0334805	0.0282949	0.0371389	0.034611	0.0486092	0.0484211	0.0417293	0.0343261	0.0230872	0.0502105	0.0320544	0.03222	0.0163456	0.0274899	0.0117569	0.0149228	0.982537	0.917542	0.947161	0.215575	0.240318	0.994152	0.975755	0.959926	0.7522	0.996797
2513020852	Bti_GWDALJX04I0LJH_51-405_fm319.5	17066	DEL	TCACATCGTTTGTACTTTC..AATAACGAAATTCCTCTAA	T	0.0868655	0.0402378	0.0778098	0.0808771	0.138572	0.0748811	0.0951471	0.0882353	0.0831252	0.0653188	0.0721942	0.0738007	0.0660981	0.0733453	0.066459	0.0696532	0.0644189	0.0746325	0.0647017	0.0563009	0.0448226	0.0556051	0.0614137	0.0759684	0.041958	0.0974743	0.0400235	0.0437318	0.892639	0.932777	0.0209901	0.552836	0.877968	0.970972	0.977792	0.136074	0.908958	0.996797
2513020852	Bti_GWDALJX04I0LJH_51-405_fm319.5	30818	DEL	CA	C	0.940576	0.94712	0.887006	0.958132	0.831452	0.952347	0.932936	0.942164	0.910334	0.909465	0.926346	0.935653	0.904516	0.937378	0.931326	0.933082	0.917378	0.923754	0.930055	0.941777	0.931782	0.947059	0.929772	0.933406	0.948104	0.929577	0.943396	0.944756	0.856598	0.406473	0.237077	0.758918	0.973531	0.953572	0.93462	0.465922	0.908958	0.996797
2513020852	Bti_GWDALJX04I0LJH_51-405_fm319.5	31707	DEL	TA	T	0.930023	0.930894	1	0.976546	0.938462	0.907834	0.924256	0.935484	0.920477	0.940178	0.908	0.912121	0.919728	0.917309	0.913835	0.914474	0.920202	0.903969	0.926278	0.910984	0.907549	0.915507	0.928401	0.903776	0.92013	0.924783	0.927472	0.922064	0.364931	0.494805	0.192027	0.766565	0.955798	0.936952	0.93462	0.459143	0.908958	0.996797
2513020852	Bti_GWDALJX04I0LJH_51-405_fm319.5	47655	DEL	TACGGACCGGAACTGGATCA	T	0.112031	0.0854191	0.107239	0.112392	0.0796221	0.113705	0.0986497	0.0853545	0.108489	0.0951602	0.0930378	0.0860331	0.0953039	0.100135	0.0977137	0.0942826	0.104914	0.107509	0.0958063	0.0776173	0.0812247	0.104526	0.100166	0.0859884	0.119693	0.111292	0.10412	0.0513171	0.62508	0.463091	0.192753	0.445073	0.889002	0.951052	0.93462	0.459143	0.908958	0.996797
2513020852	Bti_GWDALJX04I0LJH_51-405_fm319.5	48508	DEL	GT	G,GTT	0.0921228	0.00194175	0.0967742	0.0658054	0.0479007	0.00126103	0.0712296	0.066012	0.0800971	0.105151	0.113364	0.122585	0.00134273	0.00142602	0.0853495	0.105812	0.0871873	0.0863965	0.000951173	0.107136	0.125929	0.000789474	0.000623701	0.00165508	0.0847902	0.00158395	0.108936	0.000876808	0.140654	0.130715	0.502594	0.147675	0.529032	0.936952	0.93462	0.634145	0.623885	0.996797
2513020852	Bti_GWDALJX04I0LJH_51-405_fm319.5	48508	INS	GTTTTTTTTCTTTTGTCGA..AAGAACAACTAATGGATCT	GTTTTTTTCTTTTGTCGAA..AAGAACAACTAATGGATCT	0	0.0857397	0	0	0	0.065047	0.00128755	0	0	0	0	0.00108147	0.109913	0.0967118	0	0	0	0	0.101168	0.00154083	0.000718391	0.0781174	0.105136	0.0961768	0	0.088632	0.000901226	0	0.266642	0.0460733	0.986001	0.778051	0.0970853	0.936952	0.93462	0.988465	0.908958	0.92644
2513020852	Bti_GWDALJX04I0LJH_51-405_fm319.5	48515	RPL	TTCTTTTGTCGAATTCGAA..AAGAACAACTAATGGATCT	TCTTTTGTCGAATTCGAAT..ATTACAAGAACAATTAATG	0.0603504	0.0484848	0	0.0568087	0.0301775	0.0569206	0.0430422	0.0503218	0.0479512	0.0467938	0.0431442	NA	0.0440645	0.0458067	0.0486342	0.055409	0.0576435	0.0553955	0.0541679	0.0585395	NA	0.0602056	NA	0.0445344	0.0660178	0.0519481	0	0	0.285749	0.933347	0.79592	0.00321855	0.38026	0.936952	0.977792	0.875162	0.289466	0.996797
2513020852	Bti_GWDALJX04I0LJH_51-405_fm319.5	48515	RPL	TTCTTTTGTCGAATTCGAA..CCTTCGTTAAGAGGAGAGG	TCTTTTGTCGAATTCGAAT..CCTTCGTTAAGAGGAAAGA	0.0435657	0.0484541	0	0.0604669	0.043573	0.0512295	0.0422998	0.0538373	0.0348387	0.0395634	0.0387853	NA	0.0420059	0.0379487	0.0350459	0.0395587	0.0364026	0.0398458	0.0399386	0.0402573	NA	0.0358323	NA	0.0343184	0.0425926	0.0340492	0.0525576	0.054502	0.425131	0.377626	0.4023	0.0555302	0.22624	0.936952	0.93462	0.561297	0.623885	0.996797
2513020852	Bti_GWDALJX04I0LJH_51-405_fm319.5	48553	RPL	AGAGGTGGCGCATTACAAGAACAACTAATGGATCT	AAAGATGGCGCATTACAAGAACAATTAATG	0.0829774	0.0674054	0	0.0428222	0.0574107	0.0758564	0.058605	0.0635769	0.0575163	0.0574431	0.0598943	0.0707309	0.0695736	0.0775393	0.0748215	0.0728953	0.0813502	0.0784733	0.0827243	0.0733229	0.0763889	0.0858539	0.0712935	0.0757757	0.0819605	0.0796371	0	0	0.467879	0.233171	0.320814	0.0332497	0.24211	0.936952	0.93462	0.488365	0.623885	0.996797
2513020852	Bti_GWDALJX04I0LJH_51-405_fm319.5	48582	DEL	GGATCT	G	0.0772889	0.0676484	0.026738	0.0513817	0.0808868	0.067776	0.0666667	0.0651914	0.0614772	0.0549964	0.0648711	0.0580689	0.0609121	0.0690758	0.0718855	0.0761615	0.073281	0.0806697	0.0709904	0.0589838	0.0655527	0.0707635	0.0612207	0.0733648	0.083398	0.0726995	0.0799816	0	0.459224	0.369194	0.309967	0.11943	0.79594	0.936952	0.93462	0.475705	0.623885	0.996797
2513020852	Bti_GWDALJX04I0LJH_51-405_fm319.5	50284	INV	GACAGTTTGCTCCTGAAGA..CATAGGCATGGATAAAGAC	GGTCTTTATCCATGCCTAT..CATAGGCTTGGATAAAGAT	0.0479303	0	0	0.0400724	0	0.055297	0.0668763	0	0.0348121	0.0266259	0	0	0	0	0	0	0	0	0	0	0	0	0	0.0340265	0	0	0	0	0.781565	0.103807	0.00671158	0.152657	0.131122	0.951052	0.93462	0.114847	0.630757	0.962237
2513020852	Bti_GWDALJX04I0LJH_51-405_fm319.5	61337	RPL	GACGAAAACCTAGCCCGTTT	GCAAACCCTTCCCGT,GCA..GT,GCAAAACCCTGCCCGT	0	0	0	0	0	1	0	0	0	0	0	0	0	0	0	0	0	0	0	0	0	0	0	0	0	0	0	0.79381	0.818882	0.698222	0.700331	0.130113	0.140786	0.953572	0.93462	0.795859	0.623885	0.975071
2513020852	Bti_GWDALJX04I0LJH_51-405_fm319.5	61337	RPL	GACGAAAACCTAGCCCGTT	GCAAAACCTGCCCG,GCAA..CCCG,GCAAAACCTGCCGG	1	1	0	1	1	0	1	1	1	1	1	1	1	1	0.998428	1	1	1	0.998476	1	1	1	1	1	1	1	1	0	0.758224	0.697302	0.286777	0.224799	0.598517	0.951052	0.93462	0.465922	0.763768	0.996797
2513020852	Bti_GWDALJX04I0LJH_51-405_fm319.5	85519	INS	T	TTCA	0.0137221	0.0107914	0.0866667	0.0133102	0.0193871	0.0585198	0.0188206	0.0301984	0.0154036	0.00746826	0.00766088	0.0126743	0.0132794	0.012971	0.0127536	0.0165441	0.0358153	0.0290698	0.0153034	0.0128257	0.0158279	0.0368129	0.0176228	0.0094235	0.0343891	0.0166799	0.0186451	0.0130719	0.72182	0.612088	0.726782	0.670923	0.602707	0.951052	0.93462	0.813303	0.908958	0.996797
2513020852	Bti_GWDALJX04I0LJH_51-405_fm319.5	85711	RPL	AAACAAGATAAGCGAGATT..AAATGAAAATTGTACAGGA	AGACAAGATAAGCGAGATT..AAATGAAAATTGTACAAGG	0.0535183	0.045977	0	0.0400188	0.0119522	0.0348958	0.034891	0.0311442	0.0424165	0.0305164	0.02764	0.0252393	0.0331325	0.0284996	0.0307467	0.0374365	0.0356234	0.0282797	0.0322097	0.0190275	0.0146976	0.0274431	0.0350969	0.0308692	0.0568445	0.0261628	0.0371747	0.0477164	0.954212	0.740606	0.230056	0.489379	0.373792	0.987693	0.93462	0.460113	0.908958	0.996797
2513020852	Bti_GWDALJX04I0LJH_51-405_fm319.5	86582	DEL	TAGA	T	0.0738714	0.0672192	0	0.0506787	0.0794574	0.0650741	0.0781929	0.0948992	0.0562448	0.0528993	0.0416667	0.0425868	0.0517098	0.077484	0.0598504	0.060652	0.0723473	0.0739645	0.0688497	0.0554583	0.0464726	0.09375	0.0537213	0.0764088	0.0928463	0.0486685	0.0746842	0.0883157	0.405216	0.845989	0.467748	0.947106	0.76109	0.936952	0.939394	0.599235	0.965072	0.996797
2513020852	Bti_GWDALJX04I0LJH_51-405_fm319.5	124176	RPL	TGCTATATACAAAC	TTATACGTCGA,TTATACGTAGA	0.0800641	0.0952006	0.0520833	0.0790835	0.0917136	0.131702	0.085922	0.108202	0.0878635	0.0324241	0.0308609	0.0418435	0.0613306	0.0953815	0.105156	0.0946001	0	0.0912143	0.0892678	0.079322	0.0642367	0.142914	0.043683	0.0787815	0.0916335	0.092511	0.0659787	0.0611586	0.673346	0.500837	0.356749	0.742462	0.849249	0.951052	0.93462	0.526029	0.908958	0.996797
2513020853	Bti_contig00103_ace.6	9593	INS	G	GA	0.984227	0.994076	1	0.992812	0.998236	0.99262	0.984952	0.991409	0.991554	0.984783	0.984825	0.982609	0.991482	0.990812	0.981949	0.98927	0.990596	0.993065	0.987738	0.987132	0.985702	0.989642	0.98414	0.986376	0.99591	0	0.992796	0.990175	0.295633	0.192797	0.133242	0.796234	0.994598	0.936952	0.93462	0.420465	0.908958	0.996797
2513020854	Bti_contig00018_ace.7	11866	DEL	GA	G	0	0.157303	0.155556	0.156044	0.196305	0.184922	0.192148	0.232252	0.246835	0.217538	0	0	0	0	0	0	0	0	0	0.217969	0	0	0	0	0.189692	0	0.190707	0.202409	0.505739	0.137125	0.0129655	0.110792	0.000536102	0.951052	0.93462	0.114847	0.623885	0.123283
2513020854	Bti_contig00018_ace.7	17654	INS	C	CT	0.962457	0.946429	1	0.95539	0.955405	0.965257	0.953566	0.965074	0.934046	0.913093	0.934857	0.932635	0.946839	0.950425	0.934278	0.932084	0.950538	0.935401	0.934509	0.928972	0.946667	0.933036	0.93126	0.956322	0.960951	0	0.947768	0.938361	0.277155	0.212998	0.125192	0.787962	0.993094	0.936952	0.93462	0.416569	0.908958	0.996797
2513020854	Bti_contig00018_ace.7	17946	INS	ATT	AT,A,ATTT	0.0774527	0.0840029	0	0.00689655	0.0896057	0.00760719	0.00692042	0.00437318	0.0061792	0	0.00375375	0.101215	0	0.00247321	0.00388199	0	0.00331565	0.0035524	0.00248344	0.0058862	0	0.00938628	0.00285225	0.00534351	0.00835655	0	0.00391645	0.0507772	0.855101	0.511017	0.0133797	0.218058	0.0048177	0.953572	0.93462	0.114847	0.7522	0.292945
2513020854	Bti_contig00018_ace.7	17946	DEL	AT	ATT,A	0.0091659	0.00472813	0	0.101976	0.0108275	0.0926396	0.096519	0.110818	0.112754	0.0470348	0.110811	0.0062167	0.12179	0.0896861	0.088968	0.104775	0.0891331	0.0888158	0.0985704	0.12413	0.0294627	0.0977543	0.104478	0.109278	0.0919932	0	0.0327242	0.00252708	0.878999	0.956064	0.584116	0.287519	0.091156	0.970972	0.984019	0.710769	0.858679	0.92644
2513020855	Bti_GWDALJX04ID4Q6_538-448_to227.8	2659	DEL	CT	C	0	0	0	0	1	0	0	0	0	0	0	0	0	0	0	0	0	0	0	0	0	0	0	0	1	0	1	1	0.974816	0.621234	0.388362	0.00590427	0.0225928	0.994152	0.93462	0.557343	0.289466	0.603551
2513020855	Bti_GWDALJX04ID4Q6_538-448_to227.8	4039	RPL	ACTTTAAAAGTAATGTAGA..CGATCATGAATTTAAACAA	ATTTTAAAAGTAATGAAGA..CGATCATGAATTTAAGCAG	0.0100733	0.0147698	0	0.0074129	0.0519348	0.00622407	0.00932401	0.00823045	0.0129964	0.0147136	0.0184989	0.0149837	0.0134804	0.0085003	0.016119	0.0132696	0.0155869	0.0200907	0.00985222	0.014261	0.011504	0.012842	0.0175725	0.017684	0.0186457	0	0.0205164	0.0159915	0.985727	0.953042	0.452547	0.848278	0.805003	0.994152	0.984019	0.590825	0.910694	0.996797
2513020855	Bti_GWDALJX04ID4Q6_538-448_to227.8	5197	INV	TAGGGGTCACCATACATGC..GATAGATATGCTCTAAAGT	TACTTTAGAGCATATCTAT..GGCATGTATGGTGACCCCT	0.167404	0.186756	0	0.175495	0.234826	0	0.172662	0.176431	0.168367	0.157202	0.102126	0.092233	0.112977	0.114241	0.121016	0.12495	0.133057	0.138745	0.111315	0.121725	0.131853	0.141653	0.118304	0.1	0.159567	0	0.143251	0.144864	0.724115	0.141591	0.0921307	0.74623	0.578452	0.951052	0.93462	0.368523	0.908958	0.996797
2513020855	Bti_GWDALJX04ID4Q6_538-448_to227.8	5991	DEL	TG	T	1	1	1	1	1	1	1	1	1	1	1	1	1	1	1	1	1	1	1	1	1	1	1	1	1	0	1	1	0.284282	0.183098	0.134191	0.793559	0.993427	0.936952	0.93462	0.420465	0.908958	0.996797
2513020855	Bti_GWDALJX04ID4Q6_538-448_to227.8	6051	DEL	GT	G	NA	NA	NA	NA	NA	NA	0	NA	NA	NA	NA	NA	NA	NA	NA	NA	NA	NA	NA	0	1	NA	NA	NA	0	NA	0	0	0.0840813	0.72648	0.836254	0.373812	0.553378	0.936952	0.93462	0.888533	0.908958	0.996797
2513020855	Bti_GWDALJX04ID4Q6_538-448_to227.8	6141	RPL	GATTGATCCATTTGATCTAAGTCCTCTAATGAAAAATAAC	GTTGATCCATTTGATCTAA..GTCCTCTAATGAAAAATAA	1	0	0	0	0	0	1	0	1	1	1	1	1	1	1	1	1	0	0.978723	1	1	0	1	1	0	0	1	1	0.582139	0.767988	0.813587	0.757558	0.42921	0.951052	0.93462	0.881581	0.908958	0.996797
2513020855	Bti_GWDALJX04ID4Q6_538-448_to227.8	6141	DEL	GA	G	0	0	1	0	0	0	1	1	1	1	1	1	1	1	1	1	1	0	1	1	1	1	1	1	1	0	1	1	0.77256	0.837325	0.74123	0.49007	0.13634	0.951052	0.935678	0.824563	0.908958	0.962237
2513020855	Bti_GWDALJX04ID4Q6_538-448_to227.8	6179	DEL	AC	A	1	1	0	1	1	1	1	1	1	1	1	1	1	1	1	1	1	1	0.985401	1	1	1	1	1	1	0	1	1	0.301752	0.185117	0.132735	0.795487	0.99355	0.936952	0.93462	0.420465	0.908958	0.996797
2513020856	Bti_contig00032_ace.9	6682	RPL	CCACATTGAGTGTT	CTGTATTGAGTGTC,CTGTATTGAGTGTT	0	1	0	1	1	0	1	1	0.807692	1	1	1	1	1	1	1	1	0	1	1	0	1	1	0	1	0	0.88	1	0.904544	0.991263	0.179487	0.739782	0.694126	0.974463	0.995667	0.459143	0.908958	0.996797
2513020856	Bti_contig00032_ace.9	6713	RPL	TGTACGGTATTGATCATAT..TATGATATGGTGCAATTGA	TTCACGATATTGATCATAT..TATGATATGGTGCAATTAG	0.916667	0	0	0	0	0	1	1	1	1	1	1	0	0	0	0	0	0	0	0	0	1	1	0	0	0	0	1	0.210961	0.0282544	0.0456568	0.246134	0.418622	0.936952	0.93462	0.235164	0.796139	0.996797
2513020856	Bti_contig00032_ace.9	6864	RPL	TGCTGCAAGGTGTATCGATTCAAAGGATTCACT	TTCTGTAAGGTGTATCGGT..TCGGTTCACAGGATACACA	0	0	0	0	0	0	0	0	0	1	1	0	0	0	1	1	0	0	0	1	0	0	0	0	0	0	0	0	0.373101	0.524241	0.912085	0.287656	0.385368	0.936952	0.93462	0.937006	0.858679	0.996797
2513020856	Bti_contig00032_ace.9	12220	RPL	CAGCAGAACAGGGAGCCCC..TACAACAAGCAAGTATACC	CCGCAGAACAGGGAGCCCC..TACAACAAGCAAGGCTGCT	1	1	0	1	1	1	1	1	1	1	1	1	1	1	1	0.959184	0.961538	1	1	1	0.980392	1	1	1	1	0	1	0.980392	0.278206	0.181604	0.122558	0.800887	0.991836	0.936952	0.93462	0.416569	0.908958	0.996797
2513020856	Bti_contig00032_ace.9	12265	RPL	TACCTGGAATAACAATAGA..AAAATCCCTCCAATAAAGT	TGCTTGGAATAACAATAGA..AAAATCCCTCCAATAAAGA	0	0	0	0	0	0	0	0	0	0	0	0	0	0	0	0.777778	0	0	0	0	0	0	0	0	0	0	0.00757576	0	0.869478	0.443733	0.421285	0.342311	0.573628	0.964875	0.93462	0.570388	0.908958	0.996797
2513020858	Bti_GWDALJX04IUDN7_432-463_fm366.11	2842	RPL	TACT	TGC	0	0	0	0	0	1	0	0	0	0	0	0	0	0	0	0	0	0	0	0	0	0	0	0	0	0	0	0	0.780073	NA	0.298511	0.866515	0.761834	0.951052	NA	0.465922	0.910694	0.996797
2513020858	Bti_GWDALJX04IUDN7_432-463_fm366.11	2844	RPL	CTA	CC,CG	0	0	0	0	0	0	0	0	0	0	0	0	0	0	0	0	0	0	0	0	0	0	0.0731707	0.15	0	0	0.00678119	0.0097057	0.204999	0.510265	0.221003	0.14176	0.324339	0.936952	0.93462	0.459143	0.623885	0.996797
2513020858	Bti_GWDALJX04IUDN7_432-463_fm366.11	2844	DEL	CT	C	1	1	1	1	1	1	1	1	1	1	1	1	1	1	1	0.998796	1	1	1	1	1	1	1	1	1	0	1	1	0.284351	0.183395	0.134073	0.793921	0.99341	0.936952	0.93462	0.420465	0.908958	0.996797
2513020859	Bti_abtiPMpcY1_bti353.12	6962	RPL	CGTAAATATTATGAATAAT..GAGACATCCCACCGCTTGG	CATAAACATTCTGAAGAAT..GATACATCCCACCGATTAA	0	0.00285103	0	0.00807382	0	0.00248756	0.00322997	0.0113636	0.00452196	0.00614948	0.00872727	0.0044287	0.00567721	0	0.0125209	0.00958904	0.0133333	0.0125418	0.0108243	0.00948992	0.00628931	0.00738552	0	0.016323	0.0600858	0	0.0109469	0.015145	0.484357	0.630015	0.17731	0.611435	0.579211	0.936952	0.93462	0.459143	0.908958	0.996797
2513020864	Bti_GWDALJX04INGIM_512-463_to96.17	1547	DEL	TA	T	1	1	1	1	1	1	1	1	1	1	1	1	1	1	1	1	1	1	1	1	1	1	0	1	0	0	1	0	0.279138	0.528966	0.0150015	0.112159	0.634585	0.936952	0.93462	0.114847	0.623885	0.996797
2513020864	Bti_GWDALJX04INGIM_512-463_to96.17	1547	RPL	TACAACAGAAAGCTTTAAG..TACGTTGAGACTCTATTTA	TCAACAGAAAGCTTTAAGA..ATACGTTGAGCCTCTATTT	1	1	0	1	1	1	1	1	1	1	1	1	1	1	1	1	1	1	1	1	1	1	0	1	0	0	1	0	0.279138	0.528966	0.0150015	0.112159	0.634585	0.936952	0.93462	0.114847	0.623885	0.996797
2513020864	Bti_GWDALJX04INGIM_512-463_to96.17	1590	DEL	TA	T	1	1	1	1	1	1	1	1	1	1	1	1	1	1	1	1	1	1	1	1	1	1	0	1	0	0	1	0	0.279138	0.528966	0.0150015	0.112159	0.634585	0.936952	0.93462	0.114847	0.623885	0.996797
2513020865	Bti_GWDALJX04IG4JR_1-226.18	2181	DEL	TA	T	1	1	1	1	0.999392	0.999363	1	1	1	0.998881	1	1	1	0.999303	1	1	1	1	1	1	1	0.999598	0	1	0	0	0	0	0.278847	0.528473	0.00307254	0.011165	0.288519	0.936952	0.93462	0.0934503	0.389926	0.996797
2513020865	Bti_GWDALJX04IG4JR_1-226.18	3815	DEL	GA	<INS>,G	0.62135	0	0.761427	0.599333	0.577515	0.583517	0	0	0	0	0	0	0	0	0.650339	0.615623	0	0.652245	0.635883	0	0	0	0	0	0	0	0	0	0.00034154	0.250762	0.688547	0.00582679	0.703659	0.0604525	0.93462	0.78931	0.289466	0.996797
2513020865	Bti_GWDALJX04IG4JR_1-226.18	3815	DEL	GACGAAAGAAAT	GCGAAAGAAAT,GCAAAAG..AAGAAAA,GCGATAGAAAT	0	0.633582	0	0.00118788	0.00107527	0	0.582702	0.637822	0	0	0	0	0	0	0.00153576	0	0	0	0	0	0	0.647764	0	0	0	0	0	0	0.164365	0.46266	0.213374	0.452549	0.59699	0.936952	0.93462	0.459143	0.908958	0.996797
2513020869	Bti_pBT679_7_3.22	1524	RPL	AATTTGTAGTAGCTTTATA..CCCTGCTCTTTCATGATTC	ATTTTGTAGTAGTTTTATT..CCCTGCTCTTTCATGTTTT	0	0	NA	0.3	0	0	0	0	0	0	0	0	0.833333	0	0	0	0	0	0	0	0	0	0	0	0	0	0	0	0.765749	0.0142202	0.157433	0.546821	0.336136	0.951052	0.93462	0.459143	0.908958	0.996797
2513020869	Bti_pBT679_7_3.22	3634	DEL	TG	T	0	0	0	0	0.6	0	0	0	0	0	0	0	0	0	0	0	0	0	0	0	0	0	0	0	0	0	0	0	0.807279	0.803083	0.297169	0.871941	0.700825	0.951052	0.93462	0.465922	0.910694	0.996797
2513020869	Bti_pBT679_7_3.22	3635	DEL	GT	G	1	0.995037	1	0.99604	0.995413	1	0.991684	0.993939	0.997275	1	1	0.996997	1	0.994318	0.997522	1	1	0.995546	0.995316	1	1	1	0	0.989071	0	0	0.997257	0	0.275978	0.531725	0.0150628	0.111045	0.634111	0.936952	0.93462	0.114847	0.623885	0.996797
2513020870	Bti_pBT679_4.23	122	DEL	AT	A	0.285714	0.6	0	0.136364	0	0.405405	0.555556	0.692308	0.297297	0.391304	0.324324	0.319149	0.283019	0.307692	0.253731	0.52381	0.527273	0.517241	0.444444	0.319588	0.466667	0.40625	0	0.52381	0	0	0.492308	0	0.840964	0.430791	0.274736	0.247735	0.764593	0.953572	0.93462	0.465922	0.796139	0.996797
2513020870	Bti_pBT679_4.23	126	DEL	TG	T	1	1	0	1	1	1	1	1	1	1	1	1	1	1	1	1	1	1	1	1	1	1	0	1	0	0	1	0	0.279138	0.528966	0.0150015	0.112159	0.634585	0.936952	0.93462	0.114847	0.623885	0.996797
2513020870	Bti_pBT679_4.23	126	RPL	TGAATCAGAATCAATCCAT..ACAAATTTTATTTGCGTAT	TAATCAGAATCAATCCATTTTACAAATTTTATTTGC	0.115468	0.0736842	0	0.0760234	0.225251	0.104938	0.0889894	0.0938776	0.0720562	0.0877698	0.0859107	0.0841121	0.0731707	0.0909091	0.126016	0.15444	0.136437	0.110151	0.103158	0.14375	0.19708	0.148073	0	0.16763	0	0	0.143949	0	0.231428	0.52021	0.519027	0.135861	0.873873	0.936952	0.93462	0.650513	0.623885	0.996797
2513020870	Bti_pBT679_4.23	127	DEL	GA	G	1	1	0	1	1	1	1	1	1	1	1	1	1	0.99654	1	1	1	1	1	1	1	1	0	1	0	0	1	0	0.278131	0.526376	0.0150458	0.111499	0.637436	0.936952	0.93462	0.114847	0.623885	0.996797
2513020870	Bti_pBT679_4.23	127	RPL	GAA	GC	0	0	0	0	0	0	0	0	0	0	0	0	0	0	0	0	0	0	0	0	0	0	0	0	0	0	0.555556	0	NA	NA	0.408666	0.144827	0.464012	NA	NA	0.561297	0.623885	0.996797
2513020870	Bti_pBT679_4.23	128	RPL	AATCAGAATCAATCCATTTTACAAATTTTATTTGCGTAT	ATCAGAATCAATCCATTTT..TTTTACAAATTTCATTTGC	0.2	0.185299	NA	0.141831	0.449951	0.155492	0.105644	0.213058	0.160883	0.162791	0.157233	0.155026	0.133615	0.134731	0.210145	0.3	0.188707	0.228464	0.0638298	0.214085	0.323887	0.263525	0	0.248705	0	0	0.268817	0	0.58821	0.422447	0.286876	0.167527	0.996797	0.951052	0.93462	0.465922	0.663055	0.996797
2513020870	Bti_pBT679_4.23	128	RPL	AATCAGAATCAATCCATTTTACAAATTTTATTTGCGTAT	ATCAGAATCAATCCATTTTACAAATTTTATTTGC	0	0	NA	0	0	0	0	0	0	0	0	0	0	0	0	0.219081	0	0	0.170543	0	0	0	0	0	0	0	0	0	0.0735556	0.369035	0.249915	0.281363	0.536494	0.936952	0.93462	0.465922	0.858679	0.996797
2513020870	Bti_pBT679_4.23	166	DEL	TGTAG	T	0.499383	0.487876	0.555556	0.580531	0.434555	0.529221	0.456835	0.498871	0.500945	0.533137	0.497164	0.497436	0.443223	0.475621	0.501738	0.549846	0.522202	0.546256	0.504075	0.523892	0.585947	0.539474	0	0.564955	0	0	0.513748	0	0.23692	0.322483	0.039126	0.0965034	0.696568	0.936952	0.93462	0.210163	0.623885	0.996797
2513020870	Bti_pBT679_4.23	257	DEL	GA	G	0.488372	0.589744	0	0.4375	0.230769	0.44186	0.451327	0.479167	0.333333	0.416058	0.337838	0.347518	0.384615	0.296875	0.4	0.355372	0.477707	0.327731	0.297872	0.448819	0.333333	0.382353	0	0.5	0	0	0.410405	0	0.595305	0.465164	0.0174631	0.0746323	0.978445	0.951052	0.93462	0.123889	0.623885	0.996797
2513020870	Bti_pBT679_4.23	259	RPL	AAATCCGTATTTCAAATCA..TTTACGCAAATTGACTCGA	ACACCGTATTTCAAATCAATTCTTTACGCAAATTGACTCG	0	0	0	0	0	0	0	0	0	0	0	0	0	0	0	0	0	0	0	0	0	0	0	0	0	0	0.0731707	0	NA	NA	0.408666	0.144827	0.464012	NA	NA	0.561297	0.623885	0.996797
2513020870	Bti_pBT679_4.23	261	DEL	ATCCGTATTTCAAATCAATTCTTTACGCAAATTGACTCGA	ACCGTATTTCAAATCAATT..CTTTACGCAAATTGACTCG	1	1	0	1	1	1	1	1	1	1	1	1	1	1	1	1	1	1	1	1	1	1	0	1	0	0	1	0	0.279138	0.528966	0.0150015	0.112159	0.634585	0.936952	0.93462	0.114847	0.623885	0.996797
2513020870	Bti_pBT679_4.23	261	RPL	ATCCGTATTTCAAATCAATTCTTTACGCAAATTGACTCG	AACGTATTTCAAATCAATT..CTTTACGCAAATTGACTCG	1	1	0	1	1	1	1	1	1	1	1	1	1	1	1	1	1	1	1	1	1	1	0	1	0	0	1	0	0.279138	0.528966	0.0150015	0.112159	0.634585	0.936952	0.93462	0.114847	0.623885	0.996797
2513020870	Bti_pBT679_4.23	261	RPL	ATCCGTATTTCAAATCAATTCTTTACGCAAATTGACTCG	ACCGTATTTCAAATCAATT..TCTTTACGCAAATTGACTC	0	1	0	1	1	0	0	0	1	1	1	0	1	1	1	1	1	1	1	1	1	1	0	1	0	0	0	0	0.693674	0.721959	0.582664	0.137461	0.119332	0.951052	0.93462	0.710769	0.623885	0.962237
2513020870	Bti_pBT679_4.23	262	DEL	TC	T	1	1	0	1	1	1	1	1	1	1	1	1	1	1	1	1	1	1	1	1	1	1	0	1	0	0	1	0	0.279138	0.528966	0.0150015	0.112159	0.634585	0.936952	0.93462	0.114847	0.623885	0.996797
2513020870	Bti_pBT679_4.23	262	RPL	TCC	TA	0	0	0	0	0	0	0	0	0	0	0	0	0	0	0	0	0	0	0	0	0	1	0	0	0	0	0	0	0.335681	0.715011	0.441617	0.650193	0.793304	0.936952	0.93462	0.58656	0.908958	0.996797
2513020870	Bti_pBT679_4.23	263	RPL	CCGTATTTCAAATCAATTCTTTACGCAAATTGACTCGA	CGTATTTCAAATCAATTCT..TTTACGCAAATTGACTCGA	1	1	0	1	1	1	1	1	1	1	1	1	1	1	1	1	1	1	1	1	1	1	0	1	0	0	0	0	0.279138	0.528966	0.00306521	0.0111897	0.288325	0.936952	0.93462	0.0934503	0.389926	0.996797
2513020870	Bti_pBT679_4.23	263	RPL	CCGTATTTCAAATCAATTCTTTACGCAAATTGACTCGA	CGTATTTCAAATCAATTCT..CTTTACGCAAATTGACTCG	0	0	0	1	0	1	1	0	1	0	0	0	0	0	0	0	0	0	0	0	0	0	0	0	0	0	1	0	0.981278	0.0612611	0.0758424	0.67	0.106408	0.994152	0.93462	0.324054	0.908958	0.92644
2513020870	Bti_pBT679_4.23	298	RPL	CGATTTTTTGCATCAATAT..GTTCCTTCATATTTCTACT	CATTTTTTGCATCAATATC..TGTTCCTCATATTTCTACT	1	1	0	1	1	1	1	1	1	1	1	1	1	1	1	1	1	1	1	1	1	1	0	1	0	0	1	0	0.279138	0.528966	0.0150015	0.112159	0.634585	0.936952	0.93462	0.114847	0.623885	0.996797
2513020870	Bti_pBT679_4.23	298	RPL	CGATTTTTTGCATCAATAT..GTTCCTTCATATTTCTACT	CATTTTTTGCATCAATATC..TTGTTCCTCATATTTCTCC	0.974359	0.982456	0	1	0.902439	0.986111	0.988636	1	1	0.985294	1	0.976744	1	1	1	1	1	1	1	0.977273	1	1	0	1	0	0	1	0	0.285031	0.52979	0.017917	0.120187	0.597441	0.936952	0.93462	0.124755	0.623885	0.996797
2513020870	Bti_pBT679_4.23	299	RPL	GATTTTTTGCATCAATATC..GTTCCTTCATATTTCTACT	GTTTTTTGCATCAATATCC..TTGTTCCTCATATTTCTAC	0	0	0	0	0	0	0	0	0	0	0	0	0	0	0	0	0	0	0	0	0	0	0	0	0	0	1	0	NA	NA	0.408666	0.144827	0.464012	NA	NA	0.561297	0.623885	0.996797
2513020870	Bti_pBT679_4.23	305	RPL	TTGCATCAATATCCTTCTT..TGTGGTTTGTCTTTTGTTC	TGCATCAATATCCTTCTTT..TTGTGGTTTGTCTTTTTTT	1	1	0	1	1	1	1	1	1	1	1	1	1	1	1	1	1	1	1	1	1	1	0	1	0	0	NA	NA	0.406922	0.366534	0.00397661	0.0126835	0.00704948	0.936952	0.93462	0.0934503	0.389926	0.292945
2513020870	Bti_pBT679_4.23	305	RPL	TTGCATCAATATCCTTCTT..GTTCCTTCATATTTCTACT	TGCATCAATATCCTTCTTT..TTGTTCTTCATATTTCTAC	0.992	0.989011	0	1	0.940741	0.991935	0.989583	1	1	0.994845	1	0.980769	1	1	1	1	1	1	1	0.984962	1	1	0	1	0	0	NA	NA	0.407864	0.367783	0.00447627	0.0134815	0.00640953	0.936952	0.93462	0.0990046	0.389926	0.292945
2513020870	Bti_pBT679_4.23	350	RPL	GTTCCTTCATATTTCTACT	GGTCCTCATATTTCTAC	0	0	0	0	0	0	0	0	0	0	0	0	0	0	0	0	0	0	0	0	0	0	0	0	0	0	1	0	NA	NA	0.408666	0.144827	0.464012	NA	NA	0.561297	0.623885	0.996797
2513020870	Bti_pBT679_4.23	352	RPL	TCCTTCATATTTCTACT	TACTCATATTTCTAC,TTC..TAC,TTTTTATATTTCTAC	0	0	0	0	0	0	0	0	0	0	0	0	0	1	0	0	0	0	0	0.6	1	0	0	0	0	0	1	0	0.948711	0.280422	0.553609	0.186708	0.25204	0.987693	0.93462	0.682482	0.695071	0.996797
2513020870	Bti_pBT679_4.23	353	RPL	CCTTCATATTTCTACT	CTTCATATTTCTAC	0.267152	0.263553	0.253521	0.169456	0.969697	0.251253	0.0878853	0.295228	1	0.230769	1	0.222734	1	1	0.135729	0.255616	0.137549	0.131399	0.253147	0.148998	0	0.0827919	0	0.132378	0	0	0	0	0.451852	0.138137	0.000230946	0.672487	0.0731333	0.936952	0.93462	0.0173671	0.908958	0.920428
2513020870	Bti_pBT679_4.23	355	RPL	TTCATATTTCTACT	TCATATTTCTAC,TCATAT..TTCTAC,TCATATTTCTTC	0.155415	0	0.53304	0.273891	0.23703	0.198343	0	0.218173	0.270871	0.241497	0.500931	0.325442	0.239696	0.327451	0	0	0	0.274757	0.174525	0	0	0	0	0	0	0	0	0	0.846069	0.703107	8.50054e-05	0.748341	0.275014	0.953572	0.93462	0.00799051	0.908958	0.996797
2513020870	Bti_pBT679_4.23	367	DEL	CT	C	0.994792	0.916667	0	1	0.962617	0.996422	0.995807	1	1	0.996627	1	0.994382	1	1	1	1	1	1	1	0.993651	1	1	0	1	0	0	1	0	0.263001	0.526082	0.017255	0.122297	0.593285	0.936952	0.93462	0.123889	0.623885	0.996797
2513020870	Bti_pBT679_4.23	487	RPL	CGGA	CAG	0	0	0	0	0	0	0	0	0	0	0	0	0	0	0	0	0	0	0	0	0	0	0	0	0	0	0.0606061	0	NA	NA	0.408666	0.144827	0.464012	NA	NA	0.561297	0.623885	0.996797
2513020870	Bti_pBT679_4.23	489	DEL	GA	G	1	1	1	1	1	1	1	1	1	1	1	1	1	1	1	1	1	1	1	1	1	1	0	1	0	0	1	0	0.279138	0.528966	0.0150015	0.112159	0.634585	0.936952	0.93462	0.114847	0.623885	0.996797
2513020870	Bti_pBT679_4.23	489	RPL	GAAGTAGTTTATATGATTC..ATGGGGAAAATCAACTCAG	GGGTAGTTTATATGATTCA..ATGGGGAAAATCAACTCAG	1	1	0	1	0	1	0	1	0	1	0	0	0	0	1	0	0	0	0	0	0	0	0	1	0	0	1	0	0.242688	0.241372	0.0957359	0.568513	0.102351	0.936952	0.93462	0.374966	0.908958	0.92644
2513020870	Bti_pBT679_4.23	490	RPL	AAGTAGTTTATATGATTCA..AATGGGGAAAATCAACTCA	AGGAGTTTATATGATTCAC..AAATGGGGAAAATCAACTC	1	1	1	1	1	1	1	1	1	1	1	1	1	1	1	1	1	1	1	1	1	1	0	1	0	0	1	0	0.279138	0.528966	0.0150015	0.112159	0.634585	0.936952	0.93462	0.114847	0.623885	0.996797
2513020870	Bti_pBT679_4.23	490	RPL	AAGTAGTTTATATGATTCA..AATGGGGAAAATCAACTCA	AGTAGTTTATATGATTCAC..AAATGGGGAAAATCAACTC	1	1	0	1	1	1	1	1	1	1	1	1	1	1	1	1	1	1	1	1	1	1	0	1	0	0	1	0	0.279138	0.528966	0.0150015	0.112159	0.634585	0.936952	0.93462	0.114847	0.623885	0.996797
2513020870	Bti_pBT679_4.23	490	RPL	AAGTAGTTTATATGATTCA..ATGGGGAAAATCAACTCAG	AGTAGTTTATATGATTCAC..ATGGGGAAAATCAACCTCG	0	0	0	0	0	0	1	0	0	0	0	0	0	0	0	0	0	0	0	0	0	0	0	0	0	0	0	0	0.671906	0.696929	0.295112	0.770392	0.703149	0.951052	0.93462	0.465922	0.908958	0.996797
2513020870	Bti_pBT679_4.23	490	RPL	AAGTAGTTTATATGATTCA..TGGGGAAAATCAACTCAGT	AGTAGTTTATATGATTCAC..ATGGGGAAAATCAACTCAT	0	0	0	0	0	0	1	0	0	0	0	0	0	0	0	0	0	0	0	0	0	0	0	0	0	0	1	0	0.671906	0.696929	0.839052	0.514961	0.39519	0.951052	0.93462	0.888533	0.908958	0.996797
2513020870	Bti_pBT679_4.23	490	RPL	AAGTAGTTTATATGATTCA..GGGAAAATCAACTCAGTTA	AGTAGTTTATATGATTCAC..GGGAAAATCAACTCGGTTT	0	0	0	0	0	0	1	0	0	0	0	0	0	0	0	0	0	0	0	0	0	0	0	0	0	0	0	0	0.671906	0.696929	0.295112	0.770392	0.703149	0.951052	0.93462	0.465922	0.908958	0.996797
2513020870	Bti_pBT679_4.23	490	RPL	AAGTAGTTTATATGATTCA..AAATCAACTCAGTTATGGT	AGTAGTTTATATGATTCAC..AAAATCAACTCGTTATGGG	0	0	0	0	0	0	1	0	0	0	0	0	0	0	0	0	0	0	0	0	0	0	0	0	0	0	0	0	0.671906	0.696929	0.295112	0.770392	0.703149	0.951052	0.93462	0.465922	0.908958	0.996797
2513020870	Bti_pBT679_4.23	491	DEL	AGTAGTTTATATGATTCAC..AATGGGGAAAATCAACTCA	ATAGTTTATATGATTCACA..AAATGGGGAAAATCAACTC	1	1	0	1	1	1	1	1	1	1	1	1	1	1	1	1	1	1	1	1	1	1	0	1	0	0	1	0	0.279138	0.528966	0.0150015	0.112159	0.634585	0.936952	0.93462	0.114847	0.623885	0.996797
2513020870	Bti_pBT679_4.23	491	RPL	AGTAGTTTATATGATTCAC..AATGGGGAAAATCAACTCA	ATAGTTTATATGATTCACA..AATGGGGAAAATCAACTCA	1	1	0	1	1	1	1	1	1	1	1	1	1	1	1	1	1	1	1	1	1	1	0	1	0	0	1	0	0.279138	0.528966	0.0150015	0.112159	0.634585	0.936952	0.93462	0.114847	0.623885	0.996797
2513020870	Bti_pBT679_4.23	491	RPL	AGTAGTTTATATGATTCAC..AATGGGGAAAATCAACTCA	ATAGTTTATATGATTCACA..AAATGGGGAAAATCAACTC	0	0	0	0	0	0	0	0	0	0	0	0	0	0	0	0	1	0	0	0	0	0	0	0	0	0	1	0	0.461517	0.239827	0.264049	0.594592	0.760667	0.936952	0.93462	0.465922	0.908958	0.996797
2513020870	Bti_pBT679_4.23	505	RPL	TTCACAAGCGAAATGGGGAAAATCAACTCAG	TCAACAAGCGAAATGGGGA..AATGGGGAAAATCAACTCG	0	0	0	0	0	0	1	1	0	0	0	0	0	0	0	0	0	0	0	0	0	0	0	0	0	0	NA	0	0.587693	0.462225	0.124233	0.440604	0.375968	0.951052	0.93462	0.416569	0.908958	0.996797
2513020870	Bti_pBT679_4.23	526	RPL	ATCAACTCAGTTATGGTTG..CCAGAAGGTGTTGTGTTAT	AATCACCTCGTTATGGTTG..ACCAGAAGGTGTTGTGTTA	0	0	0	0	0	0	0	1	0	0	0	0	0	0	0	0	0	0	0	NA	0	0	0	0	0	0	0	0	0.743476	0.532687	0.30203	0.616625	0.559794	0.951052	0.93462	0.467339	0.908958	0.996797
2513020870	Bti_pBT679_4.23	529	RPL	AACTCAGTTATGGTTGGTA..CCAGAAGGTGTTGTGTTAT	AGCTCGTTATGGTTGGTAT..ACCAGAACGTGTTATGTTA	0	0	0	0	0	0	0	1	0	0	0	0	0	0	0	0	0	0	0	0	0	0	0	0	0	0	0	0	0.743996	0.532279	0.286776	0.607119	0.545947	0.951052	0.93462	0.465922	0.908958	0.996797
2513020870	Bti_pBT679_4.23	533	DEL	CA	C	1	1	0	1	1	1	1	1	1	1	1	1	1	1	1	1	1	1	1	1	1	1	0	1	0	0	1	0	0.279138	0.528966	0.0150015	0.112159	0.634585	0.936952	0.93462	0.114847	0.623885	0.996797
2513020870	Bti_pBT679_4.23	533	RPL	CAGTTATGGTTGGTATAAA..CCAGAAGGTGTTGTGTTAT	CGTTATGGTTGGTATAAAG..CCAGAAGGTGTTGTGTTAT	1	1	0	1	1	1	1	1	1	1	1	1	1	1	1	1	1	1	1	1	1	1	0	1	0	0	1	0	0.279138	0.528966	0.0150015	0.112159	0.634585	0.936952	0.93462	0.114847	0.623885	0.996797
2513020870	Bti_pBT679_4.23	533	RPL	CAGTTATGGTTGGTATAAA..CCAGAAGGTGTTGTGTTAT	CGTTATGGTTGGTATAAAG..ACCAGAAAGGGTTGGGTTT	1	1	0	1	1	1	1	1	1	1	1	1	1	1	1	1	1	1	1	1	1	1	0	1	0	0	1	0	0.279138	0.528966	0.0150015	0.112159	0.634585	0.936952	0.93462	0.114847	0.623885	0.996797
2513020870	Bti_pBT679_4.23	533	RPL	CAGTTATGGTTGGTATAAA..GGTGTTGTGTTATTCTTAC	CGTTATGGTTGGTATAAAG..AGGTGTTGTGTGATTTTAA	0	0	0	1	0	0	0	0	0	0	0	0	0	0	0	0	0	0	0	0	0	0	0	0	0	0	1	0	0.236051	0.388488	0.838197	0.597566	0.294339	0.936952	0.93462	0.888533	0.908958	0.996797
2513020870	Bti_pBT679_4.23	533	RPL	CAGTTATGGTTGGTATAAA..AGAAGGTGTTGTGTTATTC	CGTTATGGTTGGTATAAAG..CAGAAGGTGTTGTGTTTTC	0	0	0	1	1	0	0	0	0	0	0	0	0	0	0	0	0	0	0	0	0	0	0	0	0	0	1	0	0.303024	0.660701	0.412016	0.846091	0.191952	0.936952	0.93462	0.561297	0.910694	0.996797
2513020870	Bti_pBT679_4.23	534	DEL	AG	A	1	1	0	1	1	1	1	1	1	1	1	1	1	1	1	1	1	1	1	1	1	1	0	1	0	0	1	0	0.279138	0.528966	0.0150015	0.112159	0.634585	0.936952	0.93462	0.114847	0.623885	0.996797
2513020870	Bti_pBT679_4.23	534	RPL	AGTTATGGTTGGTATAAAG..AGAAGGTGTTGTGTTATTC	ATTATGGTTGGTATAAAGG..AGAAGGTGTTGTGTTATTC	1	1	0	1	1	1	1	1	1	1	1	1	1	1	1	1	1	1	1	1	1	1	0	1	0	0	1	0	0.279138	0.528966	0.0150015	0.112159	0.634585	0.936952	0.93462	0.114847	0.623885	0.996797
2513020870	Bti_pBT679_4.23	534	RPL	AGTTATGGTTGGTATAAAG..AGAAGGTGTTGTGTTATTC	ATTATGGTTGGTATAAAGG..CAGAAGGTGTTGTGTTATT	1	1	0	0	0	1	1	1	0	1	1	0	0	1	1	1	1	0	1	1	1	1	0	1	0	0	1	0	0.440597	0.729403	0.61829	0.339841	0.893715	0.936952	0.93462	0.735687	0.908958	0.996797
2513020870	Bti_pBT679_4.23	554	RPL	ATATAAGGCTCATGTTTGT..TTACAACAGCAAACGTACA	AAAAAAGGCTCATGTTTGT..TTTACAACAGCAAACGTAC	0	0	0	0	0	0	1	0	0	0	0	0	0	0	0	0	0	0	0	0	0	0	0	0	0	0	0	0	0.671906	0.696929	0.295112	0.770392	0.703149	0.951052	0.93462	0.465922	0.908958	0.996797
2513020870	Bti_pBT679_4.23	556	RPL	ATAAGGCTCATGTTTGTTC..TTACAACAGCAAACGTACA	AAAAGGCTCATGTTGTTTC..TTTACAACAGCAAACGTAC	0	0	0	0	0	0	0	1	0	0	0	0	0	0	0	0	0	0	0	0	1	0	0	0	0	0	0	0	0.479402	0.499019	0.843463	0.505155	0.895474	0.936952	0.93462	0.888533	0.908958	0.996797
2513020870	Bti_pBT679_4.23	559	RPL	AGGCTCATGTTTGTTCAAC..TTACAACAGCAAACGTACA	ATGGTCATGTTTGTTCAAC..TTTACAACAGCAAACGTAC	0	0	NA	0	0	0	0	0	0	0	0	0	0	0	0	0	0	0	0	0	1	0	0	0	0	0	0	0	0.185016	0.757533	0.446081	0.769946	0.879435	0.936952	0.93462	0.58656	0.908958	0.996797
2513020870	Bti_pBT679_4.23	560	RPL	GGCTCATGTTTGTTCAACA..TTACAACAGCAAACGTACA	GCTTCATGTTTGTTCAACA..TTTACAACAGCAAACGTAC	0	0	0	0	0	0	1	1	0	0	0	0	0	0	0	0	0	0	0	0	0	0	0	0	0	0	0	0	0.587693	0.462225	0.112711	0.435804	0.354734	0.951052	0.93462	0.402405	0.908958	0.996797
2513020870	Bti_pBT679_4.23	563	RPL	TCATGTTTGTTCAACACCA..TTACAACAGCAAACGTACA	TAATGTTTGTTCAACACCA..TTTACAACAGAAAACGTAC	0	0	0	0	0	0	0	0	0	0	0	0	0	0	0	0	0	0	1	0	0	0	0	0	0	0	0	0	0.00578196	0.658744	0.446608	0.778511	0.898179	0.682271	0.93462	0.58656	0.908958	0.996797
2513020870	Bti_pBT679_4.23	564	RPL	CATGTTTGTTCAACACCAG..TTACAACAGCAAACGTACA	CTTGTTTGTTCAACACCAG..TTTACAACAGCAAACGTAC	0	0	0	0	0	0	0	1	0	0	0	0	0	0	0	0	0	0	0	0	0	0	0	1	0	0	0	0	0.353645	0.480841	0.839015	0.212381	0.993526	0.936952	0.93462	0.888533	0.7522	0.996797
2513020870	Bti_pBT679_4.23	565	RPL	ATGTTTGTTCAACACCAGA..TTACAACAGCAAACGTACA	AGGTTTGTTCAACACCAGA..TTTACAACAGCAAACGTAC	0	0	0	1	0	0	1	0	0	0	0	0	0	0	0	0	0	0	0	0	0	0	0	0	0	0	0	0	0.589834	0.363949	0.124321	0.754817	0.523092	0.951052	0.93462	0.416569	0.908958	0.996797
2513020870	Bti_pBT679_4.23	566	RPL	TGTTTGTTCAACACCAGAA..TTACAACAGCAAACGTACA	TTTTTGTTCAACCCCAGAA..TTTACAACAGCAAACGTAC	0	0	0	0	0	0	0	0	0	0	0	0	0	0	0	0	1	0	0	0	0	0	0	0	0	0	0	0	0.461517	0.239827	0.435805	0.505808	0.714426	0.936952	0.93462	0.583141	0.908958	0.996797
2513020870	Bti_pBT679_4.23	568	RPL	TTTGTTCAACACCAGAAGG..TTACAACAGCAAACGTACA	TGGTTTCAACACCAGAAGG..TTTACAACAGCAAACGTAC	0	0	0	1	0	0	0	0	0	0	0	0	0	0	0	0	0	0	0	0	0	0	0	0	0	0	0	0	0.236051	0.388488	0.291009	0.783611	0.54474	0.936952	0.93462	0.465922	0.908958	0.996797
2513020870	Bti_pBT679_4.23	569	RPL	TTGTTCAACACCAGAAGGT..TTACAACAGCAAACGTACA	TGTTTCAACACCAGAAGGT..TTTACAACAGCAAACGTAC	0	0	0	0	0	0	0.117647	0	0	0	0	0	0	0	0.75	0	0	1	0	0	0	0	0	0	0	0	0	0	0.352687	0.69901	0.286792	0.186276	0.408331	0.936952	0.93462	0.465922	0.695071	0.996797
2513020870	Bti_pBT679_4.23	570	RPL	TGTTCAACACCAGAAGGTG..TTACAACAGCAAACGTACA	TTTCCACCCCCAGAAGGTG..TTTTCAACAGCAAACTTAC	0	0	0	1	0	0	0	0	0	0	1	0	0	0	0	0	0	0	0	0	0	1	0	1	0	0	0	0	0.585993	0.485864	0.762957	0.704937	0.19254	0.951052	0.93462	0.84623	0.908958	0.996797
2513020870	Bti_pBT679_4.23	572	RPL	TTCAACACCAGAAGGTGTT..TTACAACAGCAAACGTACA	TCCAACACCAGAAGGTGTT..TTTACAACAGCAAACGTAC	0	0	0	1	0	0	1	0	0	0	0	0	0	0	0	1	1	0	0	0	0	0	0	0	0	0	0.8	0	0.924907	0.648662	0.97354	0.565064	0.538087	0.980485	0.93462	0.98137	0.908958	0.996797
2513020870	Bti_pBT679_4.23	573	RPL	TCAACACCAGAAGGTGTTG..TTACAACAGCAAACGTACA	TAACCCCCAGAAGGTGTTG..TTTACAACAGCAAACGTAC	0	0	0	0	0	0	0	1	0	0	0	0	0	0	0	1	0	0	0	0	0	0	0	0	0	0	0	0	0.906961	0.311815	0.840606	0.670356	0.40293	0.974463	0.93462	0.888533	0.908958	0.996797
2513020870	Bti_pBT679_4.23	575	RPL	AACACCAGAAGGTGTTGTG..TTACAACAGCAAACGTACA	ACCCCCAGAAGGTGTTGTG..TTTACAACAGCAAACGTAC	0	0	0	1	0	1	1	1	0	0	0	0	0	0	0	0	1	0	0	0	1	0	0	1	0	0	0	0	0.889975	0.526889	0.411746	0.18164	0.785306	0.970972	0.93462	0.561297	0.689865	0.996797
2513020870	Bti_pBT679_4.23	577	RPL	CACCAGAAGGTGTTGTGTT..TTACAACAGCAAACGTACA	CTCCAGTTGGTGTTGTGTT..TTTACAACAGCAAACGTAC	1	1	0	1	0	1	0.181818	0.324324	0	1	1	1	1	1	0.75	0.162162	1	1	1	1	0.274194	1	0	0.195122	0	0	0.75	0	0.283402	0.303757	0.0676613	0.145027	0.288206	0.936952	0.93462	0.310252	0.623885	0.996797
2513020870	Bti_pBT679_4.23	583	RPL	AAGGTGTTGTGTTATTCTT..TTACAACAGCAAACGTACA	AGGTTGTTGTGTTATTTTA..TTTACAACAGCAAACGTAC	1	0	0	1	1	1	1	0.193548	0	0	0	0	0	0	0	0	0	0	0	0	0	1	0	0	0	0	0.9	0	0.469121	0.375598	0.0566497	0.733642	0.0381701	0.936952	0.93462	0.27308	0.908958	0.751348
2513020870	Bti_pBT679_4.23	584	RPL	AGGTGTTGTGTTATTCTTA..TTACAACAGCAAACGTACA	ATGTGTTTTTTTATTTTAC..TTTACAACAGCAAACGTAC	0	0	0	0	0	0	0	0	0	0	0	1	0	0	0	0	0	0	0	1	0	0	0	0	0	0	0	0	0.998901	0.47285	0.843634	0.89441	0.521154	0.999918	0.93462	0.888533	0.923896	0.996797
2513020870	Bti_pBT679_4.23	585	RPL	GGTGTTGTGTTATTCTTAC..TTACAACAGCAAACGTACA	GTTGTTGTGTTATCTTACG..TTTACAACAGCAAACGTAC	0	1	0	1	0	0	1	0	0	1	0	0	0	0	0.75	0	1	1	0	0	0	0	0	1	0	0	0.875	0	0.78292	0.697322	0.801529	0.505877	0.552957	0.951052	0.93462	0.876917	0.908958	0.996797
2513020870	Bti_pBT679_4.23	586	RPL	GTGTTGTGTTATTCTTACG..TTACAACAGCAAACGTACA	GGTTTGTGTTATTTTACGC..TTTACAACAGCAAACGTAC	0	1	0	1	0	0	0	1	0	0	0	0	0	0	0	0	0	0	0	0	0	0	0	0	0	0	0.833333	0	0.999918	0.37222	0.145529	0.952253	0.113029	0.999918	0.93462	0.43775	0.967695	0.939393
2513020870	Bti_pBT679_4.23	587	RPL	TGTTGTGTTATTCTTACGCGTTTACAACAGCAAACGTACA	TTTTGTGTTATTTTACGCG..TTTACAACAGCAAACGTAC	0	0	0	1	0	0	1	0	0	0	0	0	1	0	0.8	1	0	1	0	1	1	1	0	1	0	0	0.875	0	0.599137	0.715489	0.295597	0.590573	0.741683	0.951052	0.93462	0.465922	0.908958	0.996797
2513020870	Bti_pBT679_4.23	588	RPL	GTTGTGTTATTCTTACGCGTTTACAACAGCAAACGTACA	GGTGTGTTATTTTACGCGTTTACAACAGCAAACGTAC	0	0	0	0	0	0	0	0	0	0	0	0	0	0	0	0	0	0	0	0	0	0	0	1	0	0	0	0	0.338768	0.727688	0.42324	0.319191	0.519148	0.936952	0.93462	0.570388	0.889006	0.996797
2513020870	Bti_pBT679_4.23	589	RPL	TTGTGTTATTCTTACGCGTTTACAACAGCAAACGTACAAC	TGGTGTTATCTTACGCGTT..TACAACAGCAACCGTACAA	0	1	0	1	0	0	1	1	0	0	0	0	0	0	0	0.114286	0	0	1	1	0	1	0	0	0	0	0.875	0	0.659455	0.171151	0.646501	0.618064	0.478345	0.951052	0.93462	0.757897	0.908958	0.996797
2513020870	Bti_pBT679_4.23	590	RPL	TGTGTTATTCTTACGCGTTTACAACAGCAAACGTACA	TTGGTTATTTTACGCGTTT..TTTACAACAGCAAACGTAC	0	1	0	0	0	1	0	1	0	1	0	0	0	0	0.833333	0	1	0	0	1	1	0	0	0	0	0	0.875	0	0.593974	0.819491	0.820828	0.514521	0.381238	0.951052	0.93462	0.885978	0.908958	0.996797
2513020870	Bti_pBT679_4.23	591	RPL	GTGTTATTCTTACGCGTTTACAACAGCAAACGTACA	GGGTTATTTTACGCGTTTA..TTTACAACAGCAAACGTAC	0	0	0	1	0	0	0	0	0	0	0	0	0	0	0	0	0	0	0	1	1	0	0	0	0	0	0.875	0	0.160219	0.377116	0.533393	0.993979	0.746397	0.936952	0.93462	0.666298	0.993979	0.996797
2513020870	Bti_pBT679_4.23	592	RPL	TGTTATTCTTACGCGTTTACAACAGCAAACGTACAAC	TTTTATTTTACGCGTATAC..TACAACAGCAAACGTACAA	1	0	0	1	0	0	0	1	0	0	0	0	0	0	0.152174	1	1	0	1	1	1	0.0833333	0	1	0	0	0	0	0.0523691	0.227324	0.484329	0.0603374	0.93572	0.936952	0.93462	0.613157	0.623885	0.996797
2513020870	Bti_pBT679_4.23	594	RPL	TTATTCTTACGCGTTTACAACAGCAAACGTACA	TGATTTTACGCGTTAACAACAGCAAACGTAC	0	0	0	0	0	0	0	0	0	0	0	0	0	0	0	0	0	0	0	0	0	0	0	0	0	0	0.75	0	NA	NA	0.408666	0.144827	0.464012	NA	NA	0.561297	0.623885	0.996797
2513020870	Bti_pBT679_4.23	595	RPL	TATTCTTACGCGTTTACAACAGCAAACGTACAAC	TTTTTTACGCGTTTACAAC..TACAACAGAAAACGTGCAA	1	1	0	1	1	1	1	1	1	0.0361446	0	0	0	0	0	0	1	0	1	1	0	1	0	1	0	0	0.875	0	0.947795	0.105578	0.115728	0.0820583	0.09145	0.987693	0.93462	0.40667	0.623885	0.92644
2513020870	Bti_pBT679_4.23	596	RPL	ATTCTTACGCGTTTACAACAGCAAACGTACA	ACCTTACGCGTTTACAACA..TTTCCAACAGCAAACGTAC	0	0	0	0	0	0	0	1	0	1	0	0	0	0	0	1	0	0	0	1	1	1	0	0	0	0	0	0	0.984367	0.23522	0.638045	0.16328	0.417429	0.994152	0.93462	0.753942	0.653121	0.996797
2513020870	Bti_pBT679_4.23	597	RPL	TTCTTACGCGTTTACAACAGCAAACGTACA	TCTTACGCGTTTACAACAG..TTTACAACAGCAAACGTAC	0.891256	0.358714	0.979253	0.827166	0.323853	0.479075	0.772004	0.680336	0.973563	0.908344	0.925031	0.964471	0.97328	0.969199	0.761819	0.983563	0.98648	0.928392	0.841908	0.718272	0.483547	0.60807	0	0.901351	0	0	0.3508	0	0.517677	0.824826	0.0191246	0.143149	0.0826026	0.951052	0.93462	0.130743	0.623885	0.92644
2513020870	Bti_pBT679_4.23	598	RPL	TCTTACGCGTTTACAACAGCAAACGTACA	TTTACGCGTTTACAACAGC..TTTACAACAGCAAACGTAC	0.770811	0.759935	1	0.918768	0.498753	0.522613	0.7103	0.88717	1	0.743942	1	1	0.868475	1	0.845789	0.69126	0.782544	1	0.912756	0.820896	0.831466	0.920635	0	0.783917	0	0	0.658759	0	0.409948	0.543286	0.0199054	0.180751	0.239596	0.936952	0.93462	0.13365	0.689865	0.996797
2513020870	Bti_pBT679_4.23	610	RPL	ACAACAGCAAACGTACAAC	AACACAGCAAACGTACAC,AAAACAGCAAACGTACAA	0	0	0	0	0	0	0	0	0	0.0361446	0	0	0	0	0	0	0	0	0	0	1	0	0	0	0	0	0	0	0.185226	0.752078	0.468551	0.746563	0.898178	0.936952	0.93462	0.599235	0.908958	0.996797
2513020870	Bti_pBT679_4.23	612	RPL	AACAGCAAACGTACA	ACCACCAAACGTAC,ACCA..GTAC,ACCAGCAACCGTAC	0	1	0	1	0	1	0	0	0	1	0	0	0	0	0	0	0	0	0	0	0	0	0	0	0	0	0	0	0.765033	0.531279	0.0159806	0.483563	0.194052	0.951052	0.93462	0.117818	0.908958	0.996797
2513020870	Bti_pBT679_4.23	613	RPL	ACAGCAAACGTACA	AAAACAAACGTAC	0	0	0	0	0	1	0	0	0	0	0	0	0	0	0	0	0	0	0	0	0	0	0	0	0	0	0	0	0.780073	NA	0.298511	0.866515	0.761834	0.951052	NA	0.465922	0.910694	0.996797
2513020870	Bti_pBT679_4.23	614	RPL	CAGCAAACGTACA	CCCCAAACGTAC	0	0	0	0	0	0	0	0	0	0	0	0	0	0	0	0	0	0	0	0	0	0	0	0	0	0	0.8	0	NA	NA	0.408666	0.144827	0.464012	NA	NA	0.561297	0.623885	0.996797
2513020870	Bti_pBT679_4.23	615	RPL	AGCAAACGTACA	AACAAACCTAC,ACAAAAC..AACGTAC,AACAGACGTAC	1	1	0	1	1	1	1	1	0	0	0	0	0	0	0	0	0	0	0	1	0	0	0	0	0	0	0.8	0	0.606209	0.331936	0.00356326	0.291975	0.0046433	0.951052	0.93462	0.0934503	0.858679	0.292945
2513020870	Bti_pBT679_4.23	616	RPL	GCAAACGTACA	GAAAGCGTAC,GAAAACGT..AACCGTAC,GGAAACGTAC	1	0	0	0	0.0958904	0	1	1	0	1	0	0	0	0	0	0	0	0	0	0	1	1	0	0	0	0	0.833333	0	0.681518	0.314602	0.346245	0.368846	0.418329	0.951052	0.93462	0.514578	0.908958	0.996797
2513020870	Bti_pBT679_4.23	619	RPL	AACGTACA	ACCGAAC,AGCGTAC,ACCGTAC,ACCTTAC,ACCCTCC	1	1	0	0	1	1	1	0	0	1	0	0	0	0	0.857143	0	1	0	1	0	1	0	0	1	0	0	0	0	0.0629138	0.732547	0.300118	0.047496	0.530928	0.936952	0.93462	0.4663	0.623885	0.996797
2513020870	Bti_pBT679_4.23	620	RPL	ACGTACA	AACGTAC	0	0	0	1	0	0	0	0	0	0	0	0	0	0	0	0	0	0	0	0	0	0	0	0	0	0	0	0	0.236051	0.388488	0.291009	0.783611	0.54474	0.936952	0.93462	0.465922	0.908958	0.996797
2513020870	Bti_pBT679_4.23	621	RPL	CGTACA	CTTAC,CTAAC,CTGAC,CCGTCC,CATCG	0	0	0	0	1	1	1	1	0	1	0	0	0	0	0.75	1	0	0	0	0	1	0	0	0	0	0	0	0	0.221245	0.298355	0.141677	0.131317	0.0698809	0.936952	0.93462	0.429861	0.623885	0.920428
2513020870	Bti_pBT679_4.23	621	RPL	CGTACA	CCTTAC	0	0	0	0	0	0	1	0	0	0	0	0	0	0	0	0	0	0	0	0	0	0	0	0	0	0	0	0	0.671906	0.696929	0.295112	0.770392	0.703149	0.951052	0.93462	0.465922	0.908958	0.996797
2513020870	Bti_pBT679_4.23	622	RPL	GTACA	GCAC	1	0	0	0	0	0	0	0	0	0	0	0	0	0	0	0	0	0	0	0	0	0	0	0	0	0	0.8	0	0.179451	0.767905	0.707944	0.397249	0.0723268	0.936952	0.93462	0.801768	0.908958	0.920428
2513020870	Bti_pBT679_4.23	623	RPL	TACA	TCC,TGC	0	1	0	0	1	1	0	0	0	0	0	0	0	0	0	0	0	0	0	1	1	1	0	0	0	0	0.933333	0	0.943922	0.731804	0.9635	0.765899	0.362146	0.987693	0.93462	0.97386	0.908958	0.996797
2513020870	Bti_pBT679_4.23	624	RPL	ACAAC	AAAA,AATA	0.0909091	0.114286	0	0	0.0704225	0.0714286	0.134615	0	0	0.0361446	0	0	0	0	0	0	0.15625	0.148148	0.114286	0	0.0625	0.131579	0	0.175	0	0	0.115385	0	0.761142	0.828978	0.639648	0.260923	0.566082	0.951052	0.93462	0.753942	0.824427	0.996797
2513020870	Bti_pBT679_4.23	625	DEL	CA	C	1	1	0	1	1	1	1	1	1	1	1	1	1	1	0.995745	1	1	1	1	1	1	1	0	1	0	0	0.997028	0	0.281309	0.529374	0.0148569	0.11195	0.634157	0.936952	0.93462	0.114847	0.623885	0.996797
2513020870	Bti_pBT679_4.23	625	RPL	CAA	CC,CG	0.133333	0	0	0	0	0.137931	0.0909091	0	0.115385	0.105263	0.115385	0.151515	0.206897	0	0.2	0	0.2	0	0	0.1875	0.291667	0.1875	0	0	0	0	0.45	0	0.296814	0.750751	0.921457	0.845106	0.99506	0.936952	0.93462	0.941553	0.910694	0.996797
2513020870	Bti_pBT679_4.23	626	RPL	AACG	AGG,AGT,AGA,ACT	0	0	0	0	0	0.0344828	0	0	0	0	0	0	0	0	0	0	0.0533333	0	0	0.0625	0.0509554	0	0	0.0576923	0	0	0.0422535	0	0.786933	0.938609	0.139289	0.658136	0.938454	0.951052	0.980387	0.429285	0.908958	0.996797
2513020870	Bti_pBT679_4.23	627	DEL	AC	A	0.69697	0.827298	0	0.709589	0.643243	0.790885	0.726444	0.793388	0.719512	0.68	0.690402	0.709091	0.71831	0.665428	0.746667	0.823864	0.824675	0.805085	0.79402	0.844282	0.756757	0.758242	0	0.746154	0	0	0.88642	0	0.299475	0.445613	0.0524843	0.110331	0.739968	0.936952	0.93462	0.256287	0.623885	0.996797
2513020870	Bti_pBT679_4.23	2769	INS	T	TA	0	0	0	0.103448	0	0	0	0	0	0	0	0	0	0	0	0	0	0	0	0	0	0	0	0	0	0	0	0	0.236051	0.388488	0.291009	0.783611	0.54474	0.936952	0.93462	0.465922	0.908958	0.996797
2513020870	Bti_pBT679_4.23	2771	INS	A	AC,AT,AG	0	0	0	0.133333	0	0.166667	0.0909091	0.102041	0	0	0	0	0	0	0	0	0	0	0	0	0	0	0	0	0	0	0	0	0.583907	0.236762	0.0206627	0.462075	0.245931	0.951052	0.93462	0.136074	0.908958	0.996797
2513020871	Bti_pBT679_8_1.24	4445	DEL	TA	T	0.533333	0.669725	0	0.555556	0.517949	0.66129	0.651376	0.7	0.705882	0.697674	0.763889	0.634921	0.716216	0.656051	0.728643	0.770492	0.70625	0.719626	0.748792	0.746269	0.724696	0.768924	0	0.776744	0	0	0.720755	0	0.413467	0.538328	0.069329	0.155628	0.44203	0.936952	0.93462	0.314069	0.636047	0.996797
2513020871	Bti_pBT679_8_1.24	4449	DEL	CT	C	1	0.997748	1	1	1	1	1	1	1	1	1	1	1	1	1	1	1	1	1	1	1	1	0	1	0	0	1	0	0.278623	0.528908	0.0150368	0.112367	0.633753	0.936952	0.93462	0.114847	0.623885	0.996797
2513020871	Bti_pBT679_8_1.24	4449	RPL	CTCCAGCGGT	CCCGGCGGT,CCCAGCGGG,CCCAGCGGA	0	0.025641	0	0	0	0	0	0	0	0	0	0	0	0	0	0	0	0	0	0	0.0168539	0.0545455	0	0	0	0	0.0046132	0	0.392053	0.682735	0.600268	0.690224	0.519934	0.936952	0.93462	0.719273	0.908958	0.996797
2513020871	Bti_pBT679_8_1.24	5436	RPL	GACAACAT	GGGAAAAA	0	0	0	0	0	0	0	0	0	0.714286	0	0	0	0	0	0	0	0	0	0	0	0	0	0	0	NA	0	0	0.930062	0.892057	0.267994	0.242077	0.188887	0.980849	0.963202	0.465922	0.791486	0.996797
2513020871	Bti_pBT679_8_1.24	5455	RPL	TACGGTATGCTTTCTCTAT..ATCTTCAAAAATCGCTTCT	TCCGTTATGCTTTCTCTAT..TATCTTCAAAAATCGCTTC	0	0	NA	0	0	0	0	0	0	0.428571	0	0	0	0	0	0	0	0	0	0.75	0	0	0	0	0	NA	0	0	0.806501	0.783238	0.853301	0.565918	0.708774	0.951052	0.93462	0.89403	0.908958	0.996797
2513020871	Bti_pBT679_8_1.24	5503	DEL	TC	T	0	0	0	0	0	0	0	0	0	0.333333	0	0	0	0	0	0	0	0	0	0.666667	0	0	0	0	0	0	0	0	0.851285	0.728878	0.822357	0.572035	0.747429	0.953572	0.93462	0.885978	0.908958	0.996797
2513020871	Bti_pBT679_8_1.24	5504	DEL	CT	C	1	1	0	0.977778	0	0	1	0	0	0.890909	0	1	0	0.929825	0.966667	0.947368	1	0	0.973684	0.978495	0.978261	1	0	1	0	0	0	0	0.153413	0.376534	0.685019	0.105067	0.463121	0.936952	0.93462	0.787667	0.623885	0.996797
2513020871	Bti_pBT679_8_1.24	5504	DEL	CTT	C	0	0	0	0	0	0	0	0	0	0	0	0	0	0	0	0	0	0	0	0.666667	0	0	0	0	0	0	0	0	0.854294	0.77525	0.44772	0.816727	0.915892	0.953572	0.93462	0.58656	0.910694	0.996797
2513020871	Bti_pBT679_8_1.24	5513	DEL	TC	T	0	0	0	0	0	0	0	0	0	0.4	0	0	0	0.5	0	0	0	0	0.6	0.857143	0	0	0	0	0	0	0	0	0.484006	0.702818	0.870643	0.838649	0.1281	0.936952	0.93462	0.906819	0.910694	0.962237
2513020872	Bti_pBT679_8_2.25	7845	INS	T	TG,TA	0.0820106	0.0892532	0.0884354	0	0	0.049635	0.0455635	0.0515098	0.0355221	0.0371936	0.0463158	0.0453297	0.0444444	0.0555556	0.0833333	0.0768293	0.087346	0.0926518	0.0784314	0	0	0.0915805	0	0.0561661	0	0	0	0	0.772094	0.992609	0.334668	0.0255453	0.417783	0.951052	0.995667	0.499346	0.623885	0.996797
2513020872	Bti_pBT679_8_2.25	7967	INS	C	CG	0.323404	0.295117	0.322581	0	0.0106257	0.328427	0.214055	0.281214	0.251449	0.219185	0.263054	0.304348	0.334144	0.352758	0.347305	0.337931	0.370702	0.368564	0.334477	0	0	0.397766	0	0.27769	0	0	0.131	0	0.973421	0.658124	0.100838	0.192699	0.158813	0.994152	0.93462	0.37915	0.703446	0.996797
2513020877	Bti_pBT679_18_1.30	15398	DEL	GC	G	0.0464037	0.0472362	0	0.032381	0.0124224	0.0356255	0.0483559	0.0288858	0.0515971	0.0882145	NA	NA	NA	NA	NA	NA	NA	NA	NA	NA	NA	NA	NA	NA	0	NA	NA	0	0.774451	0.279735	0.0299449	0.551852	NA	0.951052	0.93462	0.175926	0.908958	NA
2513020878	Bti_pBt679_11_3.31	1284	RPL	CTAACGGGC	CCTAAGGGCT,CCCTAGGG..GGGGCT,CCCTGAGGGGCT	0	0	NA	1	0	0	0	0	0	0	1	1	1	1	1	1	0	0	1	0	0	1	0	1	0	0	1	0	0.255518	0.616442	0.804618	0.308222	0.0487924	0.936952	0.93462	0.876917	0.877966	0.86897
2513020878	Bti_pBt679_11_3.31	1377	DEL	TC	T	1	0.998608	1	1	1	0.998812	0.998717	0.998229	1	1	1	1	1	1	1	1	1	1	1	0	0	1	0	0.99883	0	0	0.999114	0	0.683603	0.791162	0.00361685	0.217017	0.797779	0.951052	0.93462	0.0934503	0.7522	0.996797
2513020878	Bti_pBt679_11_3.31	3345	INS	C	CT	0	0	0	0.811609	0.822222	0.845679	0	0.820827	0.814181	0.85348	0.822923	0.805008	0.835692	0.80015	0.807841	0.791014	0.79524	0.832038	0.830092	0	0	0.793209	0	0.82866	0	0	0.817899	0	0.719091	0.958968	0.10606	0.822785	0.146038	0.951052	0.984131	0.390966	0.910694	0.993062

## Sheet: Comments
Comments
Variation type: DEL, deletion; RPL, replacement; INS, insertion
Reference sequence: sequence in MYBT18679 genome
Variant sequence: sequence found in evolved population
