# Supplementary material for: Host–Pathogen Coevolution: The Selective Advantage of Bacillus thuringiensis Virulence and Its Cry Toxin Genes
Source: PLoS Biol. 2015 Jun 4;13(6):e1002169. doi: 10.1371/journal.pbio.1002169 (PMC4456383; doi:10.1371/journal.pbio.1002169)
Supplement: S19 Table — Table is presented as an Excel file. (XLSX) [file pbio.1002169.s033.xlsx]

## Sheet: ThetaW
			Transfer 12													Transfer 20														Uncorrected p-values					FDR corrected p-values (q-values)
			Coevolution replicate population									One-sided adaptation populations				Coevolution replicate population										One-sided adaptation populations				Linear Regression Analysis		ANOVA AlleleFrequency~Generation+Treatment[Replicate]+Generation*Treatment[Replicate]			Linear Regression Analysis		ANOVA AlleleFrequency~Generation+Treatment[Replicate]+Generation*Treatment[Replicate]
Chromosome	StartWindow	EndWindow	1	2	4	5	6	7	8	9	10	2	3	4	6	1	2	3	4	5	6	7	8	9	10	3	4	6	9	Killing Ability	Infection Load	Transfer	Treatment	Treatment*Transfer	Killing Ability	Infection Load	Transfer	Treatment	Treatment*Transfer
2513020848	1	10000	0	0	0	0.307433	0.155851	0.279224	0	0	0	0	0.157398	0.152383	0.160207	0	0.298667	0	0	0	0.287083	0	0	0.42598	0.146247	0	0	0	0	0.243501	0.385842	0.307919	0.812772	0.637115	0.279191	0.440824	0.377739	0.872572	0.700419
2513020848	5001	15000	0	0	0	0.307433	0	0.139057	0	0	0	0	0.157398	0	0.160207	0	0.147214	0	0	0	0.144141	0	0	0.283737	0.146247	0	0	0	0	0.241192	0.384924	0.306044	0.81643	0.630679	0.279191	0.440824	0.377739	0.872572	0.700419
2513020848	10001	20000	0	0	0	0.163283	0	0	0	0	0	0	0.157398	0	0.160207	0	0.147214	0	0	0	0.144141	0	0	0.283737	0.146247	0	0	0	0	0.240578	0.385673	0.310217	0.81743	0.632278	0.279191	0.440824	0.377739	0.872572	0.700419
2513020848	15001	25000	0	0	0	0	0	0	0	0	0	0	0	0	0	0	0	0	0	0	0	0	0	0	0	0	0	0	0	0.236051	0.388488	0.309227	0.816099	0.623295	0.279191	0.440824	0.377739	0.872572	0.700419
2513020848	20001	30000	0	0	0	0	0	0	0	0	0	0	0	0	0	0	0	0	0	0	0	0	0	0	0	0	0	0	0	0.236051	0.388488	0.309227	0.816099	0.623295	0.279191	0.440824	0.377739	0.872572	0.700419
2513020848	25001	35000	0.188048	0.180618	0	0.183023	0.172246	0.155993	0.319189	0.175129	0.164793	0.453264	0.159942	0.156645	0.156645	0.169555	0.17116	0.157944	0.178224	0.31495	0.445558	0.148379	0.159084	0.152267	0.163492	0.178642	0.483634	0.14047	0.133862	0.236224	0.390339	0.312036	0.814871	0.625429	0.279191	0.440824	0.377739	0.872572	0.700419
2513020848	30001	40000	0.188048	0.180618	0	0.183023	0.172246	0.155993	0.319189	0.175129	0.164793	0.453264	0.159942	0.31285	0.156645	0.169555	0.17116	0.157944	0.178224	0.31495	0.592231	0.295753	0.159084	0.152267	0.163492	0.178642	0.483634	0.14047	0.268649	0.235683	0.392586	0.312603	0.819412	0.625861	0.279191	0.440824	0.377739	0.872572	0.700419
2513020848	35001	45000	0.188048	0.180618	0	0.183023	0.172246	0.155993	0.319189	0.175129	0.164793	0.453264	0.159942	0.31285	0.156645	0.169555	0.17116	0.157944	0.178224	0.31495	0.592231	0.295753	0.159084	0.152267	0.163492	0.178642	0.483634	0.14047	0.268649	0.235639	0.393109	0.313037	0.819833	0.626192	0.279191	0.440824	0.377739	0.872572	0.700419
2513020848	40001	50000	0	0.150659	0.144578	0	0.145843	0	0	0	0	0	0	0.150926	0	0	0	0	0	0	0.276205	0.141775	0	0.140356	0.142765	0	0	0	0.135376	0.238142	0.389026	0.308207	0.819104	0.618645	0.279191	0.440824	0.377739	0.872572	0.700419
2513020848	45001	55000	0	0.150659	0.144578	0	0.145843	0	0	0	0	0	0	0	0	0	0	0	0	0	0.137718	0	0	0.140356	0.142765	0	0	0.14067	0	0.240715	0.384454	0.307787	0.815588	0.611249	0.279191	0.440824	0.377739	0.872572	0.700419
2513020848	50001	60000	0	0.150659	0.144578	0	0.145843	0	0	0	0	0	0	0	0	0	0	0	0	0	0.137718	0	0	0.139505	0.142765	0	0	0.14067	0	0.244611	0.381203	0.30667	0.815139	0.601453	0.279191	0.440824	0.377739	0.872572	0.700419
2513020848	55001	65000	0	0	0	0	0	0	0	0	0	0	0	0	0	0	0	0	0	0	0	0	0	0	0	0	0	0.14067	0	0.236051	0.388488	0.317271	0.833168	0.610529	0.279191	0.440824	0.377739	0.872572	0.700419
2513020848	60001	70000	0	0	0	0.150659	0	0.144763	0	0	0	0	0	0	0	0	0	0	0	0	0	0	0	0	0	0	0	0	0.143404	0.241125	0.383016	0.300888	0.838139	0.594508	0.279191	0.440824	0.377739	0.872572	0.700419
2513020848	65001	75000	0	0	0	0.150659	0	0.144763	0	0	0	0	0	0	0	0	0	0	0	0	0.279386	0.140584	0	0.142246	0.144358	0	0	0	0.274595	0.243716	0.3724	0.325561	0.844917	0.602005	0.279191	0.440824	0.377739	0.874357	0.700419
2513020848	70001	80000	0	0	0	0.150659	0	0.144763	0	0	0	0	0	0	0	0	0	0	0	0	0.279386	0.140584	0	0.142246	0.144358	0	0	0	0.274595	0.242798	0.374224	0.323614	0.841723	0.604437	0.279191	0.440824	0.377739	0.872572	0.700419
2513020848	75001	85000	0	0	0	0	0	0	0	0	0	0	0	0	0	0	0	0	0	0	0.279386	0.140584	0	0.142246	0.144358	0	0	0	0.132998	0.238997	0.380251	0.322751	0.826449	0.62031	0.279191	0.440824	0.377739	0.872572	0.700419
2513020848	80001	90000	0	0	0	0	0	0	0	0	0	0	0	0	0	0	0	0	0	0	0	0	0	0	0	0	0	0	0	0.236051	0.388488	0.309227	0.816099	0.623295	0.279191	0.440824	0.377739	0.872572	0.700419
2513020848	85001	95000	0	0	0.152325	0	0	0	0	0	0	0	0	0	0	0	0	0	0	0	0	0	0	0	0	0	0	0	0	0.236051	0.388488	0.306366	0.813497	0.618931	0.279191	0.440824	0.377739	0.872572	0.700419
2513020848	90001	100000	0.174069	0.165476	0.314036	0.144763	0.165592	0.155851	0.166914	0.161781	0.154488	0.150926	0.161878	0.161781	0.158587	0.156868	0.15557	0.150819	0.160657	0.156943	0.148946	0.148566	0.157552	0.149334	0.150553	0.162871	0.161878	0.143064	0.140356	0.23573	0.388808	0.304444	0.811609	0.619221	0.279191	0.440824	0.377739	0.872572	0.700419
2513020848	95001	105000	0.174069	0.165476	0.314036	0.16277	0.165592	0.155851	0.166914	0.161781	0.154488	0.150926	0.161878	0.161781	0.158587	0.156868	0.15557	0.150819	0.160657	0.156943	0.148946	0.148566	0.157552	0.149334	0.150553	0.162871	0.161878	0.143064	0.140356	0.235748	0.38879	0.305334	0.812569	0.619964	0.279191	0.440824	0.377739	0.872572	0.700419
2513020848	100001	110000	0.174069	0.165476	0.163387	0.16277	0.165592	0.155851	0.166914	0.161781	0.154488	0.150926	0.161878	0.161781	0.158587	0.156868	0.15557	0.150819	0.160657	0.156943	0.148946	0.148566	0.157552	0.149334	0.150553	0.162871	0.161878	0.143064	0.140356	0.235833	0.388705	0.308015	0.815014	0.623333	0.279191	0.440824	0.377739	0.872572	0.700419
2513020848	105001	115000	0	0	0	0	0	0	0	0	0	0	0	0	0	0	0	0	0	0	0	0	0	0	0	0	0	0	0	0.236051	0.388488	0.309227	0.816099	0.623295	0.279191	0.440824	0.377739	0.872572	0.700419
2513020848	110001	120000	0	0	0	0	0	0	0	0	0	0	0	0	0	0	0	0	0	0	0	0	0	0	0	0	0	0	0	0.236051	0.388488	0.309227	0.816099	0.623295	0.279191	0.440824	0.377739	0.872572	0.700419
2513020848	115001	125000	0	0	0	0	0	0	0	0	0	0	0	0	0	0	0	0	0	0	0.145294	0	0	0	0	0	0	0	0.141683	0.237334	0.38687	0.312132	0.821634	0.61925	0.279191	0.440824	0.377739	0.872572	0.700419
2513020848	120001	130000	0	0	0	0	0	0	0	0	0	0	0	0	0	0	0	0	0	0	0.145294	0.141438	0	0	0	0	0	0	0.141683	0.23537	0.38657	0.315301	0.820626	0.619139	0.279191	0.440824	0.377739	0.872572	0.700419
2513020848	125001	135000	0	0	0	0	0	0	0	0	0	0	0	0	0	0	0	0	0	0	0.145294	0.141438	0	0	0	0	0	0	0.141683	0.235437	0.386759	0.314697	0.820181	0.619551	0.279191	0.440824	0.377739	0.872572	0.700419
2513020848	130001	140000	0	0	0	0	0	0	0	0	0	0	0	0	0	0	0	0	0	0	0	0.141775	0	0	0	0	0	0	0	0.234571	0.38797	0.312392	0.816107	0.622559	0.279191	0.440824	0.377739	0.872572	0.700419
2513020848	135001	145000	0	0	0	0.293321	0	0	0	0	0	0	0	0	0	0	0	0	0	0	0	0	0	0	0	0	0	0	0	0.235237	0.389324	0.305639	0.814377	0.62001	0.279191	0.440824	0.377739	0.872572	0.700419
2513020848	140001	150000	0	0	0	0.293321	0	0	0	0	0	0	0	0	0	0	0	0	0	0	0	0	0	0	0	0	0	0	0	0.234728	0.389872	0.304224	0.813189	0.618518	0.279191	0.440824	0.377739	0.872572	0.700419
2513020848	145001	155000	0	0	0	0.293321	0	0	0	0	0	0	0	0	0	0	0	0	0	0	0	0	0	0	0	0	0	0	0	0.234615	0.389996	0.303794	0.812937	0.618105	0.279191	0.440824	0.377739	0.872572	0.700419
2513020848	150001	160000	0	0	0	0	0	0	0	0	0	0	0	0	0	0	0	0	0	0	0	0	0	0	0	0	0	0	0	0.236051	0.388488	0.309994	0.816012	0.623829	0.279191	0.440824	0.377739	0.872572	0.700419
2513020848	155001	165000	0	0	0	0	0	0	0	0	0	0	0	0	0	0	0	0	0	0	0	0	0	0	0	0	0	0	0	0.236051	0.388488	0.309227	0.816099	0.623295	0.279191	0.440824	0.377739	0.872572	0.700419
2513020848	160001	170000	0	0	0	0	0	0	0	0	0	0	0	0	0	0	0	0	0	0	0	0	0	0	0	0	0	0	0	0.236051	0.388488	0.309227	0.816099	0.623295	0.279191	0.440824	0.377739	0.872572	0.700419
2513020848	165001	175000	0	0	0	0	0	0	0	0	0	0	0	0	0	0	0	0	0	0	0	0	0	0	0	0	0	0	0	0.236051	0.388488	0.309227	0.816099	0.623295	0.279191	0.440824	0.377739	0.872572	0.700419
2513020848	170001	180000	0	0	0	0	0	0	0	0	0	0	0	0	0	0	0	0	0	0	0	0	0	0	0	0	0	0	0	0.236051	0.388488	0.309227	0.816099	0.623295	0.279191	0.440824	0.377739	0.872572	0.700419
2513020848	175001	185000	0	0	0	0	0	0	0	0	0	0	0	0	0	0	0	0	0	0	0	0	0	0	0	0	0	0	0	0.236051	0.388488	0.309227	0.816099	0.623295	0.279191	0.440824	0.377739	0.872572	0.700419
2513020848	180001	190000	0	0	0	0	0	0	0	0	0	0	0	0	0	0	0	0	0	0	0	0.140873	0	0.141109	0	0	0	0	0	0.235331	0.386814	0.310451	0.816134	0.624134	0.279191	0.440824	0.377739	0.872572	0.700419
2513020848	185001	195000	0.158751	0	0.151808	0	0	0	0	0	0	0	0	0	0	0.155921	0	0.148379	0	0.152678	0	0.140873	0	0.288067	0.148946	0	0	0	0	0.230329	0.384769	0.312702	0.807921	0.621643	0.279191	0.440824	0.377739	0.872572	0.700419
2513020848	190001	200000	0.158751	0	0.151808	0	0	0	0	0	0	0	0	0	0	0.155921	0	0.148379	0	0.152678	0	0.140873	0	0.288067	0.148946	0	0	0	0	0.229584	0.384283	0.313165	0.806835	0.621422	0.279191	0.440824	0.377739	0.872572	0.700419
2513020848	195001	205000	0.158751	0	0.151808	0	0	0	0	0	0	0	0	0	0	0.155921	0	0.148379	0	0.152678	0	0	0	0.147564	0.148946	0	0	0	0	0.229732	0.385913	0.312064	0.805676	0.620148	0.279191	0.440824	0.377739	0.872572	0.700419
2513020848	200001	210000	0	0	0	0	0	0	0	0	0	0	0	0	0	0	0	0	0	0	0	0	0	0.146044	0	0	0	0	0	0.237164	0.386919	0.310644	0.816446	0.623106	0.279191	0.440824	0.377739	0.872572	0.700419
2513020848	205001	215000	0	0	0	0	0	0	0	0	0	0	0	0	0	0	0	0	0	0	0.141258	0	0	0.146044	0	0	0	0	0	0.237581	0.385916	0.312452	0.815453	0.623939	0.279191	0.440824	0.377739	0.872572	0.700419
2513020848	210001	220000	0	0	0	0	0	0	0	0	0	0	0	0	0	0	0	0	0	0	0.141258	0	0	0.146044	0	0	0	0	0	0.237541	0.385983	0.312367	0.815471	0.623922	0.279191	0.440824	0.377739	0.872572	0.700419
2513020848	215001	225000	0	0	0	0	0	0	0	0	0	0	0	0	0	0	0	0	0	0	0.141258	0	0	0	0	0	0	0	0	0.236338	0.387594	0.311088	0.81488	0.624315	0.279191	0.440824	0.377739	0.872572	0.700419
2513020848	220001	230000	0	0	0	0	0	0	0	0	0	0	0	0	0	0	0	0	0	0	0	0	0	0	0	0	0	0	0	0.236051	0.388488	0.309227	0.816099	0.623295	0.279191	0.440824	0.377739	0.872572	0.700419
2513020848	225001	235000	0	0	0	0	0	0	0	0	0	0	0	0	0	0	0	0	0	0	0	0	0	0	0	0	0	0	0	0.236051	0.388488	0.309227	0.816099	0.623295	0.279191	0.440824	0.377739	0.872572	0.700419
2513020848	230001	240000	0	0	0	0	0.142931	0.138623	0.146535	0	0.139319	0	0	0	0	0	0	0	0	0	0	0.139639	0	0	0	0	0	0	0	0.234232	0.384337	0.305791	0.816205	0.62314	0.279191	0.440824	0.377739	0.872572	0.700419
2513020848	235001	245000	0	0	0	0	0.142931	0.138623	0.146535	0	0.139319	0	0	0	0	0	0	0	0	0	0	0.139639	0	0	0	0	0	0	0	0.233874	0.383516	0.305113	0.816209	0.623068	0.279191	0.440824	0.377739	0.872572	0.700419
2513020848	240001	250000	0	0	0	0	0.142931	0.138623	0.146535	0	0.139319	0	0	0	0	0	0	0	0	0	0	0.139639	0	0	0	0	0	0	0	0.233279	0.382143	0.303981	0.816202	0.622917	0.279191	0.440824	0.377739	0.872572	0.700419
2513020848	245001	255000	0	0	0	0	0	0	0	0	0	0	0	0	0	0	0	0	0	0	0	0	0	0.140613	0	0	0	0	0	0.237677	0.386204	0.311296	0.8166	0.623019	0.279191	0.440824	0.377739	0.872572	0.700419
2513020848	250001	260000	0	0	0	0	0.148241	0.142897	0	0	0	0	0	0	0	0	0.146044	0	0.151922	0	0.139135	0.139884	0	0.281283	0.143646	0	0	0	0	0.239189	0.377143	0.321586	0.80943	0.626065	0.279191	0.440824	0.377739	0.872572	0.700419
2513020848	255001	265000	0	0	0	0	0.148241	0.142897	0	0	0	0	0	0	0	0	0.146044	0	0.151922	0	0.139135	0.139884	0	0.281283	0.143646	0	0	0	0	0.239852	0.374848	0.32418	0.80799	0.626607	0.279191	0.440824	0.377739	0.872572	0.700419
2513020848	260001	270000	0	0	0	0	0.148241	0.142897	0	0	0	0	0	0	0	0	0.28857	0	0.297038	0	0.275342	0.139884	0	0.276845	0.143646	0	0	0	0	0.241904	0.366967	0.337205	0.794341	0.636592	0.279191	0.440824	0.378281	0.872572	0.700419
2513020848	265001	275000	6.25409	6.11867	7.44011	6.05543	6.3228	6.64074	6.42629	7.49107	9.22301	6.2483	6.84488	6.38378	6.45342	5.13381	6.17485	4.95793	5.80411	5.64251	5.2088	5.86141	6.14435	5.93683	4.83308	6.50484	6.09809	5.92779	5.90453	0.283204	0.353362	0.134069	0.8852	0.608296	0.310089	0.440824	0.377739	0.904228	0.700419
2513020848	270001	280000	12.2238	10.5498	13.2395	11.3568	12.4529	11.3899	12.474	12.0788	17.6447	11.6418	10.2418	9.90448	9.60202	11.0616	10.8233	9.18589	9.40315	10.574	7.97647	11.3355	9.58426	11.2896	9.8009	11.8205	9.54511	10.3833	11.0581	0.175837	0.268815	0.113609	0.791279	0.459519	0.279191	0.440824	0.377739	0.872572	0.700419
2513020848	275001	285000	12.2238	10.5498	13.2395	11.3568	12.4529	11.3899	12.474	12.0788	17.6447	11.6418	10.2418	9.90448	9.60202	11.0616	10.6916	9.18589	9.25081	10.574	7.83349	11.3355	9.58426	11.143	9.8009	11.8205	9.54511	10.3833	11.0661	0.181911	0.286815	0.1319	0.803191	0.48435	0.279191	0.440824	0.377739	0.872572	0.700419
2513020848	280001	290000	6.14435	4.50951	5.86557	5.28998	6.16599	5.03428	6.29173	4.63579	8.09894	5.35415	3.40974	3.43113	3.18334	6.2183	4.98909	4.17118	3.59443	5.01522	2.78181	5.58825	3.44	5.5687	5.16291	5.41238	3.51309	4.63855	5.43333	0.151694	0.276784	0.213549	0.755885	0.47271	0.279191	0.440824	0.377739	0.872572	0.700419
2513020848	285001	295000	0	0	0	0.148058	0	0.143335	0	0	0	0	0	0	0	0	0	0	0	0	0	0	0	0	0	0.148473	0	0.131945	0.127525	0.23618	0.389213	0.30927	0.822909	0.615325	0.279191	0.440824	0.377739	0.872572	0.700419
2513020848	290001	300000	0.163283	0	0	0.139398	0	0.143335	0	0	0	0	0	0	0	0	0	0	0	0.147967	0.139319	0.276895	0	0.136798	0	0.148473	0	0.131945	0.127525	0.223168	0.381883	0.316854	0.81805	0.608467	0.279191	0.440824	0.377739	0.872572	0.700419
2513020848	295001	305000	0.163283	0	0	0	0.153843	0.149681	0	0	0	0	0	0	0	0	0	0	0	0.147967	0.139319	0.276895	0	0.137091	0	0	0	0	0	0.22239	0.379023	0.3108	0.805929	0.617659	0.279191	0.440824	0.377739	0.872572	0.700419
2513020848	300001	310000	0.316365	0.146619	0.141713	0	0.153843	0.149681	0	0	0	0	0	0	0	0.148149	0	0	0	0.296115	0.139319	0.420985	0	0.137091	0	0	0	0	0	0.204313	0.372607	0.31277	0.784947	0.601935	0.279191	0.440824	0.377739	0.872572	0.700419
2513020848	305001	315000	0.154163	0.146619	0.141713	0	0.153843	0.149681	0	0	0	0	0	0	0	0.148149	0	0	0	0.148103	0	0.141258	0	0	0	0	0	0	0	0.221035	0.382347	0.304798	0.798334	0.607764	0.279191	0.440824	0.377739	0.872572	0.700419
2513020848	310001	320000	0.154163	0.146619	0.141713	0	0	0	0	0	0	0	0	0	0	0.148149	0	0	0	0.148103	0	0.141258	0	0	0	0	0	0	0	0.224405	0.384803	0.310327	0.803216	0.613328	0.279191	0.440824	0.377739	0.872572	0.700419
2513020848	315001	325000	0	0	0	0	0	0	0	0	0.147258	0.149531	0	0.15397	0.153654	0	0	0	0	0.153906	0	0.146452	0	0.143404	0	0	0	0	0	0.23322	0.395208	0.311262	0.821258	0.63411	0.279191	0.440824	0.377739	0.872572	0.700419
2513020848	320001	330000	0	0	0	0	0	0	0	0	0.147258	0.294342	0	0.15397	0.153654	0	0.143031	0	0	0.305954	0	0.146452	0	0.143404	0	0	0	0	0	0.230167	0.392608	0.3118	0.81674	0.634667	0.279191	0.440824	0.377739	0.872572	0.700419
2513020848	325001	335000	0	0	0.150035	0	0	0	0.15578	0	0.147258	0.294342	0	0.15397	0.153654	0	0.143031	0	0	0.305954	0	0.146452	0	0.289303	0	0	0	0	0	0.230881	0.390281	0.310148	0.815729	0.633476	0.279191	0.440824	0.377739	0.872572	0.700419
2513020848	330001	340000	0	0	0.150035	0	0	0	0.15578	0	0	0.145065	0	0	0	0	0.143031	0	0.14866	0.152036	0	0	0	0.146004	0	0	0	0	0	0.234185	0.383444	0.312314	0.809034	0.622651	0.279191	0.440824	0.377739	0.872572	0.700419
2513020848	335001	345000	0	0	0.150035	0.159508	0	0	0.15578	0	0	0	0	0	0	0	0	0	0.14866	0	0	0	0	0.281923	0	0	0	0	0	0.238831	0.384462	0.310684	0.812828	0.618282	0.279191	0.440824	0.377739	0.872572	0.700419
2513020848	340001	350000	0	0	0	0.159508	0	0	0.150189	0	0	0	0	0	0	0.151034	0	0.143064	0.14866	0	0	0	0	0.280153	0.145843	0	0	0	0.130332	0.239616	0.38294	0.323992	0.816803	0.61836	0.279191	0.440824	0.377739	0.872572	0.700419
2513020848	345001	355000	0	0	0	0.159508	0	0	0.150189	0	0	0	0	0	0	0.151034	0	0.143064	0	0	0	0	0	0.280153	0.145843	0	0	0	0.130332	0.238009	0.384399	0.315438	0.818041	0.619774	0.279191	0.440824	0.377739	0.872572	0.700419
2513020848	350001	360000	0	0	0	0	0	0	0.150189	0	0	0	0	0	0	0.151034	0	0.143064	0	0	0	0	0	0.143646	0.145843	0	0	0	0.130332	0.237243	0.38583	0.315252	0.818397	0.622165	0.279191	0.440824	0.377739	0.872572	0.700419
2513020848	355001	365000	0	0	0	0	0	0	0	0	0	0	0	0	0	0	0	0	0	0	0	0	0	0	0	0	0	0	0	0.236051	0.388488	0.309227	0.816099	0.623295	0.279191	0.440824	0.377739	0.872572	0.700419
2513020848	360001	370000	0	0	0	0	0	0	0	0	0	0	0	0	0	0	0	0	0	0	0	0	0	0	0	0	0	0	0	0.236051	0.388488	0.309848	0.816029	0.623727	0.279191	0.440824	0.377739	0.872572	0.700419
2513020848	365001	375000	0	0	0	0	0	0	0	0	0	0	0	0	0	0	0	0	0	0	0	0	0	0	0	0	0	0	0	0.236051	0.388488	0.310061	0.816004	0.623876	0.279191	0.440824	0.377739	0.872572	0.700419
2513020848	370001	380000	0	0	0	0	0	0	0	0	0	0	0	0	0	0	0	0	0	0	0	0	0	0	0	0	0	0	0	0.236051	0.388488	0.313299	0.815531	0.62347	0.279191	0.440824	0.377739	0.872572	0.700419
2513020848	375001	385000	0	0	0	0	0	0	0	0	0	0	0	0	0	0	0	0	0	0	0	0	0	0	0	0	0	0	0	0.236051	0.388488	0.312038	0.815706	0.623088	0.279191	0.440824	0.377739	0.872572	0.700419
2513020848	380001	390000	0	0	0.155021	0	0	0	0	0	0	0	0	0	0	0	0	0	0	0	0	0	0	0	0	0	0	0	0	0.236051	0.388488	0.310176	0.813974	0.620199	0.279191	0.440824	0.377739	0.872572	0.700419
2513020848	385001	395000	0	0	0.155021	0	0	0	0	0	0	0	0	0	0	0	0	0	0	0	0	0	0	0	0	0	0	0	0	0.236051	0.388488	0.307146	0.814209	0.620123	0.279191	0.440824	0.377739	0.872572	0.700419
2513020848	390001	400000	0	0.151752	0.155021	0	0.146661	0	0	0	0	0	0	0	0	0	0	0	0	0	0.143891	0	0	0	0	0	0	0	0	0.237691	0.387319	0.301376	0.806674	0.610976	0.279191	0.440824	0.377739	0.872572	0.700419
2513020848	395001	405000	0	0.151752	0	0	0.146661	0	0	0	0	0	0	0	0	0	0	0	0.144801	0.141348	0.143891	0	0	0.134101	0	0	0	0	0	0.23436	0.384318	0.311045	0.807292	0.620643	0.279191	0.440824	0.377739	0.872572	0.700419
2513020848	400001	410000	0	0.151752	0	0	0.146661	0	0	0	0	0	0	0	0	0	0	0	0.144801	0.141348	0.143891	0	0	0.134101	0	0	0	0	0	0.234774	0.385347	0.310588	0.809492	0.621296	0.279191	0.440824	0.377739	0.872572	0.700419
2513020848	405001	415000	0	0.1555	0	0.152151	0	0	0	0	0	0	0	0	0	0	0	0	0.144801	0.141348	0	0	0	0.134101	0	0	0	0.13716	0	0.234886	0.386845	0.310629	0.813378	0.618913	0.279191	0.440824	0.377739	0.872572	0.700419
2513020848	410001	420000	0	0.1555	0	0.440997	0	0	0	0	0	0	0	0	0	0	0	0	0	0	0	0	0	0	0	0	0	0.13716	0	0.236038	0.38966	0.30378	0.813985	0.613516	0.279191	0.440824	0.377739	0.872572	0.700419
2513020848	415001	425000	0	0.1555	0	0.440997	0	0	0	0	0	0	0	0	0	0	0	0	0	0	0	0	0	0	0	0	0	0.13716	0	0.23604	0.38981	0.303112	0.813725	0.6123	0.279191	0.440824	0.377739	0.872572	0.700419
2513020848	420001	430000	0	0	0	0.290589	0	0	0	0	0	0	0	0	0	0	0	0	0	0	0	0	0	0	0	0	0	0	0	0.235154	0.389412	0.305268	0.814198	0.619669	0.279191	0.440824	0.377739	0.872572	0.700419
2513020848	425001	435000	0	0	0	0	0	0	0	0	0	0	0	0	0	0	0	0	0	0	0	0.14105	0	0.138598	0	0	0	0	0	0.235069	0.386259	0.312561	0.81589	0.623955	0.279191	0.440824	0.377739	0.872572	0.700419
2513020848	430001	440000	0	0	0	0.41344	0	0	0	0	0	0	0	0	0	0	0	0	0	0	0	0.14105	0	0.138598	0	0	0	0	0	0.232844	0.3872	0.305916	0.811906	0.616877	0.279191	0.440824	0.377739	0.872572	0.700419
2513020848	435001	445000	0	0	0	0.41344	0	0	0	0	0	0	0	0	0	0	0	0	0	0	0	0.14105	0	0.138598	0	0	0	0	0	0.233599	0.387497	0.306695	0.812911	0.618402	0.279191	0.440824	0.377739	0.872572	0.700419
2513020848	440001	450000	0	0	0	0.41344	0	0	0	0	0	0	0	0	0	0	0	0	0	0	0	0	0	0	0	0	0	0	0	0.234893	0.389692	0.304105	0.813636	0.618599	0.279191	0.440824	0.377739	0.872572	0.700419
2513020848	445001	455000	0	0	0	0.440487	0	0	0	0	0	0	0	0	0	0	0	0	0	0	0	0	0	0	0	0	0	0.139774	0	0.234982	0.389595	0.308175	0.815866	0.616999	0.279191	0.440824	0.377739	0.872572	0.700419
2513020848	450001	460000	0	0	0.172729	0.582423	0	0	0	0	0	0.15763	0.154163	0	0	0	0	0.141408	0.148149	0	0.13739	0.137909	0.145883	0.282336	0	0	0	0.139774	0	0.237719	0.386371	0.309701	0.808492	0.614316	0.279191	0.440824	0.377739	0.872572	0.700419
2513020848	455001	465000	0.152737	0	0.172729	0.582423	0	0	0	0	0	0.15763	0.154163	0	0.149631	0	0	0.141408	0.148149	0.145179	0.27478	0.138447	0.287083	0.413728	0	0	0	0.139774	0	0.235775	0.386043	0.311276	0.807146	0.618333	0.279191	0.440824	0.377739	0.872572	0.700419
2513020848	460001	470000	0.152737	0	0.172729	0.140815	0.152977	0	0	0	0	0.15763	0.154163	0	0.149631	0	0	0.141408	0.148149	0.145179	0.27478	0.138447	0.287083	0.413728	0	0	0	0	0	0.236592	0.384582	0.310537	0.806709	0.624887	0.279191	0.440824	0.377739	0.872572	0.700419
2513020848	465001	475000	0.152737	0	0	0	0.152977	0	0	0	0	0	0	0	0.149631	0.143507	0	0.138598	0.145527	0.145179	0.271698	0.135975	0.141469	0.271532	0	0	0	0	0	0.2311	0.386945	0.319897	0.807057	0.631378	0.279191	0.440824	0.377739	0.872572	0.700419
2513020848	470001	480000	0	0	0	0	0.152977	0	0	0	0	0	0	0	0	0.143507	0	0.138598	0.145527	0	0.134456	0.135975	0	0.134008	0	0	0	0	0	0.232417	0.38699	0.320171	0.806373	0.627807	0.279191	0.440824	0.377739	0.872572	0.700419
2513020848	475001	485000	0	0	0	0	0	0	0	0	0	0	0	0	0	0.143507	0	0.138598	0.145527	0	0.134456	0.135975	0	0.134008	0	0	0	0	0	0.232865	0.386897	0.323555	0.806472	0.629622	0.279191	0.440824	0.377739	0.872572	0.700419
2513020848	480001	490000	0	0	0	0	0	0	0	0	0	0	0	0	0	0.146829	0.142831	0	0	0	0	0	0.144876	0.137813	0.140216	0	0	0	0.130054	0.237434	0.379389	0.32285	0.818846	0.623247	0.279191	0.440824	0.377739	0.872572	0.700419
2513020848	485001	495000	0	0	0	0	0	0	0	0	0	0	0	0	0	0.146829	0.142831	0	0	0	0	0	0.144876	0.276157	0.140216	0	0	0	0.130054	0.239078	0.376898	0.325408	0.819381	0.622972	0.279191	0.440824	0.377739	0.872572	0.700419
2513020848	490001	500000	0	0	0	0	0	0	0	0	0.143998	0	0	0	0	0.146829	0.142831	0	0	0	0	0	0.144876	0.276157	0.140216	0	0	0	0.130054	0.238395	0.378896	0.320277	0.820047	0.625129	0.279191	0.440824	0.377739	0.872572	0.700419
2513020848	495001	505000	0	0	0	0	0	0	0	0	0.143998	0	0	0	0	0	0	0	0	0	0	0	0	0.138348	0	0	0	0	0	0.237358	0.386067	0.309334	0.817988	0.625271	0.279191	0.440824	0.377739	0.872572	0.700419
2513020848	500001	510000	0	0	0	0	0	0	0	0	0.143998	0	0	0	0	0	0	0	0	0	0	0	0	0	0	0	0	0	0	0.236053	0.387992	0.306723	0.817571	0.626092	0.279191	0.440824	0.377739	0.872572	0.700419
2513020848	505001	515000	0	0	0	0	0	0	0	0	0	0	0	0	0	0	0	0	0	0	0	0	0	0	0	0	0	0	0	0.236051	0.388488	0.307631	0.816362	0.624553	0.279191	0.440824	0.377739	0.872572	0.700419
2513020848	510001	520000	0	0	0	0	0	0	0	0	0	0	0	0	0	0	0	0	0	0	0	0	0	0	0	0	0	0	0	0.236051	0.388488	0.307533	0.816378	0.624631	0.279191	0.440824	0.377739	0.872572	0.700419
2513020848	515001	525000	0	0	0	0	0	0	0	0	0	0	0	0	0	0	0.145027	0	0.151306	0	0.277601	0	0	0.139911	0	0	0	0	0.130488	0.244194	0.373389	0.333713	0.815801	0.624986	0.279191	0.440824	0.377739	0.872572	0.700419
2513020848	520001	530000	0	0	0	0	0	0	0	0	0	0	0	0	0	0	0.145027	0	0.141775	0	0.41725	0	0	0.132947	0	0	0	0	0.130488	0.25148	0.360292	0.359581	0.81192	0.630206	0.280261	0.440824	0.392992	0.872572	0.700419
2513020848	525001	535000	0	0	0	0	0	0	0	0	0	0	0	0	0	0	0.145027	0	0.141775	0	0.416401	0	0	0.132947	0	0	0	0	0.12993	0.293663	0.309118	0.490405	0.806236	0.652078	0.320654	0.440824	0.512402	0.872572	0.700543
2513020848	530001	540000	0.576134	0.277703	0.535159	0.412169	0.81497	0.537901	0.832496	0.412379	0	0.273776	0	0.425886	0.282938	0.277095	0.137251	0.962708	1.55483	0.702777	0.925519	0.933412	0.55379	0.924171	0.407173	1.30456	0.290899	0.769001	0.747045	0.23541	0.451393	0.953682	0.694909	0.528046	0.279191	0.481	0.956904	0.872572	0.700419
2513020848	535001	545000	0.576134	0.277703	0.677696	0.412169	0.81497	0.537901	0.832496	0.412379	0	0.273776	0.145488	0.425886	0.282938	0.277095	0.137251	0.962708	1.55285	0.70364	0.925519	0.930273	0.55379	0.922622	0.407173	1.30456	0.290899	0.769001	0.747045	0.225121	0.397502	0.477647	0.797629	0.570333	0.279191	0.440824	0.499951	0.872572	0.700419
2513020848	540001	550000	0.576134	0.277703	0.677696	0.411069	0.81497	0.537901	0.832496	0.412379	0	0.273776	0.145488	0.425886	0.282938	0.277095	0.137251	0.962708	3.28058	0.70364	0.925519	0.930273	0.55429	0.922622	0.407173	1.30456	0.290899	0.769001	0.747045	0.246329	0.394304	0.471426	0.765665	0.622953	0.279191	0.440824	0.493875	0.872572	0.700419
2513020848	545001	555000	0	0	0.146787	0	0.146411	0	0	0	0	0	0.149481	0	0	0	0	0	1.71677	0	0.138078	0	0	0	0	0	0	0	0	0.256166	0.382879	0.353393	0.756895	0.659616	0.283094	0.440824	0.387655	0.872572	0.705275
2513020848	550001	560000	0	0	0	0	0.146411	0	0	0	0	0	0	0	0	0	0	0	1.71677	0	0.141806	0	0	0	0	0	0	0	0	0.312087	0.383999	0.456792	0.669932	0.754634	0.337361	0.440824	0.479813	0.872572	0.788789
2513020848	555001	565000	0	0	0	0	0.146411	0	0	0	0	0	0	0	0	0	0	0	0	0	0.141806	0	0	0	0	0	0	0	0	0.235022	0.386051	0.307159	0.810838	0.621858	0.279191	0.440824	0.377739	0.872572	0.700419
2513020848	560001	570000	0.166914	0.168326	0.166791	0.155921	0.163597	0	0	0.162171	0.156571	0	0.158751	0.156868	0.155089	0.152093	0.151528	0.149383	0.156571	0.153843	0.286399	0.139478	0.151417	0.144763	0	0	0.160932	0.138447	0.132511	0.23366	0.388946	0.312324	0.811139	0.626648	0.279191	0.440824	0.377739	0.872572	0.700419
2513020848	565001	575000	0.166914	0.168326	0.166791	0.421752	0.163597	0	0	0.162171	0.156571	0	0.158751	0.156868	0.155089	0.152093	0.151528	0.149383	0.156571	0.153843	0.144763	0.139478	0.151417	0.144763	0	0	0.160932	0.138447	0.132511	0.233332	0.390277	0.306583	0.811746	0.621751	0.279191	0.440824	0.377739	0.872572	0.700419
2513020848	570001	580000	0.166914	0.168326	0.166791	0.426644	0.163597	0	0	0.162171	0.156571	0	0.158751	0.156868	0.155089	0.152093	0.302944	0.300792	0.156571	0.153843	0.287925	0.143821	0.151417	0.144763	0	0	0.160932	0.138447	0.132511	0.23396	0.390596	0.311009	0.804318	0.626736	0.279191	0.440824	0.377739	0.872572	0.700419
2513020848	575001	585000	0.806998	0.662369	0.6299	1.14968	0.627471	0.603703	0.632091	0.792934	0.743301	0.754093	0.786607	0.789323	0.783967	0.78032	0.923058	0.903637	0.798404	0.777849	0.873871	0.734995	0.77343	0.729216	0.904912	0.641186	0.802832	0.567973	0.545784	0.234507	0.392976	0.314754	0.793818	0.642678	0.279191	0.440824	0.377739	0.872572	0.700419
2513020848	580001	590000	0.806998	0.662369	0.6299	0.823965	0.627471	0.603703	0.632091	0.792934	0.743301	0.754093	0.786607	0.789323	0.783967	0.78032	0.923058	0.903637	0.798404	0.777849	0.873871	0.734995	0.77343	0.729216	0.904912	0.641186	0.802832	0.567973	0.545784	0.235664	0.391736	0.31997	0.796459	0.64725	0.279191	0.440824	0.377739	0.872572	0.700419
2513020848	585001	595000	0.806998	0.662369	0.6299	0.82623	0.627471	0.603703	0.632091	0.792934	0.743301	0.754093	0.786607	0.789323	0.783967	0.78032	0.769215	0.751981	0.798404	0.777849	0.728226	0.734995	0.77343	0.729216	0.904912	0.641186	0.802832	0.567973	0.545784	0.234922	0.39081	0.313167	0.807173	0.636519	0.279191	0.440824	0.377739	0.872572	0.700419
2513020848	590001	600000	0.31449	0.471053	0.292412	0.310724	0.306686	0.4367	0.315729	0.29751	0.286331	0.43741	0.446264	0.299261	0.44655	0.294428	0.43765	0.288282	0.453755	0.291687	0.416631	0.278063	0.445278	0.412871	0.289378	0.309772	0.309907	0.270471	0.38846	0.243538	0.38628	0.3127	0.814796	0.625018	0.279191	0.440824	0.377739	0.872572	0.700419
2513020848	595001	605000	0.31449	0.471053	0.292412	0.310724	0.460029	0.4367	0.473594	0.29751	0.286331	0.43741	0.446264	0.448892	0.44655	0.441643	0.43765	0.288282	0.605006	0.291687	0.416631	0.417095	0.445278	0.556856	0.289378	0.309772	0.309907	0.270471	0.518961	0.241675	0.386414	0.317639	0.817853	0.627296	0.279191	0.440824	0.377739	0.872572	0.700419
2513020848	600001	610000	0.31449	0.471053	0.292412	0.310724	0.460029	0.4367	0.473594	0.29751	0.286331	0.43741	0.446264	0.448892	0.44655	0.441643	0.43765	0.288282	0.605006	0.291687	0.416631	0.417095	0.445278	0.556856	0.289378	0.309772	0.309907	0.270471	0.518961	0.241841	0.386355	0.317888	0.817903	0.627407	0.279191	0.440824	0.377739	0.872572	0.700419
2513020848	605001	615000	0	0	0	0	0.144763	0	0.145372	0	0	0	0	0.148473	0	0.146329	0	0	0.147697	0	0	0.141168	0	0.13753	0	0	0	0	0.131508	0.233148	0.389106	0.31297	0.819006	0.624966	0.279191	0.440824	0.377739	0.872572	0.700419
2513020848	610001	620000	0	0	0	0	0	0	0	0	0	0	0	0	0	0	0	0	0	0	0	0	0	0	0	0	0	0	0	0.236051	0.388488	0.309227	0.816099	0.623295	0.279191	0.440824	0.377739	0.872572	0.700419
2513020848	615001	625000	0.301002	0.299967	0	0	0.296759	0.285268	0.298864	0	0	0	0	0	0	0	0	0	0	0	0	0	0	0	0	0.305713	0	0.265321	0.256477	0.235324	0.385175	0.298312	0.82148	0.594063	0.279191	0.440824	0.377739	0.872572	0.700419
2513020848	620001	630000	0.453427	0.299967	0.150448	0.150292	0.296759	0.428992	0.298864	0	0	0	0	0.149731	0	0.150137	0	0	0	0	0.139214	0.139802	0.150086	0	0.143998	0.45628	0	0.265321	0.256477	0.229117	0.387626	0.29524	0.814484	0.583447	0.279191	0.440824	0.377739	0.872572	0.700419
2513020848	625001	635000	0.453427	0.299967	0.150448	0.300377	0.296759	0.428992	0.298864	0	0	0	0	0.149731	0	0.150137	0	0	0	0	0.139214	0.139802	0.150086	0	0.143998	0.45628	0	0.265321	0.256477	0.227934	0.388138	0.291532	0.813135	0.577429	0.279191	0.440824	0.377739	0.872572	0.700419
2513020848	630001	640000	0.313438	0	0.150448	0.297987	0	0.144213	0	0	0	0	0	0.149731	0	0.150137	0	0	0	0	0.141288	0.139802	0.150086	0	0.146125	0.151922	0	0	0	0.229038	0.390699	0.305213	0.80618	0.6148	0.279191	0.440824	0.377739	0.872572	0.700419
2513020848	635001	645000	0.159508	0	0	0.13671	0	0	0	0	0	0	0	0	0	0	0	0	0	0	0	0.137091	0	0.13587	0	0	0	0	0	0.233222	0.386567	0.308076	0.812994	0.618487	0.279191	0.440824	0.377739	0.872572	0.700419
2513020848	640001	650000	0.159508	0	0	0	0	0	0	0	0	0	0	0	0	0	0	0	0	0	0	0.137091	0	0.13587	0	0	0	0	0	0.233668	0.386351	0.309491	0.813801	0.619962	0.279191	0.440824	0.377739	0.872572	0.700419
2513020848	645001	655000	0	0	0	0.13671	0	0	0	0	0	0	0	0	0	0	0	0	0	0	0	0.137091	0	0.13587	0	0	0	0	0	0.234773	0.386865	0.310556	0.815957	0.621901	0.279191	0.440824	0.377739	0.872572	0.700419
2513020848	650001	660000	0	0	0	0.42598	0	0	0	0	0	0	0	0	0	0	0	0	0	0	0	0.140049	0	0	0	0	0	0	0	0.232766	0.38913	0.308029	0.815311	0.618315	0.279191	0.440824	0.377739	0.872572	0.700419
2513020848	655001	665000	0	0	0	0.42598	0	0	0	0	0.146914	0	0	0	0	0	0	0	0	0	0	0.140049	0	0	0	0	0	0	0	0.232731	0.388648	0.306741	0.816522	0.620111	0.279191	0.440824	0.377739	0.872572	0.700419
2513020848	660001	670000	0	0	0	0.284685	0	0	0	0	0.146914	0	0	0	0	0	0	0	0	0	0	0.140049	0	0	0	0	0	0	0	0.232764	0.388155	0.307869	0.816633	0.621701	0.279191	0.440824	0.377739	0.872572	0.700419
2513020848	665001	675000	0	0	0	0	0	0	0	0	0.146914	0	0	0	0	0	0	0	0	0	0	0	0	0	0	0	0	0	0	0.236053	0.387911	0.30771	0.817574	0.625452	0.279191	0.440824	0.377739	0.872572	0.700419
2513020848	670001	680000	0	0	0	0	0	0	0	0	0	0	0	0	0	0	0	0	0	0	0	0	0	0	0	0	0	0	0	0.236051	0.388488	0.309227	0.816099	0.623295	0.279191	0.440824	0.377739	0.872572	0.700419
2513020848	675001	685000	0	0	0	0	0	0	0	0	0	0	0	0	0	0	0	0	0	0	0	0	0	0	0	0	0	0	0	0.236051	0.388488	0.309227	0.816099	0.623295	0.279191	0.440824	0.377739	0.872572	0.700419
2513020848	680001	690000	0	0	0	0	0	0	0	0	0	0	0	0	0	0	0	0	0.147388	0.144951	0	0.136798	0.146206	0.135236	0	0.152917	0	0	0	0.231551	0.386193	0.319169	0.811887	0.626956	0.279191	0.440824	0.377739	0.872572	0.700419
2513020848	685001	695000	0	0	0	0	0	0	0	0	0	0	0	0	0	0	0.142634	0.140356	0.147388	0.144951	0.137766	0.275675	0.146206	0.136687	0	0.152917	0	0	0	0.231003	0.385711	0.327464	0.807422	0.629937	0.279191	0.440824	0.377739	0.872572	0.700419
2513020848	690001	700000	0	0	0	0	0	0	0	0	0	0	0	0	0	0	0.142634	0.140356	0.147388	0.144951	0.137766	0.275675	0.146206	0.136687	0	0.152917	0	0	0	0.231962	0.38624	0.323907	0.809116	0.62867	0.279191	0.440824	0.377739	0.872572	0.700419
2513020848	695001	705000	0	0	0	0	0	0	0	0	0	0	0	0	0	0	0.142634	0.140356	0	0	0.137766	0.137483	0	0	0	0	0	0	0	0.234947	0.387749	0.318675	0.811152	0.626811	0.279191	0.440824	0.377739	0.872572	0.700419
2513020848	700001	710000	0.151252	0.146535	0.144689	0	0.14541	0	0	0	0.13649	0.145606	0	0	0.151417	0	0	0	0.149481	0.149139	0.279603	0.14067	0	0	0	0	0	0	0.133826	0.231957	0.3883	0.303107	0.812885	0.617741	0.279191	0.440824	0.377739	0.872572	0.700419
2513020848	705001	715000	0.147922	0.146535	0.144689	0	0.14541	0	0	0	0.13649	0.145606	0	0.15397	0.151417	0	0	0	0.149481	0.149139	0.421239	0.14067	0	0	0	0	0	0	0.133826	0.231011	0.39695	0.300065	0.812794	0.622086	0.279191	0.440824	0.377739	0.872572	0.700419
2513020848	710001	720000	0.147922	0.146535	0.139829	0	0.14541	0	0	0	0.13649	0.145606	0	0.15397	0.151417	0	0	0	0.149481	0.149139	0.421239	0.14067	0	0	0	0	0	0	0.129394	0.232499	0.394341	0.302871	0.813656	0.622744	0.279191	0.440824	0.377739	0.872572	0.700419
2513020848	715001	725000	0	0	0	0	0	0	0	0	0	0	0	0.15397	0	0	0	0	0	0	0.143681	0	0	0	0	0	0	0	0	0.23632	0.393015	0.308801	0.816626	0.626661	0.279191	0.440824	0.377739	0.872572	0.700419
2513020848	720001	730000	0.156498	0	0	0	0	0.137114	0	0	0	0.144652	0	0	0.151252	0.147171	0	0.142601	0.151808	0.144726	0.277397	0.140903	0.152093	0.280488	0	0	0	0	0	0.233237	0.386835	0.317994	0.808227	0.631149	0.279191	0.440824	0.377739	0.872572	0.700419
2513020848	725001	735000	0.156498	0	0	0	0	0.137436	0	0	0	0.144652	0	0	0.151252	0.147171	0	0.142601	0.151808	0.144726	0.277397	0.140903	0.152093	0.280488	0	0	0	0	0	0.233029	0.386714	0.318658	0.807635	0.631736	0.279191	0.440824	0.377739	0.872572	0.700419
2513020848	730001	740000	0.305	0	0	0	0.148519	0.279386	0.146661	0	0	0.292331	0	0	0.151252	0.147171	0	0.142601	0.151808	0.144726	0.417878	0.283427	0.152093	0.280488	0	0	0	0	0	0.229732	0.382809	0.316427	0.802068	0.626794	0.279191	0.440824	0.377739	0.872572	0.700419
2513020848	735001	745000	0.149236	0	0	0	0.13399	0.142375	0.146661	0	0	0.147832	0	0	0	0	0	0	0	0	0.140903	0.142569	0	0	0	0	0	0.265022	0	0.233617	0.385431	0.308788	0.816923	0.615266	0.279191	0.440824	0.377739	0.872572	0.700419
2513020848	740001	750000	0.149236	0	0	0	0.13399	0.142375	0.146661	0	0	0.147832	0	0	0	0	0	0	0	0	0.140903	0.142569	0	0	0	0	0	0.265022	0	0.233934	0.385831	0.308843	0.816813	0.61632	0.279191	0.440824	0.377739	0.872572	0.700419
2513020848	745001	755000	0	0.142119	0	0	0	0.141079	0	0	0	0.144213	0	0	0	0.145843	0	0.140903	0	0	0.1382	0.142601	0.14752	0	0.142864	0	0	0.265022	0	0.236588	0.38701	0.316855	0.814571	0.619337	0.279191	0.440824	0.377739	0.872572	0.700419
2513020848	750001	760000	0	0.142119	0	0	0	0.141079	0	0	0	0.144213	0	0	0	0.145843	0	0.140903	0	0	0.1382	0.142601	0.14752	0	0.142864	0	0	0	0	0.236822	0.38639	0.317286	0.807602	0.622168	0.279191	0.440824	0.377739	0.872572	0.700419
2513020848	755001	765000	0	0.142119	0	0	0	0.141079	0	0	0	0.144213	0	0	0	0.145843	0	0.140903	0	0	0.1382	0.142601	0.14752	0	0.142864	0	0	0	0	0.237177	0.385484	0.320898	0.803815	0.621629	0.279191	0.440824	0.377739	0.872572	0.700419
2513020848	760001	770000	0	0	0	0	0	0	0	0	0	0	0	0	0	0	0	0	0	0	0	0	0	0	0	0	0	0	0	0.236051	0.388488	0.309227	0.816099	0.623295	0.279191	0.440824	0.377739	0.872572	0.700419
2513020848	765001	775000	0	0	0	0	0	0	0	0	0	0	0	0	0	0	0	0	0	0	0	0	0	0	0	0	0	0	0	0.236051	0.388488	0.309227	0.816099	0.623295	0.279191	0.440824	0.377739	0.872572	0.700419
2513020848	770001	780000	0	0	0	0	0	0	0	0	0	0	0	0	0	0	0	0	0	0	0	0	0	0	0	0	0	0	0	0.236051	0.388488	0.309227	0.816099	0.623295	0.279191	0.440824	0.377739	0.872572	0.700419
2513020848	775001	785000	0	0	0	0	0	0	0	0	0	0	0	0	0	0	0	0	0	0	0	0	0	0	0	0	0	0	0	0.236051	0.388488	0.309227	0.816099	0.623295	0.279191	0.440824	0.377739	0.872572	0.700419
2513020848	780001	790000	0	0	0	0	0	0	0	0	0	0	0	0	0	0	0	0	0	0	0	0	0	0	0	0	0	0	0.125555	0.237344	0.387377	0.310977	0.824005	0.61737	0.279191	0.440824	0.377739	0.872572	0.700419
2513020848	785001	795000	0	0	0	0	0	0	0	0	0	0	0	0	0	0	0	0	0	0	0	0	0	0	0	0	0	0	0.125555	0.237024	0.387649	0.310545	0.822071	0.618828	0.279191	0.440824	0.377739	0.872572	0.700419
2513020848	790001	800000	0	0	0	0	0	0	0	0	0	0	0	0	0	0	0	0	0	0.145141	0	0	0	0	0	0	0	0	0.125555	0.233293	0.386911	0.311553	0.819801	0.620611	0.279191	0.440824	0.377739	0.872572	0.700419
2513020848	795001	805000	0.155089	0	0	0	0.148473	0	0	0.151922	0	0.146871	0	0	0	0	0	0.145803	0	0.145141	0	0.141713	0	0	0.147967	0	0	0	0	0.23128	0.383832	0.310756	0.809364	0.619488	0.279191	0.440824	0.377739	0.872572	0.700419
2513020848	800001	810000	0.155089	0	0	0	0.148473	0	0	0.151922	0	0.146871	0	0	0	0	0	0.145803	0	0.145141	0	0.141713	0	0	0.147967	0	0	0	0	0.231371	0.38392	0.310726	0.809494	0.619561	0.279191	0.440824	0.377739	0.872572	0.700419
2513020848	805001	815000	0.155089	0	0	0	0.148473	0	0	0.151922	0	0.146871	0	0	0	0	0	0.145803	0	0	0	0.141713	0	0	0.147967	0	0	0	0	0.235542	0.384409	0.30924	0.810081	0.617599	0.279191	0.440824	0.377739	0.872572	0.700419
2513020848	810001	820000	0	0	0	0	0	0	0	0	0	0	0	0	0	0	0	0	0	0	0.138826	0	0	0.140699	0	0	0	0	0	0.237603	0.385873	0.313212	0.815374	0.624446	0.279191	0.440824	0.377739	0.872572	0.700419
2513020848	815001	825000	0	0	0	0	0	0	0	0	0	0.145449	0	0	0	0	0	0	0	0	0.13649	0	0	0.140699	0	0	0	0	0	0.238124	0.386432	0.310865	0.814304	0.623224	0.279191	0.440824	0.377739	0.872572	0.700419
2513020848	820001	830000	0	0	0.152559	0	0	0	0	0	0	0.145449	0	0	0	0	0	0	0	0	0.13649	0	0	0.140699	0	0	0	0	0.129876	0.238846	0.385844	0.309701	0.818652	0.615127	0.279191	0.440824	0.377739	0.872572	0.700419
2513020848	825001	835000	0	0	0.152559	0.151583	0	0	0	0	0	0.145449	0	0	0	0	0	0	0	0	0.139346	0	0	0	0	0	0	0	0.129876	0.237247	0.387946	0.305194	0.817339	0.612241	0.279191	0.440824	0.377739	0.872572	0.700419
2513020848	830001	840000	0	0	0.152559	0.151583	0	0	0	0	0	0	0	0	0	0	0	0.140216	0	0	0.280098	0	0	0.135704	0.142183	0	0	0	0.129876	0.240323	0.386908	0.313025	0.816095	0.6165	0.279191	0.440824	0.377739	0.872572	0.700419
2513020848	835001	845000	0	0	0	0.151583	0.15098	0	0	0	0	0	0	0	0	0	0	0.140216	0	0	0.280098	0	0	0.135704	0.142183	0	0	0	0	0.239515	0.387529	0.31248	0.810778	0.622586	0.279191	0.440824	0.377739	0.872572	0.700419
2513020848	840001	850000	0	0	0	0	0.15098	0	0	0	0	0	0	0	0	0	0	0.140216	0	0	0.135519	0	0	0.135704	0.142183	0	0	0	0	0.239202	0.387878	0.312615	0.813606	0.623811	0.279191	0.440824	0.377739	0.872572	0.700419
2513020848	845001	855000	0	0	0	0	0.15098	0	0	0	0	0	0	0	0	0	0	0	0	0	0	0	0	0	0	0	0	0	0	0.23541	0.388488	0.306747	0.815462	0.621813	0.279191	0.440824	0.377739	0.872572	0.700419
2513020848	850001	860000	0	0	0	0	0	0	0	0	0	0	0	0	0	0	0	0	0	0	0	0	0	0	0	0	0	0	0	0.236051	0.388488	0.309227	0.816099	0.623295	0.279191	0.440824	0.377739	0.872572	0.700419
2513020848	855001	865000	0	0	0.142634	0.141109	0.141652	0	0	0	0	0	0	0	0	0	0	0	0	0	0.136446	0	0.142864	0.135891	0	0	0	0	0	0.237909	0.385771	0.308526	0.812772	0.617974	0.279191	0.440824	0.377739	0.872572	0.700419
2513020848	860001	870000	0.154098	0	0.142634	0.142407	0.141652	0	0	0	0	0.145333	0	0	0	0	0	0	0	0	0.136446	0.14153	0.142864	0.277045	0	0	0	0	0	0.23496	0.38377	0.307807	0.809436	0.613851	0.279191	0.440824	0.377739	0.872572	0.700419
2513020848	865001	875000	0.154098	0	0.142634	0.142407	0.141652	0	0	0	0	0.145333	0	0	0	0	0	0.140961	0	0	0.136446	0.14153	0.142864	0.277045	0	0	0	0	0	0.235945	0.385969	0.309109	0.807419	0.615502	0.279191	0.440824	0.377739	0.872572	0.700419
2513020848	870001	880000	0.585151	0	0	0	0	0	0	0	0	0.145333	0	0	0	0	0	0.140961	0	0	0	0.14153	0	0.140815	0	0	0	0	0	0.228387	0.386367	0.303867	0.802271	0.607634	0.279191	0.440824	0.377739	0.872572	0.700419
2513020848	875001	885000	0.437054	0	0	0	0	0	0	0	0	0	0	0	0	0	0	0.140961	0	0	0	0	0	0	0	0	0	0	0	0.229903	0.388751	0.303581	0.803868	0.609933	0.279191	0.440824	0.377739	0.872572	0.700419
2513020848	880001	890000	0.437054	0	0	0.419405	0	0	0	0	0	0	0	0	0	0	0	0	0	0	0.138522	0	0	0	0	0	0	0	0	0.22844	0.387024	0.298391	0.803754	0.605082	0.279191	0.440824	0.377739	0.872572	0.700419
2513020848	885001	895000	0	0	0.151306	0.419405	0	0	0	0	0	0	0	0	0	0	0	0	0	0	0.138522	0	0	0	0	0	0	0	0	0.234894	0.389225	0.302298	0.810097	0.615008	0.279191	0.440824	0.377739	0.872572	0.700419
2513020848	890001	900000	0	0	0.151306	0.419405	0	0.148994	0	0	0	0	0	0	0	0.145103	0	0	0	0	0.274001	0	0	0	0	0	0	0	0.1271	0.233328	0.386093	0.304879	0.812317	0.614176	0.279191	0.440824	0.377739	0.872572	0.700419
2513020848	895001	905000	0	0	0.151306	0.151362	0	0.148994	0	0	0	0	0	0	0	0.145103	0.147967	0	0	0	0.276205	0.144105	0	0.140132	0	0	0	0	0.128433	0.231805	0.379123	0.322484	0.810946	0.615208	0.279191	0.440824	0.377739	0.872572	0.700419
2513020848	900001	910000	0	0	0	0.151362	0	0.148994	0	0	0	0	0	0	0	0.145103	0.147967	0	0	0	0.276205	0.144105	0	0.140132	0	0	0	0	0.128433	0.232438	0.380526	0.322822	0.813831	0.619974	0.279191	0.440824	0.377739	0.872572	0.700419
2513020848	905001	915000	0	0	0	0.28821	0	0	0	0.140641	0	0	0	0.145217	0.144358	0	0.291687	0	0	0.144763	0.276895	0.280153	0	0.276597	0	0	0	0	0	0.231763	0.385281	0.320776	0.812031	0.636482	0.279191	0.440824	0.377739	0.872572	0.700419
2513020848	910001	920000	0	0	0	0.143199	0	0	0	0.140641	0	0	0	0.145217	0.144358	0	0.143962	0	0	0.144763	0.13623	0.136866	0	0.136273	0	0	0	0	0	0.233851	0.389626	0.309363	0.816147	0.635652	0.279191	0.440824	0.377739	0.872572	0.700419
2513020848	915001	925000	0	0	0	0.143199	0	0	0.149334	0.283987	0	0	0	0.145217	0.144358	0.147128	0.290899	0.143821	0	0.144763	0.275342	0.273776	0	0.276108	0	0	0	0	0	0.231593	0.380714	0.315215	0.807239	0.648148	0.279191	0.440824	0.377739	0.872572	0.700419
2513020848	920001	930000	0	0	0	0	0	0	0.149334	0.143473	0	0	0	0	0	0.147128	0.147128	0.143821	0	0	0.139293	0.136888	0	0.140049	0	0	0	0	0	0.234511	0.38053	0.314252	0.808348	0.631575	0.279191	0.440824	0.377739	0.872572	0.700419
2513020848	925001	935000	0	0	0	0	0	0	0.149334	0.143473	0	0	0	0	0	0.147128	0.147128	0.143821	0	0	0.139293	0.136888	0	0.140049	0	0	0	0	0	0.234284	0.379349	0.315687	0.807135	0.633266	0.279191	0.440824	0.377739	0.872572	0.700419
2513020848	930001	940000	0	0	0	0	0	0	0	0	0	0	0	0	0	0	0	0	0	0	0	0	0	0	0	0	0	0	0	0.236051	0.388488	0.309824	0.816032	0.62371	0.279191	0.440824	0.377739	0.872572	0.700419
2513020848	935001	945000	0	0	0	0	0	0	0	0	0	0	0	0	0	0	0	0	0	0	0	0	0	0	0	0	0	0	0	0.236051	0.388488	0.309996	0.816011	0.623831	0.279191	0.440824	0.377739	0.872572	0.700419
2513020848	940001	950000	0	0	0	0	0.143404	0	0	0	0	0	0	0	0	0	0	0	0	0	0	0	0	0	0	0	0	0	0	0.23538	0.388488	0.311598	0.817288	0.619672	0.279191	0.440824	0.377739	0.872572	0.700419
2513020848	945001	955000	0	0	0	0	0.143404	0	0	0	0	0	0	0	0	0	0	0	0	0	0	0	0	0	0	0	0	0	0	0.235502	0.388488	0.311159	0.817087	0.620343	0.279191	0.440824	0.377739	0.872572	0.700419
2513020848	950001	960000	0	0	0	0	0.143404	0	0	0	0	0	0	0	0	0	0	0	0	0	0	0	0	0	0	0	0	0	0	0.235582	0.388488	0.310873	0.816951	0.620779	0.279191	0.440824	0.377739	0.872572	0.700419
2513020848	955001	965000	0	0	0	0	0	0	0	0	0	0	0	0	0	0	0	0	0	0	0	0	0	0	0	0	0	0	0	0.236051	0.388488	0.309227	0.816099	0.623295	0.279191	0.440824	0.377739	0.872572	0.700419
2513020848	960001	970000	0	0	0	0	0	0	0	0	0	0	0	0	0	0	0	0.139693	0	0	0.13606	0	0	0	0	0	0	0	0	0.237456	0.390374	0.312282	0.812691	0.626016	0.279191	0.440824	0.377739	0.872572	0.700419
2513020848	965001	975000	0	0	0	0	0	0	0.146411	0	0	0.139532	0.145488	0	0	0	0.144213	0.139693	0.148802	0	0.270753	0.137553	0.146494	0.135156	0	0	0	0	0	0.239239	0.381179	0.315562	0.805658	0.63187	0.279191	0.440824	0.377739	0.872572	0.700419
2513020848	970001	980000	0.146329	0	0.139346	0	0	0	0.146411	0	0	0.139532	0.145488	0	0	0	0.144213	0.139693	0.148802	0.145963	0.270753	0.274641	0.146494	0.135156	0	0	0	0	0	0.228964	0.377476	0.314426	0.796349	0.624987	0.279191	0.440824	0.377739	0.872572	0.700419
2513020848	975001	985000	0.146329	0	0.139346	0	0	0	0.146411	0	0	0.139532	0.145488	0	0	0	0.144213	0	0.148802	0.145963	0.134724	0.274641	0.146494	0.13671	0	0	0	0	0	0.229497	0.378515	0.310515	0.804232	0.622231	0.279191	0.440824	0.377739	0.872572	0.700419
2513020848	980001	990000	0.146329	0	0.289676	0	0	0.150396	0	0	0	0	0	0	0	0	0	0	0	0.145963	0	0.137091	0	0	0	0	0	0	0	0.228626	0.385175	0.304497	0.807756	0.614215	0.279191	0.440824	0.377739	0.872572	0.700419
2513020848	985001	995000	0	0.146745	0.153159	0	0.290743	0.150396	0	0	0	0.287431	0	0	0	0	0	0	0	0	0	0	0	0	0	0	0	0	0	0.23778	0.388523	0.29823	0.809066	0.609447	0.279191	0.440824	0.377739	0.872572	0.700419
2513020848	990001	1000000	0	0.146745	0.153159	0	0.290743	0.150396	0	0	0	0.287431	0	0	0	0	0	0	0	0	0	0	0	0	0	0	0	0	0	0.238172	0.388536	0.295778	0.807493	0.606418	0.279191	0.440824	0.377739	0.872572	0.700419
2513020848	995001	1005000	0	0.146745	0	0	0.290743	0	0	0	0	0.432423	0	0	0	0	0	0	0	0	0	0	0	0	0	0	0	0	0	0.237999	0.390563	0.297207	0.808687	0.608687	0.279191	0.440824	0.377739	0.872572	0.700419
2513020848	1000001	1010000	0	0	0	0	0	0	0	0	0	0.148287	0	0	0	0	0.145141	0	0	0	0	0	0	0	0	0	0	0	0	0.236118	0.387157	0.308572	0.812085	0.624495	0.279191	0.440824	0.377739	0.872572	0.700419
2513020848	1005001	1015000	0.70292	0	0	0	0.525788	0	0	0	0	0.282756	0	0	0.144249	0.277397	0.277397	0.411479	0.419651	0	0.264759	0.266654	0.688591	0	0	0.144322	0	0.511672	0.123946	0.226194	0.386813	0.32559	0.799193	0.612025	0.279191	0.440824	0.377739	0.872572	0.700419
2513020848	1010001	1020000	0.70292	0	0	0	0.525788	0	0	0	0	0.141109	0	0	0.144249	0.277397	0.277397	0.411479	0.419651	0	0.397188	0.400086	0.688591	0	0	0.144322	0	0.511672	0.123946	0.226354	0.385517	0.326253	0.802259	0.616234	0.279191	0.440824	0.377739	0.872572	0.700419
2513020848	1015001	1025000	0.70292	0	0	0	0.525788	0	0	0	0	0.141109	0	0	0.144249	0.277397	0.138573	0.411479	0.419651	0	0.397188	0.400086	0.688591	0	0	0.144322	0	0.639708	0.123946	0.227439	0.387094	0.324643	0.807938	0.613564	0.279191	0.440824	0.377739	0.872572	0.700419
2513020848	1020001	1030000	0	0	0	0	0	0	0	0	0	0	0	0	0	0	0	0	0	0	0.13558	0.138547	0	0	0	0	0	0.131993	0	0.234825	0.387576	0.311924	0.817115	0.622667	0.279191	0.440824	0.377739	0.872572	0.700419
2513020848	1025001	1035000	0	0	0	0	0	0	0	0	0	0	0	0	0	0	0.140132	0	0	0	0	0	0	0	0	0	0	0.131993	0	0.23582	0.387286	0.311177	0.816314	0.623218	0.279191	0.440824	0.377739	0.872572	0.700419
2513020848	1030001	1040000	0	0	0.140021	0	0.13924	0	0	0	0	0	0	0	0	0	0.140132	0	0	0	0	0	0	0	0	0	0	0	0	0.235383	0.387121	0.307171	0.812075	0.621533	0.279191	0.440824	0.377739	0.872572	0.700419
2513020848	1035001	1045000	0	0	0.140021	0	0.13924	0	0	0	0	0	0	0	0	0	0.139293	0	0	0.141652	0.136798	0	0	0	0	0	0	0	0	0.229044	0.383437	0.309616	0.805141	0.622813	0.279191	0.440824	0.377739	0.872572	0.700419
2513020848	1040001	1050000	0	0	0.140021	0	0.13924	0	0	0	0	0	0	0	0	0	0	0	0	0.141652	0.136798	0	0	0	0	0	0	0	0	0.21727	0.381122	0.304342	0.795363	0.613023	0.279191	0.440824	0.377739	0.872572	0.700419
2513020848	1045001	1055000	1.42471	2.3392	2.15405	3.03295	2.3207	1.87306	2.25026	2.37942	1.48197	0.681688	0.705544	0.566854	0.846831	1.24447	0.95212	0.941062	0.849178	0.694385	1.05318	0.787498	1.09018	1.30517	0.817509	0.855217	0.287083	0.500007	0.486847	0.456301	0.07455	0.000715461	0.0412988	0.0751784	0.481425	0.440824	0.100622	0.872572	0.700419
2513020848	1050001	1060000	1.42471	2.3392	2.15405	3.18372	2.3207	2.01096	2.25026	2.37942	1.48197	0.681688	0.705544	0.566854	0.846831	1.24447	0.95212	0.941062	0.849178	0.555508	0.921205	0.790913	1.09018	1.30791	0.817509	0.855217	0.287083	0.500007	0.486847	0.365091	0.134459	0.00831914	0.19973	0.186316	0.390394	0.440824	0.377739	0.872572	0.700419
2513020848	1055001	1065000	1.42471	2.3392	2.15405	3.18372	2.3207	2.01096	2.25026	2.37942	1.48197	0.681688	0.705544	0.566854	0.846831	1.24447	0.95212	0.941062	0.849178	0.555508	0.921205	0.790913	1.09018	1.30791	0.817509	0.855217	0.287083	0.500007	0.486847	0.284219	0.225487	0.0638714	0.496315	0.379514	0.310914	0.440824	0.377739	0.872572	0.700419
2513020848	1060001	1070000	0	0	0	0.163179	0	0.148426	0	0	0	0	0	0	0	0	0	0	0	0	0	0	0	0	0.144951	0	0	0	0	0.238012	0.3869	0.306369	0.815578	0.619834	0.279191	0.440824	0.377739	0.872572	0.700419
2513020848	1065001	1075000	0	0	0	0	0	0	0	0	0	0	0	0	0	0	0	0	0	0	0	0	0	0	0.144951	0	0	0	0	0.237384	0.387717	0.310565	0.816827	0.622812	0.279191	0.440824	0.377739	0.872572	0.700419
2513020848	1070001	1080000	0	0	0	0	0	0	0	0	0	0	0	0	0	0	0	0	0	0	0	0	0	0.139939	0.144951	0	0	0	0	0.238264	0.386416	0.311704	0.817067	0.62267	0.279191	0.440824	0.377739	0.872572	0.700419
2513020848	1075001	1085000	0	0	0	0	0	0	0	0	0	0	0	0	0	0	0	0	0	0	0	0	0	0.139939	0	0	0	0	0	0.23743	0.386548	0.310982	0.816526	0.623061	0.279191	0.440824	0.377739	0.872572	0.700419
2513020848	1080001	1090000	0	0	0	0	0	0	0	0	0	0	0	0	0	0	0	0	0	0	0	0	0	0.139939	0	0	0	0	0	0.237525	0.386416	0.311103	0.816555	0.623045	0.279191	0.440824	0.377739	0.872572	0.700419
2513020848	1085001	1095000	0	0	0	0	0	0	0	0	0	0	0	0	0	0	0	0	0	0	0	0	0	0	0	0	0	0	0	0.236051	0.388488	0.309227	0.816099	0.623295	0.279191	0.440824	0.377739	0.872572	0.700419
2513020848	1090001	1100000	0	0	0	0	0	0	0	0	0	0	0	0	0	0	0	0	0	0	0	0	0	0	0	0	0	0	0	0.236051	0.388488	0.309227	0.816099	0.623295	0.279191	0.440824	0.377739	0.872572	0.700419
2513020848	1095001	1105000	0	0	0	0	0	0	0	0	0	0	0	0	0	0	0	0	0	0	0	0	0	0	0	0	0	0	0	0.236051	0.388488	0.309227	0.816099	0.623295	0.279191	0.440824	0.377739	0.872572	0.700419
2513020848	1100001	1110000	0.137624	0.13399	0.133503	0.133718	0.130908	0.13238	0.138851	0	0.129342	0	0	0	0	0	0	0	0	0	0	0	0	0	0	0	0	0	0	0.235168	0.385236	0.293051	0.808956	0.609371	0.279191	0.440824	0.377739	0.872572	0.700419
2513020848	1105001	1115000	0.137624	0.13399	0.133503	0.132363	0.130908	0.13238	0.138851	0	0.129342	0	0	0	0	0	0	0	0	0	0	0	0	0	0	0	0	0	0	0.235071	0.38485	0.291199	0.808112	0.607741	0.279191	0.440824	0.377739	0.872572	0.700419
2513020848	1110001	1120000	0.137624	0.13399	0.133503	0.132363	0.130908	0.13238	0.138851	0	0.129342	0	0	0	0	0	0	0	0	0	0	0	0	0	0	0	0	0	0	0.235101	0.384967	0.291763	0.808369	0.608237	0.279191	0.440824	0.377739	0.872572	0.700419
2513020848	1115001	1125000	0	0	0	0	0.13649	0	0	0	0	0	0	0	0	0	0	0.145065	0	0	0	0.139693	0	0	0	0	0	0	0	0.234367	0.39049	0.310356	0.812331	0.624587	0.279191	0.440824	0.377739	0.872572	0.700419
2513020848	1120001	1130000	0	0	0	0	0.13649	0	0	0	0	0	0	0	0	0	0	0.145065	0	0	0	0.139693	0	0	0	0	0	0	0	0.233242	0.391863	0.311139	0.809763	0.625481	0.279191	0.440824	0.377739	0.872572	0.700419
2513020848	1125001	1135000	0	0	0	0	0.13649	0	0	0	0	0	0	0	0	0	0	0.142151	0	0	0	0.136533	0	0	0	0	0	0	0	0.231765	0.393653	0.314007	0.809076	0.626526	0.279191	0.440824	0.377739	0.872572	0.700419
2513020848	1130001	1140000	0	0	0	0	0	0	0	0	0	0	0	0	0	0	0	0	0	0	0	0	0	0	0	0	0	0	0	0.236051	0.388488	0.310385	0.817799	0.623244	0.279191	0.440824	0.377739	0.872572	0.700419
2513020848	1135001	1145000	0	0	0	0	0	0.148241	0	0	0	0	0	0	0	0	0	0.142278	0.15024	0.149831	0	0.137023	0.149285	0.14105	0.147476	0	0	0	0.129421	0.237055	0.384177	0.319611	0.817713	0.623005	0.279191	0.440824	0.377739	0.872572	0.700419
2513020848	1140001	1150000	0	0	0	0	0	0.148241	0	0	0	0	0	0	0	0	0	0.145372	0.15024	0.149831	0	0.140903	0.149285	0.14105	0.147476	0	0	0	0.129421	0.236851	0.384933	0.317364	0.816684	0.623124	0.279191	0.440824	0.377739	0.872572	0.700419
2513020848	1145001	1155000	0	0	0	0	0	0.148241	0	0	0	0	0	0	0	0	0	0.145372	0.15024	0.149831	0	0.140903	0.149285	0.278011	0.147476	0	0	0	0.129421	0.238025	0.382867	0.320186	0.817067	0.622918	0.279191	0.440824	0.377739	0.872572	0.700419
2513020848	1150001	1160000	0	0	0	0	0	0	0	0	0	0	0	0	0	0	0	0	0	0	0	0	0	0.137205	0	0	0	0	0	0.237251	0.386797	0.310755	0.816472	0.623091	0.279191	0.440824	0.377739	0.872572	0.700419
2513020848	1155001	1165000	0	0	0	0	0	0	0	0	0	0	0	0	0	0	0	0	0	0	0	0	0	0.137577	0	0	0	0	0	0.237385	0.38661	0.310926	0.816513	0.623068	0.279191	0.440824	0.377739	0.872572	0.700419
2513020848	1160001	1170000	0	0	0	0	0	0	0	0	0	0	0	0	0	0	0	0	0	0	0	0.135849	0	0	0	0	0	0	0	0.233758	0.387686	0.31078	0.815547	0.623794	0.279191	0.440824	0.377739	0.872572	0.700419
2513020848	1165001	1175000	0	0	0	0.134156	0.140991	0	0	0	0	0	0	0	0	0	0	0	0.146787	0	0	0.278957	0	0.137885	0.142088	0	0	0	0	0.233665	0.384315	0.318281	0.812601	0.621495	0.279191	0.440824	0.377739	0.872572	0.700419
2513020848	1170001	1180000	0	0	0	0.132153	0.140991	0	0	0	0	0	0	0	0	0	0	0	0.146787	0	0	0.271615	0	0.13779	0.142088	0	0	0	0	0.233885	0.384509	0.317876	0.812791	0.621565	0.279191	0.440824	0.377739	0.872572	0.700419
2513020848	1175001	1185000	0.155225	0	0	0.132153	0.140991	0	0	0	0	0	0	0	0	0	0	0	0.146787	0	0	0.139478	0	0.275627	0.142088	0	0	0	0	0.234695	0.382311	0.316215	0.809905	0.615222	0.279191	0.440824	0.377739	0.872572	0.700419
2513020848	1180001	1190000	0.155225	0	0	0	0	0	0	0	0	0	0	0	0	0	0	0	0	0	0	0	0	0.137813	0	0	0	0	0	0.234367	0.385368	0.308828	0.81241	0.617099	0.279191	0.440824	0.377739	0.872572	0.700419
2513020848	1185001	1195000	0.155225	0	0	0	0	0	0	0	0	0	0	0	0	0.144213	0	0.140786	0	0.145217	0	0	0	0.137813	0	0	0	0	0	0.228364	0.386751	0.313215	0.806657	0.624015	0.279191	0.440824	0.377739	0.872572	0.700419
2513020848	1190001	1200000	0	0	0	0	0	0	0	0	0	0	0	0	0	0.144213	0	0.140786	0	0.145217	0	0	0	0	0	0	0	0	0	0.228661	0.389111	0.314791	0.808346	0.62972	0.279191	0.440824	0.377739	0.872572	0.700419
2513020848	1195001	1205000	0	0	0	0.277045	0	0	0	0	0	0	0	0	0	0.144213	0	0.140786	0	0.145217	0.132627	0	0	0.267077	0	0.144652	0	0	0	0.229921	0.388325	0.322351	0.806903	0.624407	0.279191	0.440824	0.377739	0.872572	0.700419
2513020848	1200001	1210000	0	0	0	0.277045	0	0	0	0	0	0	0	0	0	0	0	0	0	0	0.267907	0.133415	0	0.267077	0	0.144652	0	0	0	0.23409	0.385219	0.327551	0.810218	0.618457	0.279191	0.440824	0.377739	0.872572	0.700419
2513020848	1205001	1215000	0	0	0	0.277045	0	0	0	0	0	0	0	0	0	0	0	0	0	0	0.267907	0.135316	0	0.269256	0	0.144652	0	0	0	0.234459	0.385833	0.322987	0.81145	0.618912	0.279191	0.440824	0.377739	0.872572	0.700419
2513020848	1210001	1220000	0	0	0	0.155921	0	0	0	0	0	0	0	0	0	0	0.146288	0	0	0	0.135417	0.13753	0	0	0	0	0	0	0	0.232305	0.384812	0.312078	0.808804	0.625167	0.279191	0.440824	0.377739	0.872572	0.700419
2513020848	1215001	1225000	0	0	0	0.155921	0	0	0	0	0	0	0	0	0	0	0.146288	0	0	0	0	0	0	0	0	0	0	0	0	0.235141	0.387121	0.308439	0.811955	0.623442	0.279191	0.440824	0.377739	0.872572	0.700419
2513020848	1220001	1230000	0	0	0	0.295574	0	0	0	0	0	0	0	0	0	0	0.146288	0	0	0	0	0	0	0	0	0	0	0	0	0.234642	0.38761	0.306267	0.810851	0.621466	0.279191	0.440824	0.377739	0.872572	0.700419
2513020848	1225001	1235000	0	0	0	0.14909	0	0	0	0	0	0	0	0	0	0	0	0	0	0	0	0	0	0	0	0	0	0	0	0.235545	0.389001	0.307005	0.815034	0.621263	0.279191	0.440824	0.377739	0.872572	0.700419
2513020848	1230001	1240000	0	0	0	0.14909	0	0	0	0	0	0	0	0	0	0	0	0	0	0	0.139162	0.139162	0	0	0	0	0	0	0	0.233637	0.387538	0.310581	0.813531	0.623012	0.279191	0.440824	0.377739	0.872572	0.700419
2513020848	1235001	1245000	0	0	0	0	0	0	0	0	0	0	0	0	0	0	0	0	0	0	0.139162	0.139162	0	0	0	0	0	0	0	0.234157	0.387061	0.312711	0.814594	0.624966	0.279191	0.440824	0.377739	0.872572	0.700419
2513020848	1240001	1250000	0	0	0	0	0	0	0	0	0	0	0	0	0	0	0	0	0	0	0.139162	0.139162	0	0	0	0	0	0	0	0.234138	0.387047	0.312746	0.814579	0.624983	0.279191	0.440824	0.377739	0.872572	0.700419
2513020848	1245001	1255000	0.146125	0	0.146871	0.275436	0	0.287501	0	0	0	0	0	0	0	0.142798	0	0	0.142765	0.140728	0.27116	0.136843	0.138598	0.138522	0.419079	0	0	0.128107	0.136643	0.232978	0.375827	0.319046	0.81339	0.607377	0.279191	0.440824	0.377739	0.872572	0.700419
2513020848	1250001	1260000	0.146125	0	0.146871	0.275436	0	0.287501	0	0	0	0	0	0	0	0.142798	0	0	0.142765	0.140728	0.401045	0.135975	0.138598	0.138522	0.419079	0	0	0.128107	0.13066	0.233148	0.375017	0.320642	0.811991	0.608239	0.279191	0.440824	0.377739	0.872572	0.700419
2513020848	1255001	1265000	0.146125	0	0.146871	0.275963	0	0.287501	0	0	0	0	0	0	0	0.142798	0	0	0.142765	0.140728	0.401045	0.135975	0.138598	0.138522	0.419079	0	0	0.128107	0.134362	0.232994	0.374119	0.321441	0.811889	0.607076	0.279191	0.440824	0.377739	0.872572	0.700419
2513020848	1260001	1270000	0	0	0	0	0	0	0	0	0	0	0	0	0	0	0	0	0	0	0.132947	0	0	0	0.136273	0	0	0	0	0.237464	0.387197	0.314328	0.816403	0.62219	0.279191	0.440824	0.377739	0.872572	0.700419
2513020848	1265001	1275000	0	0	0	0	0	0	0	0	0	0	0	0	0	0	0	0	0	0	0	0	0	0	0.136273	0	0	0	0	0.237456	0.387676	0.313676	0.817355	0.621281	0.279191	0.440824	0.377739	0.872572	0.700419
2513020848	1270001	1280000	0	0	0	0	0	0	0	0	0	0	0	0	0	0	0	0	0	0	0	0	0	0	0.136273	0	0	0	0	0.237431	0.387691	0.313595	0.817333	0.621318	0.279191	0.440824	0.377739	0.872572	0.700419
2513020848	1275001	1285000	0	0	0	1.00192	0	0	0	0	0	0	0	0	0	0	0	0	0	0	0	0.133862	0	0	0	0	0	0	0	0.226951	0.393852	0.287512	0.804255	0.600541	0.279191	0.440824	0.377739	0.872572	0.700419
2513020848	1280001	1290000	1.45065	1.10959	1.04892	2.22826	1.49026	1.08763	1.25245	2.19713	1.03944	2.31681	2.68801	3.60329	3.2321	1.29727	2.13902	2.48893	2.17427	2.50491	0.94665	1.0709	3.76019	1.63553	1.57972	1.76246	2.49898	1.55656	1.75346	0.326527	0.63271	0.292053	0.900994	0.847208	0.351371	0.659397	0.377739	0.915638	0.867658
2513020848	1285001	1295000	1.45065	1.10959	1.04892	2.22534	1.62672	1.08763	1.25245	2.19713	1.03944	2.31681	2.68801	3.60329	3.2321	1.29727	2.13902	2.48893	2.17427	2.64407	0.94665	1.0709	3.76019	1.63553	1.57972	1.76246	2.49898	1.55656	1.75346	0.336901	0.684121	0.289536	0.91511	0.876481	0.362206	0.706151	0.377739	0.928395	0.889965
2513020848	1290001	1300000	1.45065	1.10959	1.04892	1.21217	1.62672	1.08763	1.25245	2.19713	1.03944	2.31681	2.68801	3.60329	3.2321	1.29727	2.13902	2.48893	2.17427	2.64407	0.94665	0.940797	3.76019	1.63553	1.57972	1.76246	2.49898	1.55656	1.75346	0.314308	0.591246	0.309553	0.898606	0.840741	0.339144	0.617813	0.377739	0.913993	0.861778
2513020848	1295001	1305000	0	0	0	0	0.140757	0	0	0	0	0	0	0	0	0.145217	0	0	0	0.143335	0	0	0	0.13649	0	0	0	0	0	0.225999	0.383703	0.312786	0.812193	0.628372	0.279191	0.440824	0.377739	0.872572	0.700419
2513020848	1300001	1310000	0.146329	0	0	0	0	0	0	0	0	0	0	0	0	0.145217	0	0.139829	0	0	0.135601	0.137228	0	0.271698	0	0	0	0	0	0.230422	0.383881	0.323042	0.806183	0.6223	0.279191	0.440824	0.377739	0.872572	0.700419
2513020848	1305001	1315000	0.146329	0	0	0	0	0	0	0	0	0	0	0	0	0.145217	0	0.139829	0	0	0.13379	0.134268	0	0.405767	0	0	0	0	0	0.232485	0.382985	0.325758	0.808551	0.620456	0.279191	0.440824	0.377739	0.872572	0.700419
2513020848	1310001	1320000	0.146329	0	0	0	0	0	0	0	0	0	0	0	0	0	0	0.28204	0	0	0.13379	0.134268	0	0.267435	0	0	0	0	0	0.236333	0.388212	0.323364	0.809602	0.620109	0.279191	0.440824	0.377739	0.872572	0.700419
2513020848	1315001	1325000	0	0	0	0.388939	0	0	0	0	0	0	0	0	0	0.137695	0	0.134899	0	0	0	0	0	0.129394	0	0	0	0	0	0.233154	0.390055	0.309871	0.80938	0.621386	0.279191	0.440824	0.377739	0.872572	0.700419
2513020848	1320001	1330000	0	0	0	0.388939	0	0	0	0	0	0	0	0	0	0.137695	0.136446	0.134899	0	0	0	0	0.278115	0.129394	0.13556	0	0	0.127883	0	0.237736	0.384962	0.313672	0.810322	0.623744	0.279191	0.440824	0.377739	0.872572	0.700419
2513020848	1325001	1335000	0	0	0	0.388939	0	0	0	0	0	0	0	0	0	0.137695	0.136446	0	0	0	0	0	0.278115	0.129394	0.13556	0	0	0.127883	0	0.236501	0.380639	0.312521	0.812323	0.621258	0.279191	0.440824	0.377739	0.872572	0.700419
2513020848	1330001	1340000	0	0.142798	0	0	0	0	0	0	0	0	0	0.140555	0	0	0.139585	0	0	0	0.136512	0	0.272204	0.132396	0.138749	0	0	0.127166	0	0.243955	0.387733	0.314915	0.816638	0.623808	0.279191	0.440824	0.377739	0.872572	0.700419
2513020848	1335001	1345000	0	0.142798	0	0	0	0	0	0	0	0	0	0.140555	0	0.146084	0	0	0	0.145724	0.276795	0	0	0	0	0	0	0	0	0.228815	0.39151	0.31225	0.808313	0.628637	0.279191	0.440824	0.377739	0.872572	0.700419
2513020848	1340001	1350000	0	0.142798	0.139425	0	0.139372	0	0	0	0	0	0	0.148333	0	0.146084	0	0	0	0.287925	0.276795	0	0	0	0	0	0	0.129903	0	0.227244	0.38994	0.310733	0.810914	0.62269	0.279191	0.440824	0.377739	0.872572	0.700419
2513020848	1345001	1355000	0	0	0.139425	0	0.139372	0	0	0	0	0.144763	0	0	0	0.146084	0	0	0	0.287925	0.281111	0	0	0	0	0	0	0.129903	0	0.226068	0.385236	0.312048	0.810724	0.623471	0.279191	0.440824	0.377739	0.872572	0.700419
2513020848	1350001	1360000	0	0	0.139425	0.142667	0.139372	0	0	0	0	0.144763	0	0	0	0	0	0	0	0.142375	0.140641	0	0	0	0	0	0	0.129903	0	0.231336	0.387717	0.305193	0.813417	0.616879	0.279191	0.440824	0.377739	0.872572	0.700419
2513020848	1355001	1365000	0	0	0	0.284176	0.275915	0	0	0	0	0.144763	0.146999	0	0.143927	0	0.144431	0	0.149383	0.146452	0.280656	0.137343	0	0	0.141318	0	0	0	0.127446	0.230025	0.384305	0.305339	0.81375	0.632455	0.279191	0.440824	0.377739	0.872572	0.700419
2513020848	1360001	1370000	0	0	0	0.284176	0.275915	0	0	0	0	0	0.146999	0	0.291055	0	0.144431	0	0.149383	0.146452	0.272805	0.274456	0	0	0.141318	0	0	0	0.125143	0.220998	0.392928	0.305844	0.832288	0.676436	0.279191	0.440824	0.377739	0.872572	0.718789
2513020848	1365001	1375000	0	0	0	0.139994	0.275915	0	0	0	0	0	0.146999	0	0.291055	0	0.144431	0	0.149383	0.146452	0.272805	0.274456	0	0	0.141318	0	0	0	0.125143	0.229136	0.389575	0.311208	0.825934	0.653155	0.279191	0.440824	0.377739	0.872572	0.700947
2513020848	1370001	1380000	0	0	0	0	0	0	0	0	0	0	0	0	0.147258	0	0	0	0	0	0.137205	0.137114	0	0	0	0	0	0	0	0.235823	0.395001	0.309232	0.823764	0.643146	0.279191	0.440824	0.377739	0.872572	0.700419
2513020848	1375001	1385000	0	0	0	0	0	0	0	0	0	0	0	0	0	0	0	0	0	0	0	0	0	0	0	0	0	0	0	0.236051	0.388488	0.309227	0.816099	0.623295	0.279191	0.440824	0.377739	0.872572	0.700419
2513020848	1380001	1390000	0	0	0	0	0	0.142342	0	0	0.137671	0	0	0	0	0	0	0	0	0	0	0	0	0	0	0	0	0	0	0.236933	0.386463	0.304667	0.8191	0.624464	0.279191	0.440824	0.377739	0.872572	0.700419
2513020848	1385001	1395000	0	0	0	0	0.13924	0.142342	0	0	0.137671	0	0	0	0	0	0	0	0	0.138851	0	0.13116	0	0.131787	0.142864	0	0	0	0.12748	0.233596	0.382285	0.314848	0.822299	0.619549	0.279191	0.440824	0.377739	0.872572	0.700419
2513020848	1390001	1400000	0	0	0	0	0.13924	0.142342	0	0	0.137671	0	0	0	0	0	0	0	0	0.138851	0	0.13116	0	0.131787	0.142864	0	0	0	0.128481	0.233922	0.383088	0.314113	0.821542	0.620012	0.279191	0.440824	0.377739	0.872572	0.700419
2513020848	1395001	1405000	0	0	0	0	0.13924	0	0	0	0	0	0	0	0	0	0	0	0	0.138851	0	0.268611	0	0.131787	0.142864	0	0	0	0.128481	0.231436	0.383462	0.318517	0.819466	0.619568	0.279191	0.440824	0.377739	0.872572	0.700419
2513020848	1400001	1410000	0	0	0	0	0	0	0	0	0	0	0	0	0	0	0	0	0	0	0	0.138348	0	0	0	0	0	0	0	0.233092	0.387453	0.311237	0.815386	0.623941	0.279191	0.440824	0.377739	0.872572	0.700419
2513020848	1405001	1415000	0	0.142634	0	0.145764	0.137671	0.13924	0.143404	0.144141	0.137205	0	0	0	0.148426	0.14637	0.142183	0.141318	0.144541	0.431252	0.408884	0.413297	0.143786	0.133917	0.286876	0	0	0	0.12793	0.201171	0.33503	0.347702	0.782682	0.679903	0.279191	0.440824	0.383894	0.872572	0.721183
2513020848	1410001	1420000	0	0.142634	0	0.145764	0.137205	0.13924	0.143404	0.144141	0.137205	0	0	0	0.148426	0.14637	0.142183	0.141318	0.144541	0.431252	0.404992	0.402246	0.143786	0.268837	0.286876	0	0	0	0.128716	0.166914	0.251861	0.434141	0.686759	0.767161	0.279191	0.440824	0.457639	0.872572	0.79822
2513020848	1415001	1425000	0	0.142634	0	0.144876	0.273552	0.273198	0.143404	0.144141	0.137205	0	0	0.141438	0.287783	0.283365	0.142183	0.141318	0.282336	0.568858	0.535159	0.533449	0.143786	0.401751	0.426739	0.142504	0	0.125304	0.128716	0.199167	0.360694	0.366328	0.798585	0.699161	0.279191	0.440824	0.399264	0.872572	0.737089
2513020848	1420001	1430000	0	0	0	0	0.136273	0.134362	0	0	0	0	0	0.141438	0.140356	0.138078	0	0	0.138423	0.136776	0.13116	0.265354	0	0.262955	0.13558	0.142504	0	0.125304	0	0.228459	0.393028	0.322142	0.818968	0.638255	0.279191	0.440824	0.377739	0.872572	0.700419
2513020848	1425001	1435000	0	0	0	0	0.135766	0.134362	0	0	0	0	0	0.141438	0.140356	0.138078	0	0	0.138423	0.136776	0.130603	0.13174	0	0.262955	0.13558	0.142504	0	0.125304	0	0.232124	0.392586	0.317706	0.818765	0.634283	0.279191	0.440824	0.377739	0.872572	0.700419
2513020848	1430001	1440000	0	0	0	0	0	0	0	0	0	0	0	0	0	0	0	0	0	0	0	0	0	0.132998	0	0	0	0	0	0.237026	0.387113	0.310468	0.816403	0.623129	0.279191	0.440824	0.377739	0.872572	0.700419
2513020848	1435001	1445000	0	0	0	0	0	0	0	0	0	0	0	0	0	0	0	0	0	0	0	0	0	0.134705	0	0	0	0	0	0.237545	0.386388	0.311129	0.816561	0.623042	0.279191	0.440824	0.377739	0.872572	0.700419
2513020848	1440001	1450000	0	0	0	0	0	0	0	0	0	0	0	0	0	0	0.139032	0	0	0.142025	0.131462	0	0	0.134532	0	0	0	0	0	0.232708	0.383328	0.318565	0.811812	0.625558	0.279191	0.440824	0.377739	0.872572	0.700419
2513020848	1445001	1455000	0	0	0.14047	0	0	0	0.144876	0	0	0	0	0	0	0.145449	0.139032	0	0	0.142025	0.266654	0.135724	0	0.270713	0.142183	0	0	0	0	0.229766	0.376273	0.322734	0.805686	0.625666	0.279191	0.440824	0.377739	0.872572	0.700419
2513020848	1450001	1460000	0	0	0.14047	0	0.141962	0	0.144876	0	0	0	0	0	0	0.145449	0.139032	0.139939	0	0.142025	0.402469	0.270431	0	0.270713	0.142183	0	0	0	0	0.23037	0.3803	0.321003	0.804926	0.626525	0.279191	0.440824	0.377739	0.872572	0.700419
2513020848	1455001	1465000	0	0	0.141469	0	0.142183	0	0.144876	0	0	0	0	0	0	0.289229	0	0.279713	0	0.139802	0.404	0.403142	0	0.270713	0.142183	0	0	0	0	0.227965	0.383085	0.319476	0.803315	0.629293	0.279191	0.440824	0.377739	0.872572	0.700419
2513020848	1460001	1470000	0	0.137137	0.131447	0	0.142183	0	0	0	0	0.14102	0	0.146871	0	0.143856	0	0.279713	0	0.283181	0.403256	0.268424	0.142471	0.269681	0	0	0	0	0	0.229138	0.389435	0.316873	0.801297	0.62825	0.279191	0.440824	0.377739	0.872572	0.700419
2513020848	1465001	1475000	0.294689	0.138699	0.411342	0.855217	0	0.281398	0.292905	0.141348	0	0.14102	0	0.146871	0.146452	0.431568	0.278691	0.412519	0.284943	0.423415	0.403256	0.268461	0.280042	0.404522	0.139319	0.150553	0.302944	0.13338	0.128892	0.222623	0.386851	0.315485	0.778145	0.61701	0.279191	0.440824	0.377739	0.872572	0.700419
2513020848	1470001	1480000	1.18815	0.989014	1.66869	1.98399	1.1456	1.41168	1.04296	0.873399	0.682448	0.87223	0.895708	1.05915	0.908501	1.30054	1.41258	1.42634	1.344	0.994615	1.07857	1.22979	1.45372	1.36643	1.14291	1.87021	0.755712	2.53677	2.40756	0.236765	0.374572	0.59193	0.92644	0.25892	0.279191	0.440824	0.610427	0.935099	0.700419
2513020848	1475001	1485000	1.64267	0.84936	1.52992	1.97719	1.1456	1.41168	1.04296	1.31403	0.820524	0.728819	1.04776	0.908833	0.908501	1.58955	1.92298	1.87808	1.94134	0.85121	1.36038	1.68943	1.78223	1.69909	1.43233	2.0725	0.755712	3.19142	2.50727	0.23328	0.316554	0.540772	0.885984	0.441549	0.279191	0.440824	0.561571	0.904252	0.700419
2513020848	1480001	1490000	1.34533	0.990921	1.25435	1.26423	1.14945	1.15603	0.746668	1.17668	0.820925	0.73185	1.04776	0.908833	0.757361	1.34848	1.63893	1.61007	1.65436	0.861666	1.27295	1.58359	1.68011	1.56021	1.35123	1.98295	0.453427	3.04957	2.37204	0.233805	0.35153	0.410365	0.864736	0.539841	0.279191	0.440824	0.437625	0.887905	0.700419
2513020848	1485001	1495000	0.500743	0.140077	0	0.139666	0	0	0	0.482521	0.151639	0	0.162073	0	0	0.312128	0.46547	0.460774	0.640829	0.145567	0.441643	0.443226	0.465063	0.438618	0.310313	0.166668	0	0.597926	0.139293	0.233582	0.366896	0.333181	0.801238	0.623939	0.279191	0.440824	0.377739	0.872572	0.700419
2513020848	1490001	1500000	0	0.140077	0	0.140077	0	0	0	0	0	0	0	0	0	0	0	0	0	0.145567	0	0	0	0	0	0	0	0	0	0.233483	0.387998	0.307749	0.813272	0.619972	0.279191	0.440824	0.377739	0.872572	0.700419
2513020848	1495001	1505000	0	0	0	0	0	0	0	0	0	0	0	0	0	0	0	0	0	0	0	0	0	0	0	0	0	0	0	0.236051	0.388488	0.309825	0.816992	0.623266	0.279191	0.440824	0.377739	0.872572	0.700419
2513020848	1500001	1510000	0	0	0	0.137506	0	0	0	0	0	0	0	0	0	0	0	0	0	0	0	0	0	0.136038	0	0	0	0	0	0.237032	0.386842	0.309331	0.81657	0.620239	0.279191	0.440824	0.377739	0.872572	0.700419
2513020848	1505001	1515000	0	0	0.144726	0.137766	0	0	0	0	0	0	0	0	0	0.142088	0	0	0	0	0.277145	0.135891	0.141683	0.136038	0	0	0	0	0	0.232232	0.38243	0.315648	0.806915	0.622431	0.279191	0.440824	0.377739	0.872572	0.700419
2513020848	1510001	1520000	0	0	0.144726	0.138598	0	0	0	0	0	0	0	0	0	0.142088	0	0	0	0	0.277145	0.135891	0.141683	0.136038	0	0	0	0	0	0.232863	0.383443	0.31454	0.808483	0.62256	0.279191	0.440824	0.377739	0.872572	0.700419
2513020848	1515001	1525000	0	0	0.144726	0	0	0	0	0	0	0	0	0	0	0.142088	0	0	0	0	0.272719	0.135891	0.141683	0	0	0	0	0	0	0.232907	0.385315	0.313995	0.809652	0.624783	0.279191	0.440824	0.377739	0.872572	0.700419
2513020848	1520001	1530000	0	0	0	0.682013	0	0	0	0	0	0	0	0	0	0	0	0	0	0	0	0	0	0	0	0	0	0	0	0.234258	0.390396	0.301743	0.812199	0.616306	0.279191	0.440824	0.377739	0.872572	0.700419
2513020848	1525001	1535000	0	0	0	0.681796	0	0	0	0	0	0	0.152917	0	0	0	0	0	0	0	0.135996	0	0	0	0	0	0	0	0.127548	0.234469	0.38742	0.299521	0.816903	0.610645	0.279191	0.440824	0.377739	0.872572	0.700419
2513020848	1530001	1540000	0	0	0.172246	0.681365	0.173897	0	0	0	0	0	0.152917	0	0	0	0	0	0	0	0.280153	0.136577	0	0.14153	0	0	0	0	0.127548	0.232482	0.383242	0.296514	0.811738	0.602618	0.279191	0.440824	0.377739	0.872572	0.700419
2513020848	1535001	1545000	0	0	0.172246	0	0.173897	0	0	0	0	0	0.152917	0	0	0	0	0	0	0	0.28204	0.141775	0	0.14153	0	0	0	0	0.130574	0.235079	0.378341	0.309365	0.818481	0.612239	0.279191	0.440824	0.377739	0.872572	0.700419
2513020848	1540001	1550000	0	0	0.145027	0	0.304766	0	0	0	0	0	0	0	0	0	0	0	0	0	0.142025	0.135458	0	0.14153	0	0	0	0	0	0.23284	0.383052	0.306501	0.809932	0.614692	0.279191	0.440824	0.377739	0.872572	0.700419
2513020848	1545001	1555000	0	0	0	0	0.142798	0	0	0	0	0	0	0	0	0	0	0	0	0	0.138497	0	0	0	0	0	0	0	0	0.235504	0.387246	0.309249	0.81504	0.62248	0.279191	0.440824	0.377739	0.872572	0.700419
2513020848	1550001	1560000	0	0	0	0	0.142798	0	0	0	0	0	0	0	0	0	0	0	0	0.142931	0.138497	0.134456	0	0	0	0	0	0.128299	0	0.218514	0.381817	0.320923	0.817289	0.620608	0.279191	0.440824	0.377739	0.872572	0.700419
2513020848	1555001	1565000	0.143507	0.139639	0.136798	0	0.271037	0	0.141198	0	0.135096	0	0	0	0.145963	0.142569	0	0.140385	0	0.287501	0.405948	0.403369	0.143438	0.134008	0.142536	0	0	0.128299	0	0.21918	0.379975	0.31915	0.802298	0.626865	0.279191	0.440824	0.377739	0.872572	0.700419
2513020848	1560001	1570000	0.143507	0.139639	0.136798	0	0.271037	0	0.141198	0	0.135096	0	0	0	0.145963	0.142569	0	0.136978	0	0.287501	0.267652	0.403369	0.143438	0.134008	0.142536	0	0	0.128299	0	0.219157	0.380988	0.316739	0.804013	0.625731	0.279191	0.440824	0.377739	0.872572	0.700419
2513020848	1565001	1575000	0.143507	0.139639	0.136798	0	0.410195	0	0.141198	0	0.271992	0	0	0	0.145963	0.142569	0	0.136978	0	0.144578	0.267652	0.26722	0.143438	0.268913	0.142536	0	0	0	0	0.22989	0.382202	0.30782	0.80624	0.62593	0.279191	0.440824	0.377739	0.872572	0.700419
2513020848	1570001	1580000	0	0	0	0	0.139884	0	0	0	0.136955	0	0	0	0	0	0	0	0	0	0	0	0	0.134456	0	0	0	0	0	0.236705	0.3862	0.306457	0.817299	0.623324	0.279191	0.440824	0.377739	0.872572	0.700419
2513020848	1575001	1585000	0	0	0.144876	0	0.134475	0	0	0	0.136955	0.273419	0	0.142798	0	0	0	0	0	0	0	0	0	0.132201	0	0	0	0	0	0.23754	0.393648	0.302619	0.814513	0.621469	0.279191	0.440824	0.377739	0.872572	0.700419
2513020848	1580001	1590000	0	0	0.144876	0	0.133327	0	0.144285	0	0	0.273419	0	0.142798	0	0	0	0	0	0	0	0	0	0	0	0	0	0	0	0.237145	0.395699	0.298984	0.812393	0.619568	0.279191	0.440824	0.377739	0.872572	0.700419
2513020848	1585001	1595000	0	0	0.144876	0	0.273597	0.13972	0.144285	0	0	0.273419	0	0.142798	0	0	0	0	0.145803	0	0	0	0	0	0	0	0	0	0	0.237665	0.393164	0.299334	0.810641	0.620574	0.279191	0.440824	0.377739	0.872572	0.700419
2513020848	1590001	1600000	0.144431	0	0	0.145606	0.426169	0.13972	0.298766	0	0	0	0	0	0	0	0	0.141438	0.145803	0	0.138423	0.278533	0	0.288498	0	0	0	0	0	0.233299	0.380994	0.30408	0.805282	0.618177	0.279191	0.440824	0.377739	0.872572	0.700419
2513020848	1595001	1605000	0.144431	0	0	0.145606	0.289303	0.143646	0.156645	0	0	0	0	0	0	0	0	0.141438	0.145803	0	0.138423	0.278533	0	0.288498	0	0	0	0	0	0.233809	0.383489	0.308249	0.807326	0.619937	0.279191	0.440824	0.377739	0.872572	0.700419
2513020848	1600001	1610000	0.144431	0	0	0.145606	0.147742	0	0.156645	0	0	0	0	0	0	0	0	0.141438	0	0	0.138423	0.278533	0	0.288498	0	0	0	0	0	0.232873	0.383882	0.309983	0.808861	0.619429	0.279191	0.440824	0.377739	0.872572	0.700419
2513020848	1605001	1615000	0	0	0	0	0	0	0	0	0	0	0	0	0	0	0	0	0	0	0	0	0	0	0	0	0	0	0	0.236051	0.388488	0.309227	0.816099	0.623295	0.279191	0.440824	0.377739	0.872572	0.700419
2513020848	1610001	1620000	0	0	0	0	0	0	0	0	0	0	0	0	0	0.140786	0	0	0	0	0	0	0	0	0	0	0	0	0	0.232693	0.387731	0.310616	0.813079	0.625627	0.279191	0.440824	0.377739	0.872572	0.700419
2513020848	1615001	1625000	0	0	0	0	0	0	0	0	0	0	0	0	0	0.140786	0	0	0	0	0	0	0	0	0	0.154292	0	0	0	0.232037	0.389741	0.314675	0.813572	0.624379	0.279191	0.440824	0.377739	0.872572	0.700419
2513020848	1620001	1630000	0	0	0	0	0	0	0	0	0	0	0	0	0	0.140786	0	0	0	0	0	0	0	0	0	0.154292	0	0	0	0.23131	0.389971	0.315679	0.81311	0.624578	0.279191	0.440824	0.377739	0.872572	0.700419
2513020848	1625001	1635000	0	0	0	0	0	0	0	0	0	0	0	0	0	0	0	0	0	0	0	0	0	0	0	0.154292	0	0	0	0.234973	0.390887	0.314289	0.816454	0.621948	0.279191	0.440824	0.377739	0.872572	0.700419
2513020848	1630001	1640000	0	0	0	0.409208	0	0	0	0	0	0	0	0	0	0	0	0	0	0	0	0	0	0	0	0	0	0	0	0.23439	0.390247	0.301842	0.812537	0.616509	0.279191	0.440824	0.377739	0.872572	0.700419
2513020848	1635001	1645000	0	0	0.137933	0.409208	0	0	0	0	0	0.139266	0	0	0	0	0.138775	0	0	0.138176	0.134802	0.134362	0.139162	0	0	0	0	0.127012	0	0.230405	0.38542	0.307714	0.807993	0.616315	0.279191	0.440824	0.377739	0.872572	0.700419
2513020848	1640001	1650000	0.143473	0	0.138673	0.409208	0	0	0	0	0	0.139266	0	0	0	0	0.138775	0	0	0.138176	0.269681	0.268762	0.139162	0	0.143098	0	0	0.128691	0	0.227064	0.381886	0.310491	0.803303	0.611706	0.279191	0.440824	0.377739	0.872572	0.700419
2513020848	1645001	1655000	0.143473	0	0.138673	0	0.135849	0.136732	0	0	0	0.139266	0	0	0.146165	0	0.138775	0	0	0.138176	0.405948	0.269295	0.139162	0.132445	0.143098	0	0	0.128691	0.130732	0.23084	0.376174	0.319533	0.816593	0.617022	0.279191	0.440824	0.377739	0.872572	0.700419
2513020848	1650001	1660000	0.143473	0	0	0	0.135849	0.136732	0	0	0	0	0	0	0.146165	0	0	0	0	0	0.271615	0.136295	0	0.134475	0.143098	0	0	0	0.130732	0.239953	0.382609	0.312422	0.829751	0.619291	0.279191	0.440824	0.377739	0.872572	0.700419
2513020848	1655001	1665000	0.14541	0	0.136798	0.144394	0.135849	0.275915	0	0	0	0	0	0.146661	0.146165	0	0	0	0	0.140104	0.135316	0	0	0.134475	0	0.151306	0	0	0.130732	0.226838	0.410064	0.298315	0.830646	0.603314	0.279191	0.448858	0.377739	0.872572	0.700419
2513020848	1660001	1670000	0.586978	0.439482	0.593148	0.597335	0.435194	0.579955	0.463661	0.449951	0.431042	0.419323	0.433623	0.584014	0.428098	0.421838	0.418837	0.417563	0.431042	0.567473	0.404992	0.401915	0.418515	0.401696	0.417563	0.579653	0.444999	0.378128	0.368993	0.213689	0.410633	0.288739	0.787623	0.600806	0.279191	0.448858	0.377739	0.872572	0.700419
2513020848	1665001	1675000	0.586978	0.439482	0.593148	0.597335	0.435194	0.579955	0.463661	0.449951	0.431042	0.419323	0.433623	0.584014	0.428098	0.421838	0.561879	0.417563	0.431042	0.567473	0.404992	0.401915	0.418515	0.401696	0.417563	0.579653	0.444999	0.379334	0.370624	0.146788	0.468327	0.248281	0.640223	0.545689	0.279191	0.496368	0.377739	0.872572	0.700419
2513020848	1670001	1680000	0.440234	0.439482	0.444861	0.451188	0.435194	0.435308	0.463661	0.449951	0.430729	0.419323	0.433623	0.436582	0.428098	0.421838	0.561879	0.417563	0.431042	0.425605	0.539675	0.401915	0.418515	0.535159	0.417563	0.432531	0.444999	0.379334	0.370624	0.242906	0.367023	0.311178	0.766424	0.651081	0.279191	0.440824	0.377739	0.872572	0.700543
2513020848	1675001	1685000	0	0	0	0	0	0	0	0	0	0	0	0	0	0	0.144177	0	0	0	0.131493	0	0	0.1311	0	0	0	0	0	0.238933	0.376682	0.322183	0.80592	0.631624	0.279191	0.440824	0.377739	0.872572	0.700419
2513020848	1680001	1690000	0	0	0	0	0	0	0	0	0	0	0.15098	0	0	0	0	0	0	0	0.131493	0	0	0.1311	0	0	0	0	0	0.237913	0.380392	0.310591	0.815657	0.626792	0.279191	0.440824	0.377739	0.872572	0.700419
2513020848	1685001	1695000	0.286535	0.151472	0.143542	0.136316	0.297415	0.300377	0.314643	0.157018	0.149334	0.29818	0.305355	0.308454	0.308584	0.299162	0.288935	0.288067	0.299162	0.297038	0.277095	0.41203	0.296666	0.275818	0.291846	0.315416	0.312128	0.135196	0.261903	0.230674	0.394923	0.325378	0.814963	0.637271	0.279191	0.440824	0.377739	0.872572	0.700419
2513020848	1690001	1700000	0.305474	0.151472	0.15322	0.136754	0.297415	0.300377	0.314643	0.157018	0.149334	0.29818	0.305355	0.308454	0.308584	0.299162	0.288935	0.288067	0.299162	0.297038	0.277095	0.549745	0.296666	0.413155	0.291846	0.315416	0.312128	0.135196	0.261903	0.229293	0.391715	0.327938	0.814175	0.636026	0.279191	0.440824	0.377739	0.872572	0.700419
2513020848	1695001	1705000	0.305474	0.151472	0.15322	0.137718	0.297415	0.300377	0.314643	0.157018	0.149334	0.29818	0.154554	0.308454	0.308584	0.299162	0.288935	0.288067	0.299162	0.297038	0.276895	0.549745	0.296666	0.413155	0.291846	0.315416	0.312128	0.135196	0.261815	0.231697	0.392194	0.323866	0.814458	0.631249	0.279191	0.440824	0.377739	0.872572	0.700419
2513020848	1700001	1710000	0	0	0	0	0	0	0	0	0	0	0	0	0	0	0	0	0	0	0	0.138151	0	0.137182	0	0	0	0	0	0.234993	0.386055	0.312235	0.815918	0.623574	0.279191	0.440824	0.377739	0.872572	0.700419
2513020848	1705001	1715000	0	0	0.145527	0.269333	0	0	0	0	0	0	0	0	0	0	0	0	0	0	0	0	0	0	0	0	0	0	0	0.235125	0.389443	0.30287	0.812051	0.616062	0.279191	0.440824	0.377739	0.872572	0.700419
2513020848	1710001	1720000	0	0	0.145527	0.269333	0	0	0	0	0	0	0	0	0	0	0	0	0	0	0	0	0	0	0	0	0	0	0	0.234704	0.389898	0.299946	0.810161	0.6127	0.279191	0.440824	0.377739	0.872572	0.700419
2513020848	1715001	1725000	0	0	0.145527	0.269333	0.135296	0	0	0	0	0	0	0	0	0	0	0	0.141228	0	0.132561	0.132153	0	0	0	0	0	0	0	0.233086	0.387942	0.309423	0.80778	0.616752	0.279191	0.440824	0.377739	0.872572	0.700419
2513020848	1720001	1730000	0.143542	0	0	0	0.135296	0	0	0	0	0	0	0	0	0	0	0	0.141228	0	0.265421	0.132153	0	0.13324	0	0	0	0	0	0.23333	0.384025	0.316953	0.809038	0.620811	0.279191	0.440824	0.377739	0.872572	0.700419
2513020848	1725001	1735000	0.288789	0	0	0	0.273956	0	0	0	0	0	0	0	0	0.140021	0	0	0.284557	0	0.398587	0.264273	0.141378	0.2661	0	0	0	0.130346	0	0.227775	0.377858	0.328405	0.802555	0.615589	0.279191	0.440824	0.377739	0.872572	0.700419
2513020848	1730001	1740000	0.288789	0	0	0	0.138851	0	0	0	0	0	0	0	0	0.140021	0	0	0.14337	0	0.266203	0.13212	0.141378	0.2661	0	0	0	0.130346	0	0.228885	0.378368	0.32251	0.805288	0.613055	0.279191	0.440824	0.377739	0.872572	0.700419
2513020848	1735001	1745000	0.145256	0	0	0	0.138851	0	0	0	0	0	0	0	0	0.140021	0	0	0.14337	0	0.133345	0.13212	0.141378	0.132879	0	0	0	0.130346	0	0.229911	0.381823	0.321241	0.809537	0.617543	0.279191	0.440824	0.377739	0.872572	0.700419
2513020848	1740001	1750000	0	0	0	0	0	0	0	0	0	0	0	0	0	0	0	0	0	0	0	0	0	0	0	0	0	0	0	0.236051	0.388488	0.309227	0.816099	0.623295	0.279191	0.440824	0.377739	0.872572	0.700419
2513020848	1745001	1755000	0.145843	0	0	0.143646	0	0	0.145606	0	0	0	0	0.15024	0	0	0	0	0	0	0	0	0	0	0.142246	0	0	0	0.128867	0.236357	0.391514	0.308292	0.821971	0.614666	0.279191	0.440824	0.377739	0.872572	0.700419
2513020848	1750001	1760000	0.145843	0	0	0.143646	0	0	0.145606	0	0	0	0	0.15024	0	0	0	0	0	0	0	0	0	0	0.142246	0	0	0	0.128867	0.236352	0.391489	0.308297	0.82192	0.61473	0.279191	0.440824	0.377739	0.872572	0.700419
2513020848	1755001	1765000	0.287014	0.138623	0.134138	0.273419	0.134268	0.135933	0.145606	0	0	0.142536	0	0.15024	0	0	0	0	0	0	0	0	0	0	0.142246	0	0	0	0.128867	0.235414	0.390741	0.296657	0.812525	0.59576	0.279191	0.440824	0.377739	0.872572	0.700419
2513020848	1760001	1770000	0.141469	0.138623	0.134138	0.134119	0.134268	0.135933	0	0	0	0.142536	0	0	0	0	0	0	0.143891	0	0	0.132879	0	0	0.14016	0	0	0	0	0.235315	0.386522	0.309699	0.807003	0.608125	0.279191	0.440824	0.377739	0.872572	0.700419
2513020848	1765001	1775000	0.141469	0.277397	0.134138	0.134119	0.134268	0.135933	0	0	0	0.142536	0	0	0	0	0	0	0.143891	0	0	0.133772	0	0	0.14016	0	0	0	0	0.236362	0.386689	0.308031	0.80614	0.60677	0.279191	0.440824	0.377739	0.872572	0.700419
2513020848	1770001	1780000	0	0.138775	0	0	0	0	0	0	0	0	0	0	0	0	0	0	0.143891	0	0	0.133772	0	0	0.14016	0	0	0	0	0.237123	0.387167	0.316998	0.812897	0.620227	0.279191	0.440824	0.377739	0.872572	0.700419
2513020848	1775001	1785000	0	0.138775	0	0	0	0	0	0	0	0	0	0	0	0	0	0	0	0	0	0	0	0	0	0	0	0	0	0.237337	0.38844	0.307109	0.813736	0.619444	0.279191	0.440824	0.377739	0.872572	0.700419
2513020848	1780001	1790000	0	0	0	0	0	0	0	0	0	0	0	0	0	0	0	0	0	0	0	0	0	0.131993	0	0	0	0	0	0.23739	0.386603	0.310932	0.816514	0.623068	0.279191	0.440824	0.377739	0.872572	0.700419
2513020848	1785001	1795000	0	0	0	0	0	0	0	0	0	0	0	0	0	0	0	0	0	0	0	0	0	0.131929	0	0	0	0	0	0.237403	0.386585	0.310949	0.816518	0.623065	0.279191	0.440824	0.377739	0.872572	0.700419
2513020848	1790001	1800000	0	0	0	0	0	0	0	0	0	0	0	0	0	0	0	0	0	0	0	0	0	0.131929	0	0	0	0	0	0.237249	0.3868	0.310752	0.816471	0.623091	0.279191	0.440824	0.377739	0.872572	0.700419
2513020848	1795001	1805000	0.140815	0	0	0	0	0	0	0	0.135807	0	0	0	0	0	0	0.139188	0	0	0.136187	0.136273	0	0.133432	0	0	0	0	0	0.233763	0.386413	0.315286	0.813049	0.62266	0.279191	0.440824	0.377739	0.872572	0.700419
2513020848	1800001	1810000	0.140815	0	0	0	0	0	0	0	0.135807	0	0	0	0	0	0	0.139188	0	0	0.133033	0.136273	0	0.135236	0	0	0	0	0	0.233641	0.386279	0.315636	0.812877	0.622592	0.279191	0.440824	0.377739	0.872572	0.700419
2513020848	1805001	1815000	0.282816	0.137046	0.131993	0.136446	0.134249	0	0	0	0.135807	0	0	0	0.146619	0	0	0.139188	0	0.143438	0.399098	0.545784	0.142569	0.270471	0.142699	0	0	0	0	0.225524	0.381506	0.315813	0.802502	0.619257	0.279191	0.440824	0.377739	0.872572	0.700419
2513020848	1810001	1820000	0.142025	0.137046	0.131993	0.136446	0.134249	0	0	0	0	0	0	0	0.146619	0	0	0	0	0.143438	0.265997	0.409864	0.142569	0.13238	0.142699	0.141744	0	0	0	0.223854	0.385864	0.311687	0.803489	0.619634	0.279191	0.440824	0.377739	0.872572	0.700419
2513020848	1815001	1825000	0.142025	0.137046	0.131993	0.136446	0.134249	0	0	0	0	0	0	0	0.146619	0	0.136187	0	0	0.143438	0.263078	0.409864	0.142569	0.13238	0.142699	0.141744	0	0	0	0.206039	0.375466	0.324508	0.772867	0.624892	0.279191	0.440824	0.377739	0.872572	0.700419
2513020848	1820001	1830000	0	0	0	0	0	0	0	0	0	0	0	0	0	0	0.136187	0	0	0	0	0	0	0	0	0.141744	0	0	0	0.223362	0.392973	0.349997	0.779518	0.652103	0.279191	0.440824	0.385331	0.872572	0.700543
2513020848	1825001	1835000	0	0	0	0	0	0	0	0	0	0	0	0	0	0	0.136187	0	0	0	0	0	0	0	0	0	0	0	0	0.234595	0.380686	0.318788	0.803154	0.634858	0.279191	0.440824	0.377739	0.872572	0.700419
2513020848	1830001	1840000	0	0	0	0.405467	0	0	0	0	0	0	0	0	0	0	0	0	0	0	0	0.132947	0.138598	0	0	0	0	0	0.121619	0.233581	0.385951	0.30469	0.822461	0.599503	0.279191	0.440824	0.377739	0.872572	0.700419
2513020848	1835001	1845000	0	0	0	0.403597	0	0	0	0	0	0	0	0	0	0	0	0	0	0	0	0.132947	0.138598	0	0	0	0	0	0.121884	0.234138	0.386492	0.30578	0.820981	0.605153	0.279191	0.440824	0.377739	0.872572	0.700419
2513020848	1840001	1850000	0	0.143998	0	0.403655	0	0	0	0	0	0	0	0	0	0	0	0	0	0	0	0.132947	0.138598	0	0	0	0	0	0.121884	0.236719	0.386543	0.302	0.816139	0.599132	0.279191	0.440824	0.377739	0.872572	0.700419
2513020848	1845001	1855000	0	0.143998	0	0	0	0	0	0	0	0	0	0	0	0	0	0	0	0	0	0	0	0	0	0	0	0	0	0.237845	0.388423	0.306281	0.812806	0.617932	0.279191	0.440824	0.377739	0.872572	0.700419
2513020848	1850001	1860000	0	0.143998	0	0.131803	0	0	0.138775	0	0	0.139188	0	0.145567	0	0	0	0	0.141806	0.140244	0.133486	0.134744	0	0.130703	0.138775	0	0	0	0	0.234579	0.389556	0.312334	0.808749	0.621198	0.279191	0.440824	0.377739	0.872572	0.700419
2513020848	1855001	1865000	0	0	0	0.130151	0	0	0.138775	0	0	0.139188	0	0.145567	0	0	0	0	0.141806	0.140244	0.133486	0.134744	0	0.130703	0.138775	0	0	0	0	0.231918	0.38995	0.317126	0.810887	0.627534	0.279191	0.440824	0.377739	0.872572	0.700419
2513020848	1860001	1870000	0	0	0	0.130151	0	0	0.138775	0	0	0.139188	0	0.145567	0	0	0	0	0.141806	0.140244	0.133486	0.134744	0	0.130067	0.138775	0	0	0	0	0.227657	0.391686	0.325888	0.804877	0.631206	0.279191	0.440824	0.377739	0.872572	0.700419
2513020848	1865001	1875000	0	0	0	0	0	0	0	0	0	0	0	0	0	0	0	0	0	0	0	0	0	0	0	0	0	0	0	0.236051	0.388488	0.309227	0.816099	0.623295	0.279191	0.440824	0.377739	0.872572	0.700419
2513020848	1870001	1880000	0	0	0	0	0	0	0	0	0	0	0	0	0	0	0	0	0	0	0	0	0	0	0	0	0	0	0	0.236051	0.388488	0.309227	0.816099	0.623295	0.279191	0.440824	0.377739	0.872572	0.700419
2513020848	1875001	1885000	0	0	0	0.131772	0	0	0	0	0	0	0	0	0	0.146004	0	0	0	0	0.136687	0	0	0	0	0	0	0	0.134343	0.2311	0.385099	0.313462	0.818206	0.617839	0.279191	0.440824	0.377739	0.872572	0.700419
2513020848	1880001	1890000	0	0	0	0.133899	0	0	0.146452	0	0	0	0	0	0	0.146004	0	0	0.139747	0	0.266445	0.130791	0.136577	0.258894	0	0	0	0	0.126053	0.235894	0.373225	0.329711	0.815915	0.622442	0.279191	0.440824	0.377739	0.872572	0.700419
2513020848	1885001	1895000	0	0	0	0.136403	0	0	0.146452	0	0	0	0	0	0	0.146004	0	0	0.139747	0	0.266445	0.130791	0.136577	0.259	0	0	0	0	0.124688	0.235886	0.376712	0.324836	0.815958	0.622652	0.279191	0.440824	0.377739	0.872572	0.700419
2513020848	1890001	1900000	0	0	0	0	0	0	0.146452	0	0	0	0	0	0	0	0	0	0.139747	0	0.13046	0.130791	0.136577	0.259	0	0	0	0	0	0.239662	0.380081	0.320524	0.814917	0.626276	0.279191	0.440824	0.377739	0.872572	0.700419
2513020848	1895001	1905000	0.148473	0.146411	0	0	0.142246	0.146004	0	0	0	0.141469	0	0	0.296115	0.292169	0.142536	0.141806	0	0.143542	0.13606	0.272503	0.144394	0.132761	0	0	0	0.130617	0.125209	0.22677	0.389185	0.321838	0.81207	0.63199	0.279191	0.440824	0.377739	0.872572	0.700419
2513020848	1900001	1910000	0.148473	0.146411	0.153405	0	0.278533	0.146004	0.160657	0	0	0.288354	0	0	0.296115	0.292169	0.142536	0.141806	0.142964	0.143542	0.408179	0.409404	0.144394	0.132412	0.14637	0	0	0.130617	0.124525	0.225482	0.383504	0.323467	0.801436	0.630568	0.279191	0.440824	0.377739	0.872572	0.700419
2513020848	1905001	1915000	0.148473	0.282456	0.153405	0	0.278533	0.146004	0.304072	0	0	0.288354	0	0	0.295306	0.292169	0.142536	0.279063	0.142964	0.143542	0.542897	0.408755	0.144394	0.263387	0.14637	0	0	0.125842	0.122777	0.228823	0.377942	0.332345	0.787241	0.634214	0.279191	0.440824	0.377739	0.872572	0.700419
2513020848	1910001	1920000	0	0.13732	0.153405	0	0.136754	0	0.304072	0	0	0.147432	0	0	0	0	0	0.137553	0.142964	0	0.406129	0.134045	0	0.131694	0.14637	0	0	0	0	0.247899	0.376566	0.306946	0.794732	0.616592	0.279191	0.440824	0.377739	0.872572	0.700419
2513020848	1915001	1925000	0	0.13732	0	0.13125	0	0	0.146206	0	0	0	0	0	0	0	0	0.137553	0	0	0.132136	0	0	0.131694	0	0	0	0	0	0.243318	0.386793	0.306012	0.810146	0.619162	0.279191	0.440824	0.377739	0.872572	0.700419
2513020848	1920001	1930000	0	0	0	0.130747	0	0	0	0	0	0	0	0	0	0	0	0	0	0	0	0	0	0	0	0	0	0	0	0.235471	0.389078	0.306677	0.814877	0.620963	0.279191	0.440824	0.377739	0.872572	0.700419
2513020848	1925001	1935000	0	0.136102	0	0.262499	0.135236	0	0	0	0	0	0	0.143132	0	0.1419	0.13972	0	0	0	0.133664	0.134494	0	0	0	0	0	0	0	0.228879	0.392082	0.308995	0.803614	0.622708	0.279191	0.440824	0.377739	0.872572	0.700419
2513020848	1930001	1940000	0	0.136102	0	0.135356	0.135236	0	0	0	0	0	0	0.143132	0	0.1419	0.13972	0	0	0	0.133664	0.134494	0	0	0	0	0	0	0	0.230409	0.391063	0.310972	0.806508	0.624561	0.279191	0.440824	0.377739	0.872572	0.700419
2513020848	1935001	1945000	0	0.136102	0	0.135356	0.135236	0	0	0	0	0	0	0.143132	0	0.1419	0.13972	0	0	0	0.133664	0.134763	0	0	0	0	0	0	0	0.231019	0.390767	0.310783	0.807583	0.624423	0.279191	0.440824	0.377739	0.872572	0.700419
2513020848	1940001	1950000	0.137671	0	0	0.135276	0.133101	0	0.139478	0	0	0	0	0	0	0	0	0	0	0	0	0	0	0	0	0	0	0	0	0.233424	0.386797	0.304965	0.812774	0.615003	0.279191	0.440824	0.377739	0.872572	0.700419
2513020848	1945001	1955000	0.137671	0	0	0.134212	0.133101	0	0.139478	0	0	0	0	0	0	0	0	0	0	0.139856	0.140132	0	0	0.267616	0	0	0	0	0	0.229938	0.379378	0.312133	0.808893	0.614393	0.279191	0.440824	0.377739	0.872572	0.700419
2513020848	1950001	1960000	0.137671	0	0	0.134212	0.133101	0	0.139478	0	0	0	0	0	0	0	0	0	0	0.139856	0.140132	0	0	0.268387	0	0	0	0	0	0.230393	0.380059	0.311907	0.809446	0.615065	0.279191	0.440824	0.377739	0.872572	0.700419
2513020848	1955001	1965000	0	0	0	0.285007	0	0	0	0	0	0	0	0	0	0	0	0	0	0.139856	0.140132	0	0	0.268387	0	0	0	0	0	0.232743	0.383704	0.311955	0.811469	0.621098	0.279191	0.440824	0.377739	0.872572	0.700419
2513020848	1960001	1970000	0	0	0	0.285007	0	0	0	0	0	0	0	0	0	0	0	0	0	0	0	0	0	0	0	0	0	0	0	0.234946	0.389634	0.304342	0.813751	0.618817	0.279191	0.440824	0.377739	0.872572	0.700419
2513020848	1965001	1975000	0	0	0.135601	0.285007	0	0	0	0	0	0	0	0	0	0.140328	0	0	0	0	0	0	0.139032	0.133119	0	0	0	0	0	0.233228	0.385219	0.306498	0.806178	0.616788	0.279191	0.440824	0.377739	0.872572	0.700419
2513020848	1970001	1980000	0	0	0.135601	0.135136	0.13486	0	0	0	0	0.140555	0.146329	0	0.143166	0.140328	0.140757	0.138547	0.14231	0	0.269333	0.133432	0.279932	0.133119	0.141962	0	0	0	0	0.240954	0.383657	0.318417	0.79398	0.644683	0.279191	0.440824	0.377739	0.872572	0.700419
2513020848	1975001	1985000	0	0	0.135601	0.135136	0.136017	0	0	0	0	0.140555	0.146329	0	0.143166	0.140328	0.140757	0.138547	0.14231	0	0.269333	0.133432	0.279932	0.133119	0.141962	0	0	0	0	0.240617	0.383963	0.317778	0.795431	0.643297	0.279191	0.440824	0.377739	0.872572	0.700419
2513020848	1980001	1990000	0	0	0	0.135136	0.137274	0	0	0	0	0.140555	0.146329	0	0.143166	0	0.140757	0.138547	0.14231	0	0.269333	0.13399	0.140932	0	0.141962	0	0	0	0	0.248626	0.391054	0.317952	0.793117	0.664077	0.279191	0.440824	0.377739	0.872572	0.708826
2513020848	1985001	1995000	0	0	0.134287	0.134958	0.133292	0	0	0	0	0	0	0	0	0.141993	0.140961	0	0	0	0.133592	0.134212	0	0.133862	0	0	0	0.127344	0	0.208552	0.363257	0.344418	0.774349	0.610856	0.279191	0.440824	0.382758	0.872572	0.700419
2513020848	1990001	2000000	0	0	0.269995	0.134958	0.133292	0	0	0	0	0.140641	0	0	0	0.141993	0.140961	0	0	0	0.133592	0.267184	0	0.267471	0	0	0	0.127344	0	0.220072	0.370844	0.323531	0.787071	0.607242	0.279191	0.440824	0.377739	0.872572	0.700419
2513020848	1995001	2005000	0.140584	0.135621	0.269995	0.134958	0.133292	0	0	0	0	0.140641	0	0	0	0.141993	0.140961	0	0.145103	0	0.269218	0.402636	0	0.267471	0.141713	0.146004	0	0.127344	0.124463	0.227482	0.377856	0.319929	0.800229	0.603896	0.279191	0.440824	0.377739	0.872572	0.700419
2513020848	2000001	2010000	0.140584	0.135621	0.138323	0	0	0	0	0	0	0.140641	0	0	0	0	0	0	0.145103	0	0.269372	0.398995	0	0.266306	0.141713	0.146004	0	0	0.124853	0.234324	0.38293	0.314517	0.811168	0.612523	0.279191	0.440824	0.377739	0.872572	0.700419
2513020848	2005001	2015000	0.140584	0.135621	0	0	0	0	0	0	0	0	0	0	0	0	0	0	0.145103	0.139505	0.269372	0.26787	0	0.132711	0.141713	0.146004	0	0	0.124853	0.229209	0.381463	0.320244	0.810985	0.614385	0.279191	0.440824	0.377739	0.872572	0.700419
2513020848	2010001	2020000	0	0	0	0	0	0	0	0	0	0	0	0	0	0	0	0	0	0.139505	0.133736	0.132561	0	0.132711	0	0	0	0	0	0.225084	0.379563	0.322172	0.810345	0.628152	0.279191	0.440824	0.377739	0.872572	0.700419
2513020848	2015001	2025000	0	0	0	0	0	0	0	0	0	0	0	0	0	0	0	0	0	0.139505	0	0	0	0	0	0	0	0	0	0.226453	0.386063	0.312656	0.812836	0.625949	0.279191	0.440824	0.377739	0.872572	0.700419
2513020848	2020001	2030000	0	0	0	0	0	0	0	0	0	0	0	0	0	0	0	0	0	0	0	0	0	0	0	0	0	0	0	0.236051	0.388488	0.309227	0.816099	0.623295	0.279191	0.440824	0.377739	0.872572	0.700419
2513020848	2025001	2035000	0	0	0	0	0	0	0	0	0	0	0	0	0	0	0	0	0	0	0	0	0	0	0	0	0	0	0	0.236051	0.388488	0.309227	0.816099	0.623295	0.279191	0.440824	0.377739	0.872572	0.700419
2513020848	2030001	2040000	0	0	0	0	0	0	0	0	0	0	0	0	0.147432	0	0	0	0	0	0	0	0	0	0	0	0	0	0	0.237661	0.392697	0.307619	0.819776	0.630218	0.279191	0.440824	0.377739	0.872572	0.700419
2513020848	2035001	2045000	0	0	0	0	0.134899	0	0.140641	0	0	0	0	0	0.147432	0	0	0	0	0	0	0	0	0	0.14047	0.148707	0	0	0	0.238358	0.393159	0.306451	0.820861	0.62987	0.279191	0.440824	0.377739	0.872572	0.700419
2513020848	2040001	2050000	0.152442	0	0	0	0.134899	0	0.140641	0	0	0	0	0	0.147432	0	0	0	0	0	0	0.137506	0	0.137766	0.14047	0.148707	0	0	0	0.234671	0.390091	0.306709	0.817739	0.625301	0.279191	0.440824	0.377739	0.872572	0.700419
2513020848	2045001	2055000	0.152442	0	0	0	0.134899	0	0.140641	0	0	0	0	0	0	0	0	0	0	0	0	0.137506	0	0.137766	0.14047	0.148707	0	0	0	0.23279	0.384844	0.308827	0.813051	0.616675	0.279191	0.440824	0.377739	0.872572	0.700419
2513020848	2050001	2060000	0.152442	0.143132	0	0	0	0	0	0	0	0	0	0	0	0	0	0.134919	0.138151	0	0.133327	0.265758	0.136403	0.26058	0	0	0	0	0	0.236384	0.383357	0.317017	0.80339	0.61827	0.279191	0.440824	0.377739	0.872572	0.700419
2513020848	2055001	2065000	0	0.143132	0	0	0	0	0	0	0	0	0	0	0	0	0	0.134919	0.138151	0	0.130026	0.129421	0.136403	0.129767	0	0	0	0	0	0.240859	0.386708	0.317219	0.806281	0.623731	0.279191	0.440824	0.377739	0.872572	0.700419
2513020848	2060001	2070000	0	0.143132	0	0	0	0	0	0	0	0	0	0	0	0	0	0.133345	0.138151	0.140786	0.264113	0.262319	0.136403	0.129767	0	0	0	0	0	0.231822	0.38153	0.328623	0.796779	0.628132	0.279191	0.440824	0.377739	0.872572	0.700419
2513020848	2065001	2075000	0	0	0	0	0	0	0	0	0	0	0	0	0	0	0	0	0	0.140786	0.133362	0.131493	0	0	0	0	0	0	0	0.226957	0.384778	0.315751	0.811774	0.626879	0.279191	0.440824	0.377739	0.872572	0.700419
2513020848	2070001	2080000	0	0	0	0	0	0	0	0	0	0	0	0	0	0	0	0	0	0.278638	0.133362	0.131493	0.137343	0.133972	0	0	0	0	0	0.226401	0.380979	0.320286	0.810936	0.627646	0.279191	0.440824	0.377739	0.872572	0.700419
2513020848	2075001	2085000	0	0	0	0	0	0	0	0	0	0	0	0	0	0	0	0	0	0.138006	0	0	0.137343	0.133972	0	0	0	0	0	0.233297	0.382509	0.316745	0.814082	0.625135	0.279191	0.440824	0.377739	0.872572	0.700419
2513020848	2080001	2090000	0	0	0	0	0	0	0	0	0	0	0	0	0	0	0	0	0	0.138006	0	0	0.137343	0.133972	0	0	0	0	0	0.232475	0.380712	0.319064	0.813437	0.625692	0.279191	0.440824	0.377739	0.872572	0.700419
2513020848	2085001	2095000	0	0	0	0	0	0	0	0	0	0	0	0	0	0	0	0	0	0	0	0	0	0	0	0	0	0	0	0.236051	0.388488	0.309227	0.816099	0.623295	0.279191	0.440824	0.377739	0.872572	0.700419
2513020848	2090001	2100000	0	0	0	0	0	0	0	0	0	0	0	0	0	0	0	0	0	0	0	0	0	0	0	0	0	0	0	0.236051	0.388488	0.312982	0.816733	0.621458	0.279191	0.440824	0.377739	0.872572	0.700419
2513020848	2095001	2105000	0	0	0	0	0	0	0	0	0	0	0	0	0	0	0	0	0	0	0	0	0	0	0	0	0	0	0	0.236051	0.388488	0.313164	0.816763	0.621368	0.279191	0.440824	0.377739	0.872572	0.700419
2513020848	2100001	2110000	0.147214	0.28857	0.276845	0.151034	0.136403	0.147432	0	0	0	0	0	0	0	0	0	0	0	0	0	0	0	0	0	0	0	0.129316	0.129057	0.237151	0.386035	0.301231	0.811398	0.588587	0.279191	0.440824	0.377739	0.872572	0.700419
2513020848	2105001	2115000	0.147214	0.28857	0.276845	0.151034	0.136403	0.147432	0	0	0	0	0	0	0	0	0	0	0	0	0	0	0	0	0	0	0	0.131803	0.129057	0.237091	0.386163	0.29842	0.811056	0.591947	0.279191	0.440824	0.377739	0.872572	0.700419
2513020848	2110001	2120000	0.147214	0.28857	0.276845	0.151034	0.134532	0.147432	0	0	0	0	0	0.142536	0	0	0	0	0	0	0.132024	0.131866	0	0.138877	0	0	0	0.131803	0.129057	0.236417	0.389278	0.301584	0.812089	0.598875	0.279191	0.440824	0.377739	0.872572	0.700419
2513020848	2115001	2125000	0	0	0	0	0	0	0	0	0	0	0	0.142536	0	0	0	0	0	0	0.131085	0.131554	0	0.263606	0	0	0	0	0	0.236576	0.390347	0.31355	0.817061	0.628025	0.279191	0.440824	0.377739	0.872572	0.700419
2513020848	2120001	2130000	0	0	0	0	0	0	0	0	0	0	0	0.142536	0	0	0	0	0	0	0.131085	0.262499	0	0.396748	0	0	0	0.125663	0	0.235446	0.387615	0.319569	0.820803	0.626074	0.279191	0.440824	0.377739	0.872572	0.700419
2513020848	2125001	2135000	0	0	0	0	0	0	0	0	0	0	0	0	0	0	0	0	0	0	0	0.130403	0	0.265455	0	0	0	0.125663	0	0.236238	0.384331	0.315286	0.819513	0.621021	0.279191	0.440824	0.377739	0.872572	0.700419
2513020848	2130001	2140000	0	0	0	0	0	0	0	0	0	0	0	0	0	0	0	0	0	0	0	0.129593	0	0.133222	0	0	0	0.125663	0	0.234876	0.385623	0.314447	0.819628	0.620901	0.279191	0.440824	0.377739	0.872572	0.700419
2513020848	2135001	2145000	0	0	0	0	0	0	0	0	0	0	0	0	0	0	0	0	0	0.13972	0.130403	0.131447	0	0.129835	0	0	0	0	0	0.230801	0.384307	0.31922	0.814874	0.623849	0.279191	0.440824	0.377739	0.872572	0.700419
2513020848	2140001	2150000	0	0	0	0	0	0	0	0	0	0	0	0	0	0	0	0	0	0.13972	0.130403	0.131447	0	0.129835	0	0	0	0	0	0.230275	0.383886	0.320245	0.814729	0.623894	0.279191	0.440824	0.377739	0.872572	0.700419
2513020848	2145001	2155000	0	0	0	0	0	0	0	0	0	0	0	0	0	0	0	0	0	0.13972	0.130403	0.131447	0	0.129835	0	0	0	0	0	0.231866	0.385158	0.317157	0.815155	0.623751	0.279191	0.440824	0.377739	0.872572	0.700419
2513020848	2150001	2160000	0	0	0	0	0	0	0	0	0	0	0	0	0	0	0	0	0	0	0	0	0	0	0	0	0	0	0	0.236051	0.388488	0.309227	0.816099	0.623295	0.279191	0.440824	0.377739	0.872572	0.700419
2513020848	2155001	2165000	0	0	0	0	0	0	0	0	0	0	0	0	0	0	0	0	0	0	0	0	0	0	0	0	0	0	0	0.236051	0.388488	0.309227	0.816099	0.623295	0.279191	0.440824	0.377739	0.872572	0.700419
2513020848	2160001	2170000	0	0	0	0	0	0	0	0	0	0	0	0	0	0	0	0	0	0	0	0	0	0	0	0	0	0	0	0.236051	0.388488	0.309227	0.816099	0.623295	0.279191	0.440824	0.377739	0.872572	0.700419
2513020848	2165001	2175000	0.625119	0.596554	0.591147	0.609299	0.591687	0.600755	0.627173	0.630831	0.598722	0.599528	0.617952	0.628676	0.61665	0.763388	0.599528	0.590434	0.626876	0.605226	0.582896	0.718055	0.606782	0.712843	0.757084	0.62898	0.647126	0.557382	0.537072	0.195377	0.558403	0.283149	0.161969	0.325676	0.279191	0.586076	0.377739	0.872572	0.700419
2513020848	2170001	2180000	0.625119	0.596554	0.591147	0.609532	0.591687	0.750686	0.627173	0.630831	0.598722	0.599528	0.617952	0.628676	0.61665	0.763388	0.599528	0.590434	0.626876	0.605226	0.582896	0.718229	0.606782	0.712843	0.757084	0.62898	0.647126	0.557382	0.537072	0.785783	0.821332	0.337086	0.287873	0.311129	0.803365	0.834704	0.378281	0.872572	0.700419
2513020848	2175001	2185000	0.625119	0.596554	0.591147	0.609532	0.739609	0.900515	0.627173	0.630831	0.598722	0.599528	0.617952	0.628676	0.61665	0.763388	0.599528	0.590434	0.626876	0.605226	0.582896	0.718229	0.606782	0.712843	0.757084	0.62898	0.647126	0.557382	0.537072	0.875219	0.745573	0.410933	0.156104	0.634412	0.886411	0.764261	0.437837	0.872572	0.700419
2513020848	2180001	2190000	0	0	0	0	0.130234	0.269487	0	0	0	0	0	0	0	0	0	0	0	0	0	0	0	0	0	0	0	0	0	0.240749	0.378208	0.301201	0.818342	0.604605	0.279191	0.440824	0.377739	0.872572	0.700419
2513020848	2185001	2195000	0	0	0	0	0.130234	0.131585	0	0	0	0	0	0	0	0	0	0	0	0	0	0	0	0	0	0	0	0	0	0.236236	0.386761	0.310227	0.817616	0.617923	0.279191	0.440824	0.377739	0.872572	0.700419
2513020848	2190001	2200000	0.331185	0.313438	0.306686	0.465675	0.31256	0.311985	0.484769	0.318846	0.301212	0.314186	0.325539	0.335089	0.334078	0.31495	0.30644	0.468839	0.332366	0.316205	0.291607	0.289527	0.320593	0.29417	0.314036	0.335603	0.342623	0.292494	0.426169	0.240004	0.393573	0.305634	0.819708	0.619617	0.279191	0.440824	0.377739	0.872572	0.700419
2513020848	2195001	2205000	0.605446	0.581487	0.552704	0.713006	0.572392	0.779607	0.806526	0.583693	0.556542	0.591147	0.607233	0.624542	0.613867	0.59079	0.766101	0.781038	0.605889	0.590434	0.555816	0.550873	0.585315	0.5529	0.585975	0.621173	0.632729	0.541425	0.709967	0.242011	0.391275	0.305224	0.814401	0.626295	0.279191	0.440824	0.377739	0.872572	0.700419
2513020848	2200001	2210000	0.605446	0.581487	0.552704	0.776124	0.543732	0.779607	0.806526	0.583693	0.556542	0.591147	0.607233	0.624542	0.613867	0.59079	0.766101	0.781038	0.605889	0.564792	0.555816	0.531789	0.585315	0.530709	0.585975	0.621173	0.632729	0.516744	0.657158	0.244248	0.394261	0.300289	0.80759	0.629934	0.279191	0.440824	0.377739	0.872572	0.700419
2513020848	2205001	2215000	0.286467	0.276696	0.261436	0.269838	0.271242	0.404522	0.281225	0.276401	0.264956	0.282938	0.289527	0.297605	0.290512	0.421666	0.418116	0.274228	0.428792	0.281283	0.535087	0.397434	0.276845	0.264466	0.27944	0.295217	0.300172	0.257936	0.25021	0.228728	0.383014	0.320592	0.796878	0.640521	0.279191	0.440824	0.377739	0.872572	0.700419
2513020848	2210001	2220000	0	0	0	0	0	0	0	0	0	0	0	0	0	0.136955	0	0	0.139032	0	0.2669	0.131524	0	0	0	0	0	0	0	0.231052	0.385289	0.317276	0.807843	0.629903	0.279191	0.440824	0.377739	0.872572	0.700419
2513020848	2215001	2225000	0	0	0	0	0	0	0	0	0	0	0	0	0	0.136955	0	0	0.139032	0	0.266445	0.130631	0	0	0	0	0	0	0	0.231595	0.385641	0.316978	0.808691	0.629585	0.279191	0.440824	0.377739	0.872572	0.700419
2513020848	2220001	2230000	0	0	0	0	0	0	0	0	0	0	0	0	0	0	0.140844	0	0	0	0	0	0	0	0	0	0	0	0	0.235625	0.386266	0.311832	0.812526	0.626509	0.279191	0.440824	0.377739	0.872572	0.700419
2513020848	2225001	2235000	0	0	0.134082	0	0.135017	0	0	0	0	0	0	0	0	0	0.140844	0	0	0	0.133646	0.132185	0	0	0	0	0	0	0	0.230624	0.382057	0.312345	0.802422	0.623294	0.279191	0.440824	0.377739	0.872572	0.700419
2513020848	2230001	2240000	0	0	0.134082	0	0.135017	0	0	0	0	0	0	0	0	0	0.140844	0.138648	0	0	0.134306	0.132185	0	0.132611	0	0	0	0	0	0.235099	0.383962	0.316912	0.798704	0.625685	0.279191	0.440824	0.377739	0.872572	0.700419
2513020848	2235001	2245000	0	0	0.134082	0	0.135017	0	0	0	0	0	0	0	0	0	0	0.138648	0	0	0.13338	0.132185	0	0.132611	0	0	0	0	0	0.235817	0.387738	0.31281	0.807009	0.621731	0.279191	0.440824	0.377739	0.872572	0.700419
2513020848	2240001	2250000	0	0	0	0	0	0	0	0	0	0	0	0	0	0	0	0.138877	0	0	0	0	0	0.132611	0	0	0	0	0	0.238201	0.389381	0.312013	0.814212	0.624861	0.279191	0.440824	0.377739	0.872572	0.700419
2513020848	2245001	2255000	0	0	0	0	0	0	0	0	0	0	0	0	0	0	0	0	0	0	0	0	0	0	0	0	0	0	0	0.236051	0.388488	0.309227	0.816099	0.623295	0.279191	0.440824	0.377739	0.872572	0.700419
2513020848	2250001	2260000	0	0	0	0	0	0	0	0	0	0	0	0	0	0	0	0	0	0	0	0	0	0	0	0	0	0	0	0.236051	0.388488	0.309227	0.816099	0.623295	0.279191	0.440824	0.377739	0.872572	0.700419
2513020848	2255001	2265000	0	0	0	0.286331	0.141168	0	0	0	0.140049	0	0	0	0	0.141962	0	0	0	0	0.143404	0	0	0.135276	0	0.153843	0	0.13623	0.13004	0.231427	0.38691	0.310053	0.821195	0.614326	0.279191	0.440824	0.377739	0.872572	0.700419
2513020848	2260001	2270000	0	0.133844	0.264564	0.567848	0.27606	0.134686	0	0.137228	0.260552	0.277397	0.427804	0	0.140903	0.415268	0.136665	0.273198	0.285729	0.139532	0.532543	0.131235	0	0.393976	0.273242	0.293658	0.145372	0.269759	0.13004	0.231322	0.380716	0.311257	0.803531	0.626197	0.279191	0.440824	0.377739	0.872572	0.700419
2513020848	2265001	2275000	0	0.133844	0.264564	0.562107	0.27606	0.134686	0	0.137228	0.260552	0.276995	0.427804	0	0.281168	0.415944	0.136665	0.273198	0.423953	0.139532	0.674496	0.262469	0	0.524758	0.410597	0.293658	0.145372	0.269759	0.13004	0.234901	0.382317	0.316489	0.806878	0.635044	0.279191	0.440824	0.377739	0.872572	0.700419
2513020848	2270001	2280000	0	0.133844	0.264564	0.269372	0.13157	0.134686	0	0.137228	0.130067	0.276995	0.427804	0	0.281168	0.274365	0.136665	0.273198	0.423953	0.139532	0.532543	0.262469	0	0.39198	0.410597	0.141868	0.145372	0.133664	0	0.238317	0.384098	0.315029	0.804506	0.639677	0.279191	0.440824	0.377739	0.872572	0.700419
2513020848	2275001	2285000	0	0	0	0	0	0	0	0	0	0	0	0	0.140272	0	0	0	0.139693	0	0.145027	0.131462	0	0.130067	0.136978	0	0	0	0	0.238641	0.389045	0.313878	0.817525	0.631224	0.279191	0.440824	0.377739	0.872572	0.700419
2513020848	2280001	2290000	0	0	0	0	0	0	0	0	0	0	0	0	0	0	0	0.136187	0	0	0.132363	0	0	0.130981	0.137274	0	0	0	0	0.239577	0.387917	0.31444	0.814216	0.624952	0.279191	0.440824	0.377739	0.872572	0.700419
2513020848	2285001	2295000	0	0	0	0	0	0	0	0	0	0	0	0	0	0	0	0.136187	0	0	0.132363	0	0	0.130981	0.137274	0	0	0	0	0.241823	0.387568	0.317756	0.812997	0.62599	0.279191	0.440824	0.377739	0.872572	0.700419
2513020848	2290001	2300000	0.144431	0.26798	0.12993	0.389627	0.136316	0.133415	0.137909	0	0	0.142375	0	0	0.145843	0	0.136145	0.270632	0.138699	0.13924	0.264956	0.132363	0.137274	0.263078	0.275915	0.145764	0.149781	0.130574	0.126752	0.245986	0.391459	0.315087	0.80544	0.602385	0.279191	0.440824	0.377739	0.872572	0.700419
2513020848	2295001	2305000	0.144431	0.26798	0.12993	0.389627	0.136316	0.133415	0.137909	0	0	0.142375	0	0	0.145843	0	0.136145	0.135316	0.138699	0.13924	0.132594	0.132363	0.137274	0.131803	0.138648	0.145764	0.149781	0.130574	0.127333	0.24016	0.392386	0.306579	0.80874	0.599648	0.279191	0.440824	0.377739	0.872572	0.700419
2513020848	2300001	2310000	0.140356	0.26798	0.12993	0.389913	0.132445	0.133415	0.137909	0	0	0.142375	0	0	0.145843	0	0.136145	0.135316	0.138699	0.13924	0.132594	0.132363	0.137274	0.130966	0.138648	0.145764	0.148333	0.130574	0.127333	0.238995	0.391227	0.307426	0.810975	0.606707	0.279191	0.440824	0.377739	0.872572	0.700419
2513020848	2305001	2315000	0	0	0	0	0	0	0	0	0	0	0	0	0	0	0	0	0	0	0	0	0	0	0	0	0	0	0	0.236051	0.388488	0.309227	0.816099	0.623295	0.279191	0.440824	0.377739	0.872572	0.700419
2513020848	2310001	2320000	0	0	0.269995	0.137577	0.272375	0	0.283181	0	0	0.143473	0.141744	0.148707	0	0	0.143335	0.135216	0	0.149681	0.138151	0.138699	0	0.261698	0.278323	0	0	0	0	0.234144	0.381239	0.301812	0.797929	0.622283	0.279191	0.440824	0.377739	0.872572	0.700419
2513020848	2315001	2325000	0.137483	0	0.269995	0.271532	0.402748	0	0.419487	0	0.129277	0.426169	0.289978	0.289978	0	0	0.143335	0.135216	0	0.149681	0.138151	0.138699	0	0.266936	0.278323	0.14156	0	0.250685	0.246299	0.228793	0.387337	0.270509	0.829699	0.561616	0.279191	0.440824	0.377739	0.872572	0.700419
2513020848	2320001	2330000	0.141228	0	0.275247	0.281747	0.415268	0	0.424772	0	0.129277	0.565271	0.289978	0.289978	0	0	0.281747	0.272892	0.144913	0.149681	0.270875	0.138699	0	0.261698	0.413584	0.42722	0	0.500911	0.488002	0.253269	0.410593	0.393197	0.817826	0.430455	0.281846	0.448858	0.424653	0.872572	0.700419
2513020848	2325001	2335000	0.141228	0	0	0.141591	0.140991	0	0.141438	0	0.129277	0.421838	0.149042	0.141962	0	0	0.138775	0.13779	0.144913	0	0.133153	0	0	0	0.137861	0.42722	0	0.500911	0.487943	0.426321	0.698646	0.982261	0.111977	0.0792417	0.450595	0.720517	0.983089	0.872572	0.700419
2513020848	2330001	2340000	0	0	0	0	0	0	0	0	0	0.140613	0	0	0	0	0.138775	0.13779	0.144913	0	0.133153	0	0	0	0.137861	0.285861	0	0.250456	0.243366	0.384765	0.483924	0.831327	0.667745	0.350502	0.408856	0.512441	0.842676	0.872572	0.700419
2513020848	2335001	2345000	0	0	0	0.133808	0	0	0	0	0	0	0	0	0	0	0	0.139774	0.140527	0	0	0	0	0.13486	0.142375	0	0	0	0	0.297788	0.397708	0.369332	0.754461	0.635849	0.324264	0.440824	0.401066	0.872572	0.700419
2513020848	2340001	2350000	0	0	0	0.133808	0	0	0	0	0	0	0	0	0	0	0	0.139774	0.140527	0	0	0	0	0.13486	0.142375	0	0	0	0	0.245122	0.389661	0.318218	0.806928	0.625072	0.279191	0.440824	0.377739	0.872572	0.700419
2513020848	2345001	2355000	0	0	0	0.133808	0	0	0	0	0	0	0	0	0	0	0	0.139774	0.140527	0	0	0	0	0.13486	0.142375	0	0	0	0	0.24023	0.389015	0.313377	0.811884	0.624107	0.279191	0.440824	0.377739	0.872572	0.700419
2513020848	2350001	2360000	0	0	0	0	0	0	0	0	0	0	0	0	0	0	0	0	0	0	0	0	0	0	0	0	0	0	0	0.236051	0.388488	0.309227	0.816099	0.623295	0.279191	0.440824	0.377739	0.872572	0.700419
2513020848	2355001	2365000	0.143998	0	0	0	0	0	0	0	0	0.142025	0	0	0.146452	0	0	0	0	0	0.135683	0	0.146871	0.136038	0	0	0	0	0	0.238542	0.389575	0.314838	0.815706	0.624771	0.279191	0.440824	0.377739	0.872572	0.700419
2513020848	2360001	2370000	0.143998	0	0	0	0	0	0	0	0	0.142025	0	0	0.146452	0	0	0	0	0	0.135683	0	0.146871	0.136038	0	0	0	0	0	0.238822	0.389698	0.315467	0.815662	0.624926	0.279191	0.440824	0.377739	0.872572	0.700419
2513020848	2365001	2375000	1.73896	0.144285	0.142831	0.865929	1.14478	1.14291	1.35077	0	1.12218	0.973221	1.85897	1.29439	1.27936	1.52624	1.77295	1.08448	1.8239	2.22784	1.84524	2.35713	1.51913	1.56723	2.05164	1.00098	0.865929	1.0168	0	0.142482	0.371947	0.521329	0.701184	0.76132	0.279191	0.440824	0.543631	0.872572	0.79477
2513020848	2370001	2380000	1.60037	0.144285	0.141931	0.865929	1.14478	1.14291	1.35077	0	1.12218	0.834034	1.85897	1.29439	1.13371	1.52624	1.7778	1.08797	5.88789	2.65059	1.71202	2.87262	1.38078	1.96339	2.32939	1.00098	0.865929	1.0168	0	0.129696	0.342255	0.855533	0.534529	0.867126	0.279191	0.440824	0.864263	0.872572	0.883487
2513020848	2375001	2385000	1.58754	0.143751	0.414017	0.860013	1.27993	1.14081	1.34803	0	1.12195	0.834034	1.85897	1.29534	1.13371	1.67151	2.05131	1.09174	11.9207	2.92404	1.7157	3.66051	1.38078	1.96561	2.74046	1.00098	0.865929	1.01857	0	0.314294	0.28018	0.146013	0.246357	0.788189	0.339144	0.440824	0.377739	0.872572	0.816363
2513020848	2380001	2390000	0	0	0.273023	0.270552	0.131772	0	0	0	0	0	0	0	0	0.144069	0.276597	0	11.0949	0.696332	0	1.30574	0.141079	0.658469	0.959479	0	0	0	0	0.940144	0.15319	0.207101	0.520431	0.897669	0.947321	0.440824	0.377739	0.872572	0.909148
2513020848	2385001	2395000	0	0.13305	0.414017	0.270552	0.264049	0	0.136424	0	0	0.145333	0	0.151583	0	0.144069	0.41725	0	8.30295	0.41725	0.13379	0.923726	0.141079	0.264531	1.09262	0	0	0	0	0.943291	0.213016	0.162398	0.47006	0.929171	0.949686	0.440824	0.377739	0.872572	0.937058
2513020848	2390001	2400000	0	0.144069	0.140844	0.426548	0.141109	0	0.145764	0	0	0.145333	0	0.151362	0	0	0.144249	0	5.16466	0.147214	0.141318	0.134362	0.141079	0.273866	0.683216	0	0	0	0	0.80377	0.325975	0.248813	0.508408	0.933247	0.820343	0.440824	0.377739	0.872572	0.938779
2513020848	2395001	2405000	0	0.144069	0.134938	0.139856	0.141109	0	0.145764	0	0	0.145333	0	0.151362	0	0	0.144249	0	8.65429	0.147214	0.141318	0.136621	0	0.139425	0.409864	0	0	0	0	0.780101	0.350423	0.300927	0.576415	0.931188	0.798931	0.440824	0.377739	0.872572	0.938296
2513020848	2400001	2410000	0.430833	0	0	0.139856	0	0	0	0	0	0.139188	0	0	0	0.83497	0.416096	0	11.9997	0.84096	0.527338	0.802305	0	0.782078	0.545871	0	0	0	0	0.972655	0.0721329	0.210461	0.45173	0.848883	0.975941	0.440824	0.377739	0.872572	0.868625
2513020848	2405001	2415000	0.430833	0	0	0.150086	0	0	0	0	0	0.139188	0	0	0	0.83497	0.416096	0	10.1956	0.84096	0.655351	0.802305	0	0.782078	0.545264	0	0	0	0	0.990848	0.165143	0.144919	0.446428	0.793275	0.990848	0.440824	0.377739	0.872572	0.819488
2513020848	2410001	2420000	0.430833	0	0	0.150086	0	0	0	0	0	0.139188	0	0	0	0.83497	0.416096	0	5.73187	0.84096	0.791007	0.802305	0	0.782078	0.545092	0	0	0	0	0.230195	0.24615	0.787573	0.371133	0.903393	0.279191	0.440824	0.799689	0.872572	0.914166
2513020848	2415001	2425000	0	0	0	0.150086	0	0	0	0	0	0	0	0	0	0	0	0	1.12722	0	0.268461	0	0	0	0	0	0	0	0	0.249017	0.386636	0.346745	0.776784	0.646963	0.279191	0.440824	0.383194	0.872572	0.700419
2513020848	2420001	2430000	0	0	0	0	0	0	0	0	0	0	0	0	0	0	0	0	0	0	0.139109	0	0	0	0	0	0	0	0	0.236443	0.387276	0.31176	0.814443	0.624683	0.279191	0.440824	0.377739	0.872572	0.700419
2513020848	2425001	2435000	0	0	0	0.136643	0.13671	0	0	0	0	0	0	0	0	0	0	0	0.146914	0	0	0	0	0	0	0	0	0	0	0.235702	0.389044	0.307033	0.811918	0.62204	0.279191	0.440824	0.377739	0.872572	0.700419
2513020848	2430001	2440000	0	0	0	0.139032	0.13671	0	0	0	0	0	0	0	0	0	0	0	0.146914	0	0	0	0	0	0	0	0	0	0	0.235725	0.389	0.307202	0.812288	0.622125	0.279191	0.440824	0.377739	0.872572	0.700419
2513020848	2435001	2445000	0	0	0	0.140699	0.274319	0	0	0	0	0	0	0	0	0	0	0	0.146914	0	0	0	0	0	0	0	0	0	0	0.2351	0.389049	0.30542	0.811302	0.621114	0.279191	0.440824	0.377739	0.872572	0.700419
2513020848	2440001	2450000	0	0	0	0	0.137624	0	0	0	0	0	0	0	0	0	0	0	0	0	0	0	0	0	0	0	0	0	0	0.235357	0.388488	0.30736	0.815327	0.62226	0.279191	0.440824	0.377739	0.872572	0.700419
2513020848	2445001	2455000	0	0	0	0	0.137624	0	0	0	0	0	0	0	0	0	0	0	0	0	0	0	0	0	0	0	0	0	0	0.235387	0.388488	0.30744	0.815361	0.622304	0.279191	0.440824	0.377739	0.872572	0.700419
2513020848	2450001	2460000	0	0	0	0	0	0	0	0	0	0	0	0	0	0	0	0	0	0	0	0	0	0	0	0	0	0	0	0.236051	0.388488	0.309227	0.816099	0.623295	0.279191	0.440824	0.377739	0.872572	0.700419
2513020848	2455001	2465000	0	0	0	0	0	0	0	0	0	0	0	0	0	0	0	0	0	0	0	0	0	0	0	0	0	0	0	0.236051	0.388488	0.309227	0.816099	0.623295	0.279191	0.440824	0.377739	0.872572	0.700419
2513020848	2460001	2470000	0	0	0	0	0	0	0	0	0	0	0	0	0	0	0	0	0	0	0	0	0	0	0	0	0	0	0	0.236051	0.388488	0.309227	0.816099	0.623295	0.279191	0.440824	0.377739	0.872572	0.700419
2513020848	2465001	2475000	0	0.139398	0	0.139372	0.137274	0	0	0	0	0	0	0	0	0	0	0	0	0	0	0	0	0	0.142569	0	0	0	0	0.238271	0.387943	0.303556	0.81237	0.614163	0.279191	0.440824	0.377739	0.872572	0.700419
2513020848	2470001	2480000	0	0.139398	0	0.139372	0.137274	0	0	0	0	0	0	0	0	0	0	0	0	0	0	0	0	0	0.142569	0	0	0	0	0.23814	0.387974	0.303884	0.812589	0.614695	0.279191	0.440824	0.377739	0.872572	0.700419
2513020848	2475001	2485000	0	0.139398	0	0.139372	0.137274	0	0	0	0	0	0	0	0	0	0	0	0	0	0	0	0	0	0.142569	0	0	0	0	0.237867	0.388039	0.304572	0.813047	0.615809	0.279191	0.440824	0.377739	0.872572	0.700419
2513020848	2480001	2490000	0	0	0	0	0	0	0	0	0	0	0	0	0	0	0	0.13649	0	0.139829	0.131882	0.132314	0	0.132009	0	0	0	0	0	0.232025	0.386858	0.317315	0.812081	0.627337	0.279191	0.440824	0.377739	0.872572	0.700419
2513020848	2485001	2495000	0	0	0	0	0	0	0	0	0	0	0	0	0	0	0	0.13649	0	0.139829	0.131882	0.132314	0	0.132009	0	0	0	0	0	0.230962	0.386428	0.319504	0.810977	0.628418	0.279191	0.440824	0.377739	0.872572	0.700419
2513020848	2490001	2500000	0	0	0	0	0	0	0	0	0	0	0	0	0	0.146702	0	0.13649	0	0.139829	0.131882	0.132314	0	0.132009	0	0	0	0	0	0.226236	0.385359	0.321418	0.806692	0.631743	0.279191	0.440824	0.377739	0.872572	0.700419
2513020848	2495001	2505000	5.7969	5.76126	4.72782	5.43527	5.43048	5.91462	6.04086	4.50611	4.5912	5.00632	4.84557	5.64329	5.06184	4.25352	4.60378	4.66171	5.09089	4.82267	3.74705	4.69564	4.60797	4.26509	4.01643	3.70266	5.38491	4.05953	4.59661	0.24958	0.442229	0.178477	0.774514	0.582094	0.279191	0.473476	0.377739	0.872572	0.700419
2513020848	2500001	2510000	5.7969	5.76126	4.72782	5.43527	5.58075	5.91462	6.04086	4.50611	4.5912	5.00632	4.84557	5.64329	5.06184	4.25352	4.60378	4.66171	5.09089	4.82267	3.74705	4.69564	4.60797	4.26509	4.01643	3.70266	5.38491	4.05953	4.59661	0.245553	0.429079	0.203194	0.784113	0.590763	0.279191	0.46179	0.377739	0.872572	0.700419
2513020848	2505001	2515000	5.7969	5.76126	4.72782	5.43527	5.58075	5.91462	6.04086	4.50611	4.5912	5.00632	4.84557	5.64329	5.06184	4.08993	4.60378	4.66171	5.09089	4.82267	3.74705	4.69564	4.60797	4.26509	4.01643	3.70266	5.38491	4.05953	4.59661	0.248648	0.428824	0.204429	0.788156	0.589269	0.279191	0.46179	0.377739	0.872572	0.700419
2513020848	2510001	2520000	0	0	0	0	0.143267	0	0	0	0	0	0	0	0	0	0	0.136978	0	0	0	0.266865	0	0.141652	0.147085	0	0	0.12893	0	0.235263	0.387109	0.315585	0.816423	0.62234	0.279191	0.440824	0.377739	0.872572	0.700419
2513020848	2515001	2525000	0	0	0	0	0	0	0	0	0	0	0	0	0	0	0	0.143335	0	0	0.974314	1.26119	0	0.140216	0.147085	0	0	0.12893	0	0.22021	0.375292	0.345545	0.804192	0.633872	0.279191	0.440824	0.382883	0.872572	0.700419
2513020848	2520001	2530000	0	0	0	0	0	0	0	0	0	0	0	0	0	0	0	0.143335	0	0	0.974314	1.26119	0	0.140216	0.147085	0	0	0.12893	0	0.222619	0.377308	0.339465	0.806186	0.632131	0.279191	0.440824	0.37974	0.872572	0.700419
2513020848	2525001	2535000	0	0.140104	0	0	0	0	0	0	0	0	0.146044	0.147388	0	0.145488	0.143132	0	0.146165	0.143821	1.11329	1.12128	0	0.140077	0	0	0	0.131524	0	0.216111	0.376521	0.338933	0.799485	0.638592	0.279191	0.440824	0.379503	0.872572	0.700419
2513020848	2530001	2540000	0	0.140104	0	0	0	0	0	0	0	0	0.146044	0.147388	0	0.145488	0.143132	0	0.146165	0.143821	0.135519	0.135621	0	0.135954	0	0	0	0.131524	0	0.229389	0.386438	0.316822	0.810458	0.629214	0.279191	0.440824	0.377739	0.872572	0.700419
2513020848	2535001	2545000	0	0.140104	0	0	0	0.145606	0.150137	0	0	0	0.146044	0.147388	0	0.145488	0.143132	0.143404	0.146165	0.284943	0.404698	0.142375	0.145333	0.271908	0	0	0	0.131524	0	0.23009	0.381781	0.322092	0.805478	0.633638	0.279191	0.440824	0.377739	0.872572	0.700419
2513020848	2540001	2550000	0	0	0	0	0.141378	0.285861	0.150137	0	0	0	0	0	0	0	0	0.283181	0	0.141198	0.404057	0.142375	0.145333	0.268913	0	0	0	0.130878	0.128299	0.238635	0.380847	0.326834	0.817424	0.621578	0.279191	0.440824	0.377739	0.872572	0.700419
2513020848	2545001	2555000	0	0	0	0	0.141378	0.285861	0.150137	0	0	0	0	0	0	0	0	0.283181	0	0.141198	0.403712	0.142375	0.145333	0.268913	0	0	0	0.130878	0.128299	0.23916	0.37938	0.330371	0.817659	0.621265	0.279191	0.440824	0.377739	0.872572	0.700419
2513020848	2550001	2560000	0	0	0	0	0.141378	0.140613	0	0	0	0	0	0	0	0	0	0.139966	0	0	0.134686	0.134419	0	0.134456	0	0	0	0.130878	0.128299	0.238509	0.384598	0.328365	0.826948	0.612816	0.279191	0.440824	0.377739	0.872572	0.700419
2513020848	2555001	2565000	0.157321	0	0	0.143786	0.140873	0.149383	0	0	0	0	0	0	0	0	0	0	0.144541	0	0	0	0	0	0	0.452296	0	0.26214	0.254823	0.232942	0.392035	0.311603	0.82661	0.604506	0.279191	0.440824	0.377739	0.872572	0.700419
2513020848	2560001	2570000	0.157321	0	0	0.143786	0.140873	0.149383	0	0	0	0	0	0	0	0	0	0	0.144541	0	0	0	0	0	0	0.452296	0	0.26214	0.254823	0.233398	0.391497	0.311241	0.825111	0.607321	0.279191	0.440824	0.377739	0.872572	0.700419
2513020848	2565001	2575000	0.157321	0	0	0.143786	0.140873	0.149383	0	0	0	0	0	0	0	0	0	0	0.144541	0	0	0	0	0	0	0.452296	0	0.26214	0.254823	0.233213	0.391715	0.311387	0.825721	0.606182	0.279191	0.440824	0.377739	0.872572	0.700419
2513020848	2570001	2580000	0	0	0	0	0	0	0	0	0	0	0	0	0	0	0	0	0	0	0	0	0	0	0	0	0	0	0	0.236051	0.388488	0.309227	0.816099	0.623295	0.279191	0.440824	0.377739	0.872572	0.700419
2513020848	2575001	2585000	0	0	0	0	0	0	0	0	0	0	0.142864	0	0	0	0	0	0	0	0	0	0	0	0	0	0	0	0	0.235627	0.386631	0.307011	0.816448	0.624515	0.279191	0.440824	0.377739	0.872572	0.700419
2513020848	2580001	2590000	0	0	0	0.131787	0	0	0.135096	0	0	0	0.142864	0	0	0	0	0	0.141378	0	0	0	0.137046	0	0	0.148287	0	0.126124	0.121312	0.238616	0.385233	0.312018	0.825495	0.616077	0.279191	0.440824	0.377739	0.872572	0.700419
2513020848	2585001	2595000	0.464659	0.304533	0.311985	0.478268	0.303504	0.301852	0.466501	0.318336	0.298277	0.293321	0.450721	0.300172	0.299361	0.292412	0.290282	0.427804	0.442165	0.291212	0.277908	0.405827	0.435768	0.274919	0.288354	0.455425	0.303504	0.389464	0.386412	0.233483	0.386807	0.306558	0.812342	0.610797	0.279191	0.440824	0.377739	0.872572	0.700419
2513020848	2590001	2600000	0.464659	0.304533	0.311985	0.46191	0.303504	0.301852	0.466501	0.318336	0.298277	0.293321	0.300481	0.300172	0.299361	0.292412	0.290282	0.427804	0.442165	0.291212	0.277908	0.415268	0.435768	0.274919	0.288354	0.455425	0.303504	0.398688	0.386412	0.234549	0.389249	0.310326	0.813419	0.612857	0.279191	0.440824	0.377739	0.872572	0.700419
2513020848	2595001	2605000	0.464659	0.304533	0.467978	0.318846	0.455255	0.301852	0.31114	0.318336	0.298277	0.440107	0.450721	0.300172	0.449042	0.438618	0.290282	0.570405	0.44256	0.436817	0.41694	0.55369	0.435883	0.412379	0.432639	0.303617	0.303504	0.265826	0.257608	0.231481	0.388938	0.312086	0.803917	0.628491	0.279191	0.440824	0.377739	0.872572	0.700419
2513020848	2600001	2610000	0	0	0.141962	0	0.144394	0.134724	0	0	0	0.147301	0.148566	0	0.149933	0.14637	0	0.143542	0.150344	0.148946	0.140049	0.272719	0.149187	0.141348	0.148058	0	0	0	0	0.232512	0.386468	0.318137	0.809389	0.630483	0.279191	0.440824	0.377739	0.872572	0.700419
2513020848	2605001	2615000	0	0	0.141962	0	0.144394	0.134724	0	0	0	0.147301	0.148566	0	0.149933	0.14637	0	0.143542	0.150344	0.148946	0.140049	0.402191	0.149187	0.141348	0.148058	0	0	0	0	0.230457	0.385689	0.320097	0.808403	0.631384	0.279191	0.440824	0.377739	0.872572	0.700419
2513020848	2610001	2620000	0	0	0	0	0	0.134724	0	0	0	0	0	0	0	0	0	0	0	0	0	0.266689	0	0	0	0	0	0	0	0.232866	0.386379	0.313402	0.815574	0.62263	0.279191	0.440824	0.377739	0.872572	0.700419
2513020848	2615001	2625000	0	0	0	0	0	0	0	0	0	0	0	0	0	0	0	0	0	0	0	0.133682	0	0	0	0	0	0	0	0.23444	0.387924	0.310315	0.815712	0.623644	0.279191	0.440824	0.377739	0.872572	0.700419
2513020848	2620001	2630000	0	0	0	0	0	0	0	0	0	0	0	0	0	0	0	0	0	0	0	0	0	0	0	0	0	0	0	0.236051	0.388488	0.309227	0.816099	0.623295	0.279191	0.440824	0.377739	0.872572	0.700419
2513020848	2625001	2635000	0	0	0	0	0	0	0	0	0	0	0	0	0	0	0	0	0	0	0	0	0	0	0	0	0	0	0	0.236051	0.388488	0.309227	0.816099	0.623295	0.279191	0.440824	0.377739	0.872572	0.700419
2513020848	2630001	2640000	0	0	0	0	0	0	0	0	0	0	0	0	0	0	0	0	0	0	0	0	0	0	0	0	0	0	0	0.236051	0.388488	0.309227	0.816099	0.623295	0.279191	0.440824	0.377739	0.872572	0.700419
2513020848	2635001	2645000	0.145527	0	0	0	0	0	0	0	0	0	0	0	0	0	0	0	0	0	0	0	0	0	0	0	0	0	0	0.233238	0.387554	0.312084	0.812977	0.617666	0.279191	0.440824	0.377739	0.872572	0.700419
2513020848	2640001	2650000	0.145527	0	0	0	0	0	0	0	0	0	0	0	0	0	0	0	0	0	0	0	0	0	0	0	0	0	0	0.233443	0.387622	0.311872	0.813206	0.618077	0.279191	0.440824	0.377739	0.872572	0.700419
2513020848	2645001	2655000	0.145527	0	0	0.147564	0.139135	0	0	0	0	0	0	0	0	0	0	0	0	0	0.135336	0	0	0	0	0.151417	0	0	0.124983	0.233049	0.388885	0.312183	0.816718	0.612865	0.279191	0.440824	0.377739	0.872572	0.700419
2513020848	2650001	2660000	0	0	0.13587	0.132445	0.139135	0	0	0	0	0	0	0	0	0	0.140049	0	0.142765	0	0.131585	0.131819	0	0.132136	0	0.151417	0	0	0.124844	0.234845	0.386063	0.313139	0.813331	0.618905	0.279191	0.440824	0.377739	0.872572	0.700419
2513020848	2655001	2665000	0	0.155157	0.280544	0.274411	0.282938	0	0.148994	0	0	0	0	0	0	0	0.290053	0	0.296852	0.143856	0.266654	0.131819	0	0.132136	0	0.151417	0	0	0.12502	0.232234	0.381664	0.316057	0.80135	0.613029	0.279191	0.440824	0.377739	0.872572	0.700419
2513020848	2660001	2670000	0	0.155157	0.280544	0.132445	0.144249	0	0.148994	0	0	0	0	0	0	0	0.290053	0	0.296852	0.143856	0.264434	0.264858	0.139214	0.264273	0	0	0	0	0	0.233433	0.376701	0.321024	0.796196	0.619356	0.279191	0.440824	0.377739	0.872572	0.700419
2513020848	2665001	2675000	0.147653	0.155157	0.282396	0.284302	0.144249	0	0.148994	0	0	0	0	0	0	0	0.152209	0	0.156943	0.151252	0.274228	0.133067	0.138928	0.133808	0	0	0	0	0	0.231505	0.380538	0.311291	0.797881	0.610182	0.279191	0.440824	0.377739	0.872572	0.700419
2513020848	2670001	2680000	0.147653	0	0.137274	0.140356	0	0	0	0	0	0	0	0	0	0	0	0	0	0	0.132879	0.133067	0.138928	0.133808	0	0	0	0	0	0.234357	0.385145	0.308615	0.8104	0.616264	0.279191	0.440824	0.377739	0.872572	0.700419
2513020848	2675001	2685000	0.147653	0	0.138103	0.140757	0	0	0	0	0	0	0	0	0	0	0	0	0	0	0	0	0	0.135683	0	0	0	0	0	0.234644	0.386913	0.305049	0.811467	0.614875	0.279191	0.440824	0.377739	0.872572	0.700419
2513020848	2680001	2690000	0	0	0	0	0	0	0	0	0	0	0	0	0	0	0	0	0	0	0	0	0	0.135683	0	0	0	0	0	0.237089	0.387024	0.310549	0.816423	0.623118	0.279191	0.440824	0.377739	0.872572	0.700419
2513020848	2685001	2695000	0.151639	0	0.144951	0	0	0.148426	0	0	0	0	0	0	0	0	0	0.279278	0	0	0.136446	0.140641	0	0.13649	0.147432	0	0	0	0	0.237269	0.387676	0.315914	0.804961	0.618533	0.279191	0.440824	0.377739	0.872572	0.700419
2513020848	2690001	2700000	0.151639	0	0.154357	0	0	0.148426	0	0	0	0	0	0	0	0	0	0.279278	0	0	0.136446	0.140641	0	0	0.147432	0	0	0	0	0.236075	0.389142	0.313077	0.807156	0.619611	0.279191	0.440824	0.377739	0.872572	0.700419
2513020848	2695001	2705000	0.151639	0	0.154357	0	0	0.148426	0	0	0	0	0	0	0	0	0	0.279278	0	0	0.136446	0.140641	0	0	0.147432	0	0	0	0	0.236072	0.389086	0.312755	0.807902	0.619915	0.279191	0.440824	0.377739	0.872572	0.700419
2513020848	2700001	2710000	0	0	0	0	0	0	0	0	0	0	0	0	0	0	0	0	0	0.144213	0.135136	0.13558	0	0	0	0	0	0	0	0.230118	0.386082	0.314009	0.813264	0.626006	0.279191	0.440824	0.377739	0.872572	0.700419
2513020848	2705001	2715000	0	0	0	0	0	0	0	0	0	0	0	0	0	0.143611	0	0	0	0.144213	0.135136	0.13558	0	0	0	0	0	0	0	0.221371	0.383464	0.31913	0.806608	0.631426	0.279191	0.440824	0.377739	0.872572	0.700419
2513020848	2710001	2720000	0	0	0	0	0.142025	0	0	0	0	0.142439	0	0	0	0.143611	0	0	0	0.144213	0.269141	0.13558	0.149631	0.135996	0.144913	0	0	0	0	0.225884	0.375927	0.3248	0.80203	0.629246	0.279191	0.440824	0.377739	0.872572	0.700419
2513020848	2715001	2725000	0	0.142407	0	0.141348	0.282816	0	0	0	0	0.142439	0	0	0	0.143611	0.143473	0	0	0	0.134008	0	0.291766	0.272289	0.144913	0	0	0	0	0.239878	0.378802	0.31564	0.803393	0.616475	0.279191	0.440824	0.377739	0.872572	0.700419
2513020848	2720001	2730000	0	0.142407	0	0.141348	0.282816	0	0	0	0	0.142439	0	0	0	0	0.143473	0	0	0	0.134008	0	0.291766	0.272289	0.144913	0	0	0	0	0.242657	0.381473	0.312906	0.809059	0.615382	0.279191	0.440824	0.377739	0.872572	0.700419
2513020848	2725001	2735000	0	0.142407	0	0.141348	0.140786	0	0	0	0	0	0	0	0	0	0.143473	0	0	0	0	0	0.142831	0.136295	0	0	0	0	0	0.238566	0.384753	0.31121	0.810299	0.61739	0.279191	0.440824	0.377739	0.872572	0.700419
2513020848	2730001	2740000	0	0	0	0	0	0	0	0	0	0	0	0	0	0	0	0	0	0	0	0	0	0	0	0	0	0	0	0.236051	0.388488	0.309227	0.816099	0.623295	0.279191	0.440824	0.377739	0.872572	0.700419
2513020848	2735001	2745000	0	0	0.140873	0	0.1419	0	0	0	0	0	0	0	0	0	0	0.142634	0	0	0.274411	0.136843	0	0.136102	0	0	0	0	0	0.23609	0.387308	0.315196	0.8089	0.623683	0.279191	0.440824	0.377739	0.872572	0.700419
2513020848	2740001	2750000	0	0	0.140873	0	0.1419	0	0	0	0	0	0	0	0	0	0	0.142634	0	0	0.274411	0.136843	0	0.136102	0	0	0	0	0	0.236097	0.387183	0.315853	0.808116	0.62373	0.279191	0.440824	0.377739	0.872572	0.700419
2513020848	2745001	2755000	0	0	0.140873	0	0.1419	0	0	0	0	0	0	0	0	0	0	0.142634	0	0	0.274411	0.136843	0	0.136102	0	0	0	0	0	0.236091	0.387282	0.315335	0.808734	0.623693	0.279191	0.440824	0.377739	0.872572	0.700419
2513020848	2750001	2760000	0	0	0	0	0	0	0	0	0	0	0	0	0	0	0	0	0.145803	0.142278	0.135356	0.134475	0	0.134268	0	0	0	0	0	0.230369	0.383197	0.318857	0.810184	0.628185	0.279191	0.440824	0.377739	0.872572	0.700419
2513020848	2755001	2765000	0	0	0	0	0	0	0	0	0	0	0	0	0	0	0	0	0.145803	0.142278	0.135356	0.134475	0	0.134268	0	0	0	0	0	0.23041	0.383235	0.318786	0.810228	0.62815	0.279191	0.440824	0.377739	0.872572	0.700419
2513020848	2760001	2770000	0	0	0	0	0	0	0	0	0	0	0	0	0	0	0	0	0.145803	0.142278	0.135356	0.134475	0	0.265155	0	0	0	0	0	0.232331	0.382163	0.322845	0.81184	0.625492	0.279191	0.440824	0.377739	0.872572	0.700419
2513020848	2765001	2775000	0	0	0	0	0.14637	0	0	0	0	0	0	0.143927	0	0	0	0.138103	0.143751	0	0	0.134193	0.141775	0.131554	0	0	0	0	0	0.237854	0.39383	0.315553	0.813211	0.627361	0.279191	0.440824	0.377739	0.872572	0.700419
2513020848	2770001	2780000	0	0	0	0.282218	0.14637	0	0	0	0	0	0	0.143927	0	0	0	0.138103	0.143751	0	0	0.134193	0.141775	0.131554	0	0	0	0	0	0.236802	0.393961	0.311125	0.811865	0.623605	0.279191	0.440824	0.377739	0.872572	0.700419
2513020848	2775001	2785000	0	0.134782	0.135176	0.422972	0.275059	0	0	0	0	0	0.148426	0.143927	0	0	0	0.138103	0.143751	0	0	0.134193	0.141775	0	0	0	0	0	0	0.235724	0.395717	0.296494	0.803908	0.616557	0.279191	0.440824	0.377739	0.872572	0.700419
2513020848	2780001	2790000	0.145141	0.134782	0.267291	0.563963	0.131993	0	0	0	0	0	0.148426	0.149139	0	0	0.141591	0	0	0	0	0	0.139693	0	0	0	0	0	0	0.232347	0.393052	0.282726	0.794189	0.600128	0.279191	0.440824	0.377739	0.872572	0.700419
2513020848	2785001	2795000	0.145141	0.134782	0.267291	0.271366	0.131993	0	0	0	0	0	0.148426	0.149139	0	0	0.141591	0	0	0	0	0	0.139693	0.137624	0	0	0	0	0	0.235377	0.389105	0.290509	0.797632	0.605234	0.279191	0.440824	0.377739	0.872572	0.700419
2513020848	2790001	2800000	0.145141	0	0.135176	0.13716	0	0	0	0	0	0	0	0.149139	0	0	0.141591	0	0	0	0	0	0.139693	0.139829	0	0	0	0	0	0.235653	0.390411	0.305567	0.808462	0.619027	0.279191	0.440824	0.377739	0.872572	0.700419
2513020848	2795001	2805000	0	0	0	0	0	0	0	0	0	0	0	0	0	0	0	0	0	0	0	0	0	0.139829	0	0	0	0	0	0.237516	0.386428	0.311092	0.816552	0.623046	0.279191	0.440824	0.377739	0.872572	0.700419
2513020848	2800001	2810000	1.54548	1.64105	1.19994	1.65148	1.62259	1.47149	1.5433	1.5085	1.45332	1.52878	1.71637	1.57744	1.84469	1.13175	0.712356	0.712518	1.00576	0.578755	0.684328	0.820125	0.722154	0.697792	0.58087	1.58126	1.46661	1.40353	0.99506	0.269519	0.49678	0.131223	0.839716	0.605304	0.295922	0.524649	0.377739	0.872572	0.700419
2513020848	2805001	2815000	1.54548	1.79313	1.19994	1.64757	1.77323	1.61809	1.5433	1.5085	1.45332	1.66838	1.86649	1.57744	1.98835	1.13175	0.856591	0.712518	1.00576	0.578755	0.682013	0.799857	0.721972	0.697792	0.58087	1.58126	1.46661	1.40353	0.993789	0.27278	0.48755	0.135498	0.829871	0.616766	0.299227	0.51582	0.377739	0.872572	0.700419
2513020848	2810001	2820000	1.54548	1.79313	1.19994	1.64757	1.77323	1.61809	1.5433	1.5085	1.45332	1.66838	1.86649	1.57744	1.98835	1.13175	0.856591	0.712518	1.00576	0.578755	0.682013	0.799857	0.721972	0.697792	0.58087	1.58126	1.46661	1.40353	0.993789	0.258142	0.449196	0.186974	0.831112	0.618853	0.284747	0.47952	0.377739	0.872572	0.700419
2513020848	2815001	2825000	0	0.146577	0	0.53913	0.144578	0.140844	0	0	0	0.142471	0.150396	0	0.148195	0	0.144322	0	0	0	0	0	0	0	0	0	0	0	0	0.237002	0.390672	0.296834	0.811171	0.622079	0.279191	0.440824	0.377739	0.872572	0.700419
2513020848	2820001	2830000	0	0	0	0.53913	0	0	0	0	0	0	0	0	0	0	0	0	0	0	0	0	0	0	0	0	0	0	0	0.234605	0.390007	0.303317	0.812961	0.61776	0.279191	0.440824	0.377739	0.872572	0.700419
2513020848	2825001	2835000	0	0	0	0.53913	0	0	0	0	0	0	0	0	0	0	0	0	0	0	0	0	0	0	0	0	0	0	0	0.234182	0.390484	0.301551	0.812014	0.616093	0.279191	0.440824	0.377739	0.872572	0.700419
2513020848	2830001	2840000	0	0	0	0	0	0	0	0	0	0	0	0	0	0	0	0	0	0	0	0	0	0	0	0	0	0	0	0.236051	0.388488	0.309878	0.816026	0.623748	0.279191	0.440824	0.377739	0.872572	0.700419
2513020848	2835001	2845000	0	0	0	0	0	0	0	0	0	0	0	0	0	0	0	0	0	0	0	0	0	0	0	0	0	0	0	0.236051	0.388488	0.310155	0.815992	0.623941	0.279191	0.440824	0.377739	0.872572	0.700419
2513020848	2840001	2850000	0	0	0	0	0	0	0	0	0	0	0	0	0	0	0	0	0	0	0	0	0	0	0	0	0	0	0	0.236051	0.388488	0.310109	0.815998	0.62391	0.279191	0.440824	0.377739	0.872572	0.700419
2513020848	2845001	2855000	0	0	0	0	0	0	0.149781	0	0	0	0	0	0	0	0	0	0	0	0	0	0	0	0	0	0	0	0.132298	0.239206	0.383477	0.30774	0.829914	0.61382	0.279191	0.440824	0.377739	0.872572	0.700419
2513020848	2850001	2860000	0	0	0	0	0	0	0.149781	0	0	0	0	0	0	0	0	0	0	0	0	0	0	0	0	0	0	0	0.258064	0.239421	0.384107	0.310029	0.833005	0.611128	0.279191	0.440824	0.377739	0.872572	0.700419
2513020848	2855001	2865000	0	0.142504	0	0	0	0	0.149781	0	0	0	0	0	0	0	0	0	0	0	0	0	0	0	0	0	0	0	0.258064	0.239604	0.385405	0.307754	0.82563	0.611223	0.279191	0.440824	0.377739	0.872572	0.700419
2513020848	2860001	2870000	0	0.142504	0	0	0	0	0	0	0	0	0	0	0	0	0	0	0	0	0	0	0	0	0	0	0	0	0.126424	0.238108	0.387689	0.308461	0.819319	0.615744	0.279191	0.440824	0.377739	0.872572	0.700419
2513020848	2865001	2875000	0.153843	0.285007	0.133574	0.143927	0.271908	0.141962	0.145294	0.142088	0.132495	0	0.151252	0	0	0	0.143199	0.147085	0.148103	0.147042	0.137251	0.138447	0.292905	0.139083	0.146745	0.155851	0	0.138249	0.136359	0.237864	0.374957	0.305664	0.809485	0.607621	0.279191	0.440824	0.377739	0.872572	0.700419
2513020848	2870001	2880000	0.153843	0.142215	0.133574	0.143927	0.271908	0.141962	0.145294	0.142088	0.132495	0	0.151252	0	0	0	0.143199	0.147085	0.297038	0.147042	0.137251	0.277045	0.439982	0.139083	0.146745	0.155851	0	0.138249	0.272675	0.237661	0.372686	0.313708	0.815736	0.609072	0.279191	0.440824	0.377739	0.872572	0.700419
2513020848	2875001	2885000	0.153843	0.142215	0.134082	0.143927	0.271908	0.141962	0.145294	0.142088	0.132495	0	0.151252	0	0	0	0.143199	0.147085	0.297038	0.147042	0.137251	0.277045	0.439982	0.139083	0.146745	0.155851	0	0.138249	0.272675	0.237313	0.375979	0.312749	0.815847	0.612062	0.279191	0.440824	0.377739	0.872572	0.700419
2513020848	2880001	2890000	0	0	0	0	0	0	0	0	0	0	0	0	0	0	0	0	0.148946	0	0.14337	0.138598	0.147085	0	0	0	0	0	0.13185	0.236919	0.38631	0.314179	0.817913	0.622178	0.279191	0.440824	0.377739	0.872572	0.700419
2513020848	2885001	2895000	0	0	0	0	0	0	0	0	0	0	0.144615	0	0	0	0	0	0	0	0.139057	0	0	0	0	0	0	0	0	0.235933	0.38676	0.308822	0.81564	0.624671	0.279191	0.440824	0.377739	0.872572	0.700419
2513020848	2890001	2900000	0	0	0	0	0.139346	0	0	0	0	0	0.144615	0	0	0	0	0	0	0.144726	0.139057	0	0.143132	0	0	0	0	0	0	0.233287	0.385052	0.309185	0.814901	0.625983	0.279191	0.440824	0.377739	0.872572	0.700419
2513020848	2895001	2905000	0	0.148195	0	0	0.284685	0	0	0	0	0	0.144615	0	0	0	0	0	0.146577	0.288643	0.136187	0	0.286876	0.136687	0	0	0	0	0.125604	0.233749	0.381109	0.311641	0.814691	0.62017	0.279191	0.440824	0.377739	0.872572	0.700419
2513020848	2900001	2910000	0	0.148195	0	0	0.284685	0	0	0	0	0	0	0	0	0	0	0	0.146577	0.288643	0.136732	0	0.286876	0.136687	0	0	0	0	0.125604	0.233924	0.382045	0.313685	0.814243	0.618939	0.279191	0.440824	0.377739	0.872572	0.700419
2513020848	2905001	2915000	0	0.148195	0	0	0.146044	0	0	0	0	0	0	0	0	0	0	0	0.146577	0.143927	0.136081	0	0.143751	0.136687	0	0	0	0	0.12672	0.236918	0.384025	0.313029	0.815191	0.617755	0.279191	0.440824	0.377739	0.872572	0.700419
2513020848	2910001	2920000	0	0	0	0.145764	0	0	0	0	0	0	0	0	0	0	0	0	0	0	0	0	0	0	0	0	0	0	0	0.235556	0.38899	0.307052	0.815057	0.621306	0.279191	0.440824	0.377739	0.872572	0.700419
2513020848	2915001	2925000	0	0	0	0.146084	0	0	0	0	0	0	0	0	0	0	0	0	0	0	0	0	0	0	0	0	0	0	0	0.235563	0.388983	0.307083	0.815072	0.621335	0.279191	0.440824	0.377739	0.872572	0.700419
2513020848	2920001	2930000	0	0	0	0.146084	0	0	0	0	0	0	0.150819	0	0	0	0	0	0	0	0.139612	0	0	0	0	0	0	0	0	0.235412	0.386586	0.306562	0.814508	0.623302	0.279191	0.440824	0.377739	0.872572	0.700419
2513020848	2925001	2935000	0	0	0	0	0	0	0	0	0	0.141806	0.150819	0	0	0	0	0	0	0	0.139612	0	0	0	0	0	0	0	0	0.236284	0.386448	0.306391	0.814462	0.624246	0.279191	0.440824	0.377739	0.872572	0.700419
2513020848	2930001	2940000	0.303617	0	0.452616	0.293828	0.447854	0.298569	0	0	0	0.141806	0.150819	0	0	0	0	0	0	0	0.139612	0	0	0	0	0.301002	0	0.26389	0.260329	0.228902	0.386172	0.290465	0.814506	0.57384	0.279191	0.440824	0.377739	0.872572	0.700419
2513020848	2935001	2945000	0.303617	0	0.560863	0.293828	0.447854	0.298569	0	0	0	0.141806	0	0	0	0	0	0.138826	0	0.141469	0	0.133899	0.141138	0	0	0.301002	0	0.26389	0.260329	0.204797	0.390335	0.284206	0.79335	0.474987	0.279191	0.440824	0.377739	0.872572	0.700419
2513020848	2940001	2950000	0.303617	0	0.560863	0.272632	0.447854	0.298569	0	0	0	0	0	0	0	0	0	0.138826	0	0.141469	0.13338	0.26787	0.141138	0	0	0.301002	0	0.266936	0.26109	0.156292	0.378851	0.298374	0.758017	0.319282	0.279191	0.440824	0.377739	0.872572	0.700419
2513020848	2945001	2955000	0	0	0.138249	0	0	0	0	0	0	0	0	0	0	0	0	0.138826	0	0.141469	0.13338	0.268017	0.141138	0	0	0	0	0	0	0.202169	0.83604	0.0315474	0.127667	0.215332	0.279191	0.848198	0.377739	0.872572	0.700419
2513020848	2950001	2960000	0.153467	0.144838	0	0	0.145843	0.141408	0	0	0	0.145724	0	0	0	0	0	0	0	0	0.266306	0.272289	0	0.271078	0.146044	0	0	0.130531	0.128263	0.237611	0.358827	0.316258	0.818541	0.564284	0.279191	0.440824	0.377739	0.872572	0.700419
2513020848	2955001	2965000	0.153467	0.144838	0	0	0.294342	0.278957	0	0	0	0.145724	0	0	0	0	0	0	0	0	0.27195	0.277095	0	0.271078	0.146044	0	0	0.130531	0.257012	0.238941	0.366814	0.307902	0.82876	0.575337	0.279191	0.440824	0.377739	0.872572	0.700419
2513020848	2960001	2970000	0.153467	0.144838	0	0	0.294342	0.278957	0	0	0	0.145724	0	0	0	0	0	0	0	0	0.27195	0.277095	0	0.271078	0.146044	0	0	0.130531	0.257012	0.238026	0.373089	0.308237	0.825075	0.589432	0.279191	0.440824	0.377739	0.872572	0.700419
2513020848	2965001	2975000	0	0	0	0	0.148566	0.137766	0	0	0	0	0	0	0	0	0	0	0	0	0.137436	0.136665	0	0	0	0	0	0	0.128741	0.234918	0.384295	0.30936	0.821411	0.616583	0.279191	0.440824	0.377739	0.872572	0.700419
2513020848	2970001	2980000	0	0	0	0	0	0	0	0	0	0	0	0	0	0	0	0	0	0	0	0	0	0	0	0	0	0	0	0.236051	0.388488	0.309227	0.816099	0.623295	0.279191	0.440824	0.377739	0.872572	0.700419
2513020848	2975001	2985000	0.152797	0	0.148566	0	0.149432	0.14909	0	0	0	0	0	0	0	0	0	0	0	0.148473	0.140498	0	0	0.138749	0	0	0	0	0	0.221586	0.374277	0.298923	0.793956	0.60132	0.279191	0.440824	0.377739	0.872572	0.700419
2513020848	2980001	2990000	0.152797	0	0.148566	0	0.149432	0.14909	0	0	0	0	0	0	0	0	0	0	0	0.148473	0.140498	0	0	0.138749	0	0	0	0	0	0.203468	0.355985	0.285919	0.76307	0.572292	0.279191	0.440824	0.377739	0.872572	0.700419
2513020848	2985001	2995000	0.146577	0	0.139856	0	0.149432	0.14909	0	0	0	0	0	0	0	0	0	0	0	0.148473	0.140498	0	0	0.135116	0	0	0	0	0	0.225287	0.377981	0.309605	0.802893	0.604278	0.279191	0.440824	0.377739	0.872572	0.700419
2513020848	2990001	3000000	0	0	0	0	0	0	0	0	0	0	0	0	0	0	0	0	0	0	0	0	0	0	0	0	0	0	0	0.236051	0.388488	0.315621	0.818456	0.620589	0.279191	0.440824	0.377739	0.872572	0.700419
2513020848	2995001	3005000	0	0	0	0	0	0	0	0	0	0	0	0	0	0	0	0	0	0	0	0	0	0	0	0	0	0	0	0.236051	0.388488	0.316667	0.81881	0.620133	0.279191	0.440824	0.377739	0.872572	0.700419
2513020848	3000001	3010000	0	0	0	0	0	0	0	0	0	0	0	0	0	0	0	0	0	0	0	0	0	0	0	0	0	0	0	0.236051	0.388488	0.309227	0.816099	0.623295	0.279191	0.440824	0.377739	0.872572	0.700419
2513020848	3005001	3015000	0	0	0.144726	0.144838	0	0	0	0	0	0	0.147922	0	0	0	0.145103	0	0	0	0	0	0	0	0	0	0	0	0	0.233909	0.383133	0.300778	0.806282	0.619947	0.279191	0.440824	0.377739	0.872572	0.700419
2513020848	3010001	3020000	0	0	0.139802	0.144838	0	0	0	0	0	0	0.147922	0	0	0	0.145103	0	0	0	0	0	0	0	0	0	0	0	0	0.234897	0.385615	0.304757	0.810949	0.621605	0.279191	0.440824	0.377739	0.872572	0.700419
2513020848	3015001	3025000	0.149432	0	0.289452	0.144838	0	0.141168	0	0	0	0.289452	0.147922	0	0	0	0.145103	0.142342	0.146165	0.145256	0.277805	0.135498	0	0.135057	0	0	0	0	0.127594	0.231615	0.381378	0.307911	0.80311	0.611008	0.279191	0.440824	0.377739	0.872572	0.700419
2513020848	3020001	3030000	0.149432	0	0.139966	0	0	0.283242	0	0	0	0.289452	0	0	0	0	0	0.144322	0.146165	0.145256	0.277805	0.135498	0	0.272034	0	0	0	0	0.127594	0.234583	0.381163	0.313617	0.808366	0.611579	0.279191	0.440824	0.377739	0.872572	0.700419
2513020848	3025001	3035000	0.149432	0	0.145217	0	0	0.283242	0	0	0	0.289452	0	0	0	0	0	0.144322	0.146165	0.145256	0.277805	0.135498	0	0.277601	0	0	0	0	0.127594	0.234628	0.38101	0.313648	0.808224	0.61131	0.279191	0.440824	0.377739	0.872572	0.700419
2513020848	3030001	3040000	0	0	0	0	0	0.142088	0	0	0	0	0	0	0	0	0	0	0	0	0.143064	0.144615	0	0.285861	0	0	0	0	0	0.236694	0.384573	0.312357	0.815466	0.623829	0.279191	0.440824	0.377739	0.872572	0.700419
2513020848	3035001	3045000	0.14885	0	0	0	0	0	0	0	0	0	0	0	0	0	0	0.141775	0	0	0.282218	0.282938	0.290282	0.143681	0	0	0	0	0	0.235368	0.385022	0.319252	0.810418	0.622095	0.279191	0.440824	0.377739	0.872572	0.700419
2513020848	3040001	3050000	0.147042	0	0	0	0	0	0	0	0	0	0	0	0	0	0	0.141775	0	0	0.282218	0.282938	0.290282	0.143681	0	0	0	0	0	0.235408	0.385119	0.318988	0.810593	0.622187	0.279191	0.440824	0.377739	0.872572	0.700419
2513020848	3045001	3055000	0.147042	0	0	0	0	0	0	0	0	0	0	0	0	0	0	0.141775	0	0	0.139372	0.138851	0.290282	0.136338	0	0	0	0	0	0.237047	0.385518	0.319889	0.811081	0.620527	0.279191	0.440824	0.377739	0.872572	0.700419
2513020848	3050001	3060000	0	0	0	0	0	0	0	0	0	0	0	0	0	0	0	0	0	0	0	0	0	0.136338	0	0	0	0	0	0.236886	0.387309	0.310772	0.817068	0.623126	0.279191	0.440824	0.377739	0.872572	0.700419
2513020848	3055001	3065000	0	0	0	0	0	0	0	0	0	0	0	0	0	0	0	0	0	0	0	0	0	0.136338	0	0	0	0	0	0.237214	0.386849	0.31138	0.817436	0.623059	0.279191	0.440824	0.377739	0.872572	0.700419
2513020848	3060001	3070000	0	0	0	0	0	0	0	0	0	0	0	0	0	0	0	0	0	0	0	0	0	0	0	0	0	0	0	0.236051	0.388488	0.309227	0.816099	0.623295	0.279191	0.440824	0.377739	0.872572	0.700419
2513020848	3065001	3075000	0	0	0	0	0	0	0	0	0	0	0	0	0	0	0	0	0	0	0	0	0	0	0	0	0	0	0	0.236051	0.388488	0.309902	0.816023	0.623765	0.279191	0.440824	0.377739	0.872572	0.700419
2513020848	3070001	3080000	0	0	0	0	0	0	0	0	0	0	0	0	0	0	0	0	0	0	0	0	0	0	0	0	0	0	0	0.236051	0.388488	0.309836	0.816031	0.623719	0.279191	0.440824	0.377739	0.872572	0.700419
2513020848	3075001	3085000	0	0	0	0	0	0	0	0	0	0	0	0	0	0	0	0	0	0	0	0	0	0	0	0	0	0	0	0.236051	0.388488	0.309778	0.816037	0.623678	0.279191	0.440824	0.377739	0.872572	0.700419
2513020848	3080001	3090000	3.75806	3.51892	3.72348	4.096	3.36956	3.80671	3.43359	2.7885	2.7505	3.20252	3.61077	2.58878	3.72495	4.07611	3.62782	3.70393	4.26644	4.06383	3.73611	5.06245	3.56995	3.70572	2.23038	3.04318	3.53732	3.10991	3.27843	0.180297	0.366407	0.355004	0.723208	0.623089	0.279191	0.440824	0.389063	0.872572	0.700419
2513020848	3085001	3095000	3.75806	3.51892	3.72348	4.06987	3.36956	3.80671	3.43359	2.7885	2.7505	3.20252	3.61077	2.58878	3.72495	4.07611	3.62782	3.70393	4.26644	4.06383	3.73611	5.06245	3.56995	3.70572	2.23038	3.04318	3.53732	3.10991	3.27843	0.16738	0.36084	0.369135	0.697435	0.623962	0.279191	0.440824	0.401066	0.872572	0.700419
2513020848	3090001	3100000	3.75806	3.51892	3.72348	4.06987	3.36956	3.80848	3.43359	2.7885	2.7505	3.20252	3.61077	2.58878	3.7285	4.07611	3.62922	3.70393	4.26644	4.06383	3.74611	5.06311	3.56995	3.70709	2.23038	3.04318	3.53732	3.10991	3.28003	0.137133	0.347831	0.407061	0.629323	0.627693	0.279191	0.440824	0.435274	0.872572	0.700419
2513020848	3095001	3105000	0	0	0	0	0	0	0	0	0	0	0	0	0	0	0	0	0	0	0	0	0	0	0	0	0	0	0	0.236051	0.388488	0.309227	0.816099	0.623295	0.279191	0.440824	0.377739	0.872572	0.700419
2513020848	3100001	3110000	0	0	0	0	0	0	0	0	0	0	0	0	0	0	0	0	0.144876	0	0	0	0.144951	0.13623	0	0	0	0	0	0.240201	0.385383	0.314824	0.814021	0.625124	0.279191	0.440824	0.377739	0.872572	0.700419
2513020848	3105001	3115000	0	0	0	0	0	0	0	0	0	0	0	0	0	0	0	0	0.144876	0	0	0	0.144951	0.13623	0	0	0	0	0	0.239037	0.386244	0.313255	0.814606	0.624614	0.279191	0.440824	0.377739	0.872572	0.700419
2513020848	3110001	3120000	0.278428	0.674594	0.128179	0	0.524878	0	0	0	0	0.557913	0.150712	0.427804	0.285662	0.698466	0.550119	0.540385	1.12982	0.705544	0.538743	0.542075	0.419079	1.05518	0	0.717882	0.437054	0.509108	0.494565	0.223037	0.4005	0.359414	0.793028	0.627149	0.279191	0.442677	0.392992	0.872572	0.700419
2513020848	3115001	3125000	0.278428	0.674594	0.128179	0	0.524878	0	0	0	0	0.557913	0.150712	0.427804	0.285662	0.698466	0.550119	0.540385	0.988595	0.705544	0.538897	0.542075	0.278271	0.922841	0	0.717882	0.437054	0.509108	0.493375	0.216533	0.406396	0.368249	0.788273	0.626776	0.279191	0.447112	0.400622	0.872572	0.700419
2513020848	3120001	3130000	0.278428	0.674594	0.128179	0	0.524878	0	0	0	0	0.557913	0.150712	0.427804	0.285662	0.698466	0.550119	0.540385	0.988595	0.705544	0.538897	0.542075	0.278271	0.922841	0	0.717882	0.437054	0.509108	0.493375	0.209299	0.413884	0.393862	0.776816	0.628047	0.279191	0.451164	0.424985	0.872572	0.700419
2513020848	3125001	3135000	0	0.144431	0	0	0.141591	0	0	0	0	0	0	0	0	0	0	0	0	0	0	0	0	0	0	0	0	0	0	0.238585	0.388358	0.296216	0.806829	0.607126	0.279191	0.440824	0.377739	0.872572	0.700419
2513020848	3130001	3140000	0	0.144431	0	0	0.141591	0	0	0	0	0	0	0	0	0	0	0	0	0	0	0	0	0	0	0	0	0	0	0.242233	0.388302	0.279513	0.794283	0.585651	0.279191	0.440824	0.377739	0.872572	0.700419
2513020848	3135001	3145000	0	0.144431	0	0	0.141591	0	0	0	0	0	0	0	0	0	0	0	0	0	0	0	0	0	0	0	0	0	0	0.238835	0.38835	0.295	0.805941	0.60559	0.279191	0.440824	0.377739	0.872572	0.700419
2513020848	3140001	3150000	0	0	0	0	0.145606	0.143031	0	0	0	0.143098	0	0	0	0.147653	0	0.142732	0.148613	0.144763	0.137114	0	0.146871	0.138472	0	0	0	0	0	0.231834	0.384075	0.322478	0.800155	0.630871	0.279191	0.440824	0.377739	0.872572	0.700419
2513020848	3145001	3155000	0	0	0	0	0.145606	0.143031	0	0	0	0.143098	0	0	0	0.289378	0	0.281747	0.293658	0.144763	0.405467	0	0.146871	0.135996	0	0	0	0	0	0.231093	0.385355	0.33234	0.793005	0.636101	0.279191	0.440824	0.377739	0.872572	0.700419
2513020848	3150001	3160000	0	0	0	0	0.145606	0.143031	0	0	0	0.143098	0	0	0	0.289378	0	0.281747	0.293658	0.144763	0.405467	0	0.146871	0.135996	0	0	0	0	0	0.231303	0.385487	0.33131	0.794023	0.635542	0.279191	0.440824	0.377739	0.872572	0.700419
2513020848	3155001	3165000	0	0	0	0	0	0	0	0	0	0	0	0	0	0.142183	0	0.139188	0.145217	0	0.267944	0	0	0	0	0	0	0	0	0.234342	0.388854	0.322167	0.805393	0.630371	0.279191	0.440824	0.377739	0.872572	0.700419
2513020848	3160001	3170000	0	0	0	0	0	0	0	0	0	0.150553	0	0	0	0	0.151306	0	0	0.151306	0	0	0	0.144358	0	0	0	0	0	0.233636	0.38544	0.313702	0.812	0.624758	0.279191	0.440824	0.377739	0.872572	0.700419
2513020848	3165001	3175000	0	0	0	0	0	0	0	0	0	0.150553	0	0	0	0	0.151306	0	0	0.151306	0	0	0	0.144358	0	0	0	0	0	0.234049	0.385962	0.312927	0.812707	0.624504	0.279191	0.440824	0.377739	0.872572	0.700419
2513020848	3170001	3180000	0	0	0	0	0	0	0	0	0	0.150553	0	0	0	0	0.297987	0	0	0.151306	0.138928	0	0	0.144358	0	0	0	0	0	0.234082	0.38464	0.314461	0.810667	0.626187	0.279191	0.440824	0.377739	0.872572	0.700419
2513020848	3175001	3185000	0	0	0	0	0	0	0	0	0.135849	0	0	0	0	0	0.146956	0	0	0	0.276303	0	0	0	0	0	0	0.134724	0	0.236136	0.385147	0.312832	0.81579	0.625931	0.279191	0.440824	0.377739	0.872572	0.700419
2513020848	3180001	3190000	0	0.145488	0.143404	0	0.293489	0	0	0	0.135849	0	0	0	0	0	0.146956	0	0	0	0.276303	0	0	0	0	0	0	0.134724	0	0.236772	0.381296	0.300512	0.804803	0.610074	0.279191	0.440824	0.377739	0.872572	0.700419
2513020848	3185001	3195000	0	0.145488	0.143404	0	0.293489	0	0	0	0.135849	0	0	0	0	0	0	0	0	0	0.13739	0	0	0	0	0	0	0.134724	0	0.243513	0.376629	0.237612	0.795569	0.519675	0.279191	0.440824	0.377739	0.872572	0.700419
2513020848	3190001	3200000	0	1.69555	3.75075	0	3.46301	0.542543	2.97413	2.80207	2.42279	2.92818	2.87199	2.1195	0.546828	2.95917	3.04448	3.1907	3.17924	2.87534	2.5612	3.04905	3.3911	2.79582	2.85043	3.53249	1.64241	3.8305	3.62095	0.931373	0.291553	0.0060889	0.846396	0.821004	0.93928	0.440824	0.377739	0.875125	0.845926
2513020848	3195001	3205000	0	1.69555	3.6694	0	3.24632	0.708057	2.97413	2.80207	2.42279	2.92818	2.87199	2.1195	0.546828	2.95917	3.04448	3.1907	3.17924	2.87534	2.78555	3.05076	3.56066	2.79582	3.0158	3.53249	1.64241	3.8305	3.6126	0.303797	0.159815	0.542721	0.956293	0.612385	0.330202	0.440824	0.562611	0.961148	0.700419
2513020848	3200001	3210000	0	1.69555	3.6694	0	3.24632	0.708057	2.97413	2.80207	2.42279	2.92818	2.87199	2.1195	0.546828	2.95917	3.04448	3.1907	3.17924	2.87534	2.78555	3.05076	3.56066	2.79582	3.0158	3.53249	1.64241	3.8305	3.63429	0.304609	0.159636	0.541608	0.958311	0.609792	0.330782	0.440824	0.561947	0.961548	0.700419
2513020848	3205001	3215000	0	0.143646	0	0	0	0.136776	0	0	0	0	0	0	0	0	0	0	0	0	0.134763	0	0.140932	0	0.140786	0	0	0	0	0.255312	0.376317	0.310207	0.805569	0.60822	0.282675	0.440824	0.377739	0.872572	0.700419
2513020849	1	10000	0	0	0.748905	0.137647	0.147345	0	0	0	0	0.139884	0.146661	0	0	0.71999	0.428	0.426074	0.878963	0.860013	0.407547	0.811775	0.144615	0.809044	0.70826	0.446837	0	0	0	0.186803	0.356318	0.43001	0.725484	0.648536	0.279191	0.440824	0.45409	0.872572	0.700419
2513020849	5001	15000	0.148755	0	0.285861	0.279332	0.292088	0	0.144105	0	0	0.139884	0.146661	0	0	0.142407	0.145843	0	0.294342	0.289527	0.279603	0.554795	0.146411	0.414601	0.285268	0	0	0	0	0.216243	0.363606	0.317784	0.782432	0.61663	0.279191	0.440824	0.377739	0.872572	0.700419
2513020849	10001	20000	0.148755	0	0.138648	0.279332	0.141652	0	0.144105	0	0	0.139884	0.146661	0	0	0.142407	0.145843	0	0.294342	0.289527	0.136933	0.554795	0.146411	0.414601	0.285268	0	0	0	0	0.218066	0.366288	0.320701	0.789695	0.621817	0.279191	0.440824	0.377739	0.872572	0.700419
2513020849	15001	25000	0.148755	0	0	0.141993	0.141652	0	0.144105	0	0	0	0	0	0	0	0	0	0	0	0	0.276254	0	0.138423	0.142025	0	0	0	0	0.228209	0.378537	0.305739	0.808776	0.610736	0.279191	0.440824	0.377739	0.872572	0.700419
2513020849	20001	30000	0	0	0	0	0	0	0	0	0	0	0	0	0	0	0	0	0	0	0	0	0	0	0	0	0	0	0	0.236051	0.388488	0.309227	0.816099	0.623295	0.279191	0.440824	0.377739	0.872572	0.700419
2513020849	25001	35000	0	0	0	0	0	0	0	0	0	0	0	0	0	0	0	0	0	0	0	0.135975	0	0.139966	0.139188	0	0	0	0	0.236728	0.384102	0.315237	0.816891	0.622891	0.279191	0.440824	0.377739	0.872572	0.700419
2513020849	30001	40000	0	0	0	0.430937	0	0	0	0	0	0	0	0	0	0	0	0	0	0	0	0.135975	0	0.139966	0.139188	0	0	0	0	0.235062	0.38663	0.307825	0.813465	0.61733	0.279191	0.440824	0.377739	0.872572	0.700419
2513020849	35001	45000	0	0	0	0.438986	0	0	0	0	0	0	0	0	0	0	0	0	0	0	0	0.135975	0	0.139966	0.139188	0	0	0	0	0.235199	0.386962	0.30795	0.813865	0.618236	0.279191	0.440824	0.377739	0.872572	0.700419
2513020849	40001	50000	0	0	0	0.44598	0	0	0	0	0	0	0	0	0	0	0	0	0	0	0	0	0	0	0	0	0	0	0	0.234527	0.390094	0.30311	0.812776	0.617537	0.279191	0.440824	0.377739	0.872572	0.700419
2513020849	45001	55000	0	0	0	0	0.290589	0	0	0	0	0	0	0	0	0	0	0	0	0	0	0	0	0.13556	0.141744	0	0	0.132544	0	0.238196	0.385087	0.307737	0.820826	0.616949	0.279191	0.440824	0.377739	0.872572	0.700419
2513020849	50001	60000	0	0	0	0	0.290589	0	0	0	0	0	0	0	0	0	0	0	0	0	0	0	0	0.13556	0.141744	0	0	0.132544	0	0.239114	0.38369	0.307153	0.82278	0.614351	0.279191	0.440824	0.377739	0.872572	0.700419
2513020849	55001	65000	0.165018	0	0	0	0.290589	0	0	0	0	0.149681	0	0.156571	0	0.145567	0	0	0	0.143786	0.136599	0.148012	0	0.279603	0.141744	0	0	0.269995	0.12974	0.222742	0.385194	0.319806	0.823818	0.605564	0.279191	0.440824	0.377739	0.872572	0.700419
2513020849	60001	70000	0.165018	0	0	0	0.14909	0	0	0.151865	0.147258	0.149681	0	0.156571	0	0.145567	0	0.289902	0	0.143786	0.136338	0.289527	0	0.145685	0	0	0	0.135642	0.12893	0.224056	0.388431	0.31827	0.813135	0.622736	0.279191	0.440824	0.377739	0.872572	0.700419
2513020849	65001	75000	0.165018	0	0	0	0.14909	0	0	0.151865	0.147258	0.149681	0	0.156571	0	0.145567	0	0.289902	0	0.143786	0.136338	0.289527	0	0.145685	0	0	0	0.135642	0.12893	0.224279	0.38843	0.318095	0.81319	0.622744	0.279191	0.440824	0.377739	0.872572	0.700419
2513020849	70001	80000	0.31495	0.319362	0.308068	0.319017	0.464458	0.455087	0.319709	0.46547	0.441773	0.286671	0.298963	0.294342	0.297605	0.290053	0.287153	0.718929	0.298864	0.290666	0.414822	0.413155	0.289082	0.2752	0.283242	0.611908	0.308714	0.538743	0.519014	0.241129	0.393832	0.315388	0.828707	0.615299	0.279191	0.440824	0.377739	0.872572	0.700419
2513020849	75001	85000	0.31495	0.319362	0.308068	0.319017	0.464458	0.455087	0.319709	0.31045	0.294602	0.286671	0.298963	0.294342	0.297605	0.290053	0.287153	0.431147	0.298864	0.290666	0.414822	0.275342	0.289082	0.2752	0.283242	0.611908	0.308714	0.538743	0.519014	0.23782	0.393229	0.312923	0.829216	0.609233	0.279191	0.440824	0.377739	0.872572	0.700419
2513020849	80001	90000	0.31495	0.319362	0.308068	0.319017	0.464458	0.455087	0.319709	0.31045	0.294602	0.286671	0.298963	0.294342	0.297605	0.290053	0.287153	0.431147	0.298864	0.290666	0.414822	0.275342	0.289082	0.2752	0.283242	0.611908	0.308714	0.538743	0.519014	0.237558	0.392538	0.314286	0.828205	0.612098	0.279191	0.440824	0.377739	0.872572	0.700419
2513020849	85001	95000	0	0	0	0	0.15578	0	0	0	0	0	0	0	0	0	0	0	0	0	0	0	0	0	0	0	0	0	0	0.235428	0.388488	0.308827	0.81642	0.62274	0.279191	0.440824	0.377739	0.872572	0.700419
2513020849	90001	100000	0	0	0	0	0	0	0	0	0	0	0	0	0	0	0	0	0	0	0	0	0	0	0	0	0	0	0	0.236051	0.388488	0.311687	0.817237	0.624379	0.279191	0.440824	0.377739	0.872572	0.700419
2513020849	95001	105000	0	0	0	0	0	0	0.144763	0	0	0	0	0	0	0	0	0	0	0	0.14016	0	0	0	0	0	0	0	0.13022	0.238513	0.384077	0.313689	0.82378	0.618968	0.279191	0.440824	0.377739	0.872572	0.700419
2513020849	100001	110000	0	0	0	0	0	0	0.144763	0	0	0	0	0	0	0.151417	0	0	0	0	0.14016	0	0	0	0	0	0	0	0.133327	0.232642	0.382102	0.316917	0.819418	0.622488	0.279191	0.440824	0.377739	0.872572	0.700419
2513020849	105001	115000	0	0	0	0	0	0	0.144763	0	0.135356	0	0	0	0	0.151417	0	0.141079	0	0.146329	0.414601	0.139639	0.144141	0.275153	0	0	0	0	0.133327	0.232205	0.377749	0.326538	0.813524	0.630037	0.279191	0.440824	0.377739	0.872572	0.700419
2513020849	110001	120000	0	0	0.145488	0.14047	0	0	0	0	0.135356	0	0	0	0	0.151417	0	0.141079	0	0.146329	0.274595	0.278691	0.291055	0.275153	0	0	0	0	0	0.22777	0.378439	0.3235	0.799992	0.629199	0.279191	0.440824	0.377739	0.872572	0.700419
2513020849	115001	125000	0	0	0.140328	0.142246	0	0	0	0	0.135356	0	0	0	0	0	0	0.141079	0	0.146329	0.274595	0.278375	0.291055	0.275153	0	0	0	0	0	0.233433	0.380983	0.319418	0.806577	0.625276	0.279191	0.440824	0.377739	0.872572	0.700419
2513020849	120001	130000	0	0	0.140328	0.142246	0	0	0	0	0	0	0.149383	0	0	0	0	0	0	0.146829	0.138054	0.280376	0.147042	0.138699	0	0	0	0	0	0.226252	0.378037	0.313212	0.807418	0.621565	0.279191	0.440824	0.377739	0.872572	0.700419
2513020849	125001	135000	0	0	0.141868	0	0	0	0	0	0	0	0.149383	0	0	0	0	0	0	0.146829	0.279767	0.141408	0	0.138699	0	0	0	0	0	0.230241	0.381327	0.312725	0.810462	0.624305	0.279191	0.440824	0.377739	0.872572	0.700419
2513020849	130001	140000	0	0	0.141868	0	0	0	0	0	0	0	0.149383	0	0	0	0	0	0	0.146829	0.279767	0.139319	0	0.137297	0	0	0	0	0	0.230325	0.381448	0.312637	0.810533	0.62429	0.279191	0.440824	0.377739	0.872572	0.700419
2513020849	135001	145000	0	0	0.141868	0	0	0	0	0	0	0	0	0	0	0.144105	0.142931	0.140903	0	0.142536	0.275818	0.136821	0	0.136446	0	0	0	0	0	0.227546	0.383034	0.320026	0.800574	0.630303	0.279191	0.440824	0.377739	0.872572	0.700419
2513020849	140001	150000	0	0	0	0	0	0	0	0	0	0	0	0	0	0.144105	0.142931	0.140903	0	0.142536	0.13753	0.136821	0	0.136446	0	0	0	0	0	0.222668	0.381292	0.327184	0.797132	0.638281	0.279191	0.440824	0.377739	0.872572	0.700419
2513020849	145001	155000	0	0	0	0	0	0	0	0	0	0	0	0	0	0.144105	0.142931	0.140903	0	0.142536	0.13753	0.136166	0	0.13691	0	0	0	0	0	0.216392	0.37784	0.336209	0.787715	0.6456	0.279191	0.440824	0.378281	0.872572	0.700419
2513020849	150001	160000	0	0	0	0.44336	0	0	0	0	0	0	0	0	0	0	0	0	0	0	0	0	0	0	0	0	0	0	0	0.233203	0.391647	0.296392	0.809863	0.61144	0.279191	0.440824	0.377739	0.872572	0.700419
2513020849	155001	165000	0	0	0	0.44336	0	0	0	0	0	0	0	0	0	0	0	0	0	0	0	0	0	0	0	0	0	0	0	0.234317	0.390329	0.301511	0.812376	0.616203	0.279191	0.440824	0.377739	0.872572	0.700419
2513020849	160001	170000	0	0	0	0.44336	0	0	0	0	0	0	0	0	0	0	0	0	0	0	0	0	0	0	0	0	0	0	0	0.234507	0.390116	0.302371	0.812795	0.616998	0.279191	0.440824	0.377739	0.872572	0.700419
2513020849	165001	175000	0	0	0	0	0	0	0	0	0	0	0	0	0	0	0	0	0	0	0	0	0	0	0	0	0	0	0	0.236051	0.388488	0.309227	0.816099	0.623295	0.279191	0.440824	0.377739	0.872572	0.700419
2513020849	170001	180000	0	0	0	0.145567	0	0	0	0	0	0	0	0	0	0	0	0	0	0	0	0	0	0	0	0	0	0	0	0.235463	0.389087	0.306641	0.814859	0.620929	0.279191	0.440824	0.377739	0.872572	0.700419
2513020849	175001	185000	0.652304	0.641186	0.326358	0.819581	0.625409	0.611908	0.648291	0.639419	0.610001	0.578164	0.610001	0.601794	0.602213	0.594452	0.589728	0.580564	0.597926	0.587147	0.554592	0.559425	0.583693	0.552802	0.568351	0.605446	0.612393	0.2622	0.50831	0.234633	0.389492	0.298451	0.803357	0.634195	0.279191	0.440824	0.377739	0.872572	0.700419
2513020849	180001	190000	0.652304	0.641186	0.326358	0.819581	0.625409	0.611908	0.648291	0.639419	0.610001	0.578164	0.610001	0.601794	0.602213	0.594452	0.589728	0.580564	0.597926	0.587147	0.554592	0.559425	0.583693	0.552802	0.568351	0.605446	0.612393	0.2622	0.50831	0.234244	0.38978	0.295507	0.799742	0.637266	0.279191	0.440824	0.377739	0.872572	0.700419
2513020849	185001	195000	0.652304	0.641186	0.326358	0.655665	0.625409	0.611908	0.648291	0.639419	0.610001	0.578164	0.610001	0.601794	0.602213	0.594452	0.589728	0.580564	0.597926	0.587147	0.554592	0.559425	0.583693	0.552802	0.568351	0.605446	0.612393	0.2622	0.50831	0.235139	0.388889	0.299886	0.802791	0.639071	0.279191	0.440824	0.377739	0.872572	0.700419
2513020849	190001	200000	0	0	0	0	0	0	0	0	0	0	0	0	0	0	0	0	0	0	0	0	0	0	0	0	0	0	0	0.236051	0.388488	0.309227	0.816099	0.623295	0.279191	0.440824	0.377739	0.872572	0.700419
2513020849	195001	205000	0	0	0	0	0	0	0	0	0	0	0	0	0	0	0	0	0	0	0	0	0	0	0	0	0	0	0	0.236051	0.388488	0.310049	0.816005	0.623868	0.279191	0.440824	0.377739	0.872572	0.700419
2513020849	200001	210000	0	0	0	0	0	0	0	0	0	0	0	0	0	0	0	0	0	0	0	0	0	0.137068	0	0	0	0	0	0.237828	0.385994	0.312489	0.81657	0.623693	0.279191	0.440824	0.377739	0.872572	0.700419
2513020849	205001	215000	0	0	0	0	0	0	0	0	0	0.146247	0	0	0	0	0	0	0	0	0	0	0	0.137068	0	0	0	0	0	0.239393	0.386261	0.310549	0.814539	0.622533	0.279191	0.440824	0.377739	0.872572	0.700419
2513020849	210001	220000	0	0	0	0	0	0	0	0	0	0.146247	0	0	0	0	0	0	0	0	0	0	0	0.137068	0	0	0	0	0	0.238736	0.386688	0.316334	0.813907	0.62225	0.279191	0.440824	0.377739	0.872572	0.700419
2513020849	215001	225000	0	0	0	0	0	0	0	0	0	0.146247	0	0	0	0.147085	0	0	0.149631	0	0.138547	0.139032	0	0.139666	0	0	0	0	0	0.231685	0.384184	0.325139	0.808163	0.628704	0.279191	0.440824	0.377739	0.872572	0.700419
2513020849	220001	230000	0	0	0	0	0	0	0	0	0	0	0	0	0	0.147085	0	0	0.149631	0	0.138547	0.139032	0	0.139666	0	0	0	0	0	0.231554	0.383878	0.325654	0.809923	0.628997	0.279191	0.440824	0.377739	0.872572	0.700419
2513020849	225001	235000	0.156719	0	0	0	0.148241	0.143751	0	0.151472	0	0	0.154098	0.153159	0	0.147085	0	0	0.448892	0.150086	0.415869	0.283059	0	0.283799	0.149631	0	0	0	0.131055	0.227199	0.370833	0.33292	0.809434	0.627211	0.279191	0.440824	0.377739	0.872572	0.700419
2513020849	230001	240000	0.156719	0	0	0	0.148241	0.143751	0	0.151472	0	0	0.154098	0.153159	0	0	0	0	0.305713	0.150086	0.281688	0.144541	0	0.144504	0.149631	0	0	0	0.131055	0.232448	0.375037	0.319395	0.817279	0.620387	0.279191	0.440824	0.377739	0.872572	0.700419
2513020849	235001	245000	0.156719	0	0	0	0.148241	0.143751	0	0.151472	0	0	0.154098	0.153159	0	0	0	0	0.305713	0.150086	0.281688	0.144541	0	0.144504	0.149631	0	0	0	0.131055	0.232346	0.374657	0.319632	0.817285	0.620322	0.279191	0.440824	0.377739	0.872572	0.700419
2513020849	240001	250000	0	0	0	0	0	0	0	0	0	0	0	0	0	0	0	0	0	0	0	0	0	0	0	0	0	0	0	0.236051	0.388488	0.310178	0.817503	0.623251	0.279191	0.440824	0.377739	0.872572	0.700419
2513020849	245001	255000	0	0	0	0	0	0	0	0	0	0.142732	0	0	0	0	0	0.141109	0.14637	0	0	0	0	0.140021	0	0	0	0	0	0.242533	0.391203	0.315164	0.808798	0.627255	0.279191	0.440824	0.377739	0.872572	0.700419
2513020849	250001	260000	0	0	0	0	0	0	0	0.143473	0	0.141499	0	0	0	0	0	0.142246	0.14637	0	0	0	0	0.275867	0	0	0	0	0	0.247809	0.380623	0.31419	0.810934	0.628566	0.279191	0.440824	0.377739	0.872572	0.700419
2513020849	255001	265000	0	0	0	0	0	0	0	0.143473	0	0.141499	0	0	0	0	0	0.142246	0.14637	0	0	0	0	0.275867	0	0	0	0	0	0.246594	0.381407	0.312533	0.80992	0.628097	0.279191	0.440824	0.377739	0.872572	0.700419
2513020849	260001	270000	0	0	0	0	0	0.13779	0	0.143473	0	0	0	0	0	0	0	0	0	0	0.138954	0	0.15098	0.136102	0	0	0	0	0	0.24379	0.376322	0.310928	0.816072	0.625511	0.279191	0.440824	0.377739	0.872572	0.700419
2513020849	265001	275000	0	0	0	0	0	0.13779	0	0	0	0	0	0	0	0	0	0	0	0	0.142342	0	0.15098	0	0	0.152857	0	0	0	0.23812	0.387943	0.314073	0.81411	0.624882	0.279191	0.440824	0.377739	0.872572	0.700419
2513020849	270001	280000	0.148195	0	0	0	0	0.13779	0.141408	0	0	0	0.148566	0	0	0	0	0	0	0	0.142342	0.141168	0.15098	0	0	0.152857	0	0	0	0.230839	0.379697	0.312629	0.808022	0.619495	0.279191	0.440824	0.377739	0.872572	0.700419
2513020849	275001	285000	0.148195	0	0	0	0	0	0.141408	0	0	0	0.148566	0	0	0.143927	0	0	0	0	0	0.285861	0	0	0	0.152857	0	0	0	0.220312	0.382682	0.313886	0.805662	0.62326	0.279191	0.440824	0.377739	0.872572	0.700419
2513020849	280001	290000	0.148195	0	0	0.569627	0	0	0.141408	0	0	0	0.148566	0	0	0.143927	0	0	0	0	0	0.285861	0	0	0	0	0	0	0	0.222936	0.383727	0.302019	0.803939	0.614732	0.279191	0.440824	0.377739	0.872572	0.700419
2513020849	285001	295000	0	0	0	0.712033	0	0	0	0	0	0	0	0	0	0.143927	0	0	0	0	0.135662	0.140188	0	0	0	0	0	0	0	0.228142	0.38869	0.306467	0.806792	0.616053	0.279191	0.440824	0.377739	0.872572	0.700419
2513020849	290001	300000	0	0	0	0.712033	0	0	0	0	0	0	0	0	0	0	0	0	0	0	0.136446	0	0	0	0	0	0	0	0	0.233419	0.390833	0.301945	0.809145	0.610192	0.279191	0.440824	0.377739	0.872572	0.700419
2513020849	295001	305000	0	0	0	0.142246	0	0	0	0	0	0	0	0	0	0	0	0	0	0	0.136446	0	0	0	0	0	0	0	0	0.235776	0.388263	0.311993	0.814584	0.620386	0.279191	0.440824	0.377739	0.872572	0.700419
2513020849	300001	310000	0	0	0	0.477758	0	0	0	0	0	0	0	0	0	0	0	0	0	0	0	0	0	0	0	0	0	0	0	0.234479	0.390148	0.302243	0.812733	0.61688	0.279191	0.440824	0.377739	0.872572	0.700419
2513020849	305001	315000	0	0	0	0.477758	0	0	0	0	0	0	0	0	0	0	0	0	0	0	0	0	0	0	0	0	0	0	0	0.234532	0.390089	0.302481	0.812848	0.617101	0.279191	0.440824	0.377739	0.872572	0.700419
2513020849	310001	320000	0	0	0	0.477758	0	0	0	0	0	0	0	0	0	0	0	0	0	0	0	0	0	0	0	0	0	0	0	0.23347	0.391321	0.303172	0.811386	0.609864	0.279191	0.440824	0.377739	0.872572	0.700419
2513020849	315001	325000	0	0	0	0	0	0	0.140757	0.142897	0	0.140699	0	0	0	0	0	0.142151	0	0.144467	0.13623	0.138623	0	0	0	0	0	0.13338	0	0.230948	0.379267	0.326671	0.81752	0.620619	0.279191	0.440824	0.377739	0.872572	0.700419
2513020849	320001	330000	0	0	0	0	0	0	0.140757	0.142897	0	0.140699	0	0	0	0	0	0.142151	0	0.288426	0.13623	0.138623	0	0.137068	0.142931	0	0	0.13338	0	0.229365	0.375696	0.330271	0.81629	0.621561	0.279191	0.440824	0.377739	0.872572	0.700419
2513020849	325001	335000	0	0	0	0	0	0	0.140757	0.142897	0	0.140699	0	0	0	0	0	0.142151	0	0.288426	0.13623	0.138623	0	0.137068	0.142931	0	0	0.13338	0	0.229975	0.376868	0.323521	0.815936	0.62421	0.279191	0.440824	0.377739	0.872572	0.700419
2513020849	330001	340000	0	0	0.170562	0	0	0	0	0	0	0	0	0	0.15462	0	0.150292	0	0	0.449042	0	0.145027	0	0.28094	0.142931	0	0	0	0	0.219659	0.380095	0.33142	0.809638	0.640033	0.279191	0.440824	0.377739	0.872572	0.700419
2513020849	335001	345000	0	0	0.170562	0	0	0	0	0	0	0	0	0	0.15462	0	0.150292	0	0	0.301637	0	0.145027	0	0.143962	0	0	0	0	0	0.220636	0.385434	0.325802	0.809294	0.641426	0.279191	0.440824	0.377739	0.872572	0.700419
2513020849	340001	350000	0	0	0.170562	0	0	0	0	0	0	0	0	0	0.15462	0	0.150292	0	0	0.301637	0	0.145027	0	0.143962	0	0	0	0	0	0.212185	0.383773	0.335709	0.805433	0.65196	0.279191	0.440824	0.378281	0.872572	0.700543
2513020849	345001	355000	0	0	0	0	0	0	0	0	0	0	0	0	0	0	0	0	0	0	0	0	0	0	0	0	0	0	0	0.236051	0.388488	0.309227	0.816099	0.623295	0.279191	0.440824	0.377739	0.872572	0.700419
2513020849	350001	360000	0	0	0	0	0	0	0	0	0	0	0.146871	0	0	0.144989	0	0	0	0	0.138373	0	0	0	0	0	0	0	0	0.225031	0.379176	0.321562	0.806319	0.631458	0.279191	0.440824	0.377739	0.872572	0.700419
2513020849	355001	365000	0.974808	0.994959	0	1.00996	0.960711	0.921548	0.973025	0.953501	0.908833	0.873635	1.04989	0.911189	0.90269	1.06266	0.892244	0.882767	0.930126	0.906528	0.981511	0.853479	0.902064	0.841463	0.87223	0.953003	0.918589	0.822547	0.797377	0.21875	0.380745	0.336435	0.812366	0.697272	0.279191	0.440824	0.378281	0.872572	0.737039
2513020849	360001	370000	0.974808	0.994959	0	1.00996	0.960711	0.921548	0.973025	0.953501	0.908833	0.873635	1.04989	0.911189	0.90269	1.06266	0.892244	0.882767	0.930126	0.906528	0.981511	0.853479	0.902064	0.841463	0.87223	0.953003	0.918589	0.822547	0.797377	0.203301	0.37376	0.366843	0.811093	0.767312	0.279191	0.440824	0.399459	0.872572	0.79822
2513020849	365001	375000	1.13589	1.16079	0.157398	1.00996	1.12021	1.07427	0.973025	1.11184	0.908833	0.873635	0.899902	0.911189	0.90269	0.911189	0.892244	0.882767	0.930126	1.058	0.98309	0.996622	0.902064	0.841463	0.87223	0.953003	0.918589	0.822547	0.797683	0.207317	0.356842	0.288055	0.778829	0.655247	0.279191	0.440824	0.377739	0.872572	0.701605
2513020849	370001	380000	0.161685	0.159855	0.157398	0	0.158182	0.150344	0	0.157018	0	0	0	0	0	0	0	0	0	0.152857	0.14102	0.14541	0	0	0	0	0	0	0	0.222296	0.36765	0.287644	0.789573	0.595306	0.279191	0.440824	0.377739	0.872572	0.700419
2513020849	375001	385000	0.161685	0.154686	0.157398	0	0.158182	0.150344	0	0.157018	0	0	0	0	0	0	0	0	0	0.152857	0.14102	0.14541	0	0	0	0	0	0	0	0.225359	0.372447	0.292724	0.79607	0.602094	0.279191	0.440824	0.377739	0.872572	0.700419
2513020849	380001	390000	0	0	0	0	0	0	0	0	0	0	0	0	0	0	0	0	0	0	0	0	0	0	0	0	0	0	0	0.236051	0.388488	0.309227	0.816099	0.623295	0.279191	0.440824	0.377739	0.872572	0.700419
2513020849	385001	395000	0	0	0	0	0	0	0	0	0	0	0	0	0	0	0	0	0	0	0	0	0	0	0	0	0	0	0	0.236051	0.388488	0.309227	0.816099	0.623295	0.279191	0.440824	0.377739	0.872572	0.700419
2513020849	390001	400000	0	0	0	0	0	0	0	0	0	0	0	0	0	0	0	0	0	0	0	0	0	0	0	0	0	0	0	0.236051	0.388488	0.309227	0.816099	0.623295	0.279191	0.440824	0.377739	0.872572	0.700419
2513020849	395001	405000	0.150189	0.149731	0	0	0.145256	0.139452	0.144177	0	0.138522	0.14156	0.145488	0	0.146661	0.145027	0.140498	0.139425	0.145645	0.142765	0	0.135601	0	0.135478	0.14067	0.148333	0.148195	0	0.12655	0.232151	0.387991	0.320093	0.813048	0.624529	0.279191	0.440824	0.377739	0.872572	0.700419
2513020849	400001	410000	0.150189	0.149731	0	0	0.145256	0.139452	0.144177	0	0.138522	0.14156	0.145488	0	0.146661	0.145027	0.140498	0.139425	0.145645	0.142765	0	0.135601	0	0.135478	0.14067	0.148333	0.148195	0	0.12655	0.232595	0.388046	0.318824	0.813396	0.624382	0.279191	0.440824	0.377739	0.872572	0.700419
2513020849	405001	415000	0.150189	0.149731	0	0	0.145256	0.139452	0.144177	0	0.138522	0.14156	0.145488	0	0.146661	0.145027	0.140498	0.139425	0.145645	0.142765	0	0.135601	0	0.135478	0.14067	0.148333	0.148195	0	0.12655	0.231977	0.38797	0.320593	0.812911	0.624588	0.279191	0.440824	0.377739	0.872572	0.700419
2513020849	410001	420000	0.169555	0.170125	0.333829	0.175865	0.484769	0	0.327406	0.324539	0	0.151583	0.154886	0.160476	0.158834	0.156868	0.153591	0	0	0.458931	0.588684	0.877973	0.158182	0.884593	0.298766	0.166791	0	0.141713	0.137813	0.205551	0.33348	0.331707	0.793186	0.613684	0.279191	0.440824	0.377739	0.872572	0.700419
2513020849	415001	425000	0.169555	0.170125	0.333829	0.175865	0.484769	0	0.327406	0.324539	0	0.151583	0.154886	0.160476	0.158834	0.156868	0.153591	0	0	0.458931	0.588684	0.877973	0.158182	0.884593	0.298766	0.166791	0	0.141713	0.137813	0.204539	0.3316	0.332572	0.792101	0.613321	0.279191	0.440824	0.377739	0.872572	0.700419
2513020849	420001	430000	0.169555	0.170125	0.333829	0.175865	0.484769	0	0.327406	0.324539	0	0.151583	0.154886	0.160476	0.158834	0.156868	0.153591	0	0	0.458931	0.588684	0.877973	0.158182	0.884593	0.298766	0.166791	0	0.141713	0.137813	0.213246	0.347571	0.325317	0.800666	0.616381	0.279191	0.440824	0.377739	0.872572	0.700419
2513020849	425001	435000	0	0	0	0	0	0	0	0	0	0	0	0	0	0	0	0	0	0	0	0	0	0	0	0	0	0	0	0.236051	0.388488	0.309227	0.816099	0.623295	0.279191	0.440824	0.377739	0.872572	0.700419
2513020849	430001	440000	0	0	0	0	0	0	0	0	0	0	0	0	0	0	0	0	0	0	0	0.136754	0	0	0	0	0	0	0	0.233628	0.387641	0.310869	0.815516	0.623823	0.279191	0.440824	0.377739	0.872572	0.700419
2513020849	435001	445000	0.158505	0	0	0	0	0.142471	0	0	0	0	0	0	0	0	0	0.14866	0	0	0.281054	0.277095	0	0	0	0	0	0.140413	0	0.229955	0.385715	0.320589	0.809392	0.616862	0.279191	0.440824	0.377739	0.872572	0.700419
2513020849	440001	450000	0.158505	0	0	0	0	0.142471	0	0	0	0	0	0	0	0	0	0.14866	0	0	0.281054	0.277095	0	0	0	0	0	0.140413	0	0.228663	0.385131	0.323111	0.807937	0.615474	0.279191	0.440824	0.377739	0.872572	0.700419
2513020849	445001	455000	0.158505	0	0	0	0	0.142997	0	0	0	0	0	0	0	0	0	0.14866	0	0	0.281054	0.140584	0	0	0	0	0	0.140413	0	0.230267	0.385333	0.326266	0.805309	0.610659	0.279191	0.440824	0.377739	0.872572	0.700419
2513020849	450001	460000	0	0	0	0	0	0	0.148426	0	0	0	0	0	0	0	0	0	0	0.148473	0	0.139829	0	0	0	0	0	0	0	0.226517	0.383145	0.310718	0.813562	0.626154	0.279191	0.440824	0.377739	0.872572	0.700419
2513020849	455001	465000	0	0	0	0	0	0	0.148426	0	0	0	0	0	0	0	0	0	0	0.148473	0	0.139829	0	0	0	0	0	0	0	0.225761	0.382718	0.310841	0.813353	0.626387	0.279191	0.440824	0.377739	0.872572	0.700419
2513020849	460001	470000	0	0	0	0	0	0	0.148426	0	0	0.145527	0	0	0	0	0	0	0	0.148473	0.140498	0.139829	0	0.142278	0	0	0	0	0	0.226788	0.377273	0.312104	0.811708	0.629414	0.279191	0.440824	0.377739	0.872572	0.700419
2513020849	465001	475000	0	0	0	0	0	0	0	0	0	0.145527	0	0	0	0	0.143335	0	0	0	0.141168	0	0	0.139505	0	0	0	0	0	0.314602	0.28331	0.411927	0.712466	0.765013	0.339154	0.440824	0.438503	0.872572	0.797224
2513020849	470001	480000	0	0	0	0	0	0	0	0	0	0.145527	0	0	0	0	0.143335	0	0.147301	0	0.141168	0	0	0.139505	0	0	0	0	0	0.462029	0.432572	0.3587	0.555308	0.676294	0.486605	0.465009	0.392751	0.872572	0.718789
2513020849	475001	485000	0	0	0	0	0	0	0	0	0	0	0	0	0	0	0.143335	0	0.147301	0	0	0	0	0	0	0	0	0	0	0.836174	0.443733	0.235152	0.48317	0.633511	0.849764	0.474114	0.377739	0.872572	0.700419
2513020849	480001	490000	0	0	0	0	0	0	0	0	0	0	0	0	0	0	0	0	0.147301	0	0	0	0	0	0	0	0	0	0	0.65757	NA	0.408659	0.576736	0.887141	0.678708	NA	0.436196	0.872572	0.90002
2513020849	485001	495000	0	0	0	0	0	0	0	0	0	0	0.149984	0	0	0.152678	0.151583	0	0	0	0	0.143856	0	0.285662	0.148103	0	0	0	0	0.589588	0.139949	0.0629661	0.150563	0.155553	0.613336	0.440824	0.377739	0.872572	0.700419
2513020849	490001	500000	0	0	0	0	0	0	0	0	0	0	0.149984	0	0	0.152678	0.151583	0	0	0	0	0.143856	0	0.285662	0.148103	0	0	0	0	0.216057	0.323551	0.383973	0.784661	0.65554	0.279191	0.440824	0.415446	0.872572	0.701605
2513020849	495001	505000	0	0	0	0	0	0	0	0	0	0	0.149984	0	0	0.152678	0.151583	0	0	0	0	0.143856	0	0.285662	0.148103	0	0	0	0	0.228	0.362816	0.335916	0.806064	0.636644	0.279191	0.440824	0.378281	0.872572	0.700419
2513020849	500001	510000	0	0	0.153843	0	0.153281	0	0	0	0	0	0	0	0	0.15098	0	0	0	0	0.140244	0	0	0.140932	0.145606	0	0	0	0	0.233294	0.380985	0.314474	0.806806	0.620133	0.279191	0.440824	0.377739	0.872572	0.700419
2513020849	505001	515000	0	0	0.153843	0	0.153281	0	0	0	0	0	0	0	0	0.15098	0	0	0	0	0.140244	0.137228	0	0.276499	0.145606	0	0	0	0	0.231183	0.376099	0.321806	0.80712	0.620336	0.279191	0.440824	0.377739	0.872572	0.700419
2513020849	510001	520000	0	0	0.153843	0	0.153281	0	0	0	0	0	0	0	0	0.15098	0	0	0	0	0.274411	0.137228	0	0.276499	0.285007	0	0	0	0	0.234766	0.376299	0.323776	0.808525	0.621231	0.279191	0.440824	0.377739	0.872572	0.700419
2513020849	515001	525000	0.157708	0	0	0.143962	0	0	0	0	0	0	0	0	0	0	0	0	0	0	0.277448	0.137228	0	0.135996	0.139911	0	0	0	0	0.232795	0.380733	0.315582	0.808587	0.614726	0.279191	0.440824	0.377739	0.872572	0.700419
2513020849	520001	530000	0.157708	0	0	0.143962	0	0	0	0	0	0	0	0	0	0	0	0	0	0	0.413945	0.278428	0.146494	0.139319	0.139911	0	0	0	0	0.231867	0.375998	0.324157	0.804863	0.616273	0.279191	0.440824	0.377739	0.872572	0.700419
2513020849	525001	535000	0.157708	0	0	0.143962	0	0	0	0	0	0	0	0	0	0	0	0	0	0	0.281572	0.278428	0.146494	0.139319	0	0	0	0	0	0.219383	0.364806	0.334088	0.788676	0.60527	0.279191	0.440824	0.377739	0.872572	0.700419
2513020849	530001	540000	0	0	0	0	0	0	0	0	0	0	0	0	0	0	0	0	0	0	0.137982	0.278428	0.146494	0.139319	0	0	0	0	0	0.229431	0.365458	0.351655	0.808025	0.630811	0.279191	0.440824	0.386417	0.872572	0.700419
2513020849	535001	545000	0	0	0	0	0.145567	0	0	0	0	0	0	0	0	0	0	0	0	0	0	0	0.144615	0.13691	0	0	0	0	0	0.243674	0.379731	0.32399	0.815907	0.612546	0.279191	0.440824	0.377739	0.872572	0.700419
2513020849	540001	550000	0.470828	0	0.588684	0	0.293828	0.422533	0.592779	0.439482	0.13898	0.423863	0.290899	0.290129	0.289827	0.434966	0.428394	0.42158	0.581178	0.575003	0.538666	0.684104	0.580564	0.68115	0.278115	0	0.301852	0.397188	0.380611	0.224913	0.352814	0.336965	0.800745	0.631196	0.279191	0.440824	0.378281	0.872572	0.700419
2513020849	545001	555000	0.621173	0	0.739158	0.145606	0.441126	0.422533	0.740061	0.439482	0.277703	0.566731	0.436582	0.290129	0.289827	0.434966	0.428394	0.42158	0.732056	0.718753	0.678829	0.684104	0.728621	0.817897	0.278115	0	0.301852	0.397188	0.380611	0.222247	0.348977	0.325169	0.79167	0.623539	0.279191	0.440824	0.377739	0.872572	0.700419
2513020849	550001	560000	0.621173	0	0.739158	0.145606	0.294256	0.422533	0.740061	0.439482	0.277703	0.566731	0.436582	0.290129	0.289827	0.434966	0.428394	0.42158	0.732056	0.718753	0.678829	0.684104	0.583055	0.68115	0.278115	0	0.301852	0.397188	0.380611	0.220756	0.354128	0.319393	0.79362	0.626949	0.279191	0.440824	0.377739	0.872572	0.700419
2513020849	555001	565000	0.153843	0	0.149383	0.145606	0.150344	0	0.144467	0	0.138851	0.14752	0.152797	0	0	0	0	0	0.15564	0.151979	0.140844	0	0.15098	0.143335	0	0	0	0	0	0.23189	0.379874	0.303024	0.806051	0.617614	0.279191	0.440824	0.377739	0.872572	0.700419
2513020849	560001	570000	0	0	0	0	0	0	0	0	0	0	0	0	0	0	0	0	0	0	0	0	0	0	0	0	0	0	0	0.236051	0.388488	0.309227	0.816099	0.623295	0.279191	0.440824	0.377739	0.872572	0.700419
2513020849	565001	575000	0	0	0	0	0	0	0.150606	0	0	0	0	0	0	0.148333	0	0	0.149984	0.148149	0.139939	0	0	0.139478	0.143166	0	0	0	0	0.231221	0.380694	0.317431	0.808772	0.629818	0.279191	0.440824	0.377739	0.872572	0.700419
2513020849	570001	580000	0	0	0	0	0	0	0.150606	0	0	0	0	0	0	0.148333	0	0	0.149984	0.148149	0.139939	0	0	0.139478	0.143166	0	0	0	0	0.228012	0.375482	0.323107	0.803661	0.634273	0.279191	0.440824	0.377739	0.872572	0.700419
2513020849	575001	585000	0	0	0	0	0	0	0.150606	0	0	0	0	0	0	0.148333	0	0	0.149984	0.148149	0.139939	0	0	0.139478	0.143166	0	0	0	0	0.227745	0.375048	0.323588	0.803227	0.634648	0.279191	0.440824	0.377739	0.872572	0.700419
2513020849	580001	590000	0	0	0.147345	0.726087	0	0	0	0	0	0	0	0	0	0	0	0	0	0	0.682122	0	0	0	0	0	0	0	0	0.233804	0.387008	0.296439	0.786841	0.602078	0.279191	0.440824	0.377739	0.872572	0.700419
2513020849	585001	595000	0	0	0.147345	0.726087	0	0	0	0	0	0	0	0	0	0	0	0	0	0	0.682122	0	0	0	0	0	0	0	0	0.234124	0.387156	0.299123	0.793542	0.606667	0.279191	0.440824	0.377739	0.872572	0.700419
2513020849	590001	600000	0	0	0.147345	0.726087	0	0	0	0	0	0	0	0	0	0	0	0	0	0	0.682122	0	0	0	0	0	0	0	0	0.234019	0.387102	0.298323	0.791582	0.605308	0.279191	0.440824	0.377739	0.872572	0.700419
2513020849	595001	605000	0	0.153281	0.149731	0.146044	0.147608	0	0.148149	0	0	0	0.15322	0	0	0	0.148333	0	0	0.149781	0.142183	0	0.153098	0	0	0	0	0	0	0.232379	0.377752	0.302514	0.801413	0.614822	0.279191	0.440824	0.377739	0.872572	0.700419
2513020849	600001	610000	0	0.153281	0.149731	0.146044	0.147608	0	0.148149	0	0	0	0.15322	0	0	0	0.148333	0	0	0.149781	0.142183	0	0.153098	0.146577	0	0	0	0	0	0.234403	0.377435	0.305414	0.804232	0.615895	0.279191	0.440824	0.377739	0.872572	0.700419
2513020849	605001	615000	0	0.153281	0.149731	0.146044	0.147608	0	0.148149	0	0	0	0.15322	0	0	0	0.148333	0.143473	0	0.295934	0.281514	0	0.153098	0.289527	0	0	0	0	0	0.232023	0.375697	0.316923	0.798367	0.617842	0.279191	0.440824	0.377739	0.872572	0.700419
2513020849	610001	620000	0	0	0	0	0	0	0	0	0	0	0	0	0	0.152977	0.145724	0.143473	0	0.146329	0.139425	0	0	0.433733	0	0	0	0	0	0.231883	0.380539	0.327102	0.805175	0.630758	0.279191	0.440824	0.377739	0.872572	0.700419
2513020849	615001	625000	0	0	0	0	0	0	0	0	0	0	0	0	0	0.152977	0.145724	0.143473	0	0.146329	0.139425	0	0	0.287712	0	0	0	0	0	0.230714	0.38266	0.324674	0.805208	0.630723	0.279191	0.440824	0.377739	0.872572	0.700419
2513020849	620001	630000	0	0	0	0	0.149285	0	0	0	0	0	0	0	0	0.152977	0.145724	0	0	0	0	0	0	0.144578	0	0	0	0	0	0.232104	0.383677	0.311982	0.808921	0.627069	0.279191	0.440824	0.377739	0.872572	0.700419
2513020849	625001	635000	0	0	0	0	0.149285	0	0	0	0	0	0	0	0	0	0.14102	0	0	0	0	0	0	0	0	0	0	0	0	0.234955	0.386321	0.308402	0.812034	0.624353	0.279191	0.440824	0.377739	0.872572	0.700419
2513020849	630001	640000	0	0	0	0	0.149285	0	0	0	0	0.143998	0	0	0	0	0.286876	0	0	0	0.139639	0	0	0	0.151362	0	0	0	0	0.238436	0.377478	0.312551	0.80166	0.63225	0.279191	0.440824	0.377739	0.872572	0.700419
2513020849	635001	645000	0	0	0	0	0	0	0	0	0	0.143998	0	0	0	0	0.286876	0	0	0	0.139639	0	0	0	0.151362	0	0	0	0	0.239358	0.378637	0.316812	0.804434	0.633991	0.279191	0.440824	0.377739	0.872572	0.700419
2513020849	640001	650000	0	0	0	0	0	0	0	0	0	0.143998	0	0	0	0	0.146288	0	0	0	0.139639	0	0	0	0.29818	0	0	0	0.134101	0.249123	0.375298	0.32385	0.829064	0.616309	0.279191	0.440824	0.377739	0.872572	0.700419
2513020849	645001	655000	0	0	0	0	0	0	0	0	0	0	0	0	0	0	0	0	0	0	0	0	0	0	0.147085	0	0	0	0.134101	0.242019	0.384428	0.316044	0.832497	0.611119	0.279191	0.440824	0.377739	0.872572	0.700419
2513020849	650001	660000	0	0	0	0	0	0	0	0	0	0	0	0	0	0	0	0	0	0	0	0	0	0	0.147085	0	0	0	0.134101	0.243845	0.383228	0.31812	0.83732	0.607476	0.279191	0.440824	0.377739	0.872572	0.700419
2513020849	655001	665000	0	0	0	0	0	0	0	0	0	0	0	0	0	0	0	0	0	0	0	0	0	0	0	0	0	0	0	0.236051	0.388488	0.309227	0.816099	0.623295	0.279191	0.440824	0.377739	0.872572	0.700419
2513020849	660001	670000	0	0	0	0	0	0	0	0	0	0	0	0	0	0	0	0	0	0	0	0	0	0	0	0	0	0	0	0.236051	0.388488	0.309227	0.816099	0.623295	0.279191	0.440824	0.377739	0.872572	0.700419
2513020849	665001	675000	0	0	0	0	0.152325	0	0	0	0	0	0	0	0	0	0	0	0	0	0.139452	0	0	0	0.147787	0	0	0	0	0.237518	0.386546	0.310219	0.815242	0.621998	0.279191	0.440824	0.377739	0.872572	0.700419
2513020849	670001	680000	0	0	0	0.149781	0.152325	0	0	0	0	0	0	0	0	0	0	0	0	0	0.139452	0	0	0	0.147787	0	0	0.138573	0	0.236905	0.387165	0.309316	0.817918	0.616709	0.279191	0.440824	0.377739	0.872572	0.700419
2513020849	675001	685000	0	0	0	0.149781	0.152325	0	0	0	0	0	0	0	0	0	0	0	0	0	0.138903	0	0	0.142634	0.147787	0	0	0.138573	0	0.23827	0.38525	0.311805	0.818227	0.617169	0.279191	0.440824	0.377739	0.872572	0.700419
2513020849	680001	690000	0	0	0.149581	0.151639	0	0	0	0	0	0	0	0	0	0	0	0	0	0	0	0	0	0.142634	0	0	0	0.271615	0.259319	0.238809	0.385545	0.312507	0.83209	0.603727	0.279191	0.440824	0.377739	0.872572	0.700419
2513020849	685001	695000	0	0	0.148707	0	0	0	0	0	0	0	0	0	0	0	0	0	0	0	0	0	0	0.142634	0	0	0	0.135057	0.259319	0.238626	0.38576	0.312455	0.827083	0.611452	0.279191	0.440824	0.377739	0.872572	0.700419
2513020849	690001	700000	0.15571	0	0.299162	0	0	0	0	0	0	0	0	0	0	0	0	0	0	0	0	0.145963	0.152559	0	0	0	0	0.135057	0.259319	0.235308	0.385635	0.309461	0.821157	0.608177	0.279191	0.440824	0.377739	0.872572	0.700419
2513020849	695001	705000	0.151922	0	0.146247	0	0.138573	0	0	0	0	0.139856	0.146452	0.293998	0	0	0.14153	0	0.144989	0.287361	0.405827	0.136933	0.144141	0.136252	0	0	0.150448	0.395034	0.382337	0.232387	0.389666	0.318844	0.826816	0.613327	0.279191	0.440824	0.377739	0.872572	0.700419
2513020849	700001	710000	0.151922	0	0.139802	0	0.138573	0	0	0	0	0.139856	0.146452	0.293998	0	0	0.14153	0	0.144989	0.287361	0.405827	0.136933	0.144141	0.136252	0	0	0.150448	0.395034	0.382337	0.230919	0.390171	0.322958	0.831061	0.609407	0.279191	0.440824	0.377739	0.872572	0.700419
2513020849	705001	715000	0	0	0	0	0.138573	0	0	0	0	0.139856	0.146452	0.293998	0	0	0.14153	0	0.144989	0.287361	0.405827	0	0	0.135933	0	0	0.150448	0.395034	0.382337	0.233192	0.394325	0.33054	0.843585	0.614722	0.279191	0.440824	0.377739	0.873739	0.700419
2513020849	710001	720000	0	0	0	0	0.15397	0.145606	0	0	0	0	0	0	0	0	0	0	0	0	0	0.145217	0	0.146494	0	0	0	0	0	0.234482	0.382984	0.313919	0.813968	0.620993	0.279191	0.440824	0.377739	0.872572	0.700419
2513020849	715001	725000	0	0	0	0	0.15397	0.145606	0	0	0	0	0	0	0	0	0	0	0	0	0	0.145217	0	0.146494	0	0	0	0	0	0.23492	0.38454	0.312568	0.814571	0.621649	0.279191	0.440824	0.377739	0.872572	0.700419
2513020849	720001	730000	0	0	0	0	0.15397	0.145606	0	0	0	0	0	0	0	0	0	0	0	0	0	0.28312	0	0.146494	0	0	0	0.138423	0	0.233103	0.384526	0.318134	0.81693	0.619878	0.279191	0.440824	0.377739	0.872572	0.700419
2513020849	725001	735000	0	0.157321	0	0	0	0	0	0	0	0	0	0	0	0	0.143998	0	0	0	0.143132	0.138598	0	0	0	0	0	0.276995	0	0.235072	0.384564	0.319365	0.814805	0.616438	0.279191	0.440824	0.377739	0.872572	0.700419
2513020849	730001	740000	0	0.157321	0	0	0	0	0	0	0	0	0	0	0	0	0.143998	0	0	0	0.143132	0.138598	0	0	0	0	0	0.276995	0	0.234586	0.382574	0.324682	0.81409	0.612926	0.279191	0.440824	0.377739	0.872572	0.700419
2513020849	735001	745000	0.45628	0.43474	0	0	0.41602	0.405527	0.712033	0	0	0.858791	0.58903	1.04262	1.35451	0.437054	1.01308	0.855022	1.04397	0.883545	0.547552	0.419405	0.758759	0.415417	0.697792	0.312271	1.53843	0.553195	0.266203	0.703961	0.364539	0.756683	0.92328	0.297604	0.724074	0.440824	0.7703	0.93429	0.700419
2513020849	740001	750000	0.45628	0.289156	0	0	0.41602	0.405527	0.712033	0	0	1.00216	0.58903	1.04262	1.35451	0.437054	0.868804	0.855022	1.04397	0.883545	0.410395	0.419405	0.758759	0.415417	0.697792	0.312271	1.53843	0.553195	0.266203	0.9805	0.0967126	0.956966	0.834924	0.0804505	0.982153	0.440824	0.959388	0.872572	0.700419
2513020849	745001	755000	0.45628	0.289156	0	0	0.41602	0.405527	0.712033	0	0	1.00216	0.58903	1.04262	1.35451	0.437054	0.868804	0.855022	1.04397	0.883545	0.410395	0.419405	0.758759	0.415417	0.697792	0.312271	1.53843	0.553195	0.266203	0.843426	0.0413052	0.89707	0.773302	0.0359628	0.85567	0.440824	0.903152	0.872572	0.700419
2513020849	750001	760000	0	0	0	0.142278	0	0	0	0	0	0.146329	0	0	0	0	0	0	0	0	0	0	0	0	0	0	0	0.139109	0	0.235874	0.392795	0.300833	0.820389	0.603547	0.279191	0.440824	0.377739	0.872572	0.700419
2513020849	755001	765000	0	0	0	0.142278	0	0	0	0	0	0	0	0	0	0	0	0	0	0	0	0	0	0	0	0	0	0	0	0.234951	0.389629	0.304365	0.813762	0.618839	0.279191	0.440824	0.377739	0.872572	0.700419
2513020849	760001	770000	0	0	0	0.142278	0	0	0	0	0	0	0	0	0	0	0	0	0	0	0	0	0	0	0	0	0	0	0	0.235318	0.389238	0.306	0.814551	0.620342	0.279191	0.440824	0.377739	0.872572	0.700419
2513020849	765001	775000	0.16446	0.162269	0.155851	0.160119	0.156719	0.296945	0.152857	0.158023	0.146999	0.147564	0.15322	0.150765	0.152797	0.150448	0.147922	0.146452	0.151752	0.149334	0.280713	0.284557	0.151252	0.14231	0.287996	0.311985	0.158263	0.137091	0.264596	0.236075	0.386482	0.319871	0.822563	0.616299	0.279191	0.440824	0.377739	0.872572	0.700419
2513020849	770001	780000	0.16446	0.162269	0.155851	0.160119	0.156719	0.58681	0.152857	0.31256	0.146999	0.442428	0.15322	0.150765	0.307183	0.296759	0.147922	0.146452	0.301318	0.295128	0.418595	0.566363	0.151252	0.426931	0.428593	0.311985	0.158263	0.137091	0.264596	0.233424	0.375715	0.331434	0.81895	0.630837	0.279191	0.440824	0.377739	0.872572	0.700419
2513020849	775001	785000	0.16446	0.162269	0.155851	0.160119	0.156719	0.58681	0.152857	0.31256	0.146999	0.442428	0.15322	0.150765	0.307183	0.296759	0.147922	0.146452	0.301318	0.295128	0.418595	0.566363	0.151252	0.426931	0.428593	0.311985	0.158263	0.137091	0.264596	0.23418	0.379492	0.324632	0.818156	0.628614	0.279191	0.440824	0.377739	0.872572	0.700419
2513020849	780001	790000	0	0	0	0	0	0.280042	0	0.154686	0	0.288862	0	0	0.154357	0.146535	0	0	0.149631	0.145963	0.138078	0.282816	0	0.281981	0.142864	0	0	0	0	0.234062	0.380896	0.317154	0.813578	0.633822	0.279191	0.440824	0.377739	0.872572	0.700419
2513020849	785001	795000	0	0	0	0	0	0	0	0	0	0	0	0	0	0	0	0	0	0	0.143611	0	0	0	0	0	0	0	0	0.236291	0.387735	0.310791	0.815073	0.624152	0.279191	0.440824	0.377739	0.872572	0.700419
2513020849	790001	800000	0	0	0	0	0	0	0	0	0	0	0	0	0	0	0	0	0	0	0.143611	0	0	0	0	0	0	0	0	0.236412	0.387368	0.317611	0.816771	0.622014	0.279191	0.440824	0.377739	0.872572	0.700419
2513020849	795001	805000	0	0	0	0	0	0	0	0	0	0	0	0	0	0	0	0	0	0	0.143611	0	0	0	0	0	0	0	0	0.236386	0.387448	0.317001	0.816733	0.622113	0.279191	0.440824	0.377739	0.872572	0.700419
2513020849	800001	810000	0	0	0.144726	0	0	0.14153	0	0	0	0	0	0	0	0	0	0.145606	0	0	0.141806	0	0	0.144801	0	0	0	0	0	0.23889	0.387805	0.312962	0.8129	0.620642	0.279191	0.440824	0.377739	0.872572	0.700419
2513020849	805001	815000	0	0	0.144726	0	0	0.14153	0	0	0	0	0	0	0	0	0	0.145606	0	0	0.141806	0	0	0.144801	0	0	0	0	0	0.239388	0.387688	0.30958	0.81085	0.621879	0.279191	0.440824	0.377739	0.872572	0.700419
2513020849	810001	820000	0	0	0.144726	0	0	0.14153	0	0.146084	0.140786	0	0	0	0	0	0	0.145606	0	0	0.141806	0	0	0.144801	0	0	0	0	0	0.240758	0.383272	0.305692	0.813256	0.624156	0.279191	0.440824	0.377739	0.872572	0.700419
2513020849	815001	825000	0	0	0	0	0	0	0	0.146084	0.140786	0	0	0	0	0	0	0	0	0	0	0	0	0	0	0	0	0	0	0.237943	0.383056	0.304532	0.818708	0.62596	0.279191	0.440824	0.377739	0.872572	0.700419
2513020849	820001	830000	0.164905	0.164132	0.163387	0.159855	0.162368	0.295663	0.157398	0.453101	0.431994	0.290129	0.150765	0.153717	0.151979	0.299967	0.149383	0.147742	0.306563	0.150501	0.280713	0.28355	0.150448	0.281168	0.143681	0.155921	0.15564	0.13803	0.131539	0.236095	0.376742	0.307871	0.81199	0.630389	0.279191	0.440824	0.377739	0.872572	0.700419
2513020849	825001	835000	0.164905	0.164132	0.163387	0.159855	0.162368	0.295663	0.157398	0.308714	0.293998	0.290129	0.150765	0.153717	0.151979	0.451502	0.149383	0.147742	0.306563	0.150501	0.280713	0.28355	0.150448	0.281168	0.143681	0.155921	0.15564	0.13803	0.131539	0.230755	0.379031	0.313172	0.806029	0.631689	0.279191	0.440824	0.377739	0.872572	0.700419
2513020849	830001	840000	0.164905	0.164132	0.163387	0.159855	0.162368	0.295663	0.157398	0.308714	0.293998	0.290129	0.150765	0.153717	0.151979	0.451502	0.149383	0.147742	0.306563	0.150501	0.280713	0.28163	0.150448	0.28094	0.143681	0.155921	0.15564	0.13803	0.131539	0.230638	0.378775	0.313264	0.805748	0.631918	0.279191	0.440824	0.377739	0.872572	0.700419
2513020849	835001	845000	0	0	0	0	0	0	0	0	0	0	0	0	0	0.150501	0	0	0	0	0	0.140244	0	0	0	0	0	0	0	0.23017	0.386891	0.312238	0.812199	0.626379	0.279191	0.440824	0.377739	0.872572	0.700419
2513020849	840001	850000	0	0	0	0	0	0	0	0	0	0	0	0	0	0	0	0	0	0	0.142504	0.281225	0	0	0	0	0	0	0	0.231113	0.385798	0.314622	0.813635	0.625432	0.279191	0.440824	0.377739	0.872572	0.700419
2513020849	845001	855000	0	0.153591	0.14637	0	0	0.142536	0	0	0	0	0.14909	0	0	0	0	0	0	0.147832	0.142504	0.423149	0	0	0	0	0	0	0	0.219734	0.376054	0.315632	0.803169	0.614136	0.279191	0.440824	0.377739	0.872572	0.700419
2513020849	850001	860000	0	0.153591	0.14637	0	0	0.142536	0	0	0	0	0.14909	0	0	0	0	0	0	0.147832	0.142504	0.283304	0	0	0	0	0	0	0	0.206221	0.361676	0.318705	0.785896	0.597476	0.279191	0.440824	0.377739	0.872572	0.700419
2513020849	855001	865000	0	0.153591	0.14637	0	0	0.142536	0	0	0	0	0.14909	0	0	0	0	0	0	0.147832	0	0.142732	0	0	0	0	0	0	0	0.189358	0.343764	0.300944	0.763628	0.549052	0.279191	0.440824	0.377739	0.872572	0.700419
2513020849	860001	870000	0.151417	0.142536	0	0	0	0	0	0	0	0.142342	0	0.296207	0.151583	0	0	0	0	0	0	0	0	0.138348	0	0	0	0	0	0.24678	0.45358	0.270017	0.825104	0.637261	0.279191	0.482463	0.377739	0.872572	0.700419
2513020849	865001	875000	0.151417	0.142536	0	0	0	0	0	0	0	0.142342	0	0.296207	0.151583	0	0	0	0	0	0	0	0	0.138348	0	0	0	0	0	0.241295	0.42046	0.288932	0.820805	0.631425	0.279191	0.455414	0.377739	0.872572	0.700419
2513020849	870001	880000	0.151417	0.142536	0	0	0	0	0	0	0	0.142342	0	0.296207	0.151583	0	0	0	0	0	0	0	0	0.138348	0	0	0	0	0	0.239168	0.407524	0.296878	0.818967	0.628443	0.279191	0.447294	0.377739	0.872572	0.700419
2513020849	875001	885000	0	0	0	0	0	0	0	0	0	0	0	0	0	0	0	0	0	0	0	0	0	0	0	0	0	0	0	0.236051	0.388488	0.309227	0.816099	0.623295	0.279191	0.440824	0.377739	0.872572	0.700419
2513020849	880001	890000	0	0	0	0	0	0	0	0	0	0	0	0	0	0	0	0	0	0	0	0	0	0	0	0	0	0	0	0.236051	0.388488	0.309227	0.816099	0.623295	0.279191	0.440824	0.377739	0.872572	0.700419
2513020849	885001	895000	0	0	0	0.155362	0	0	0	0	0	0	0	0	0	0	0.154488	0	0	0	0	0.142375	0	0	0	0	0	0	0	0.233276	0.386526	0.310593	0.812849	0.623946	0.279191	0.440824	0.377739	0.872572	0.700419
2513020849	890001	900000	0	0	0	0.155362	0	0	0	0	0	0	0	0	0	0	0.154488	0	0	0	0	0.283612	0	0	0.144726	0	0	0	0	0.232029	0.384413	0.3148	0.813422	0.623961	0.279191	0.440824	0.377739	0.872572	0.700419
2513020849	895001	905000	0	0	0	0.155362	0.153654	0.146871	0	0	0.143199	0	0.152036	0	0	0	0.154488	0.149882	0	0.152857	0.288354	0.711873	0.309372	0	0.295484	0	0	0	0.26787	0.229879	0.375813	0.334178	0.820833	0.618422	0.279191	0.440824	0.377739	0.872572	0.700419
2513020849	900001	910000	0	0	0	0	0.153654	0.146871	0	0	0.143199	0	0.152036	0	0	0	0	0.149882	0	0.152857	0.288354	0.569627	0.309372	0	0.295484	0	0	0	0.26787	0.232099	0.375941	0.336866	0.825544	0.616759	0.279191	0.440824	0.378281	0.872572	0.700419
2513020849	905001	915000	0	0	0	0	0.153654	0.146871	0	0	0.143199	0	0.152036	0	0	0	0	0.149882	0	0.152857	0.288354	0.431042	0.309372	0	0.151417	0	0	0	0.26787	0.232636	0.377167	0.333829	0.825095	0.616713	0.279191	0.440824	0.377739	0.872572	0.700419
2513020849	910001	920000	0	0	0	0.153405	0	0	0	0	0	0	0	0	0.152093	0	0	0.146871	0	0	0.141288	0.143507	0	0.141499	0	0	0	0	0	0.238018	0.394214	0.311502	0.815664	0.633837	0.279191	0.440824	0.377739	0.872572	0.700419
2513020849	915001	925000	0	0	0	0.153405	0	0	0	0	0	0	0	0	0.152093	0	0	0.146871	0	0	0.141288	0.143507	0	0.141499	0	0	0	0	0	0.238436	0.395419	0.311983	0.815575	0.636028	0.279191	0.440824	0.377739	0.872572	0.700419
2513020849	920001	930000	0	0	0	0.153405	0	0	0	0	0	0.145179	0	0	0.152093	0	0	0.146871	0	0	0.281981	0.143507	0	0.141499	0	0	0	0	0	0.23964	0.395755	0.311267	0.812624	0.636627	0.279191	0.440824	0.377739	0.872572	0.700419
2513020849	925001	935000	0	0	0	0	0	0	0	0	0	0.145179	0	0	0	0	0	0	0	0	0.140728	0	0	0	0	0	0	0	0	0.237449	0.388144	0.307896	0.811967	0.622746	0.279191	0.440824	0.377739	0.872572	0.700419
2513020849	930001	940000	0	0	0	0	0	0	0	0	0	0.145179	0	0	0	0	0	0	0	0	0.140728	0	0	0	0	0	0	0	0	0.237064	0.38823	0.308248	0.813084	0.622895	0.279191	0.440824	0.377739	0.872572	0.700419
2513020849	935001	945000	0	0	0	0	0	0	0	0	0	0	0	0	0	0	0	0	0	0	0	0	0	0	0	0	0	0	0	0.236051	0.388488	0.309227	0.816099	0.623295	0.279191	0.440824	0.377739	0.872572	0.700419
2513020849	940001	950000	0	0	0	0	0	0	0	0	0	0.146452	0	0	0	0	0	0	0	0	0	0	0	0	0	0	0	0	0	0.236797	0.389497	0.311594	0.815497	0.618173	0.279191	0.440824	0.377739	0.872572	0.700419
2513020849	945001	955000	0	0	0	0	0	0	0	0	0	0.146452	0	0	0	0	0	0	0	0	0	0	0	0	0	0	0	0	0	0.237433	0.39035	0.313587	0.815014	0.61364	0.279191	0.440824	0.377739	0.872572	0.700419
2513020849	950001	960000	0	0	0	0	0	0	0	0	0	0.146452	0	0	0	0	0	0	0	0	0	0	0	0	0	0	0	0	0	0.237591	0.39056	0.314078	0.814898	0.612495	0.279191	0.440824	0.377739	0.872572	0.700419
2513020849	955001	965000	0.167932	0	0	0	0	0	0	0	0	0	0	0	0	0	0.152151	0.150606	0	0	0	0.142765	0	0.288139	0.149481	0	0	0.141378	0.13556	0.239266	0.369748	0.343029	0.82236	0.596721	0.279191	0.440824	0.382288	0.872572	0.700419
2513020849	960001	970000	0.737821	0.144652	0.136665	0.55369	0.279386	0.135849	0.279822	0.280376	0.26648	0.1525	0.155431	0.578904	0.726279	0.578164	0.86858	0.84936	0.732885	0.577286	0.823922	0.981707	0.449494	1.12061	0.860629	0.314186	0.741897	1.23526	1.337	0.250021	0.42171	0.642128	0.962958	0.597972	0.279201	0.456124	0.655367	0.964582	0.700419
2513020849	965001	975000	0.737821	0.144652	0.136665	0.55369	0.279386	0.135849	0.279822	0.280376	0.26648	0.1525	0.155431	0.578904	0.726279	0.578164	0.86858	0.84936	0.732885	0.577286	0.823922	0.981707	0.449494	1.12061	0.860629	0.314186	0.741897	1.23526	1.337	0.249269	0.420237	0.627566	0.959366	0.598864	0.279191	0.455414	0.641056	0.961794	0.700419
2513020849	970001	980000	0.59008	0.144652	0.136665	0.55369	0.279386	0.135849	0.279822	0.280376	0.26648	0.1525	0.155431	0.578904	0.726279	0.578164	0.714654	0.698196	0.732885	0.577286	0.823922	0.83497	0.449494	0.8276	0.707041	0.314186	0.741897	1.09403	1.19455	0.238537	0.412889	0.429696	0.894785	0.624322	0.279191	0.450493	0.45409	0.910887	0.700419
2513020849	975001	985000	0	0	0	0	0	0	0	0	0	0	0	0	0	0	0	0	0	0	0	0	0	0	0	0	0	0	0	0.236051	0.388488	0.309227	0.816099	0.623295	0.279191	0.440824	0.377739	0.872572	0.700419
2513020849	980001	990000	0	0	0	0	0	0	0	0	0	0	0	0	0	0	0	0	0	0	0	0.141228	0	0.144431	0	0	0	0	0	0.234557	0.384876	0.313693	0.815836	0.623693	0.279191	0.440824	0.377739	0.872572	0.700419
2513020849	985001	995000	0	0	0	0	0	0	0	0	0	0.14752	0	0	0	0	0	0.148058	0	0	0.139774	0.282938	0	0.433293	0	0	0	0	0	0.238936	0.378035	0.341326	0.805173	0.62281	0.279191	0.440824	0.381105	0.872572	0.700419
2513020849	990001	1000000	0	0	0	0	0	0	0	0	0	0.14752	0	0	0	0	0	0.148058	0	0	0.139774	0.282938	0	0.433293	0	0	0	0	0	0.239381	0.376706	0.345819	0.803533	0.622527	0.279191	0.440824	0.382883	0.872572	0.700419
2513020849	995001	1005000	0	0	0	0	0	0	0	0	0	0.14752	0	0	0	0	0	0.148058	0	0	0.139774	0.141713	0	0.285072	0	0	0	0	0	0.245405	0.381655	0.350301	0.798567	0.620824	0.279191	0.440824	0.385331	0.872572	0.700419
2513020849	1000001	1010000	0	0	0	0	0	0	0	0	0	0	0	0	0	0	0	0	0	0	0	0	0	0	0	0	0	0	0	0.236051	0.388488	0.309227	0.816099	0.623295	0.279191	0.440824	0.377739	0.872572	0.700419
2513020849	1005001	1015000	0	0	0	0	0	0.151639	0	0	0	0	0.152325	0	0	0	0	0.150035	0.157786	0	0	0.146329	0	0	0	0	0	0	0	0.235884	0.386048	0.319848	0.804493	0.631382	0.279191	0.440824	0.377739	0.872572	0.700419
2513020849	1010001	1020000	0	0	0	0	0	0.151639	0	0	0	0	0.152325	0	0	0	0	0.150035	0.157786	0	0	0.146329	0	0	0	0	0	0	0	0.2359	0.386617	0.317232	0.807317	0.629452	0.279191	0.440824	0.377739	0.872572	0.700419
2513020849	1015001	1025000	0	0	0	0	0	0.151639	0	0	0	0	0.152325	0	0	0	0	0.150035	0.157786	0	0	0.146329	0	0	0	0	0	0	0	0.235958	0.387556	0.313109	0.811813	0.62633	0.279191	0.440824	0.377739	0.872572	0.700419
2513020849	1020001	1030000	0	0	0	0	0	0	0	0	0	0	0	0	0	0	0	0	0	0	0	0	0	0	0	0	0	0	0	0.236051	0.388488	0.309227	0.816099	0.623295	0.279191	0.440824	0.377739	0.872572	0.700419
2513020849	1025001	1035000	0	0	0	0	0	0	0	0	0	0	0	0	0	0	0	0	0	0	0	0	0	0	0	0	0	0	0	0.236051	0.388488	0.309227	0.816099	0.623295	0.279191	0.440824	0.377739	0.872572	0.700419
2513020849	1030001	1040000	0	0	0	0	0	0	0	0	0	0	0	0	0	0	0	0	0	0	0	0	0	0	0	0	0	0	0	0.236051	0.388488	0.309227	0.816099	0.623295	0.279191	0.440824	0.377739	0.872572	0.700419
2513020849	1035001	1045000	0	0	0	0.147653	0	0.140132	0	0	0.137742	0	0	0	0	0	0	0	0	0	0	0	0	0	0	0	0	0	0	0.236518	0.385541	0.291897	0.816553	0.620763	0.279191	0.440824	0.377739	0.872572	0.700419
2513020849	1040001	1050000	0	0	0	0.147653	0	0.140132	0	0	0.137742	0	0	0	0	0	0	0	0	0	0.143438	0.145372	0	0	0	0	0	0	0	0.231743	0.382944	0.303734	0.812783	0.624719	0.279191	0.440824	0.377739	0.872572	0.700419
2513020849	1045001	1055000	0	0	0	0.147653	0	0.140132	0	0	0.137742	0	0	0	0	0	0	0	0	0	0.143438	0.145372	0	0	0	0	0	0	0	0.231361	0.38245	0.303247	0.812464	0.624848	0.279191	0.440824	0.377739	0.872572	0.700419
2513020849	1050001	1060000	0	0	0	0	0	0	0	0	0	0	0	0	0	0	0	0	0	0	0.143438	0.145372	0	0	0	0	0	0	0	0.232673	0.385966	0.314327	0.813526	0.625497	0.279191	0.440824	0.377739	0.872572	0.700419
2513020849	1055001	1065000	0	0	0	0	0	0	0	0	0	0	0	0	0	0	0	0	0	0	0	0	0	0	0	0	0	0	0	0.236051	0.388488	0.309227	0.816099	0.623295	0.279191	0.440824	0.377739	0.872572	0.700419
2513020849	1060001	1070000	0	0	0	0	0	0	0	0	0	0	0	0	0	0	0	0	0	0	0	0	0	0	0	0	0	0	0	0.236051	0.388488	0.309227	0.816099	0.623295	0.279191	0.440824	0.377739	0.872572	0.700419
2513020849	1065001	1075000	0	0	0	0	0	0.150189	0	0	0	0	0	0	0	0	0	0	0	0	0	0	0	0	0	0	0	0	0	0.237182	0.386776	0.305584	0.815993	0.6223	0.279191	0.440824	0.377739	0.872572	0.700419
2513020849	1070001	1080000	0	0	0	0	0	0.150189	0	0	0	0	0	0	0	0	0	0	0	0	0	0	0	0	0	0	0	0	0	0.236759	0.387409	0.306931	0.816033	0.622669	0.279191	0.440824	0.377739	0.872572	0.700419
2513020849	1075001	1085000	0	0	0	0	0	0.150189	0	0	0	0	0	0	0	0	0	0	0	0	0.147085	0	0	0	0	0	0	0	0	0.23715	0.38635	0.308499	0.814775	0.623625	0.279191	0.440824	0.377739	0.872572	0.700419
2513020849	1080001	1090000	0	0	0	0	0	0	0	0	0	0.14637	0	0	0	0	0	0.147476	0.156352	0	0.147085	0.143098	0.152559	0	0	0	0	0	0	0.238845	0.389462	0.317583	0.805837	0.628986	0.279191	0.440824	0.377739	0.872572	0.700419
2513020849	1085001	1095000	0	0	0	0	0	0	0	0	0	0.14637	0	0	0	0	0	0.147476	0.156352	0	0.285596	0.143098	0.152559	0	0	0	0	0	0	0.240898	0.388485	0.325426	0.798228	0.633754	0.279191	0.440824	0.377739	0.872572	0.700419
2513020849	1090001	1100000	0	0	0	0	0	0	0	0	0	0.14637	0	0	0	0	0	0.147476	0.156352	0	0.139452	0.143098	0.152559	0	0	0	0	0	0	0.241549	0.390563	0.325454	0.796177	0.634235	0.279191	0.440824	0.377739	0.872572	0.700419
2513020849	1095001	1105000	0	0	0	0	0	0	0	0	0	0	0	0	0	0	0	0	0	0	0.139452	0	0	0	0	0	0	0	0	0.23644	0.387286	0.31174	0.814456	0.624673	0.279191	0.440824	0.377739	0.872572	0.700419
2513020849	1100001	1110000	0	0.285596	0.551541	0.276157	0.138006	0	0	0	0	0.285729	0	0	0.439482	0.433955	0.579503	0.422271	0.737161	0.575003	0.547105	0.69362	0.582581	0.406802	0.279278	0.300377	0	0.266031	0.254487	0.215407	0.38104	0.404682	0.771824	0.646154	0.279191	0.440824	0.433843	0.872572	0.700419
2513020849	1105001	1115000	0	0.285596	0.692988	0.276157	0.138006	0	0.142634	0	0	0.285729	0	0	0.439482	0.433955	0.729416	0.422271	0.737161	0.575003	0.547105	0.69362	0.582581	0.406802	0.279278	0.300377	0	0.266031	0.382541	0.222007	0.377923	0.375435	0.786648	0.635101	0.279191	0.440824	0.40695	0.872572	0.700419
2513020849	1110001	1120000	0	0.285596	0.692988	0.276157	0.138006	0	0.142634	0	0	0.285729	0	0	0.439482	0.433955	0.729416	0.422271	0.737161	0.575003	0.547105	0.69362	0.582581	0.406802	0.279278	0.300377	0	0.266031	0.382541	0.220788	0.376998	0.382861	0.783931	0.636607	0.279191	0.440824	0.414621	0.872572	0.700419
2513020849	1115001	1125000	0	0	0.14153	0	0	0	0.142634	0	0	0	0	0	0	0	0.146535	0	0	0	0	0	0	0	0	0	0	0	0.133844	0.237955	0.381565	0.308266	0.81925	0.614668	0.279191	0.440824	0.377739	0.872572	0.700419
2513020849	1120001	1130000	0	0	0	0	0	0	0	0	0	0	0	0	0	0	0	0	0	0	0	0	0	0	0	0	0	0	0	0.236051	0.388488	0.311293	0.81584	0.624741	0.279191	0.440824	0.377739	0.872572	0.700419
2513020849	1125001	1135000	0	0	0	0	0	0	0	0	0	0	0	0	0	0	0	0	0	0	0	0	0	0	0	0	0	0	0	0.236051	0.388488	0.309227	0.816099	0.623295	0.279191	0.440824	0.377739	0.872572	0.700419
2513020849	1130001	1140000	0	0	0	0	0	0	0	0	0	0	0	0	0	0	0	0	0	0	0	0	0	0	0	0	0	0	0	0.236051	0.388488	0.309227	0.816099	0.623295	0.279191	0.440824	0.377739	0.872572	0.700419
2513020849	1135001	1145000	0	0	0	0	0	0	0	0	0	0	0	0	0	0	0	0	0	0	0	0	0	0	0	0	0	0	0	0.236051	0.388488	0.309227	0.816099	0.623295	0.279191	0.440824	0.377739	0.872572	0.700419
2513020849	1140001	1150000	0	0	0	0	0	0	0	0	0	0	0	0	0	0	0	0	0	0	0	0	0	0	0	0	0	0	0	0.236051	0.388488	0.309227	0.816099	0.623295	0.279191	0.440824	0.377739	0.872572	0.700419
2513020849	1145001	1155000	0	0	0	0	0	0	0	0	0	0	0	0	0	0	0	0	0	0	0	0	0	0	0	0	0	0	0	0.236051	0.388488	0.309227	0.816099	0.623295	0.279191	0.440824	0.377739	0.872572	0.700419
2513020849	1150001	1160000	0	0	0	0	0	0	0	0	0	0	0	0	0	0	0	0	0	0	0	0	0	0	0	0	0	0	0	0.236051	0.388488	0.309227	0.816099	0.623295	0.279191	0.440824	0.377739	0.872572	0.700419
2513020849	1155001	1165000	0	0	0	0	0	0	0	0	0	0	0	0	0	0	0	0.144989	0	0	0	0	0	0	0	0	0	0.143199	0	0.238567	0.394078	0.315829	0.818096	0.62208	0.279191	0.440824	0.377739	0.872572	0.700419
2513020849	1160001	1170000	0	0	0	0	0	0	0	0	0	0	0	0	0	0	0	0.144989	0	0	0	0	0	0	0	0	0	0.143199	0	0.238838	0.394678	0.316542	0.818304	0.621953	0.279191	0.440824	0.377739	0.872572	0.700419
2513020849	1165001	1175000	0	0	0	0	0	0	0	0	0	0	0	0	0	0	0	0.144989	0	0	0	0	0	0	0	0	0	0.143199	0	0.239434	0.395995	0.318108	0.818757	0.621676	0.279191	0.440824	0.377739	0.872572	0.700419
2513020849	1170001	1180000	0	0	0	0	0	0	0	0	0	0	0	0	0	0	0	0	0	0	0	0	0	0	0	0	0	0	0	0.236051	0.388488	0.309227	0.816099	0.623295	0.279191	0.440824	0.377739	0.872572	0.700419
2513020849	1175001	1185000	0	0	0	0	0	0	0	0	0	0	0	0	0	0	0	0.143891	0	0	0.141591	0	0.150035	0	0	0	0	0	0	0.239861	0.389625	0.318815	0.814974	0.626059	0.279191	0.440824	0.377739	0.872572	0.700419
2513020849	1180001	1190000	0.158424	0	0	0	0.152977	0.145179	0	0	0.149139	0.147922	0	0	0	0	0	0.143891	0	0	0.141591	0.147214	0.150035	0.146871	0.14752	0	0	0	0.133468	0.239935	0.380312	0.317702	0.821786	0.607964	0.279191	0.440824	0.377739	0.872572	0.700419
2513020849	1185001	1195000	0.158424	0	0	0	0.152977	0.147877	0	0	0.146956	0.147922	0	0	0	0	0	0.143891	0	0	0.141591	0.147214	0.151583	0.146084	0.14752	0	0	0	0.133292	0.245893	0.36896	0.330351	0.82277	0.585363	0.279191	0.440824	0.377739	0.872572	0.700419
2513020849	1190001	1200000	0.158424	0	0	0	0.152977	0.147877	0	0	0.146956	0.147922	0	0	0	0	0	0	0	0	0	0.147214	0	0.146084	0.14752	0	0	0	0.1337	0.234027	0.3603	0.299482	0.837692	0.566954	0.279191	0.440824	0.377739	0.872572	0.700419
2513020849	1195001	1205000	0	0	0	0	0	0	0	0	0	0	0	0	0	0	0	0	0	0	0	0	0	0	0	0	0	0	0	0.236051	0.388488	0.309227	0.816099	0.623295	0.279191	0.440824	0.377739	0.872572	0.700419
2513020849	1200001	1210000	0	0	0	0	0	0	0	0.15397	0	0	0	0	0	0	0	0	0	0.153717	0	0	0	0	0	0	0	0	0	0.220905	0.360282	0.34522	0.813071	0.624972	0.279191	0.440824	0.382883	0.872572	0.700419
2513020849	1205001	1215000	0	0	0	0	0	0	0	0.15397	0	0	0	0	0	0	0	0	0	0.153717	0	0	0	0	0	0	0	0	0	0.226455	0.370713	0.331252	0.814279	0.624249	0.279191	0.440824	0.377739	0.872572	0.700419
2513020849	1210001	1220000	0	0	0	0	0	0	0	0.15397	0	0	0	0	0	0	0	0	0	0.153717	0	0.140699	0	0	0	0	0	0	0	0.226142	0.376451	0.325041	0.813957	0.624759	0.279191	0.440824	0.377739	0.872572	0.700419
2513020849	1215001	1225000	0	0	0	0	0	0	0	0	0	0	0	0	0	0	0	0	0	0	0	0.140699	0	0.149531	0	0	0	0	0	0.23435	0.38402	0.314727	0.815798	0.623757	0.279191	0.440824	0.377739	0.872572	0.700419
2513020849	1220001	1230000	0	0	0	0	0	0	0	0	0	0	0	0	0	0	0	0	0	0	0	0.140699	0	0.149531	0	0	0	0	0	0.234133	0.383445	0.315451	0.81575	0.623817	0.279191	0.440824	0.377739	0.872572	0.700419
2513020849	1225001	1235000	0	0	0	0	0	0	0	0	0	0	0	0	0	0	0	0	0	0	0	0	0	0.149531	0	0	0	0	0	0.240555	0.382286	0.314949	0.817409	0.622545	0.279191	0.440824	0.377739	0.872572	0.700419
2513020849	1230001	1240000	0	0	0	0	0	0	0	0	0	0	0	0	0	0	0	0	0	0	0	0	0	0	0	0	0	0	0	0.236051	0.388488	0.309227	0.816099	0.623295	0.279191	0.440824	0.377739	0.872572	0.700419
2513020849	1235001	1245000	0	0	0	0	0	0	0	0	0	0	0	0	0	0	0	0	0	0	0	0	0	0	0	0	0	0	0	0.236051	0.388488	0.309227	0.816099	0.623295	0.279191	0.440824	0.377739	0.872572	0.700419
2513020849	1240001	1250000	0	0	0	0	0	0	0	0	0	0	0	0	0	0	0	0	0	0	0	0	0	0	0	0	0	0	0	0.236051	0.388488	0.309227	0.816099	0.623295	0.279191	0.440824	0.377739	0.872572	0.700419
2513020849	1245001	1255000	0	0	0	0	0	0.144105	0	0	0	0	0.151472	0	0	0	0	0.146044	0	0	0.142997	0.143132	0	0.143335	0.145179	0	0	0	0.133275	0.244988	0.3745	0.332563	0.828004	0.613293	0.279191	0.440824	0.377739	0.872572	0.700419
2513020849	1250001	1260000	0	0	0	0	0	0.144105	0	0	0	0	0.151472	0	0	0	0	0.146044	0	0	0.142997	0.143132	0	0.143335	0.145179	0	0	0	0.133275	0.244509	0.375212	0.331316	0.827423	0.613847	0.279191	0.440824	0.377739	0.872572	0.700419
2513020849	1255001	1265000	0	0	0.163703	0	0	0.144105	0	0	0	0	0.151472	0	0	0	0	0.146044	0	0	0.142997	0.290743	0	0.143335	0.145179	0	0	0	0.133275	0.237548	0.378127	0.323526	0.820417	0.611035	0.279191	0.440824	0.377739	0.872572	0.700419
2513020849	1260001	1270000	0	0	0.163703	0	0	0	0	0	0	0	0	0	0	0	0	0	0	0	0	0.147967	0	0	0	0	0	0	0	0.233462	0.387582	0.308975	0.814105	0.619577	0.279191	0.440824	0.377739	0.872572	0.700419
2513020849	1265001	1275000	0	0	0.163703	0	0	0	0	0	0	0	0	0	0	0	0	0	0	0	0	0.147967	0	0	0	0	0	0	0	0.234023	0.387779	0.309027	0.814544	0.620386	0.279191	0.440824	0.377739	0.872572	0.700419
2513020849	1270001	1280000	0	0	0	0	0	0	0	0	0	0	0	0	0	0	0	0	0	0	0	0	0	0	0	0	0	0	0	0.236051	0.388488	0.309227	0.816099	0.623295	0.279191	0.440824	0.377739	0.872572	0.700419
2513020849	1275001	1285000	0	0	0	0.147085	0	0	0	0	0	0	0	0	0	0	0	0	0	0	0	0	0	0	0	0	0	0	0	0.235502	0.389046	0.306814	0.814943	0.621088	0.279191	0.440824	0.377739	0.872572	0.700419
2513020849	1280001	1290000	0	0	0	0.147085	0	0	0	0	0	0	0	0	0	0	0	0	0	0	0	0	0	0	0	0	0	0	0	0.235267	0.389292	0.305772	0.814441	0.620132	0.279191	0.440824	0.377739	0.872572	0.700419
2513020849	1285001	1295000	0	0	0	0.146577	0	0	0	0	0	0	0	0	0	0	0	0	0	0	0	0	0	0	0	0	0	0	0	0.235011	0.389564	0.304633	0.813891	0.619085	0.279191	0.440824	0.377739	0.872572	0.700419
2513020849	1290001	1300000	0	0	0	0.151472	0	0	0	0	0	0	0	0	0	0	0	0	0	0	0	0	0	0	0	0	0	0	0	0.234637	0.389972	0.302957	0.81308	0.61754	0.279191	0.440824	0.377739	0.872572	0.700419
2513020849	1295001	1305000	0	0.15628	0	0.456453	0	0	0	0	0	0	0	0	0	0	0	0	0	0	0	0.147877	0	0.146411	0	0	0.477758	0	0.137742	0.246663	0.403121	0.317169	0.822214	0.590705	0.279191	0.444333	0.377739	0.872572	0.700419
2513020849	1300001	1310000	0	0.15628	0	0.478013	0	0	0	0	0	0	0	0	0	0	0	0	0	0	0	0.147877	0	0.146411	0	0	0.477758	0	0.137742	0.245366	0.401645	0.315747	0.821328	0.593696	0.279191	0.443117	0.377739	0.872572	0.700419
2513020849	1305001	1315000	0	0.15628	0	0.31045	0	0	0	0	0	0	0	0	0	0	0	0	0	0	0	0.147877	0	0.146411	0	0	0.477758	0	0.137742	0.246571	0.400983	0.32018	0.823379	0.59667	0.279191	0.442799	0.377739	0.872572	0.700419
2513020849	1310001	1320000	0	0	0	0	0	0	0	0	0	0	0	0	0	0	0	0	0	0	0	0	0	0	0	0	0	0	0	0.236051	0.388488	0.309227	0.816099	0.623295	0.279191	0.440824	0.377739	0.872572	0.700419
2513020849	1315001	1325000	0	0	0	0	0	0	0	0	0	0	0	0	0	0	0	0	0	0	0	0	0	0	0	0	0	0	0	0.236051	0.388488	0.309227	0.816099	0.623295	0.279191	0.440824	0.377739	0.872572	0.700419
2513020849	1320001	1330000	0.163703	0	0	0	0	0	0.150765	0	0	0.146577	0	0	0	0	0	0.148426	0.152857	0.152857	0.142732	0.147301	0	0	0.147128	0	0	0	0	0.23007	0.385047	0.317513	0.802426	0.622637	0.279191	0.440824	0.377739	0.872572	0.700419
2513020849	1325001	1335000	0.163703	0	0	0	0	0	0.150765	0	0	0.146577	0	0	0	0	0	0.148426	0.152857	0.299562	0.142732	0.147301	0	0	0.147128	0	0	0	0	0.222132	0.382567	0.327179	0.797643	0.621819	0.279191	0.440824	0.377739	0.872572	0.700419
2513020849	1330001	1340000	0.163703	0	0	0	0	0	0.150765	0	0	0.146577	0	0	0	0	0	0.148426	0.152857	0.299562	0.142732	0.147301	0	0	0.147128	0	0	0	0	0.223489	0.383149	0.325349	0.799505	0.621965	0.279191	0.440824	0.377739	0.872572	0.700419
2513020849	1335001	1345000	0	0	0	0	0	0	0	0	0	0	0	0	0	0	0	0	0	0.147171	0	0	0	0	0	0	0	0	0	0.223259	0.38525	0.323799	0.813291	0.621896	0.279191	0.440824	0.377739	0.872572	0.700419
2513020849	1340001	1350000	0	0	0	0.156352	0	0	0	0	0	0	0	0	0	0	0	0	0	0	0	0	0	0	0	0	0	0	0	0.232702	0.392279	0.294037	0.808695	0.609235	0.279191	0.440824	0.377739	0.872572	0.700419
2513020849	1345001	1355000	0	0	0	0.325947	0	0.156208	0	0	0	0.151252	0	0	0.156943	0	0	0	0	0	0	0	0	0	0	0	0	0	0	0.26167	0.457113	0.211011	0.841279	0.650253	0.288104	0.48535	0.377739	0.872572	0.700543
2513020849	1350001	1360000	0	0	0	0.463859	0	0.156208	0	0	0	0.151252	0	0	0.156943	0	0	0	0	0	0	0	0	0	0	0	0	0	0	0.24707	0.429083	0.239941	0.824361	0.627152	0.279191	0.46179	0.377739	0.872572	0.700419
2513020849	1355001	1365000	0	0	0	0.305954	0	0.156208	0	0	0	0.151252	0	0	0.156943	0	0	0	0	0	0	0	0	0	0	0	0	0	0	0.249361	0.424112	0.252432	0.830399	0.638835	0.279191	0.458103	0.377739	0.872572	0.700419
2513020849	1360001	1370000	0	0	0	0.150872	0	0	0	0	0	0	0	0	0	0	0	0	0	0	0	0	0	0	0	0	0	0	0	0.23445	0.39018	0.302113	0.812669	0.61676	0.279191	0.440824	0.377739	0.872572	0.700419
2513020849	1365001	1375000	0	0	0	0.310177	0	0	0	0	0	0	0	0	0	0	0	0	0	0	0	0	0	0	0	0	0	0	0	0.233965	0.390734	0.299907	0.811592	0.614716	0.279191	0.440824	0.377739	0.872572	0.700419
2513020849	1370001	1380000	0	0	0	0.310177	0	0.146044	0	0	0	0	0	0	0	0	0	0	0	0	0	0.144876	0	0	0	0	0	0	0	0.232589	0.38756	0.302552	0.812408	0.617741	0.279191	0.440824	0.377739	0.872572	0.700419
2513020849	1375001	1385000	0.169981	0	0	0.31114	0.166424	0.146044	0	0	0	0	0	0	0	0	0.152151	0	0.157169	0.153467	0.289527	0.442034	0	0.147345	0	0	0	0	0	0.219322	0.376281	0.318958	0.793799	0.619591	0.279191	0.440824	0.377739	0.872572	0.700419
2513020849	1380001	1390000	0.169981	0	0	0.336652	0.166424	0.146044	0	0	0	0.599528	0.62312	0.622279	0.312996	0.461719	0.456453	0.300792	0.470604	0.767334	0.581953	1.03141	0.62312	0.442034	0.598722	0.649872	0.319189	0.567848	0.549097	0.19467	0.411167	0.444095	0.838983	0.66546	0.279191	0.449028	0.467302	0.872572	0.709665
2513020849	1385001	1395000	0.169981	0	0	0.336652	0.166424	0	0	0	0	0.599528	0.62312	0.622279	0.312996	0.461719	0.456453	0.300792	0.470604	0.767334	0.581953	0.885385	0.62312	0.442034	0.598722	0.649872	0.319189	0.558989	0.541587	0.165178	0.442337	0.604464	0.853018	0.699242	0.279191	0.473476	0.619262	0.879675	0.737089
2513020849	1390001	1400000	0	0	0	0.336652	0	0	0	0	0	0.599528	0.62312	0.622279	0.312996	0.461719	0.304766	0.300792	0.313143	0.614365	0.292007	0.587316	0.62312	0.293998	0.598722	0.649872	0.319189	0.558989	0.541587	0.171639	0.546629	0.75433	0.916882	0.719485	0.279191	0.574226	0.768562	0.929361	0.755746
2513020849	1395001	1405000	0.147742	0.142931	0	0	0	0	0	0	0	0.282576	0.293321	0.291133	0.291527	0	0.435652	0.141168	0	0.144838	0.136621	0.140049	0.147171	0.275247	0.277601	0.149285	0.298667	0.408052	0.261698	0.296078	0.488596	0.402667	0.924481	0.654467	0.322994	0.516466	0.432521	0.934709	0.701605
2513020849	1400001	1410000	0.147742	0.142931	0	0	0.155921	0	0	0	0	0.282576	0.293321	0.291133	0.291527	0	0.435652	0.141168	0	0.144838	0.136621	0.140049	0.147171	0.275247	0.277601	0.149285	0.298667	0.405527	0.259778	0.257045	0.427501	0.338246	0.872015	0.639498	0.2838	0.461343	0.379091	0.893834	0.700419
2513020849	1405001	1415000	0.147742	0.142931	0	0	0.155921	0	0	0	0	0.282576	0.293321	0.291133	0.291527	0	0.435652	0.141168	0	0.144838	0.136776	0.140049	0.147171	0.275247	0.277601	0.149285	0.298667	0.405527	0.259778	0.250294	0.415082	0.328945	0.856199	0.635263	0.279201	0.452054	0.377739	0.881458	0.700419
2513020849	1410001	1420000	0	0	0	0.798838	0.155921	0	0	0	0	0	0	0	0	0	0	0	0	0	0	0	0	0	0	0	0	0	0	0.230474	0.393856	0.284456	0.804751	0.601404	0.279191	0.440824	0.377739	0.872572	0.700419
2513020849	1415001	1425000	0	0	0	0.798838	0	0	0	0	0	0.144394	0	0	0	0	0	0.145923	0	0	0.141438	0.142765	0.153654	0.143031	0.146914	0	0	0.140527	0	0.238928	0.390502	0.30344	0.804015	0.600778	0.279191	0.440824	0.377739	0.872572	0.700419
2513020849	1420001	1430000	0.927719	0.918954	0.973025	1.80308	0.921923	0.853479	0.912216	0.873871	0.829202	0.288789	0.145488	0.609532	0.293321	0.473124	0.429193	0.285464	0.289827	0.297987	0.406008	0.279063	0.433844	0.410462	0.284239	0.448892	0.299361	1.17129	1.1182	0.243323	0.353343	0.207199	0.848278	0.422998	0.279191	0.440824	0.377739	0.875546	0.700419
2513020849	1425001	1435000	0.927719	0.918954	0.973025	0.990109	0.921923	0.853479	0.912216	0.873871	0.829202	0.288789	0.145488	0.609532	0.293321	0.473124	0.582738	0.285464	0.289827	0.297987	0.406008	0.279063	0.433844	0.410462	0.284239	0.448892	0.299361	1.17129	1.1182	0.242391	0.360371	0.259595	0.837981	0.513127	0.279191	0.440824	0.377739	0.872572	0.700419
2513020849	1430001	1440000	0.927719	0.918954	0.973025	0.990109	0.921923	0.853479	0.912216	0.873871	0.829202	0.145065	0.145488	0.609532	0.293321	0.473124	0.582738	0.140049	0.289827	0.297987	0.269295	0.136866	0.285995	0.271449	0.138447	0.448892	0.299361	1.02604	1.1182	0.238645	0.358173	0.241587	0.841693	0.49217	0.279191	0.440824	0.377739	0.872572	0.700419
2513020849	1435001	1445000	0	0	0	0	0	0	0	0	0	0	0	0	0	0	0.14885	0	0	0	0.140844	0	0	0	0	0	0	0	0	0.235801	0.38335	0.322605	0.807264	0.628878	0.279191	0.440824	0.377739	0.872572	0.700419
2513020849	1440001	1450000	0	0	0	0	0	0	0	0	0	0	0	0	0	0	0	0	0	0	0.140844	0	0	0	0	0	0	0	0	0.238006	0.383184	0.320999	0.80863	0.629784	0.279191	0.440824	0.377739	0.872572	0.700419
2513020849	1445001	1455000	0	0	0	0	0	0	0	0	0	0	0	0	0	0	0	0	0	0	0.283427	0	0	0.144394	0	0	0	0	0	0.242923	0.376416	0.327707	0.809531	0.629134	0.279191	0.440824	0.377739	0.872572	0.700419
2513020849	1450001	1460000	0	0	0	0	0	0	0	0	0	0	0	0	0	0	0	0	0	0	0.142634	0	0	0.144394	0	0	0	0	0	0.240307	0.381467	0.318253	0.814183	0.625131	0.279191	0.440824	0.377739	0.872572	0.700419
2513020849	1455001	1465000	0	0	0	0	0	0	0	0	0	0	0	0	0	0	0	0	0	0	0.142634	0	0	0.144394	0	0	0	0	0	0.24038	0.38135	0.318408	0.814149	0.625162	0.279191	0.440824	0.377739	0.872572	0.700419
2513020849	1460001	1470000	0	0	0	0	0	0	0	0	0	0	0.15628	0	0	0	0	0.152678	0	0	0.147388	0	0	0	0	0	0	0	0	0.239079	0.388972	0.313901	0.806693	0.636014	0.279191	0.440824	0.377739	0.872572	0.700419
2513020849	1465001	1475000	0	0	0	0	0	0	0	0	0	0	0.15628	0	0	0	0	0.152678	0	0	0.147388	0	0	0	0	0	0	0	0	0.237531	0.388705	0.312448	0.811313	0.630256	0.279191	0.440824	0.377739	0.872572	0.700419
2513020849	1470001	1480000	0	0	0	0	0	0	0	0	0	0	0.15628	0	0	0	0	0.152678	0	0	0.147388	0	0	0	0	0	0	0	0	0.23742	0.388687	0.312208	0.81167	0.629742	0.279191	0.440824	0.377739	0.872572	0.700419
2513020849	1475001	1485000	0.446693	0	0	0	0	0	0	0	0	0.564673	0.583853	0.735424	0.730219	0.431463	0.713497	0.139162	0.727637	0.865061	0.410664	0.549466	0.441126	0.409469	0.139585	0.601376	0.755712	0.409338	0.39879	0.203959	0.452643	0.400388	0.831579	0.70932	0.279191	0.481898	0.430462	0.872572	0.746388
2513020849	1480001	1490000	0.446693	0	0	0	0	0	0	0	0	0.564673	0.583853	0.735424	0.730219	0.431463	0.713497	0.139162	0.727637	0.865061	0.410664	0.549466	0.441126	0.409469	0.139585	0.601376	0.755712	0.409338	0.39879	0.200091	0.46166	0.412385	0.833628	0.719392	0.279191	0.489739	0.438597	0.872572	0.755746
2513020849	1485001	1495000	0.446693	0	0	0	0	0	0	0	0	0.564673	0.583853	0.735424	0.730219	0.431463	0.713497	0.139162	0.727637	0.865061	0.410664	0.549466	0.441126	0.409469	0.139585	0.601376	0.755712	0.409338	0.39879	0.208066	0.44341	0.386084	0.830656	0.697333	0.279191	0.474114	0.41735	0.872572	0.737039
2513020849	1490001	1500000	0	0	0.1614	0	0	0	0	0	0	0	0	0	0	0	0	0	0	0	0	0	0	0.149681	0	0	0	0	0	0.237555	0.386373	0.30898	0.813832	0.619108	0.279191	0.440824	0.377739	0.872572	0.700419
2513020849	1495001	1505000	0	0	0.1614	0	0	0	0	0	0	0	0	0	0	0	0	0	0	0	0	0	0	0.149681	0	0	0	0.143716	0	0.237851	0.385963	0.311138	0.818242	0.614743	0.279191	0.440824	0.377739	0.872572	0.700419
2513020849	1500001	1510000	0	0	0.1614	0	0	0	0	0	0	0	0	0	0	0	0	0	0	0	0	0	0	0.149681	0	0	0	0.143716	0	0.237631	0.386268	0.310902	0.817981	0.615778	0.279191	0.440824	0.377739	0.872572	0.700419
2513020849	1505001	1515000	0	0	0	0	0	0	0	0	0	0	0	0	0	0	0	0	0	0	0	0	0	0	0	0	0	0.143716	0	0.236051	0.388488	0.310838	0.819642	0.620687	0.279191	0.440824	0.377739	0.872572	0.700419
2513020849	1510001	1520000	0	0	0	0	0	0	0	0	0	0	0	0	0	0	0	0	0	0	0	0	0	0	0	0	0	0	0	0.236051	0.388488	0.309227	0.816099	0.623295	0.279191	0.440824	0.377739	0.872572	0.700419
2513020849	1515001	1525000	0	0	0	0	0	0	0	0	0	0	0	0	0	0	0	0	0	0	0	0	0	0	0	0	0	0	0	0.236051	0.388488	0.310672	0.815926	0.624304	0.279191	0.440824	0.377739	0.872572	0.700419
2513020849	1520001	1530000	0	0	0	0	0	0	0	0	0	0	0	0	0	0	0	0	0	0	0	0	0	0	0	0	0	0	0	0.236051	0.388488	0.311661	0.815786	0.625001	0.279191	0.440824	0.377739	0.872572	0.700419
2513020849	1525001	1535000	0	0	0	0.17116	0.164132	0	0	0	0	0	0	0	0	0	0	0	0	0	0	0	0	0	0	0	0	0	0	0.23263	0.390231	0.29689	0.810604	0.61366	0.279191	0.440824	0.377739	0.872572	0.700419
2513020849	1530001	1540000	0	0	0	0.17116	0.164132	0.146535	0.15024	0	0	0	0	0	0	0	0	0	0	0	0	0	0	0	0	0.158834	0	0.139188	0.134306	0.235999	0.387099	0.308082	0.834939	0.593455	0.279191	0.440824	0.377739	0.872572	0.700419
2513020849	1535001	1545000	0	0	0	0.317834	0.164132	0.146535	0.15024	0	0	0	0	0	0	0	0	0	0	0	0	0	0	0	0	0.158834	0	0.139188	0.134306	0.234411	0.388566	0.299984	0.838955	0.573134	0.279191	0.440824	0.377739	0.872572	0.700419
2513020849	1540001	1550000	0	0	0	0.151472	0	0.146535	0.15024	0	0	0	0	0	0	0	0	0	0	0	0	0	0	0	0	0.158834	0	0.139188	0.134306	0.242639	0.384181	0.329642	0.876896	0.532413	0.279191	0.440824	0.377739	0.898063	0.700419
2513020849	1545001	1555000	0	0	0	0.151472	0	0	0	0	0	0	0	0	0	0	0	0	0	0	0	0	0	0	0	0	0	0	0	0.807279	0.803083	0.313869	0.88978	0.754926	0.822511	0.817559	0.377739	0.906568	0.788789
2513020849	1550001	1560000	0	0	0	0	0	0	0	0	0	0	0	0	0	0	0	0	0	0	0	0	0	0	0	0	0	0	0	0.236051	0.388488	0.309227	0.816099	0.623295	0.279191	0.440824	0.377739	0.872572	0.700419
2513020849	1555001	1565000	0	0	0	0	0	0	0	0	0	0	0	0	0	0	0	0	0	0	0	0	0	0	0	0	0	0	0	0.236051	0.388488	0.309227	0.816099	0.623295	0.279191	0.440824	0.377739	0.872572	0.700419
2513020849	1560001	1570000	0	0	0	0	0	0	0	0	0	0	0	0	0	0	0	0	0	0	0	0	0	0	0	0	0	0	0	0.236051	0.388488	0.309227	0.816099	0.623295	0.279191	0.440824	0.377739	0.872572	0.700419
2513020849	1565001	1575000	0	0	0	0	0	0	0	0	0	0	0	0	0	0	0	0	0	0	0	0	0	0	0	0	0	0	0	NA	NA	NA	NA	NA	NA	NA	NA	NA	NA
2513020850	1	10000	0.152093	0	0	0	0	0	0.146494	0	0	0.462295	0	0	0.32395	0	0.146044	0	0	0.148946	0.140498	0.142439	0	0.142765	0.144069	0.478525	0	0.698872	0.55419	0.236843	0.398762	0.362753	0.870462	0.589897	0.279191	0.44158	0.39573	0.893013	0.700419
2513020850	5001	15000	0.152093	0	0	0	0	0	0.146494	0	0	0	0	0	0	0	0	0	0	0	0	0	0	0.142765	0	0	0	0	0.13399	0.236593	0.379891	0.31405	0.82239	0.606224	0.279191	0.440824	0.377739	0.872572	0.700419
2513020850	10001	20000	0.152093	0	0	0	0	0	0.146494	0	0	0.153906	0.157018	0.160119	0.164132	0.155851	0.157475	0.15564	0.161685	0.156498	0.15024	0.148755	0.158587	0.291212	0.153717	0.164241	0.164905	0.145372	0.271037	0.235476	0.395869	0.351939	0.831893	0.634426	0.279191	0.440824	0.386417	0.872572	0.700419
2513020850	15001	25000	0.1525	0.295753	0	0.138176	0.280376	0.135724	0.413945	0.278797	0	0.153906	0.157018	0.154098	0.298472	0.144615	0.149581	0.430729	0.297132	0.149042	0.141837	0.426263	1.18483	0.567225	0.146452	0.318001	0.303279	0.140132	0.272077	0.310078	0.377275	0.404199	0.826267	0.645341	0.3358	0.440824	0.433775	0.872572	0.700419
2513020850	20001	30000	0.1525	0.295753	0	0.138176	0.280376	0.135724	0.413945	0.278797	0	0.153906	0.157018	0.154098	0.298472	0.144615	0.149581	0.430729	0.297132	0.149042	0.141837	0.426263	1.18483	0.567225	0.146452	0.318001	0.303279	0.140132	0.272077	0.305675	0.377729	0.398643	0.825962	0.644185	0.331334	0.440824	0.428974	0.872572	0.700419
2513020850	25001	35000	0.1525	0.295753	0	0.138176	0.280376	0.135724	0.413945	0.278797	0	0	0	0	0.149236	0	0	0.287083	0.148519	0	0	0.282396	1.03672	0.42514	0	0.154292	0.151639	0	0.135276	0.346819	0.338927	0.343885	0.789612	0.59386	0.372196	0.440824	0.382748	0.872572	0.700419
2513020850	30001	40000	0	0	0	0.148012	0	0	0	0	0	0	0.147608	0	0	0	0	0	0	0	0.281168	0	0	0	0.143335	0	0	0.142215	0	0.23862	0.380457	0.324196	0.820704	0.616386	0.279191	0.440824	0.377739	0.872572	0.700419
2513020850	35001	45000	0	0	0	0.148012	0	0	0	0.148755	0	0	0.147608	0	0	0	0	0	0	0	0.281168	0	0	0	0.143335	0	0	0.142215	0	0.240651	0.375629	0.317529	0.820921	0.620618	0.279191	0.440824	0.377739	0.872572	0.700419
2513020850	40001	50000	0	0	0	0.148012	0	0	0	0.148755	0	0	0.147608	0	0	0	0	0.144431	0	0	0.281168	0	0	0	0.143335	0	0	0.135683	0	0.241672	0.381094	0.321873	0.816115	0.624882	0.279191	0.440824	0.377739	0.872572	0.700419
2513020850	45001	55000	0	0	0	0	0	0	0	0.148755	0	0	0	0	0	0	0	0.144431	0	0.151808	0	0	0	0	0	0	0	0	0	0.233126	0.384019	0.315746	0.810623	0.63145	0.279191	0.440824	0.377739	0.872572	0.700419
2513020850	50001	60000	0	0	0	0	0	0	0	0	0	0	0	0	0	0	0	0.144431	0	0.151808	0	0	0	0	0	0	0	0	0	0.231022	0.390585	0.317335	0.809814	0.628921	0.279191	0.440824	0.377739	0.872572	0.700419
2513020850	55001	65000	0	0	0	0	0	0	0	0	0	0	0	0	0	0	0	0	0	0.151808	0	0	0	0	0	0	0	0	0	0.231408	0.387318	0.310864	0.814532	0.624563	0.279191	0.440824	0.377739	0.872572	0.700419
2513020850	60001	70000	0	0	0	0	0	0	0	0	0	0	0	0	0	0	0	0	0	0	0	0	0	0	0	0	0	0	0	0.236051	0.388488	0.309227	0.816099	0.623295	0.279191	0.440824	0.377739	0.872572	0.700419
2513020850	65001	75000	0	0	0	0	0	0	0.158669	0	0	0	0	0	0	0	0	0	0	0	0	0	0	0.143751	0	0	0	0	0	0.238012	0.384687	0.308396	0.817021	0.623233	0.279191	0.440824	0.377739	0.872572	0.700419
2513020850	70001	80000	0	0	0	0.156498	0	0	0.158669	0	0	0	0	0	0	0	0	0	0	0	0	0	0	0.143751	0	0	0	0	0	0.238261	0.38336	0.303718	0.815508	0.61936	0.279191	0.440824	0.377739	0.872572	0.700419
2513020850	75001	85000	0	0	0	0.156498	0	0	0.158669	0	0	0	0	0	0	0	0	0	0	0	0	0	0	0.143751	0	0	0	0	0	0.237476	0.385141	0.305622	0.815741	0.620725	0.279191	0.440824	0.377739	0.872572	0.700419
2513020850	80001	90000	0	0	0	0.156498	0	0	0	0	0	0	0	0	0	0	0	0	0	0	0	0	0	0	0	0	0	0	0	0.235614	0.388931	0.307306	0.815179	0.62154	0.279191	0.440824	0.377739	0.872572	0.700419
2513020850	85001	95000	0	0	0	0.152442	0	0	0	0	0	0	0	0	0	0	0	0	0	0	0	0	0	0	0	0	0	0	0	0.235736	0.388806	0.307844	0.815437	0.622031	0.279191	0.440824	0.377739	0.872572	0.700419
2513020850	90001	100000	0	0	0	0.152442	0	0	0	0	0	0	0	0	0	0	0	0	0	0	0.140441	0	0	0	0.144249	0	0	0	0	0.236946	0.387704	0.309776	0.815211	0.621996	0.279191	0.440824	0.377739	0.872572	0.700419
2513020850	95001	105000	0.451977	0	0.277908	0.153343	0.421069	0.546838	0	0	0	0.570929	0.58681	0.592596	0.58903	0.578459	0.578755	0.562336	0.438011	0.431252	0.546221	0.549189	0.740517	0.696596	0.705544	0.605006	0.613126	0.682448	0.655798	0.235799	0.406193	0.342409	0.832745	0.634508	0.279191	0.447112	0.381954	0.872572	0.700419
2513020850	100001	110000	0.451977	0	0.277908	0	0.421069	0.546838	0	0	0	0.570929	0.58681	0.592596	0.58903	0.578459	0.578755	0.562336	0.438011	0.431252	0.546221	0.549189	0.740517	0.696596	0.705544	0.605006	0.613126	0.682448	0.655798	0.236229	0.407694	0.348054	0.835271	0.637124	0.279191	0.447294	0.383926	0.872572	0.700419
2513020850	105001	115000	0.451977	0	0.277908	0	0.421069	0.546838	0	0	0	0.570929	0.58681	0.592596	0.58903	0.578459	0.578755	0.562336	0.438011	0.431252	0.4096	0.549189	0.740517	0.696596	0.564317	0.605006	0.613126	0.823232	0.655798	0.234779	0.409962	0.348577	0.838601	0.63577	0.279191	0.448858	0.384147	0.872572	0.700419
2513020850	110001	120000	0	0	0	0	0	0	0	0	0	0	0	0	0	0	0	0	0	0	0.140216	0	0	0	0	0	0	0.141713	0	0.236423	0.387335	0.313378	0.821783	0.622985	0.279191	0.440824	0.377739	0.872572	0.700419
2513020850	115001	125000	0	0	0	0	0	0	0	0	0	0	0	0	0	0	0	0	0	0	0.138851	0.14016	0	0	0.142278	0	0	0.141713	0	0.235255	0.384532	0.318702	0.822515	0.622899	0.279191	0.440824	0.377739	0.872572	0.700419
2513020850	120001	130000	0	0	0	0	0	0	0	0	0	0	0	0	0	0	0	0.144726	0.148946	0.147787	0.138851	0.280488	0	0	0.142278	0	0	0	0	0.227851	0.385939	0.332881	0.808688	0.632875	0.279191	0.440824	0.377739	0.872572	0.700419
2513020850	125001	135000	0	0	0	0	0	0	0	0.143233	0.135498	0	0	0	0	0	0	0.144726	0.148946	0.147787	0.13732	0.280488	0	0	0.142278	0	0	0	0	0.23069	0.379656	0.331021	0.809924	0.632996	0.279191	0.440824	0.377739	0.872572	0.700419
2513020850	130001	140000	0	0	0	0.293828	0	0.141138	0.147432	0.143233	0.135498	0	0	0	0	0	0	0.144726	0.148946	0.147787	0.137068	0.1403	0	0	0.141744	0	0	0	0	0.233884	0.378059	0.313788	0.808576	0.629704	0.279191	0.440824	0.377739	0.872572	0.700419
2513020850	135001	145000	0.166545	0	0	0.293828	0	0.141138	0.147432	0.143233	0.135498	0.150712	0	0	0	0	0	0	0	0	0.137068	0.146411	0	0	0.141744	0	0	0	0.139057	0.235999	0.375769	0.297519	0.818754	0.609343	0.279191	0.440824	0.377739	0.872572	0.700419
2513020850	140001	150000	0.166545	0	0	0.293743	0	0.141138	0.147432	0	0	0.150712	0	0	0	0	0	0	0	0	0	0.146411	0	0	0.141744	0	0	0	0.139057	0.234424	0.384573	0.300445	0.817142	0.611522	0.279191	0.440824	0.377739	0.872572	0.700419
2513020850	145001	155000	0.319362	0	0	0	0	0	0.147258	0	0.138522	0.294428	0.148613	0.148566	0	0.148012	0	0.143891	0.147128	0.147832	0.138826	0.287292	0.147301	0.139162	0	0.150712	0	0	0.266584	0.222543	0.386154	0.321221	0.813395	0.6135	0.279191	0.440824	0.377739	0.872572	0.700419
2513020850	150001	160000	0.15462	0	0	0	0	0	0.147258	0	0.138522	0.144322	0.148613	0.148566	0	0.148012	0	0.143891	0.147128	0.147832	0.138826	0.141288	0.147301	0.139162	0	0.150712	0	0	0.132778	0.220292	0.388762	0.332375	0.808429	0.628703	0.279191	0.440824	0.377739	0.872572	0.700419
2513020850	155001	165000	0.15462	0	0	0.148994	0	0	0.147258	0	0.138522	0.144322	0.148613	0.148566	0	0.148012	0	0.143891	0.147128	0.147832	0.138826	0.141288	0.147301	0.139162	0	0.150712	0	0	0.132778	0.0900521	0.41928	0.603212	0.702628	0.648167	0.279191	0.455372	0.619262	0.872572	0.700419
2513020850	160001	170000	0	0	0	0.148994	0	0	0	0	0	0	0	0	0	0	0	0	0	0	0	0	0	0	0	0	0	0	0	0.807279	0.803083	0.313869	0.88978	0.754926	0.822511	0.817559	0.377739	0.906568	0.788789
2513020850	165001	175000	0	0	0.141228	0.148994	0	0	0	0	0	0	0	0	0	0	0.149731	0.15098	0	0	0.144838	0	0	0.146288	0.147608	0	0	0	0.13212	0.203639	0.653629	0.223255	0.966065	0.839081	0.279191	0.677034	0.377739	0.966879	0.861344
2513020850	170001	180000	0	0	0.286535	0.147171	0	0.141652	0	0	0	0.289082	0	0	0	0	0.149731	0.432639	0.302503	0.294602	0.422097	0.140844	0	0.421324	0.147608	0	0	0	0.396361	0.612869	0.662145	0.0316653	0.930323	0.275762	0.63533	0.685257	0.377739	0.938221	0.700419
2513020850	175001	185000	0	0.147608	0.286535	0.295306	0	0.141652	0	0	0	0.433183	0.146661	0	0	0	0.149731	0.432639	0.302503	0.294602	0.562797	0.140844	0	0.560752	0.147608	0	0	0	0.397434	0.497821	0.586318	0.122532	0.863263	0.139061	0.521987	0.613204	0.377739	0.88716	0.700419
2513020850	180001	190000	0	0.147608	0.145567	0.295306	0	0.141652	0	0	0	0.433183	0.146661	0	0	0	0	0.28821	0.302503	0.294602	0.42048	0.140844	0	0.419733	0	0	0	0	0.265691	0.801996	0.678171	0.298488	0.793288	0.092117	0.819236	0.70123	0.377739	0.872572	0.700419
2513020850	185001	195000	0	0.147608	0	0.148149	0	0	0	0	0	0.142997	0.146661	0	0	0	0	0	0	0	0.140216	0	0	0.139802	0	0	0	0	0	0.245535	0.376388	0.28963	0.796238	0.602565	0.279191	0.440824	0.377739	0.872572	0.700419
2513020850	190001	200000	0	0	0.155993	0	0.156136	0	0.159338	0	0	0	0	0	0	0	0	0	0	0	0	0.147388	0	0	0	0	0	0	0	0.231131	0.383344	0.299447	0.810039	0.615153	0.279191	0.440824	0.377739	0.872572	0.700419
2513020850	195001	205000	0	0	0.155993	0	0.156136	0	0.159338	0	0	0	0	0	0	0	0	0	0	0	0	0.147388	0	0	0	0	0	0	0	0.232435	0.384714	0.302039	0.81167	0.61733	0.279191	0.440824	0.377739	0.872572	0.700419
2513020850	200001	210000	0	0	0.155993	0	0.156136	0	0.159338	0	0	0	0	0	0	0	0	0	0	0.153098	0	0.147388	0	0	0	0	0	0	0	0.224639	0.38251	0.303105	0.808746	0.618235	0.279191	0.440824	0.377739	0.872572	0.700419
2513020850	205001	215000	0	0	0	0	0	0	0	0	0	0	0	0	0	0	0	0	0	0.153098	0	0	0	0	0	0	0	0	0	0.229697	0.386886	0.309934	0.815651	0.626415	0.279191	0.440824	0.377739	0.872572	0.700419
2513020850	210001	220000	0	0.162871	0	0.158669	0	0	0	0	0	0	0	0	0	0	0	0	0	0.153098	0	0	0	0	0	0	0	0	0	0.232126	0.387759	0.303903	0.811692	0.620025	0.279191	0.440824	0.377739	0.872572	0.700419
2513020850	215001	225000	0	0.162871	0	0.158669	0	0	0	0	0	0	0	0	0	0	0	0	0	0	0	0	0	0	0	0	0	0	0.145803	0.238592	0.387898	0.304046	0.821324	0.612493	0.279191	0.440824	0.377739	0.872572	0.700419
2513020850	220001	230000	0	0.162871	0	0.158669	0	0	0	0	0	0	0	0	0	0	0	0	0	0	0	0	0.875539	0	0	0	0	0	0.145803	0.250178	0.38141	0.324958	0.820736	0.607906	0.279201	0.440824	0.377739	0.872572	0.700419
2513020850	225001	235000	0	0	0	0.148755	0	0	0	0	0	0	0	0	0	0	0	0	0	0	0	0	0.875539	0	0	0	0	0	0.145803	0.245394	0.383041	0.324288	0.821944	0.614655	0.279191	0.440824	0.377739	0.872572	0.700419
2513020850	230001	240000	0	0	0	0.148755	0	0	0	0	0	0	0	0	0	0	0	0	0	0	0	0	0.875539	0	0	0	0	0	0	0.243914	0.384153	0.321592	0.815444	0.619243	0.279191	0.440824	0.377739	0.872572	0.700419
2513020850	235001	245000	0	0	0	0.148755	0	0	0	0	0	0	0	0	0	0	0	0	0	0	0	0	0	0	0	0	0	0	0	0.235622	0.388923	0.307342	0.815196	0.621572	0.279191	0.440824	0.377739	0.872572	0.700419
2513020850	240001	250000	0	0	0	0	0	0	0	0	0	0	0	0	0	0	0	0.146619	0	0	0	0	0	0	0	0	0	0	0.13361	0.238432	0.390334	0.313062	0.820259	0.620672	0.279191	0.440824	0.377739	0.872572	0.700419
2513020850	245001	255000	0	0	0	0	0	0	0	0	0	0	0	0	0	0	0.148613	0.146619	0	0	0.138775	0	0	0.141378	0	0	0	0	0.13361	0.23961	0.385739	0.318155	0.816539	0.623798	0.279191	0.440824	0.377739	0.872572	0.700419
2513020850	250001	260000	0	0	0	0	0	0	0	0	0	0	0	0	0	0	0.148613	0.146619	0	0	0.138775	0.146004	0	0.287014	0.149236	0	0	0	0.13361	0.242128	0.379054	0.330161	0.817843	0.623585	0.279191	0.440824	0.377739	0.872572	0.700419
2513020850	255001	265000	0.158102	0	0	0	0	0	0	0	0	0	0	0	0	0	0.148613	0	0	0	0.138598	0.141713	0	0.282756	0.149236	0	0	0	0	0.234522	0.374779	0.320339	0.805894	0.618949	0.279191	0.440824	0.377739	0.872572	0.700419
2513020850	260001	270000	0.158102	0	0	0	0	0	0	0	0	0	0	0	0	0	0	0	0	0	0	0.141713	0	0.1419	0.149236	0	0	0	0	0.231706	0.379296	0.313995	0.810327	0.610971	0.279191	0.440824	0.377739	0.872572	0.700419
2513020850	265001	275000	0.156498	0	0	0	0	0	0	0	0	0	0	0	0	0	0	0	0	0	0	0	0	0	0	0	0	0	0	0.229478	0.386309	0.302756	0.807457	0.609575	0.279191	0.440824	0.377739	0.872572	0.700419
2513020850	270001	280000	0	0	0	0	0	0	0	0	0	0	0	0	0	0	0	0	0	0	0	0	0	0	0	0	0	0	0	NA	NA	NA	NA	NA	NA	NA	NA	NA	NA
2513020850	275001	285000	0	0	0	0	0	0	0	0	0	0	0	0	0	0	0	0	0	0	0	0	0	0	0	0	0	0.145294	0	0.236051	0.388488	0.419766	0.940489	0.491053	0.279191	0.440824	0.445251	0.947668	0.700419
2513020850	280001	290000	0	0	0	0	0.159855	0	0	0	0	0	0	0	0	0	0	0	0	0	0	0	0	0	0	0	0	0.145294	0.135196	0.237261	0.386134	0.320612	0.838279	0.599472	0.279191	0.440824	0.377739	0.872572	0.700419
2513020850	285001	295000	0	0	0	0	0.159855	0	0	0	0	0	0	0	0	0	0	0	0	0	0	0	0	0	0	0	0	0.145294	0.135196	0.236976	0.386664	0.317988	0.833377	0.604951	0.279191	0.440824	0.377739	0.872572	0.700419
2513020850	290001	300000	0	0	0	0	0.159855	0	0	0	0	0	0	0	0	0	0	0	0	0	0	0	0	0	0	0	0	0	0.135196	0.23674	0.387113	0.313448	0.824209	0.613364	0.279191	0.440824	0.377739	0.872572	0.700419
2513020850	295001	305000	0	0	0	0	0	0	0	0	0	0	0	0	0	0	0	0	0.150765	0	0	0	0	0	0	0	0	0	0	0.238042	0.388488	0.313741	0.810457	0.6278	0.279191	0.440824	0.377739	0.872572	0.700419
2513020850	300001	310000	0	0	0	0	0	0	0	0	0	0	0	0	0	0	0	0	0.150765	0	0	0	0	0	0	0	0	0	0	0.236856	0.388488	0.311061	0.81379	0.625129	0.279191	0.440824	0.377739	0.872572	0.700419
2513020850	305001	315000	0	0	0	0	0	0	0	0	0	0	0	0	0	0	0	0	0.150765	0	0	0	0	0	0	0	0	0	0.141288	0.23833	0.387294	0.313991	0.82197	0.619527	0.279191	0.440824	0.377739	0.872572	0.700419
2513020850	310001	320000	0.178018	0	0	0	0.34232	0	0	0.165476	0.157786	0.154357	0.156136	0.162669	0.162073	0.159681	0.155431	0.149581	0.158424	0.158669	0.147608	0.14909	0.160932	0.147877	0.301002	0.164024	0.331418	0.142183	0.279171	0.237723	0.393612	0.325483	0.830391	0.627697	0.279191	0.440824	0.377739	0.872572	0.700419
2513020850	315001	325000	0.178018	0	0	0	0.34232	0	0	0.165476	0.157786	0.154357	0.156136	0.162669	0.162073	0.159681	0.155431	0.149581	0.158424	0.158669	0.147608	0.14909	0.160932	0.147877	0.301002	0.164024	0.331418	0.142183	0.279171	0.239956	0.400118	0.346418	0.847284	0.633291	0.279191	0.442668	0.383189	0.875281	0.700419
2513020850	320001	330000	0.178018	0	0	0	0.34232	0	0	0.165476	0.157786	0.154357	0.156136	0.162669	0.162073	0.159681	0.155431	0.149581	0.158424	0.158669	0.293913	0.14909	0.160932	0.297795	0.301002	0.164024	0.331418	0.142183	0.13803	0.238681	0.392496	0.331728	0.824582	0.636174	0.279191	0.440824	0.377739	0.872572	0.700419
2513020850	325001	335000	0	0	0	0	0	0	0	0	0	0	0	0	0	0.151306	0	0	0	0	0.146329	0	0	0.291927	0	0	0	0	0	0.234211	0.380809	0.320986	0.811815	0.628731	0.279191	0.440824	0.377739	0.872572	0.700419
2513020850	330001	340000	0	0	0	0	0	0	0	0	0	0	0	0	0	0.151306	0	0	0	0	0.146329	0	0	0.291927	0	0	0	0	0	0.23434	0.381358	0.320121	0.812129	0.628334	0.279191	0.440824	0.377739	0.872572	0.700419
2513020850	335001	345000	0	0	0	0	0	0	0	0	0	0	0	0	0	0.151306	0	0	0	0	0	0	0	0.142699	0	0	0	0	0	0.229717	0.382467	0.318248	0.808575	0.630298	0.279191	0.440824	0.377739	0.872572	0.700419
2513020850	340001	350000	0	0	0	0	0	0	0	0	0	0	0	0	0	0	0	0	0	0	0	0	0	0	0	0	0	0	0	0.236051	0.388488	0.309227	0.816099	0.623295	0.279191	0.440824	0.377739	0.872572	0.700419
2513020850	345001	355000	0	0	0	0.145449	0	0	0	0	0	0	0	0	0	0	0	0	0	0	0	0	0	0	0	0	0	0.798093	0	0.235289	0.389269	0.330507	0.840809	0.597619	0.279191	0.440824	0.377739	0.872572	0.700419
2513020850	350001	360000	0	0.144763	0.137624	0.145449	0	0	0	0	0	0.141378	0	0	0.291055	0	0	0.142375	0	0	0.135704	0.143646	0.143751	0	0	0.302613	0.299562	0.932314	0.257433	0.249405	0.416973	0.344087	0.856231	0.596089	0.279191	0.453282	0.382748	0.881458	0.700419
2513020850	355001	365000	0	0.144763	0.137624	0.141109	0	0	0	0	0	0.141378	0	0	0.291055	0	0	0.142375	0	0.14752	0.135704	0.143646	0.143751	0	0	0.302613	0.299562	0.932923	0.258269	0.244059	0.420471	0.360429	0.862103	0.59075	0.279191	0.455414	0.393557	0.886734	0.700419
2513020850	360001	370000	0	0.143507	0.137624	0	0	0	0	0	0	0.142183	0	0	0.291133	0	0	0.142375	0	0.14752	0.135704	0.143646	0.143751	0	0	0.302613	0.299562	0.134532	0.260552	0.241511	0.407671	0.325507	0.831407	0.620311	0.279191	0.447294	0.377739	0.872572	0.700419
2513020850	365001	375000	0	0	0.147301	0	0	0	0	0	0	0	0	0	0	0	0	0	0	0.150292	0	0	0	0	0	0	0	0	0.136359	0.23304	0.386703	0.312812	0.819229	0.615763	0.279191	0.440824	0.377739	0.872572	0.700419
2513020850	370001	380000	0	0	0.147301	0.158587	0	0	0	0	0	0.144504	0	0	0	0.153098	0.149139	0	0.15564	0	0.143233	0	0	0.285072	0	0	0	0	0.273956	0.237124	0.380694	0.315666	0.816375	0.614144	0.279191	0.440824	0.377739	0.872572	0.700419
2513020850	375001	385000	0.158102	0	0.147301	0.467978	0	0.141621	0	0	0	0.144504	0	0	0	0.153098	0.149139	0	0.15564	0	0.143233	0	0	0.285072	0	0	0	0	0.273956	0.234578	0.381999	0.309551	0.812508	0.607356	0.279191	0.440824	0.377739	0.872572	0.700419
2513020850	380001	390000	0.158102	0	0	0.467978	0	0.141621	0	0	0	0.144504	0	0	0	0.153098	0.149139	0	0.15564	0	0.143233	0	0	0.285072	0	0	0	0	0.135236	0.233456	0.382016	0.310274	0.807921	0.612742	0.279191	0.440824	0.377739	0.872572	0.700419
2513020850	385001	395000	0.158102	0	0	0.310862	0	0.141621	0	0	0	0	0	0	0	0	0	0	0	0	0	0	0.151865	0	0	0	0	0	0	0.235122	0.387287	0.30673	0.813211	0.615225	0.279191	0.440824	0.377739	0.872572	0.700419
2513020850	390001	400000	0	0	0	0	0	0	0	0	0	0	0	0	0	0	0	0	0	0	0	0	0.151865	0	0	0	0	0	0	0.237573	0.387577	0.310321	0.818033	0.624342	0.279191	0.440824	0.377739	0.872572	0.700419
2513020850	395001	405000	0	0	0	0	0	0	0	0	0	0	0	0	0	0	0	0	0	0	0	0	0.151865	0	0	0	0	0	0	0.237463	0.387642	0.310241	0.8179	0.624266	0.279191	0.440824	0.377739	0.872572	0.700419
2513020850	400001	410000	0	0	0	0	0	0	0	0	0	0	0	0	0	0	0	0	0	0	0	0.139398	0	0	0	0	0	0	0	0.234277	0.387867	0.309527	0.816664	0.624485	0.279191	0.440824	0.377739	0.872572	0.700419
2513020850	405001	415000	0	0	0	0	0	0	0	0	0	0	0	0	0	0	0	0	0	0	0	0.139398	0	0	0	0	0	0	0	0.233617	0.387637	0.310877	0.815513	0.623825	0.279191	0.440824	0.377739	0.872572	0.700419
2513020850	410001	420000	0	0	0	0	0	0	0	0	0	0	0	0	0	0	0	0	0	0	0	0.139398	0	0	0	0	0	0	0	0.231901	0.387037	0.31206	0.815096	0.624207	0.279191	0.440824	0.377739	0.872572	0.700419
2513020850	415001	425000	0	0	0	0	0	0	0	0	0	0	0	0	0	0	0	0	0	0	0	0	0	0	0	0	0	0	0	NA	NA	NA	NA	NA	NA	NA	NA	NA	NA
2513020851	1	10000	0	0	0	0	0	0	0	0	0	0	0	0	0	0	0	0	0	0	0.139109	0.279171	0	0	0	0	0	0	0	0.19914	0.368497	0.344802	0.803083	0.652189	0.279191	0.440824	0.382826	0.872572	0.700543
2513020851	5001	15000	0	0	0	0.148707	0	0	0	0	0	0	0	0	0	0	0	0	0	0	0	0.139666	0	0	0	0	0	0	0	0.211282	0.386612	0.302908	0.800447	0.60915	0.279191	0.440824	0.377739	0.872572	0.700419
2513020851	10001	20000	0	0	0	0.301424	0	0	0	0	0	0	0	0	0	0	0	0	0	0	0	0	0	0	0	0	0	0	0	0.359453	0.752306	0.140438	0.739506	0.479003	0.384711	0.770496	0.377739	0.872572	0.700419
2513020851	15001	25000	0	0	0	0.446122	0	0	0	0	0	0	0	0	0	0	0	0	0	0	0.142798	0	0	0	0	0	0	0	0	0.493474	0.810378	0.261061	0.689942	0.623774	0.518143	0.824278	0.377739	0.872572	0.700419
2513020851	20001	30000	0	0	0	0.295843	1.58437	0.277195	1.14778	0	0	0	0.433733	0	0.721065	2.28583	1.55285	0.420816	3.77866	1.99056	1.35196	2.15313	2.41711	2.70232	1.67406	1.90442	0.604135	0	0	0.366409	0.390106	3.913e-06	0.00942248	0.0430053	0.390748	0.440824	0.00232432	0.872572	0.700419
2513020851	25001	35000	0	0	0	0.143998	1.58437	0.277195	1.14778	0	0	0	0.433733	0	0.721065	2.28583	1.55285	0.420816	3.77866	1.99056	1.35196	2.15313	2.41711	2.70232	1.67406	1.90442	0.604135	0	0	0.123215	0.181923	0.00226297	0.040452	0.399679	0.279191	0.440824	0.268841	0.872572	0.700419
2513020851	30001	40000	0	0	0	0	1.58437	0.277195	1.14778	0	0	0	0.433733	0	0.721065	2.28583	1.55285	0.5612	3.77866	1.99056	1.35196	2.15313	2.56332	2.70232	1.67406	1.90442	0.604135	0	0	0.115074	0.217042	0.242138	0.252535	0.861854	0.279191	0.440824	0.377739	0.872572	0.879624
2513020851	35001	45000	0	0	0	0	0	0	0	0	0	0	0	0	0.143927	0.142864	0	0.141438	0	0	0.135745	0.1344	0.145527	0.134156	0	0	0	0	0	0.236057	0.392264	0.32562	0.81257	0.64146	0.279191	0.440824	0.377739	0.872572	0.700419
2513020851	40001	50000	0	0	0	0	0	0	0	0	0	0	0	0	0.143927	0.142864	0	0.141438	0	0	0.135745	0.134841	0.145527	0.134156	0	0	0	0	0	0.23603	0.391895	0.324062	0.812904	0.639776	0.279191	0.440824	0.377739	0.872572	0.700419
2513020851	45001	55000	0	0	0	0	0	0	0	0	0	0	0	0	0.143927	0.142864	0	0	0	0	0	0.134841	0	0.134156	0	0	0	0	0	0.231957	0.390583	0.317395	0.817749	0.635722	0.279191	0.440824	0.377739	0.872572	0.700419
2513020851	50001	60000	0	0	0	0	0	0	0	0	0	0	0	0	0	0	0	0	0	0	0	0	0	0	0	0	0	0	0	0.236051	0.388488	0.309227	0.816099	0.623295	0.279191	0.440824	0.377739	0.872572	0.700419
2513020851	55001	65000	0.153159	0.152917	0.149831	0.154357	0.148333	0.143335	0	0	0.141931	0.140356	0	0	0	0	0.144801	0.278957	0	0	0.136798	0.27478	0.146956	0.27116	0	0	0	0.133292	0	0.236577	0.384051	0.312644	0.800422	0.613092	0.279191	0.440824	0.377739	0.872572	0.700419
2513020851	60001	70000	0.153159	0.152917	0.149831	0.154357	0.148333	0.143335	0	0	0.141931	0.140356	0	0	0	0	0.144801	0.278957	0	0	0.136798	0.27478	0.292494	0.27116	0	0	0	0.133292	0	0.238042	0.383326	0.314013	0.800911	0.613607	0.279191	0.440824	0.377739	0.872572	0.700419
2513020851	65001	75000	0.153159	0.152917	0.149831	0.309505	0.148333	0.143335	0	0	0.141931	0.286671	0	0	0.147922	0	0.287712	0.421838	0.296482	0.148241	0.279987	0.27478	0.292494	0.27116	0	0	0	0.133292	0	0.237863	0.387785	0.321936	0.789385	0.626129	0.279191	0.440824	0.377739	0.872572	0.700419
2513020851	70001	80000	0	0.148802	0	0.302944	0.145645	0.14337	0	0	0.14752	0.290435	0.150448	0	0.302176	0	0.290358	0.291846	0.296482	0.148241	0.280209	0.141348	0.145527	0	0	0	0	0	0	0.239387	0.395185	0.306891	0.801337	0.648003	0.279191	0.440824	0.377739	0.872572	0.700419
2513020851	75001	85000	0	0.148802	0	0.302944	0.145645	0.14337	0	0	0.14752	0.290435	0.150448	0	0.302176	0	0.290358	0.433402	0.296482	0.148241	0.553591	0.141348	0	0	0	0	0	0	0.13046	0.240079	0.395604	0.311483	0.805363	0.643717	0.279191	0.440824	0.377739	0.872572	0.700419
2513020851	80001	90000	0	0.148802	0	0.148379	0.145645	0.14337	0	0	0.14752	0.143611	0.150448	0	0.149984	0	0.147742	0.287642	0	0.142536	0.413728	0.141348	0	0.136316	0	0	0	0	0.13046	0.237005	0.38788	0.30756	0.813441	0.630979	0.279191	0.440824	0.377739	0.872572	0.700419
2513020851	85001	95000	0	0	0	0	0	0	0	0	0	0	0	0	0	0	0	0.143233	0	0.142536	0.275153	0	0	0.136316	0	0	0	0	0.13046	0.235392	0.385767	0.31926	0.817148	0.62304	0.279191	0.440824	0.377739	0.872572	0.700419
2513020851	90001	100000	0	0	0	0	0	0	0	0	0	0	0	0	0	0	0	0	0	0.142536	0	0	0	0.136316	0	0	0	0	0	0.231256	0.384454	0.313712	0.81443	0.624778	0.279191	0.440824	0.377739	0.872572	0.700419
2513020851	95001	105000	0	0	0	0	0	0	0	0	0	0	0	0	0	0	0	0	0	0	0	0	0	0	0	0	0	0	0	0.236051	0.388488	0.309227	0.816099	0.623295	0.279191	0.440824	0.377739	0.872572	0.700419
2513020851	100001	110000	0.310313	0.305236	0.298766	0.296574	0.301107	0.292007	0.303957	0.304187	0.291927	0.288935	0.299764	0.307433	0.300792	0.294689	0.294342	0.287222	0.301212	0.297795	0.422011	0.282696	0.295217	0.27901	0.28821	0.307433	0.313143	0.267797	0.258894	0.23592	0.38922	0.309072	0.811111	0.62647	0.279191	0.440824	0.377739	0.872572	0.700419
2513020851	105001	115000	0.310313	0.305236	0.298766	0.296574	0.301107	0.292007	0.303957	0.304187	0.291927	0.288935	0.299764	0.307433	0.300792	0.294689	0.294342	0.430833	0.301212	0.445698	0.422011	0.282696	0.443495	0.419569	0.28821	0.307433	0.313143	0.267797	0.258894	0.235299	0.387772	0.316704	0.809273	0.629036	0.279191	0.440824	0.377739	0.872572	0.700419
2513020851	110001	120000	0.310313	0.305236	0.298766	0.296574	0.301107	0.43765	0.303957	0.304187	0.291927	0.288935	0.299764	0.307433	0.300792	0.294689	0.294342	0.430833	0.301212	0.445698	0.559535	0.282696	0.443495	0.419569	0.28821	0.307433	0.313143	0.267797	0.259239	0.23623	0.386312	0.318038	0.80984	0.626784	0.279191	0.440824	0.377739	0.872572	0.700419
2513020851	115001	125000	0	0	0	0	0	0.144838	0	0	0	0	0	0	0	0	0	0.142798	0	0.148566	0.274687	0	0.148333	0.138103	0	0	0	0	0	0.236611	0.384106	0.323117	0.81068	0.626199	0.279191	0.440824	0.377739	0.872572	0.700419
2513020851	120001	130000	0	0	0	0	0	0.144838	0	0	0	0	0	0	0	0	0	0	0	0	0.274687	0	0	0	0	0	0	0	0	0.237915	0.384522	0.316333	0.813621	0.622294	0.279191	0.440824	0.377739	0.872572	0.700419
2513020851	125001	135000	0	0	0	0	0.141993	0	0	0	0	0	0	0	0	0	0	0	0	0.144322	0.273331	0	0.144322	0.13649	0	0	0	0	0	0.2316	0.375928	0.323076	0.806346	0.627141	0.279191	0.440824	0.377739	0.872572	0.700419
2513020851	130001	140000	0	0	0	0	0.141993	0	0	0	0	0	0	0	0	0	0	0	0	0.144322	0.137695	0	0.144322	0.137	0	0	0	0	0	0.232245	0.380263	0.316762	0.810739	0.624639	0.279191	0.440824	0.377739	0.872572	0.700419
2513020851	135001	145000	0	0	0	0.14105	0.141993	0	0	0	0	0	0	0	0	0	0	0	0	0.144322	0.137695	0	0.144322	0.137	0	0	0	0	0	0.232808	0.383457	0.311603	0.811141	0.621716	0.279191	0.440824	0.377739	0.872572	0.700419
2513020851	140001	150000	0	0	0	0.14105	0	0	0	0	0	0	0	0	0	0	0	0	0	0	0	0	0	0	0	0	0	0	0	0.235595	0.388951	0.307222	0.815139	0.621463	0.279191	0.440824	0.377739	0.872572	0.700419
2513020851	145001	155000	0	0	0	0.148755	0	0	0	0	0	0	0	0.157398	0	0	0.163809	0	0	0	0	0.142439	0	0.141993	0	0	0	0	0.141683	0.235246	0.390352	0.311454	0.821909	0.624773	0.279191	0.440824	0.377739	0.872572	0.700419
2513020851	150001	160000	0	0	0	0	0	0	0	0	0	0	0	0.157398	0	0	0.163809	0	0	0	0	0.142439	0	0.141993	0	0	0	0	0.141683	0.235786	0.389845	0.31404	0.823277	0.627096	0.279191	0.440824	0.377739	0.872572	0.700419
2513020851	155001	165000	0	0	0	0	0	0	0	0	0	0	0	0.157398	0	0	0.163809	0	0	0	0	0.15628	0	0.154686	0	0	0	0	0.141683	0.235506	0.390096	0.316713	0.826447	0.628883	0.279191	0.440824	0.377739	0.872572	0.700419
2513020851	160001	170000	0	0	0	0	0	0	0	0	0	0	0	0	0	0	0	0	0	0	0.134287	0	0	0	0	0	0	0	0	0.23635	0.387556	0.312046	0.816109	0.624315	0.279191	0.440824	0.377739	0.872572	0.700419
2513020851	165001	175000	0	0	0	0	0	0	0	0	0	0	0	0	0	0	0	0	0	0	0.134287	0	0	0.13587	0	0	0	0	0	0.23903	0.383527	0.316964	0.8167	0.624484	0.279191	0.440824	0.377739	0.872572	0.700419
2513020851	170001	180000	0	0	0	0.284943	0.282938	0	0	0.140441	0.136209	0.289229	0.146004	0.148241	0.144876	0	0	0	0	0.143473	0.421495	0.275247	0.142931	0.274502	0	0	0.147967	0	0.130517	0.237302	0.388948	0.325396	0.833368	0.62941	0.279191	0.440824	0.377739	0.872572	0.700419
2513020851	175001	185000	0	0	0	0.284943	0.282938	0	0	0.140441	0.136209	0.289229	0.146004	0.148241	0.144876	0	0	0	0	0.143473	0.281341	0.275247	0.142931	0.274502	0	0	0.147967	0	0.132528	0.236741	0.390639	0.320365	0.834278	0.627657	0.279191	0.440824	0.377739	0.872572	0.700419
2513020851	180001	190000	0	0	0	0.284943	0.282938	0	0	0.140441	0.136209	0.289229	0.146004	0.148241	0.144876	0	0	0	0	0.143473	0.281341	0.275247	0.142931	0.138749	0	0	0.147967	0	0.132528	0.234533	0.392559	0.314169	0.827856	0.626801	0.279191	0.440824	0.377739	0.872572	0.700419
2513020851	185001	195000	0	0	0	0	0	0	0	0	0	0	0	0	0.151306	0	0	0.14067	0.145724	0.150765	0.274456	0.136798	0.143267	0.140844	0	0	0	0	0	0.23616	0.39053	0.327662	0.811708	0.64062	0.279191	0.440824	0.377739	0.872572	0.700419
2513020851	190001	200000	0	0	0	0	0	0	0	0	0	0	0	0	0.151306	0	0	0.14067	0.145724	0.150765	0.274456	0.136798	0.143267	0.140844	0	0	0	0	0	0.236173	0.390695	0.329137	0.81135	0.641948	0.279191	0.440824	0.377739	0.872572	0.700419
2513020851	195001	205000	0.15378	0	0	0	0	0	0	0	0	0	0	0	0.151306	0	0	0.14067	0.145724	0.150765	0.414748	0.278957	0.143267	0.281805	0	0	0	0	0	0.230293	0.384059	0.340149	0.804159	0.642225	0.279191	0.440824	0.380147	0.872572	0.700419
2513020851	200001	210000	0.15378	0	0	0	0	0	0	0	0	0	0	0	0	0	0	0	0	0	0.141378	0.142765	0	0.140961	0	0	0	0	0	0.230422	0.381665	0.314131	0.810617	0.61958	0.279191	0.440824	0.377739	0.872572	0.700419
2513020851	205001	215000	0.15378	0	0	0	0	0	0	0	0	0	0	0	0	0	0	0	0	0	0.141378	0.142765	0	0.140961	0	0	0	0	0	0.231656	0.383163	0.313028	0.811828	0.620415	0.279191	0.440824	0.377739	0.872572	0.700419
2513020851	210001	220000	0	0	0	0	0	0	0	0	0	0	0	0	0	0	0	0	0	0	0	0	0	0	0	0	0	0	0	0.236051	0.388488	0.309227	0.816099	0.623295	0.279191	0.440824	0.377739	0.872572	0.700419
2513020851	215001	225000	0	0	0.146125	0.139425	0	0	0	0	0	0	0	0	0	0	0	0	0	0	0.138877	0	0.145883	0	0.145103	0	0	0.133432	0	0.239227	0.386202	0.311111	0.816	0.615337	0.279191	0.440824	0.377739	0.872572	0.700419
2513020851	220001	230000	0	0	0.146125	0.145103	0	0	0	0	0	0	0	0	0	0	0	0	0	0	0.138877	0	0.145883	0	0.145103	0	0	0.133432	0	0.239574	0.385965	0.311222	0.815934	0.614316	0.279191	0.440824	0.377739	0.872572	0.700419
2513020851	225001	235000	0.289601	1.28518	0.983488	0.278903	1.25724	0.277195	1.26839	1.27766	0.67558	0.139109	0.294515	0.428593	0.286535	0.846653	0.973766	0.556542	0.284429	1.26998	0.663973	1.34763	0.987347	0.799335	0.690392	0.145685	1.33089	0.516848	0.374838	0.21848	0.296168	0.398454	0.737251	0.596538	0.279191	0.440824	0.428974	0.872572	0.700419
2513020851	230001	240000	0.289601	1.28518	0.842819	0.136933	1.25724	0.277195	1.26839	1.27766	0.67558	0.139109	0.294515	0.428593	0.286535	0.846653	0.973766	0.556542	0.284429	1.26998	0.530575	1.34763	0.845768	0.798196	0.551541	0.145685	1.33089	0.387403	0.374838	0.197841	0.220836	0.524179	0.62191	0.607403	0.279191	0.440824	0.545456	0.872572	0.700419
2513020851	235001	245000	0.289601	1.28518	0.842819	0.136933	1.25724	0.277195	1.26839	1.27766	0.67558	0.139109	0.294515	0.428593	0.286535	0.846653	0.973766	0.556542	0.284429	1.26998	0.530575	1.34763	0.845768	0.797072	0.551541	0.145685	1.33089	0.387403	0.374838	0.296695	0.0733638	0.547484	0.20134	0.770069	0.323371	0.440824	0.566957	0.872572	0.800386
2513020851	240001	250000	0	0	0	0	0	0	0	0	0	0	0	0	0	0	0	0	0	0	0	0	0	0	0	0	0	0	0	0.236051	0.388488	0.309227	0.816099	0.623295	0.279191	0.440824	0.377739	0.872572	0.700419
2513020851	245001	255000	0	0	0	0	0	0	0	0	0	0	0	0	0	0	0	0	0	0	0	0	0	0	0	0	0	0	0	0.236051	0.388488	0.309227	0.816099	0.623295	0.279191	0.440824	0.377739	0.872572	0.700419
2513020852	1	10000	8.50204	7.44739	7.27684	7.1826	7.64606	8.28538	8.03273	8.21796	7.03064	8.1211	7.51494	8.2219	7.95717	7.95015	8.65397	7.57974	8.11936	8.17906	8.71377	8.68844	8.48538	8.37518	8.33775	7.62648	7.24433	6.66512	2.66521	0.476029	0.955528	0.77426	2.07455e-06	0.000114449	0.500906	0.957952	0.787157	0.000933189	0.067983
2513020852	5001	15000	17.1344	16.12	16.0524	16.1414	16.4776	15.7513	16.0393	15.6083	15.4268	15.7694	16.6272	15.2085	16.544	16.4147	15.916	14.8865	16.0178	16.3258	16.9018	16.4302	15.7742	15.3349	15.8515	15.0197	15.8894	11.4706	2.98466	0.279582	0.89896	0.0741889	1.42187e-06	0.00141329	0.306405	0.907376	0.377739	0.000933189	0.419748
2513020852	10001	20000	21.0219	20.3741	20.5065	20.4617	20.352	19.6838	20.0147	20.2158	19.7009	19.9304	21.3046	19.762	21.0798	20.8014	20.2062	19.4512	20.3028	20.8342	20.5566	20.0774	19.4688	19.1219	19.92	19.1089	20.2671	15.0394	3.62347	0.303116	0.761577	0.0588561	2.35654e-06	0.000847356	0.329764	0.777307	0.377739	0.000933189	0.335553
2513020852	15001	25000	17.2124	16.2514	16.4691	16.741	16.89	15.8796	16.0567	16.239	15.8044	16.1309	16.8999	15.9119	16.8081	16.6254	16.0454	15.3661	16.2813	16.8488	16.3016	15.6889	15.3927	15.3478	15.6486	15.2497	16.3974	12.1544	3.62295	0.263049	0.759962	0.036687	5.84315e-06	0.00315848	0.289354	0.776996	0.377739	0.00173542	0.583662
2513020852	20001	30000	4.63713	4.4961	4.57664	4.57721	4.68644	4.66015	4.70428	5.0188	4.62654	4.87159	4.93497	5.06696	4.80454	4.71356	4.77149	4.6232	4.78935	4.73939	4.62539	4.82324	4.63278	4.62199	4.51555	4.47672	5.02535	4.00674	1.17963	0.248651	0.978042	0.108661	0.00206126	0.0798445	0.279191	0.978868	0.377739	0.306098	0.700419
2513020852	25001	35000	0	0	0.124024	0	0	0	0	0	0.241128	0.240986	0.245415	0	0.12277	0	0.119067	0	0	0.121942	0.341321	0.575719	0	0.23061	0	0	0	0	0	0.146022	0.291827	0.413347	0.774771	0.816714	0.279191	0.440824	0.439227	0.872572	0.842236
2513020852	30001	40000	0	0	0.124024	0	0	0	0	0	0.241128	0.243084	0.245415	0	0.12277	0	0.119067	0	0	0.121641	0.341374	0.576201	0	0.23061	0	0	0	0	0	0.161533	0.30941	0.842405	0.81673	0.698937	0.279191	0.440824	0.852451	0.872572	0.737089
2513020852	35001	45000	10.7717	10.0123	10.4107	9.49299	9.24873	9.40084	9.79	10.5532	9.31064	10.3721	10.6778	10.2859	10.3698	9.94525	9.79426	9.85068	10.3525	10.0493	9.00384	9.02982	10.0906	9.3424	10.3489	10.1346	10.7056	6.62649	0.423581	0.514583	0.62692	0.0657746	3.95206e-05	0.00554123	0.537192	0.654514	0.377739	0.00939009	0.700419
2513020852	40001	50000	17.4743	16.5685	17.1072	15.0704	16.3453	15.784	16.3375	17.6027	15.6083	16.556	17.098	17.0627	16.8118	16.9383	16.469	16.7566	17.3231	17.2805	15.3188	15.4823	16.7684	15.7817	17.9977	16.8331	19.394	12.6232	3.95141	0.635723	0.512899	0.462709	0.000360996	0.0143984	0.657874	0.53975	0.485171	0.0714771	0.700419
2513020852	45001	55000	17.5967	16.6938	17.6897	15.3029	16.4633	16.3624	16.695	17.8461	15.7232	16.7965	17.2193	17.1854	17.0544	17.0626	16.5917	16.8782	17.4409	17.3973	15.4298	15.5937	16.885	15.8912	18.1191	16.9525	19.6524	12.7381	4.05827	0.660528	0.508447	0.408606	0.000429011	0.0174975	0.680579	0.536016	0.436196	0.0728094	0.700419
2513020852	50001	60000	7.13663	8.62214	9.51908	5.98112	9.45308	8.69847	9.15552	9.34489	8.48538	8.95861	8.886	8.97505	8.72019	9.24731	8.98661	9.06706	9.44762	9.71486	9.4091	8.78491	8.87518	8.65147	10.0556	8.94997	11.4077	8.23148	5.58216	0.460502	0.432858	0.0876215	0.483701	0.0772411	0.485427	0.465009	0.377739	0.872572	0.700419
2513020852	55001	65000	0.395645	5.06197	5.99797	0.546661	5.54321	3.57941	5.88689	5.15568	4.85895	5.68532	5.45135	5.44683	4.85014	5.4273	5.32491	5.68175	5.96698	5.8979	5.98729	5.10375	5.32091	5.11938	5.38562	5.53641	5.54102	5.03836	4.88866	0.255962	0.634241	0.0209217	0.758256	0.101794	0.283094	0.660412	0.377739	0.872572	0.700419
2513020852	60001	70000	0.26314	4.93115	5.35557	0.273776	5.41636	2.93255	5.49137	4.89455	4.7289	5.42642	5.32101	5.31495	4.58641	5.30109	5.20107	5.55824	5.84003	5.77152	5.86755	4.98506	5.19716	4.99747	5.26037	5.40661	5.27653	4.92385	4.7765	0.305391	0.630994	0.0122457	0.740832	0.0827829	0.331328	0.658187	0.377739	0.872572	0.700419
2513020852	65001	75000	0.140757	10.0595	10.1907	1.54823	10.8166	5.69807	11.1122	9.84159	9.63686	11.1079	10.5243	11.187	8.65456	11.1299	10.7568	11.2582	11.4125	11.4264	10.8434	10.6	10.8329	10.4709	10.2955	10.7441	10.5658	10.0051	9.94546	0.377395	0.680371	0.0114126	0.721019	0.0956333	0.401383	0.702892	0.377739	0.872572	0.700419
2513020852	70001	80000	0.140757	7.19496	7.15678	1.54075	7.79574	4.55389	7.94486	7.12501	6.88742	8.09514	7.40679	8.07365	6.1645	8.09716	7.78834	7.93365	8.12247	8.04118	7.98821	7.87318	7.87688	7.62136	7.42819	7.65945	7.80847	7.29236	7.18614	0.365584	0.70913	0.0107604	0.667318	0.0937641	0.390407	0.730059	0.377739	0.872572	0.700419
2513020852	75001	85000	13.6731	21.1169	22.0638	14.1583	22.6035	18.2557	23.5608	22.7253	20.891	24.3145	24.0382	23.7106	19.5989	24.1113	22.6952	23.6315	23.5778	24.8561	23.6954	23.3348	23.4175	22.6881	24.0376	23.1971	24.2375	20.7917	19.1654	0.627112	0.728996	0.00941347	0.884146	0.0484015	0.649529	0.749211	0.377739	0.903929	0.700419
2513020852	80001	90000	13.5385	13.9043	14.8778	12.5693	14.8121	13.5832	15.5905	15.5208	13.9211	16.2131	16.6255	15.5198	13.312	15.9667	14.8817	15.6813	15.4339	16.7908	15.6967	15.5357	15.4997	15.0346	16.631	15.5352	16.4314	13.5253	11.9753	0.137613	0.39641	0.845423	0.287342	0.911671	0.279191	0.440824	0.854776	0.872572	0.920974
2513020852	85001	95000	13.5385	13.9043	14.8778	12.5693	14.8121	13.5832	15.5905	15.5208	13.9211	16.2131	16.6255	15.5198	13.312	15.9667	14.8817	15.6813	15.4339	16.7908	15.6974	15.4129	15.4997	15.0346	16.6177	15.5352	16.4314	13.5253	11.9722	0.18389	0.37386	0.524336	0.612378	0.839593	0.279191	0.440824	0.545456	0.872572	0.861344
2513020852	90001	100000	0.136145	0.132611	0	0.128155	0.128481	0	0	0	0	0.130981	0	0	0	0	0.1295	0	0.131772	0.132185	0.12284	0.124206	0.129526	0.124909	0.131819	0	0	0	0.117161	0.234669	0.383724	0.314857	0.811965	0.615278	0.279191	0.440824	0.377739	0.872572	0.700419
2513020852	95001	105000	0.136145	0.132611	0	0.128155	0.128481	0	0	0	0	0.130981	0	0	0	0	0.1295	0	0.131772	0.270232	0.122281	0.125304	0.128879	0.124909	0.25997	0	0	0	0.117814	0.233484	0.383679	0.315263	0.812401	0.617056	0.279191	0.440824	0.377739	0.872572	0.700419
2513020852	100001	110000	0.136145	0.132611	0	0.128155	0.128481	0	0	0	0	0.130981	0	0	0	0	0.1295	0	0.131772	0.270232	0.122281	0.125304	0.128879	0.124909	0.25997	0	0	0	0.117814	0.233447	0.383609	0.315349	0.812344	0.616965	0.279191	0.440824	0.377739	0.872572	0.700419
2513020852	105001	115000	0	0	0	0	0	0	0	0	0	0	0	0	0	0	0	0	0	0.138826	0	0	0	0	0.129985	0	0	0	0	0.234813	0.38768	0.31047	0.815812	0.623575	0.279191	0.440824	0.377739	0.872572	0.700419
2513020852	110001	120000	1.05036	1.03308	0.776761	1.03814	0.878683	0.886218	0.919171	1.03432	0.878751	1.00818	1.02591	1.01427	1.01023	1.00243	0.974611	0.962922	1.00859	0.989801	0.937672	0.942712	0.970717	0.93618	1.00016	1.04165	1.04586	0.8064	0.779782	0.234885	0.392227	0.309999	0.808281	0.631683	0.279191	0.440824	0.377739	0.872572	0.700419
2513020852	115001	125000	1.05036	1.03308	0.776761	1.03814	0.878683	0.886218	0.919171	1.03432	0.878751	1.00818	1.02591	1.01427	1.01023	1.00243	0.974611	0.962922	1.00859	0.989801	0.936332	0.942712	0.970717	0.93618	1.00016	1.04165	1.04586	0.8064	0.779782	0.234012	0.395097	0.310575	0.802303	0.63801	0.279191	0.440824	0.377739	0.872572	0.700419
2513020852	120001	130000	1.05036	1.03308	0.776761	1.03814	0.878683	0.886218	0.919171	1.03432	0.878751	1.00818	1.02591	1.01427	1.01023	1.00243	0.974611	0.962922	1.00859	0.989801	0.936332	0.942712	0.970717	0.935575	1.00016	1.04165	1.04586	0.8064	0.779685	0.202063	0.831646	0.462041	0.240422	0.776027	0.279191	0.844462	0.484898	0.872572	0.80517
2513020852	125001	135000	0	0	0	0	0	0	0	0	0	0	0	0	0	0	0	0	0	0	0	0	0	0	0	0	0	0	0	NA	NA	NA	NA	NA	NA	NA	NA	NA	NA
2513020853	1	10000	0.919065	0.885259	0.951268	0.607324	0.731261	1.01583	1.05133	0.780737	0.741397	1.69487	1.36252	1.7292	1.37837	1.92394	1.90633	1.75479	1.6916	2.19948	1.46383	1.69408	2.04241	1.80663	1.84546	1.67057	0.840127	1.32872	1.52391	0.268812	0.74108	0.000292301	0.834563	0.00343908	0.295419	0.76097	0.0496077	0.872572	0.583662
2513020853	5001	15000	0	0.142215	0	0	0	0	0	0	0.133917	0	0	0.138423	0	0	0	0	0	0.13238	0.121535	0.127813	0.267507	0.131478	0	0	0	0	0	0.292668	0.454088	0.539496	0.555476	0.707168	0.319862	0.48257	0.560736	0.872572	0.744784
2513020853	10001	20000	0	0	0.124743	0	0	0	0	0	0.133917	0	0	0.138423	0	0	0	0	0	0.13238	0.121877	0	0.265928	0	0	0	0	0	0	0.341951	0.773941	0.568014	0.76299	0.944698	0.367304	0.789247	0.586783	0.872572	0.948691
2513020853	15001	25000	0	0	0.124743	0	0	0	0	0	0.133917	0	0	0.138423	0	0	0	0	0	0	0	0	0.128867	0	0	0	0	0	0	0.827686	0.571947	0.180826	0.994362	0.996736	0.84258	0.59976	0.377739	0.994362	0.996736
2513020853	20001	30000	0.505695	0.871804	1.21662	0.995344	1.08845	0.878275	0.918222	0.890161	0.487479	0	0	0	0	0	0.13122	0	0	0	0	0.123591	0	0	0	0	0	0.456596	0	0.956289	0.0752366	2.14979e-07	0.03134	4.6351e-05	0.960331	0.440824	0.000255395	0.872572	0.055065
2513020853	25001	35000	0.918327	1.38748	1.10209	1.26613	1.09131	1.41671	1.45421	1.27755	0.99606	0.640239	0.926887	0.92045	1.04621	0.510973	0.627728	0.372803	0.905486	0.506495	0.847607	0.718186	0.372356	0.477488	0.639531	0	1.08984	0.913193	0.443735	0.246161	0.699925	1.97735e-05	0.643712	0.510619	0.279191	0.721209	0.0064043	0.872572	0.700419
2513020853	30001	40000	1.65533	2.25342	1.95201	1.76192	1.8426	2.26677	2.6317	1.8052	2.10204	1.2893	1.9852	1.44778	2.49146	0.638197	1.24798	1.11668	1.93471	1.64215	1.80798	1.43289	0.49651	1.30756	1.66309	0	1.62283	0.912989	0.442434	0.225007	0.986737	0.0110105	0.417021	0.391599	0.279191	0.986737	0.377739	0.872572	0.700419
2513020853	35001	45000	1.15254	1.51435	0.854619	0.759679	1.113	1.38849	1.71966	0.910665	1.6103	1.41316	2.11316	1.44778	2.49146	0.637796	1.12252	1.11668	1.93376	1.76761	1.80434	1.43239	0.620637	1.30683	1.66278	0.130761	1.75806	0.799044	0.774024	0.187356	0.260292	0.986223	0.703287	0.0106804	0.279191	0.440824	0.986223	0.872572	0.700419
2513020853	40001	50000	0.763461	0.996203	0.849426	0.49803	1.10141	0.880473	1.18071	0.516025	1.1109	0.77358	1.18427	0.526775	1.45209	0.127056	0.623214	0.743215	1.03104	1.26196	0.963023	0.834548	0.248168	0.830421	1.02306	0.130776	0.675779	0.342382	0.331502	0.411736	0.741934	0.578077	0.744801	0.109991	0.436735	0.761189	0.59666	0.872572	0.700419
2513020853	45001	55000	0.134782	0.122707	0.116499	0.122251	0.482438	0	0.14047	0.137297	0	0.128323	0.1311	0	0	0.127144	0.126741	0	0	0.25655	0.120474	0.238442	0.123442	0	0	0.131401	0.134841	0.463826	0.333123	0.140789	0.152543	0.521666	0.0566344	0.0427122	0.279191	0.440824	0.543631	0.872572	0.700419
2513020853	50001	60000	1.44608	1.29329	1.43506	1.42953	1.40684	1.32024	1.53544	2.45564	1.69877	0.64671	1.18851	0.530309	0.656778	0.643395	0.884455	0.75001	0.518853	0.641194	1.20979	0.838984	0.620987	0.717827	0.641194	0.520825	0.677186	0.34458	0.222288	0.500736	0.0721427	0.00633142	0.0739414	0.241444	0.52458	0.440824	0.377739	0.872572	0.700419
2513020853	55001	65000	1.57773	1.42392	1.43506	1.42953	1.53445	1.32024	1.6747	2.45564	1.69877	0.64671	1.18851	0.530309	0.656778	0.644208	1.01122	0.749341	0.516796	0.640179	1.20972	0.959475	0.621118	0.8378	0.769867	0.520049	0.677186	0.344604	0.334117	0.493718	0.0499774	0.00775366	0.0764575	0.249989	0.518143	0.440824	0.377739	0.872572	0.700419
2513020853	60001	70000	1.44608	1.42392	1.43506	1.29876	1.52679	1.32024	1.52737	2.31664	1.69877	0.64671	1.18851	0.530309	0.656778	0.514716	1.01064	0.749341	0.647103	0.51065	1.20972	0.959475	0.621118	0.837632	0.769577	0.520049	0.677186	0.229519	0.334117	0.321985	0.0614118	0.0061637	0.0543551	0.364848	0.346798	0.440824	0.377739	0.872572	0.700419
2513020853	65001	75000	0.133257	0.13046	0.119668	0	0.371838	0	0.138176	0	0	0	0	0	0	0	0.259534	0	0.262499	0	0.246075	0.370673	0.1271	0.246107	0.134008	0	0	0.119067	0.229994	0.903452	0.0615676	0.433105	0.880136	0.441677	0.913448	0.440824	0.456952	0.900605	0.700419
2513020853	70001	80000	0	0	0.120648	0	0.366398	0	0	0	0.123459	0	0	0	0	0.129593	0.128408	0	0.39384	0	0.369112	0.368216	0.254487	0.243538	0.130206	0	0	0.120734	0.229612	0.881053	0.118311	0.0832993	0.611404	0.743148	0.89156	0.440824	0.377739	0.872572	0.778536
2513020853	75001	85000	0	0.13036	0	0	0.2459	0	0	0.126392	0.123459	0.25948	0.131647	0	0.130996	0.383895	0	0.12632	0.26256	0.12779	0.61231	0.481055	0.508398	0.480255	0.384716	0	0.269565	0.235566	0.344417	0.777057	0.250355	0.00311504	0.358082	0.144663	0.797188	0.440824	0.336425	0.872572	0.700419
2513020853	80001	90000	0.905761	1.68575	0.582338	0.831579	0.835645	0.892357	1.17751	0.893556	1.21906	1.34008	1.50725	0.962708	1.22264	1.31085	0.927117	0.895838	0.931108	0.784831	1.60315	1.34322	1.02457	1.22289	1.18344	0.985706	2.18985	0.864441	1.05694	0.347648	0.653609	0.559697	0.570279	0.763592	0.372748	0.677034	0.578695	0.872572	0.796442
2513020853	85001	95000	0.905761	1.68575	0.58227	0.831579	0.715604	0.892357	1.17751	0.893556	1.09689	1.34008	1.50725	0.962708	1.22264	1.1799	0.927117	0.895838	0.799543	0.784831	1.47983	1.22192	0.898093	1.10507	1.05735	0.985706	2.18985	0.869688	0.941576	0.358598	0.503927	0.862372	0.365853	0.87175	0.384143	0.531724	0.869693	0.872572	0.887437
2513020853	90001	100000	0.905761	1.5521	0.58227	0.831579	0.715604	0.892357	1.17751	0.766251	1.09689	1.0734	1.38176	0.963366	1.08831	0.918327	0.927117	0.768286	0.798402	0.65498	1.11083	0.979152	0.64465	0.860872	0.795166	0.985706	1.91769	0.750912	0.82498	0.376144	0.319518	0.369819	0.148339	0.970233	0.400411	0.440824	0.401228	0.872572	0.973511
2513020854	1	10000	0.507007	0.4939	0.601794	0.484347	0.862553	0.627146	0.525605	0.517473	0.6386	0.510788	0.523689	0.785533	0.520159	1.15946	1.00297	0.622001	1.18566	1.01902	0.851088	0.759679	0.922731	0.75547	1.06169	0.644587	1.08317	0.23892	0.455618	0.127084	0.416229	0.927417	0.370938	0.977239	0.279191	0.452888	0.931336	0.872572	0.979713
2513020854	5001	15000	3.28617	3.31982	3.21078	2.96759	3.62532	3.51897	3.31861	3.48042	3.44226	3.28087	3.36094	3.37444	3.36236	3.52743	3.62563	3.65607	3.56337	3.65486	3.60632	3.47049	3.63461	3.45339	3.48043	3.53174	3.43243	3.00786	3.15265	0.216706	0.367594	0.398552	0.706394	0.771323	0.279191	0.440824	0.428974	0.872572	0.800989
2513020854	10001	20000	3.42202	3.31982	3.21078	3.10559	3.75061	3.51897	3.31861	3.48042	3.44226	3.28087	3.36094	3.37444	3.36236	3.52743	3.7578	3.65607	3.69535	3.7854	3.73201	3.59245	3.76442	3.57815	3.48043	3.53174	3.43243	3.12966	3.15227	0.204567	0.354154	0.405447	0.703418	0.730018	0.279191	0.440824	0.433938	0.872572	0.766132
2513020854	15001	25000	3.03803	2.93809	2.72909	2.62134	3.12904	2.99862	2.93785	2.94859	2.80807	2.75911	2.82921	2.70632	2.83495	3.02118	3.24689	3.13515	3.18506	3.26831	3.11494	3.24237	3.25031	3.09145	3.11669	3.03803	2.88714	2.8903	2.80888	0.200677	0.321941	0.429613	0.714834	0.660157	0.279191	0.440824	0.45409	0.872572	0.705275
2513020854	20001	30000	0.401478	0.1344	0.132661	0.129368	0.26008	0.139829	0.145027	0	0	0	0	0	0	0.139829	0.271698	0.136665	0.279713	0.273911	0.261727	0.388183	0.271782	0.258528	0.139478	0.137957	0	0.1244	0.121612	0.14663	0.284755	0.439243	0.626543	0.501691	0.279191	0.440824	0.462607	0.872572	0.700419
2513020854	25001	35000	0.409143	0.1344	0.26132	0	0.131678	0.139829	0.145027	0	0	0	0	0	0	0.276597	0.136978	0.136665	0.14153	0.136446	0.260919	0.383091	0.137577	0.127133	0.139478	0.137957	0	0	0.121612	0.0684315	0.233017	0.455037	0.388165	0.391873	0.279191	0.440824	0.478393	0.872572	0.700419
2513020854	30001	40000	0.26798	0	0.128905	0	0	0	0	0	0	0	0	0	0	0.136933	0	0	0	0	0.129277	0.127244	0	0	0	0	0	0	0	0.00266845	0.322611	0.41798	0.041356	0.173468	0.279191	0.440824	0.443754	0.872572	0.700419
2513020854	35001	45000	0.136381	0	0.128905	0	0	0	0	0	0	0	0	0	0	0.136933	0	0	0	0	0.129277	0.127244	0	0	0	0	0	0	0	0.00746885	0.512421	0.858262	0.0833659	0.668211	0.279191	0.539726	0.866283	0.872572	0.711321
2513020855	1	10000	5.68766	5.49803	5.03292	5.43085	6.11894	5.64312	6.1163	5.41205	5.19579	5.2188	5.3137	5.17498	5.53204	5.57436	5.34188	5.66766	5.82166	5.51642	4.93218	4.9442	5.77087	5.29077	5.21435	4.93933	5.81221	4.87375	4.0896	0.253377	0.421895	0.161505	0.380647	0.855875	0.281846	0.456124	0.377739	0.872572	0.874274
2513020855	5001	15000	2.65424	2.75127	2.59211	2.40444	3.56785	2.70928	3.32556	2.51723	2.4321	2.56262	2.10592	2.59194	2.58013	2.65773	2.60845	2.71041	3.03057	2.75098	2.18006	2.07045	3.17673	2.76212	2.6666	2.33984	2.71509	2.3265	2.25695	0.36576	0.394324	0.205432	0.56129	0.686142	0.390407	0.440824	0.377739	0.872572	0.727151
2513020855	10001	20000	0	0.125962	0	0.122895	0.252025	0.123459	0.12502	0	0	0.12295	0	0.125285	0	0.124427	0.121347	0.121107	0.125712	0.245446	0.115088	0.117682	0.241652	0.122856	0.125362	0.126033	0	0.111819	0.107474	0.1998	0.375157	0.404993	0.778745	0.617528	0.279191	0.440824	0.433843	0.872572	0.700419
2513020855	15001	25000	0	0	0	0	0	0	0	0	0	0	0	0	0	0	0	0	0	0	0	0	0	0	0	0	0	0	0	0.236051	0.388488	0.309227	0.816099	0.623295	0.279191	0.440824	0.377739	0.872572	0.700419
2513020856	1	10000	2.48388	2.52964	2.0839	2.13999	2.50191	1.62467	1.63371	1.8897	1.9946	2.4085	2.16375	1.98636	2.31505	2.52458	2.07537	2.2128	2.18409	2.6483	2.26545	2.22911	2.24074	2.5184	2.27459	2.34857	2.25405	1.59784	2.01207	0.92053	0.325731	0.0776587	0.454767	0.385043	0.929923	0.440824	0.377739	0.872572	0.700419
2513020856	5001	15000	2.32322	2.42534	1.93817	1.98714	2.36032	1.48103	1.50501	1.73479	1.85213	2.25176	2.06377	1.84612	2.15882	2.37758	1.95178	2.08257	2.07602	2.51698	2.13755	2.09703	2.11906	2.38654	2.16468	2.22136	2.10814	1.49434	1.9158	0.947919	0.347211	0.055997	0.45579	0.42566	0.953538	0.440824	0.377739	0.872572	0.700419
2513020856	10001	20000	0.892529	1.05518	0.692362	0.750173	0.786599	0.715155	0.70393	0.428098	1.05355	0.725323	0.730421	0.714321	0.738264	0.871075	0.684104	0.683992	0.649514	0.89404	0.682013	0.658158	0.692612	0.904121	0.715997	0.848813	0.457501	0.768571	0.75392	0.509404	0.652761	0.835646	0.729674	0.874471	0.532254	0.677034	0.846332	0.872572	0.889272
2513020856	15001	25000	0	0	0	0	0	0	0	0	0	0	0	0	0	0	0	0	0	0	0	0	0	0	0	0	0	0	0	NA	NA	NA	NA	NA	NA	NA	NA	NA	NA
2513020857	1	10000	0	0	0	0	0	0	0	0	0	0	0	0	0	0	0	0	0	0	0	0	0	0	0	0	0	0	0	NA	NA	NA	NA	NA	NA	NA	NA	NA	NA
2513020857	5001	15000	0	0	0	0	0	0	0	0	0	0	0	0	0	0	0	0	0	0	0	0	0	0	0	0	0	0	0	NA	NA	NA	NA	NA	NA	NA	NA	NA	NA
2513020857	10001	20000	0	0	0	0	0	0	0	0	0	0	0	0	0	0	0	0	0	0	0	0	0	0	0	0	0	0	0	NA	NA	NA	NA	NA	NA	NA	NA	NA	NA
2513020858	1	10000	0	0	0.119566	0.247755	0	0	0	0	0	0	0.122816	0	0	0	0	0	0	0.126361	0	0.113962	0	0	0.120378	0	0	1.53562	0	0.199984	0.368992	0.482531	0.957143	0.428943	0.279191	0.440824	0.504619	0.961188	0.700419
2513020858	5001	15000	0	0	0	0	0	0	0	0	0	0	0	0	0	0	0	0	0	0.140272	0	0	0	0	0	0	0	1.53401	0	0.207553	0.381199	0.497981	0.953669	0.465168	0.279191	0.440824	0.519861	0.959321	0.700419
2513020859	1	10000	0.537222	3.1887	2.74394	0.638774	4.09392	3.14905	4.12092	2.96803	3.17622	6.29258	5.42581	4.53296	3.78664	4.90048	6.14553	5.29404	5.9312	6.25666	6.63424	5.13149	5.75613	5.85037	6.61624	4.39189	4.07723	4.51136	5.07723	0.59145	0.926948	5.38747e-05	0.744137	0.00817062	0.614736	0.931661	0.0117406	0.872572	0.700419
2513020859	5001	15000	0.537222	3.1887	2.74394	0.638774	4.09392	3.14905	4.12092	2.96803	3.17622	6.29258	5.42581	4.53296	3.78664	4.90048	6.14435	5.29404	5.80218	6.25666	6.63424	5.13149	5.75266	5.8246	6.61624	4.39189	4.07723	4.39569	5.07723	0.596971	0.928587	5.92962e-05	0.743116	0.00796415	0.61939	0.932518	0.0117406	0.872572	0.700419
2513020859	10001	20000	0	0	0	0	0	0	0	0	0	0	0	0	0	0	0	0	0	0	0	0	0	0	0	0	0	0	0	NA	NA	NA	NA	NA	NA	NA	NA	NA	NA
2513020860	1	10000	0.126289	0.123053	0	0.122037	0.364436	0.243595	0.126145	0	0	0	0.26683	0.124561	0	0	0.11925	0.23578	0.366844	0	0.114156	0	0.24235	0.116104	0	0.252392	0	0.234331	0.395128	0.409316	0.859423	0.813191	0.457354	0.361946	0.434556	0.869689	0.824996	0.872572	0.700419
2513020860	5001	15000	0.126237	0.123053	0	0.122037	0.360754	0.243595	0.126145	0	0	0	0.281111	0.124561	0	0	0.11925	0.23578	0.366844	0	0.114149	0	0.239528	0.11508	0	0.249231	0	0.238054	0.395128	0.412939	0.841963	0.885499	0.537635	0.321892	0.437619	0.853477	0.892259	0.872572	0.700419
2513020861	1	10000	1.65753	1.51283	0.67956	1.50211	1.47109	2.16281	2.81398	0.408626	1.295	1.04574	1.20575	0.935395	0.662062	1.0543	1.67975	0.766877	1.59153	1.56433	2.83541	2.46818	1.29122	2.58681	1.17581	0.271325	0.822411	1.07377	1.03826	0.729485	0.117378	0.902101	0.129281	0.941185	0.749031	0.440824	0.907448	0.872572	0.945963
2513020861	5001	15000	0.415342	0.277652	0.140188	0.967403	0.939876	0.815095	1.83519	0	0.269759	0.130703	0	0	0	0.395551	0.388302	0.257408	1.06155	0.651591	1.59959	1.37067	0.387481	1.48369	0.131205	0	0	0	0	0.574678	0.157241	0.915452	0.0347776	0.906481	0.59835	0.440824	0.920099	0.872572	0.91651
2513020862	1	10000	4.04405	3.94571	3.37818	3.67247	4.24192	3.83754	3.71637	3.78415	3.65612	3.73824	3.57469	3.81867	3.54252	3.90493	3.78959	4.27456	4.41484	4.1352	3.77086	3.54014	4.43407	3.51785	3.33893	3.83242	2.72546	3.51353	3.05621	0.70751	0.585557	0.42814	0.494042	0.417396	0.727095	0.612948	0.453325	0.872572	0.700419
2513020862	5001	15000	0.445278	0.435999	0.422445	0.595209	0.428197	0.4297	0.444173	0.582423	0.411823	0.433955	0.581487	0.435883	0.580259	0.569113	0.419079	0.28821	0.301852	0.426835	0.534583	0.536255	0.292169	0.400245	0.42514	0.443901	0.461529	0.3845	0.371353	0.595365	0.913461	0.325304	0.761719	0.245356	0.618263	0.918885	0.377739	0.872572	0.700419
2513020863	1	10000	0	0	0.120846	0	0.120352	0.12277	0	0	0	0	0	0	0	0.125049	0	0.121726	0.125912	0.123533	0.117478	0.118463	0.122125	0.118599	0.125952	0.126424	0	0.112299	0.109381	0.489962	0.582493	0.0548461	0.913005	0.888511	0.515111	0.610279	0.377739	0.927051	0.90064
2513020863	5001	15000	0	0	0	0	0	0	0	0	0	0	0	0	0	0	0	0	0	0	0	0	0	0	0	0	0	0	0	NA	NA	NA	NA	NA	NA	NA	NA	NA	NA
2513020864	1	10000	0	0	0	0	0	0	0	0	0	0	0	0	0	0	0	0	0	0	0	0.284429	0	0	0	0	0	0	0	0.185016	0.757533	0.42798	0.762638	0.875049	0.279191	0.77518	0.453325	0.872572	0.889272
2513020864	5001	15000	0	0	0	0	0	0	0	0	0	0	0	0	0	0	0	0	0	0	0	0	0	0	0	0	0	0	0	NA	NA	NA	NA	NA	NA	NA	NA	NA	NA
2513020865	1	10000	0	0.113676	0.229396	0.232506	0.229596	0.116165	0.236362	0.362181	0.345193	0.226056	0.115354	0.114116	0.231639	0.109998	0.109169	0.110619	0.109867	0.110137	0.106069	0.105584	0.109214	0.105976	0.236393	0	0.625666	0	0	0.641773	0.531354	0.263354	0.841451	0.667794	0.663556	0.558675	0.377739	0.872572	0.711321
2513020866	1	10000	0	0	0	0.136798	0	0	0	0	0	0	0	0	0	0	0	0	0	0	0.362917	0	0	0	0	0	0	0	0	0.930822	0.855932	0.697986	0.744106	0.985685	0.93928	0.866896	0.711766	0.872572	0.986515
2513020867	1	10000	0.127502	0.124481	0.123492	0.122577	0.122379	0	0	0.126023	0.121093	0	0	0	0	0	0	0	0	0	0	0	0	0	0	0	0	0	0	0.502121	0.164287	2.15633e-05	0.0687983	0.00297678	0.525568	0.440824	0.0064043	0.872572	0.583662
2513020868	1	10000	0	2.64079	3.89341	0	0.124725	0.122538	0	0.12779	0	0.249468	0	2.45725	4.89264	0	0	0	0	0.124418	0	0	0.123895	0.117844	0	0.121291	1.61531	1.57687	0.226553	0.660258	0.645956	0.210658	0.29425	0.93219	0.680579	0.670844	0.377739	0.872572	0.93851
2513020868	5001	15000	0	0	0.368779	0	0	0	0	0	0	0	0	0	0.257259	0	0	0	0	0	0	0	0	0	0	0	0	0	0	0.259955	0.450549	0.272593	0.816837	0.67813	0.286481	0.480532	0.377739	0.872572	0.719945
2513020868	10001	20000	0	0	0.119279	0	0	0	0	0	0	0	0	0	0.127594	0	0	0	0	0	0	0	0	0	0	0	0	0	0	0.255192	0.438265	0.301303	0.82102	0.694102	0.282675	0.469966	0.377739	0.872572	0.734932
2513020869	1	10000	1.42569	4.8048	5.05217	0.83204	6.20871	1.92839	6.76216	5.85075	3.80023	6.09809	4.38664	4.39045	3.16848	5.83231	5.41992	5.26661	6.92602	6.33889	5.74908	5.68412	5.92501	6.21684	6.22806	6.21422	6.43871	5.93704	6.41414	0.375133	0.761479	0.00076229	0.646705	0.741469	0.399693	0.777307	0.100622	0.872572	0.777462
2513020869	5001	15000	1.28312	1.35397	0.963201	0.853287	1.22569	1.2328	1.41652	1.11455	0.933167	1.30346	1.07888	1.32611	1.22059	1.30095	1.3122	1.42552	2.08124	1.29342	1.35324	1.49593	1.27859	1.36772	1.21028	0.949492	1.41591	1.20101	1.26934	0.311675	0.397529	0.00394876	0.666132	0.482641	0.337222	0.440824	0.377739	0.872572	0.700419
2513020870	1	10000	1.34192	1.15875	1.25725	1.46252	1.51072	1.42424	1.2017	1.55329	1.5869	1.51794	1.66123	0.804952	1.68133	1.39372	1.4838	1.29085	1.16554	1.62484	1.56575	1.44165	1.68037	1.6977	1.87373	1.63159	1.69296	0.772106	0.536268	0.977295	0.437913	0.594078	0.0568053	0.0856916	0.979769	0.469966	0.612112	0.872572	0.700419
2513020871	1	10000	1.11172	1.19554	1.04692	1.18197	1.04003	1.06264	1.08767	0.732266	1.0498	0.605875	0.74225	0.740307	0.85977	0.846665	0.591966	0.820632	0.852432	0.6037	1.59875	0.577013	0.711691	0.574223	0.841056	0.742553	0.762663	0.885053	0.859164	0.416224	0.893498	0.02555	0.917627	0.421395	0.440708	0.902635	0.377739	0.929361	0.700419
2513020871	5001	15000	0	0.125133	0	0	0	0	0	0	0.123053	0	0	0	0	0	0	0	0	0	0.912295	0	0.122015	0	0	0	0	0	0	0.667591	0.722075	0.595691	0.764059	0.917479	0.68726	0.742741	0.612711	0.872572	0.926054
2513020872	1	10000	1.2632	1.24706	1.1231	1.39286	1.22824	1.3566	1.41698	1.2721	0.968262	0.494699	0.62147	0.746082	0.883803	1.10423	0.840143	0.962922	0.492855	0.849523	1.2605	1.26484	0.602691	0.923188	0.990274	0.129421	1.02903	0.566281	0.549421	0.989591	0.306945	0.0594926	0.0326353	0.855161	0.990424	0.440824	0.377739	0.872572	0.874274
2513020872	5001	15000	0	0.120333	0.118747	0.122485	0.119431	0.122492	0.124189	0.13029	0.118648	0	0	0	0	0.246011	0.121121	0.11873	0	0.121114	0.2302	0.115321	0.12048	0	0.12502	0	0	0	0	0.131528	0.0343142	0.597873	0.00332435	0.266271	0.279191	0.440824	0.614423	0.438814	0.700419
2513020873	1	10000	1.18593	1.5605	0.719105	0.560863	1.7535	1.44249	1.63578	0.874107	1.12793	1.15255	1.18301	1.16516	1.15751	1.12887	1.11246	1.59322	1.76814	1.75398	1.64078	1.62379	1.71758	1.65036	1.77669	1.54044	0.772112	1.0261	1.52401	0.56839	0.893502	0.0116387	0.773226	0.791051	0.592322	0.902635	0.377739	0.872572	0.817901
2513020873	5001	15000	0.743065	1.5605	0.719105	0.560863	1.53112	1.23279	1.58789	0.430315	0.709498	0.719812	0.741897	0.732677	0.723817	0.705101	0.692737	1.48516	1.53374	1.54879	1.29502	1.27936	1.46861	1.42802	1.5531	1.54044	0.772112	0.638774	1.2891	0.422603	0.945399	0.0173079	0.723912	0.862637	0.447064	0.948598	0.377739	0.872572	0.879668
2513020874	1	10000	0	0	0	0	0	0	0	0	0	0	0	0	0	0	0	0	0	0	0	0	0	0	0	0	0	0	0	0.236051	0.388488	0.547868	0.715942	0.790237	0.279191	0.440824	0.566957	0.872572	0.817771
2513020874	5001	15000	0	0	0	0	0	0	0	0	0	0	0	0	0	0	0	0	0	0	0	0	0	0	0	0	0	0	0	NA	NA	NA	NA	NA	NA	NA	NA	NA	NA
2513020874	10001	20000	0	0	0	0	0	0.143542	0	0	0	0	0	0	0	0	0	0.146661	0	0	0.14153	0	0	0.146999	0	0	0	0	0	0.254585	0.912839	0.605188	0.839859	0.835276	0.282396	0.918885	0.619262	0.872572	0.858528
2513020874	15001	25000	0	0	0	0	0	0.143542	0	0	0	0	0	0	0	0	0	0.146661	0	0	0.14153	0	0	0.146999	0	0	0	0	0	0.25437	0.912416	0.605173	0.839823	0.835403	0.282396	0.918885	0.619262	0.872572	0.858528
2513020874	20001	30000	0	0	0	0	0	0.143542	0	0	0	0	0	0	0	0	0	0.146661	0	0	0.14153	0	0	0.146999	0	0	0	0	0	0.25437	0.912416	0.605173	0.839823	0.835403	0.282396	0.918885	0.619262	0.872572	0.858528
2513020874	25001	35000	0	0	0	0	0	0	0	0	0	0	0	0	0	0	0	0	0	0	0	0	0	0	0	0	0	0	0	NA	NA	NA	NA	NA	NA	NA	NA	NA	NA
2513020874	30001	40000	0	0	0	0	0	0	0	0	0	0	0	0	0	0	0	0	0	0	0	0	0	0	0	0	0	0	0	NA	NA	NA	NA	NA	NA	NA	NA	NA	NA
2513020875	1	10000	0	0	0	0	0.128048	0.125653	0	0	0	0	0	0	0	0	0	0.124688	0.131945	0	0	0	0	0	0	0.137091	0	0.270915	0.225514	0.436009	0.641483	0.0961312	0.0319451	0.105991	0.460425	0.667368	0.377739	0.872572	0.700419
2513020875	5001	15000	0	0	0	0	0.131601	0	0	0	0	0	0	0	0	0	0	0.124688	0.127836	0	0	0	0	0	0	0.137091	0	0.1337	0.113084	0.643662	0.25828	0.0719852	0.410242	0.564665	0.664931	0.440824	0.377739	0.872572	0.700419
2513020875	10001	20000	0	0	0	0	0.131601	0	0	0	0	0	0	0	0	0	0	0	0	0	0	0	0	0	0	0.137091	0	0.1337	0	0.559982	0.335225	0.59549	0.280972	0.361823	0.584073	0.440824	0.612711	0.872572	0.700419
2513020875	15001	25000	0	0	0	0	0.131601	0	0	0	0	0	0	0	0	0	0	0	0	0	0	0	0	0	0	0	0	0	0	0.780073	NA	0.625111	0.925726	0.812661	0.798931	NA	0.639098	0.935099	0.838785
2513020875	20001	30000	0	0	0	0	0	0	0	0	0	0	0	0	0	0	0	0	0	0	0	0	0	0	0	0	0	0	0	NA	NA	NA	NA	NA	NA	NA	NA	NA	NA
2513020876	1	10000	0	0	0	0	0	0	0	0	0	0	0	0	0	0	0	0	0	0	0	0	0	0	0	0	0	0	0	NA	NA	NA	NA	NA	NA	NA	NA	NA	NA
2513020876	5001	15000	0	0	0	0	0	0	0	0	0	0	0	0	0	0	0	0	0	0	0	0	0	0	0	0	0	0	0	NA	NA	NA	NA	NA	NA	NA	NA	NA	NA
2513020876	10001	20000	0	0	0	0	0	0	0	0	0	0	0	0	0	0	0	0	0	0	0	0	0	0	0	0	0	0	0	NA	NA	NA	NA	NA	NA	NA	NA	NA	NA
2513020877	1	10000	6.52818	3.77003	4.68749	1.9801	4.39078	4.83504	4.61755	4.2864	5.24835	4.57582	6.12921	5.0117	6.70204	3.80221	5.25567	4.90646	3.72662	5.08655	3.95507	5.41833	2.10521	4.40682	4.80255	1.34346	6.58831	2.83782	1.80941	0.785028	0.316231	0.774568	0.947654	0.0882319	0.803285	0.440824	0.787157	0.954079	0.700419
2513020877	5001	15000	3.96765	3.52799	2.85273	3.76758	3.23022	2.90077	2.38967	3.5739	3.19532	2.80956	2.84568	3.21337	2.95213	2.65255	2.61378	1.77727	2.19509	2.76636	3.07456	3.09	1.78413	2.18116	2.43682	1.13311	2.84096	2.09903	1.93821	0.829197	0.967662	0.0254252	0.692029	0.979465	0.843395	0.969297	0.377739	0.872572	0.981116
2513020877	10001	20000	2.48908	2.08108	1.89378	1.80807	2.01711	1.95318	1.8728	2.08722	2.0253	1.48572	1.89064	1.63516	1.6297	1.71447	1.56524	1.31928	1.48279	1.46252	1.84868	1.96599	1.56475	1.62466	1.59825	1.14261	1.82864	1.5658	1.4255	0.953031	0.291885	0.0169076	0.550424	0.564865	0.957869	0.440824	0.377739	0.872572	0.700419
2513020877	15001	25000	2.35596	2.08108	1.89378	1.8051	2.01711	1.95212	1.8728	2.08722	2.02336	1.48572	1.89064	1.63516	1.6297	1.71447	1.56524	1.31928	1.48042	1.46252	1.84868	1.96599	1.56475	1.62207	1.59825	1.14261	1.82864	1.5658	1.4255	0.862368	0.283332	0.0171739	0.553195	0.592518	0.874141	0.440824	0.377739	0.872572	0.700419
2513020878	1	10000	0.517525	0.513099	0.513244	0.921638	0.756317	0.635059	0.679037	0.669676	0.632118	0.617872	0.635059	0.642776	0.637853	0.61416	0.611182	0.611108	0.739671	0.856863	0.820026	0.578759	0.717434	0.687343	0.622179	0.486562	0.657772	0.661535	0.647593	0.839508	0.643784	0.0785784	0.27448	0.785042	0.852423	0.669174	0.377739	0.872572	0.813813
2513020878	5001	15000	0	0	0	0	0	0	0	0	0	0	0	0	0	0	0	0	0.118061	0.116867	0.112621	0	0	0.110221	0	0	0	0	0	0.164328	0.262801	0.972649	0.48786	0.554189	0.279191	0.440824	0.974289	0.872572	0.700419
2513020878	10001	20000	0	0	0	0	0	0	0	0	0	0	0	0	0	0	0	0	0.118061	0.116867	0.112621	0	0	0.110221	0	0	0	0	0	0.50729	0.386425	0.00462915	0.0329859	0.0804114	0.530511	0.440824	0.377739	0.872572	0.700419

## Sheet: ThetaPi
			Transfer 12													Transfer 20														Uncorrected p-values					FDR corrected p-values (q-values)
			Coevolution replicate population									One-sided adaptation populations				Coevolution replicate population										One-sided adaptation populations				Linear Regression Analysis		ANOVA AlleleFrequency~Generation+Treatment[Replicate]+Generation*Treatment[Replicate]			Linear Regression Analysis		ANOVA AlleleFrequency~Generation+Treatment[Replicate]+Generation*Treatment[Replicate]
Chromosome	StartWindow	EndWindow	1	2	4	5	6	7	8	9	10	2	3	4	6	1	2	3	4	5	6	7	8	9	10	3	4	6	9	Killing Ability	Infection Load	Transfer	Treatment	Treatment*Transfer	Killing Ability	Infection Load	Transfer	Treatment	Treatment*Transfer
2513020848	1	10000	0	0	0	0.344902	0.219388	0.348045	0	0	0	0	0.208257	0.204954	0.192186	0	0.293229	0	0	0	0.318161	0	0	0.421741	0.121583	0	0	0	0	0.23937	0.388599	0.307001	0.814948	0.630626	0.275824	0.436639	0.366431	0.871894	0.689941
2513020848	5001	15000	0	0	0	0.344902	0	0.105847	0	0	0	0	0.208257	0	0.192186	0	0.116327	0	0	0	0.122858	0	0	0.245429	0.121583	0	0	0	0	0.238063	0.38776	0.306681	0.816851	0.627167	0.275824	0.436639	0.366431	0.871894	0.689941
2513020848	10001	20000	0	0	0	0.212974	0	0	0	0	0	0	0.208257	0	0.192186	0	0.116327	0	0	0	0.122858	0	0	0.245429	0.121583	0	0	0	0	0.237838	0.387948	0.308386	0.817175	0.627656	0.275824	0.436639	0.366431	0.871894	0.689941
2513020848	15001	25000	0	0	0	0	0	0	0	0	0	0	0	0	0	0	0	0	0	0	0	0	0	0	0	0	0	0	0	0.236051	0.388488	0.309227	0.816099	0.623295	0.275824	0.436639	0.366431	0.871894	0.689941
2513020848	20001	30000	0	0	0	0	0	0	0	0	0	0	0	0	0	0	0	0	0	0	0	0	0	0	0	0	0	0	0	0.236051	0.388488	0.309227	0.816099	0.623295	0.275824	0.436639	0.366431	0.871894	0.689941
2513020848	25001	35000	0.254157	0.341968	0	0.472773	0.356046	0.321368	0.454863	0.28465	0.287114	0.571464	0.394568	0.35073	0.381352	0.338785	0.310293	0.305335	0.307699	0.396961	0.527865	0.269682	0.361183	0.353025	0.352818	0.377483	0.539777	0.353713	0.39211	0.23709	0.390134	0.310379	0.818762	0.624892	0.275824	0.436639	0.366431	0.871894	0.689941
2513020848	30001	40000	0.254157	0.341968	0	0.472773	0.356046	0.321368	0.454863	0.28465	0.287114	0.571464	0.394568	0.548319	0.381352	0.338785	0.310293	0.305335	0.307699	0.396961	0.684989	0.492799	0.361183	0.353025	0.352818	0.377483	0.539777	0.353713	0.538433	0.23653	0.391347	0.310562	0.820865	0.625409	0.275824	0.436639	0.366431	0.871894	0.689941
2513020848	35001	45000	0.254157	0.341968	0	0.472773	0.356046	0.321368	0.454863	0.28465	0.287114	0.571464	0.394568	0.548319	0.381352	0.338785	0.310293	0.305335	0.307699	0.396961	0.684989	0.492799	0.361183	0.353025	0.352818	0.377483	0.539777	0.353713	0.538433	0.236595	0.391732	0.310742	0.821502	0.625693	0.275824	0.436639	0.366431	0.871894	0.689941
2513020848	40001	50000	0	0.348213	0.119132	0	0.342834	0	0	0	0	0	0	0.197589	0	0	0	0	0	0	0.281	0.223117	0	0.388797	0.371117	0	0	0	0.146323	0.238478	0.387761	0.307877	0.818009	0.619629	0.275824	0.436639	0.366431	0.871894	0.689941
2513020848	45001	55000	0	0.348213	0.119132	0	0.342834	0	0	0	0	0	0	0	0	0	0	0	0	0	0.123877	0	0	0.388797	0.371117	0	0	0.122602	0	0.241488	0.384101	0.307012	0.815688	0.614163	0.275824	0.436639	0.366431	0.871894	0.689941
2513020848	50001	60000	0	0.348213	0.119132	0	0.342834	0	0	0	0	0	0	0	0	0	0	0	0	0	0.123877	0	0	0.388797	0.371117	0	0	0.122602	0	0.246498	0.380224	0.305087	0.815033	0.606	0.277047	0.436639	0.366431	0.871894	0.689941
2513020848	55001	65000	0	0	0	0	0	0	0	0	0	0	0	0	0	0	0	0	0	0	0	0	0	0	0	0	0	0.122602	0	0.236051	0.388488	0.31233	0.822867	0.618294	0.275824	0.436639	0.366431	0.871894	0.689941
2513020848	60001	70000	0	0	0	0.202819	0	0.17975	0	0	0	0	0	0	0	0	0	0	0	0	0	0	0	0	0	0	0	0	0.198726	0.238779	0.385503	0.304822	0.828907	0.60698	0.275824	0.436639	0.366431	0.871894	0.689941
2513020848	65001	75000	0	0	0	0.202819	0	0.17975	0	0	0	0	0	0	0	0	0	0	0	0	0.306242	0.137099	0	0.158474	0.144986	0	0	0	0.294253	0.239681	0.380956	0.315376	0.829304	0.612587	0.275824	0.436639	0.366431	0.871894	0.689941
2513020848	70001	80000	0	0	0	0.202819	0	0.17975	0	0	0	0	0	0	0	0	0	0	0	0	0.306242	0.137099	0	0.158474	0.144986	0	0	0	0.294253	0.239314	0.381696	0.314757	0.828017	0.613645	0.275824	0.436639	0.366431	0.871894	0.689941
2513020848	75001	85000	0	0	0	0	0	0	0	0	0	0	0	0	0	0	0	0	0	0	0.306242	0.137099	0	0.158474	0.144986	0	0	0	0.095527	0.237312	0.384774	0.315023	0.81955	0.622851	0.275824	0.436639	0.366431	0.871894	0.689941
2513020848	80001	90000	0	0	0	0	0	0	0	0	0	0	0	0	0	0	0	0	0	0	0	0	0	0	0	0	0	0	0	0.236051	0.388488	0.309227	0.816099	0.623295	0.275824	0.436639	0.366431	0.871894	0.689941
2513020848	85001	95000	0	0	0.143676	0	0	0	0	0	0	0	0	0	0	0	0	0	0	0	0	0	0	0	0	0	0	0	0	0.236051	0.388488	0.308053	0.815035	0.621509	0.275824	0.436639	0.366431	0.871894	0.689941
2513020848	90001	100000	0.413961	0.410928	0.542573	0.475593	0.429102	0.413587	0.420079	0.4647	0.465035	0.418707	0.44018	0.400885	0.454905	0.41634	0.435705	0.455929	0.455756	0.448477	0.450572	0.469079	0.41803	0.416459	0.445994	0.355438	0.445264	0.343396	0.35387	0.236046	0.387727	0.306708	0.812249	0.62528	0.275824	0.436639	0.366431	0.871894	0.689941
2513020848	95001	105000	0.413961	0.410928	0.542573	0.475593	0.429102	0.413587	0.420079	0.4647	0.465035	0.418707	0.44018	0.400885	0.454905	0.41634	0.435705	0.455929	0.455756	0.448477	0.450572	0.469079	0.41803	0.416459	0.445994	0.355438	0.445264	0.343396	0.35387	0.236047	0.38791	0.307314	0.813184	0.624801	0.275824	0.436639	0.366431	0.871894	0.689941
2513020848	100001	110000	0.413961	0.410928	0.398897	0.475593	0.429102	0.413587	0.420079	0.4647	0.465035	0.418707	0.44018	0.400885	0.454905	0.41634	0.435705	0.455929	0.455756	0.448477	0.450572	0.469079	0.41803	0.416459	0.445994	0.355438	0.445264	0.343396	0.35387	0.236048	0.388069	0.308509	0.814598	0.625407	0.275824	0.436639	0.366431	0.871894	0.689941
2513020848	105001	115000	0	0	0	0	0	0	0	0	0	0	0	0	0	0	0	0	0	0	0	0	0	0	0	0	0	0	0	0.236051	0.388488	0.309227	0.816099	0.623295	0.275824	0.436639	0.366431	0.871894	0.689941
2513020848	110001	120000	0	0	0	0	0	0	0	0	0	0	0	0	0	0	0	0	0	0	0	0	0	0	0	0	0	0	0	0.236051	0.388488	0.309227	0.816099	0.623295	0.275824	0.436639	0.366431	0.871894	0.689941
2513020848	115001	125000	0	0	0	0	0	0	0	0	0	0	0	0	0	0	0	0	0	0	0.138693	0	0	0	0	0	0	0	0.104341	0.236501	0.387873	0.310345	0.817861	0.622021	0.275824	0.436639	0.366431	0.871894	0.689941
2513020848	120001	130000	0	0	0	0	0	0	0	0	0	0	0	0	0	0	0	0	0	0	0.138693	0.103149	0	0	0	0	0	0	0.104341	0.235852	0.387812	0.311338	0.817498	0.621997	0.275824	0.436639	0.366431	0.871894	0.689941
2513020848	125001	135000	0	0	0	0	0	0	0	0	0	0	0	0	0	0	0	0	0	0	0.138693	0.103149	0	0	0	0	0	0	0.104341	0.235876	0.387892	0.311087	0.817333	0.622151	0.275824	0.436639	0.366431	0.871894	0.689941
2513020848	130001	140000	0	0	0	0	0	0	0	0	0	0	0	0	0	0	0	0	0	0	0	0.103149	0	0	0	0	0	0	0	0.235577	0.388322	0.310286	0.816113	0.623039	0.275824	0.436639	0.366431	0.871894	0.689941
2513020848	135001	145000	0	0	0	0.227459	0	0	0	0	0	0	0	0	0	0	0	0	0	0	0	0	0	0	0	0	0	0	0	0.235772	0.388769	0.308003	0.815513	0.622177	0.275824	0.436639	0.366431	0.871894	0.689941
2513020848	140001	150000	0	0	0	0.227459	0	0	0	0	0	0	0	0	0	0	0	0	0	0	0	0	0	0	0	0	0	0	0	0.235584	0.388961	0.307676	0.815064	0.621768	0.275824	0.436639	0.366431	0.871894	0.689941
2513020848	145001	155000	0	0	0	0.227459	0	0	0	0	0	0	0	0	0	0	0	0	0	0	0	0	0	0	0	0	0	0	0	0.235535	0.389012	0.307511	0.814954	0.621606	0.275824	0.436639	0.366431	0.871894	0.689941
2513020848	150001	160000	0	0	0	0	0	0	0	0	0	0	0	0	0	0	0	0	0	0	0	0	0	0	0	0	0	0	0	0.236051	0.388488	0.309684	0.816048	0.623613	0.275824	0.436639	0.366431	0.871894	0.689941
2513020848	155001	165000	0	0	0	0	0	0	0	0	0	0	0	0	0	0	0	0	0	0	0	0	0	0	0	0	0	0	0	0.236051	0.388488	0.309227	0.816099	0.623295	0.275824	0.436639	0.366431	0.871894	0.689941
2513020848	160001	170000	0	0	0	0	0	0	0	0	0	0	0	0	0	0	0	0	0	0	0	0	0	0	0	0	0	0	0	0.236051	0.388488	0.309227	0.816099	0.623295	0.275824	0.436639	0.366431	0.871894	0.689941
2513020848	165001	175000	0	0	0	0	0	0	0	0	0	0	0	0	0	0	0	0	0	0	0	0	0	0	0	0	0	0	0	0.236051	0.388488	0.309227	0.816099	0.623295	0.275824	0.436639	0.366431	0.871894	0.689941
2513020848	170001	180000	0	0	0	0	0	0	0	0	0	0	0	0	0	0	0	0	0	0	0	0	0	0	0	0	0	0	0	0.236051	0.388488	0.309227	0.816099	0.623295	0.275824	0.436639	0.366431	0.871894	0.689941
2513020848	175001	185000	0	0	0	0	0	0	0	0	0	0	0	0	0	0	0	0	0	0	0	0	0	0	0	0	0	0	0	0.236051	0.388488	0.309227	0.816099	0.623295	0.275824	0.436639	0.366431	0.871894	0.689941
2513020848	180001	190000	0	0	0	0	0	0	0	0	0	0	0	0	0	0	0	0	0	0	0	0.136446	0	0.155485	0	0	0	0	0	0.235781	0.387675	0.309825	0.81613	0.623663	0.275824	0.436639	0.366431	0.871894	0.689941
2513020848	185001	195000	0.242344	0	0.237414	0	0	0	0	0	0	0	0	0	0	0.26205	0	0.218024	0	0.21883	0	0.136446	0	0.381874	0.216375	0	0	0	0	0.232147	0.386194	0.311355	0.810242	0.621967	0.275824	0.436639	0.366431	0.871894	0.689941
2513020848	190001	200000	0.242344	0	0.237414	0	0	0	0	0	0	0	0	0	0	0.26205	0	0.218024	0	0.21883	0	0.136446	0	0.381874	0.216375	0	0	0	0	0.231721	0.385942	0.311591	0.809594	0.62182	0.275824	0.436639	0.366431	0.871894	0.689941
2513020848	195001	205000	0.242344	0	0.237414	0	0	0	0	0	0	0	0	0	0	0.26205	0	0.218024	0	0.21883	0	0	0	0.226389	0.216375	0	0	0	0	0.231715	0.38674	0.311036	0.809058	0.621269	0.275824	0.436639	0.366431	0.871894	0.689941
2513020848	200001	210000	0	0	0	0	0	0	0	0	0	0	0	0	0	0	0	0	0	0	0	0	0	0.162213	0	0	0	0	0	0.236577	0.387744	0.309897	0.816264	0.623205	0.275824	0.436639	0.366431	0.871894	0.689941
2513020848	205001	215000	0	0	0	0	0	0	0	0	0	0	0	0	0	0	0	0	0	0	0.131196	0	0	0.162213	0	0	0	0	0	0.236774	0.387292	0.310668	0.815871	0.62354	0.275824	0.436639	0.366431	0.871894	0.689941
2513020848	210001	220000	0	0	0	0	0	0	0	0	0	0	0	0	0	0	0	0	0	0	0.131196	0	0	0.162213	0	0	0	0	0	0.236747	0.387338	0.310613	0.815879	0.623531	0.275824	0.436639	0.366431	0.871894	0.689941
2513020848	215001	225000	0	0	0	0	0	0	0	0	0	0	0	0	0	0	0	0	0	0	0.131196	0	0	0	0	0	0	0	0	0.236161	0.388139	0.309948	0.815624	0.62369	0.275824	0.436639	0.366431	0.871894	0.689941
2513020848	220001	230000	0	0	0	0	0	0	0	0	0	0	0	0	0	0	0	0	0	0	0	0	0	0	0	0	0	0	0	0.236051	0.388488	0.309227	0.816099	0.623295	0.275824	0.436639	0.366431	0.871894	0.689941
2513020848	225001	235000	0	0	0	0	0	0	0	0	0	0	0	0	0	0	0	0	0	0	0	0	0	0	0	0	0	0	0	0.236051	0.388488	0.309227	0.816099	0.623295	0.275824	0.436639	0.366431	0.871894	0.689941
2513020848	230001	240000	0	0	0	0	0.160688	0.183796	0.143043	0	0.107764	0	0	0	0	0	0	0	0	0	0	0.145263	0	0	0	0	0	0	0	0.235227	0.386477	0.308114	0.815867	0.622881	0.275824	0.436639	0.366431	0.871894	0.689941
2513020848	235001	245000	0	0	0	0	0.160688	0.183796	0.143043	0	0.107764	0	0	0	0	0	0	0	0	0	0	0.145263	0	0	0	0	0	0	0	0.235065	0.386082	0.307896	0.815819	0.622788	0.275824	0.436639	0.366431	0.871894	0.689941
2513020848	240001	250000	0	0	0	0	0.160688	0.183796	0.143043	0	0.107764	0	0	0	0	0	0	0	0	0	0	0.145263	0	0	0	0	0	0	0	0.234776	0.385373	0.307505	0.815731	0.622614	0.275824	0.436639	0.366431	0.871894	0.689941
2513020848	245001	255000	0	0	0	0	0	0	0	0	0	0	0	0	0	0	0	0	0	0	0	0	0	0.0965758	0	0	0	0	0	0.236547	0.387787	0.309858	0.816255	0.623211	0.275824	0.436639	0.366431	0.871894	0.689941
2513020848	250001	260000	0	0	0	0	0.143128	0.121819	0	0	0	0	0	0	0	0	0.14646	0	0.182023	0	0.141852	0.176882	0	0.270283	0.134736	0	0	0	0	0.236983	0.383603	0.315343	0.812979	0.624984	0.275824	0.436639	0.366431	0.871894	0.689941
2513020848	255001	265000	0	0	0	0	0.143128	0.121819	0	0	0	0	0	0	0	0	0.14646	0	0.182023	0	0.141852	0.176882	0	0.270283	0.134736	0	0	0	0	0.237175	0.382621	0.316594	0.812338	0.625319	0.275824	0.436639	0.366431	0.871894	0.689941
2513020848	260001	270000	0	0	0	0	0.143128	0.121819	0	0	0	0	0	0	0	0	0.302836	0	0.338962	0	0.338406	0.176882	0	0.353168	0.134736	0	0	0	0	0.238757	0.377437	0.324567	0.805426	0.63051	0.275824	0.436639	0.366431	0.871894	0.689941
2513020848	265001	275000	11.2042	11.2214	14.9011	11.2803	12.3122	13.8176	11.0872	15.2957	18.9316	11.165	11.6766	11.3834	10.5159	9.7319	11.9471	9.61609	10.5659	10.38	10.1385	10.9841	9.97789	11.4089	9.85564	11.8435	10.9619	11.495	11.6063	0.275938	0.302294	0.149187	0.854056	0.537221	0.301024	0.436639	0.366431	0.880746	0.689941
2513020848	270001	280000	21.6455	19.8517	25.6439	20.4373	23.1724	23.1902	21.9585	24.4485	33.9546	20.9211	17.1378	16.9053	15.677	20.325	21.1894	18.078	16.3801	20.3904	15.3815	21.1439	16.0023	22.3402	19.3091	20.7571	16.097	20.3407	21.5577	0.188729	0.218882	0.138365	0.750901	0.415624	0.275824	0.436639	0.366431	0.871894	0.689941
2513020848	275001	285000	21.6455	19.8517	25.6439	20.4373	23.1724	23.1902	21.9585	24.4485	33.9546	20.9211	17.1378	16.9053	15.677	20.325	21.033	18.078	16.2232	20.3904	15.185	21.1439	16.0023	22.1607	19.3091	20.7571	16.097	20.3407	21.5577	0.194922	0.244559	0.159797	0.774854	0.45348	0.275824	0.436639	0.366431	0.871894	0.689941
2513020848	280001	290000	10.4413	8.63036	10.7429	9.30254	10.8602	9.52239	10.8713	9.15278	15.0231	9.7561	5.46112	5.52197	5.16109	10.5931	9.24226	8.46192	5.81423	10.0104	5.24306	10.1598	6.02443	10.9313	9.45347	9.04001	5.13516	8.98235	10.0816	0.16636	0.264936	0.232841	0.756621	0.479089	0.275824	0.436639	0.366431	0.871894	0.689941
2513020848	285001	295000	0	0	0	0.145547	0	0.149789	0	0	0	0	0	0	0	0	0	0	0	0	0	0	0	0	0	0.12642	0	0.136667	0.130255	0.236184	0.388657	0.309163	0.819246	0.619684	0.275824	0.436639	0.366431	0.871894	0.689941
2513020848	290001	300000	0.263862	0	0	0.145547	0	0.149789	0	0	0	0	0	0	0	0	0	0	0	0.375776	0.367214	0.456041	0	0.117991	0	0.12642	0	0.136667	0.130255	0.223543	0.382668	0.316003	0.813008	0.61689	0.275824	0.436639	0.366431	0.871894	0.689941
2513020848	295001	305000	0.263862	0	0	0	0.178764	0.181118	0	0	0	0	0	0	0	0	0	0	0	0.375776	0.367214	0.456041	0	0.117991	0	0	0	0	0	0.223351	0.381627	0.312891	0.807408	0.621226	0.275824	0.436639	0.366431	0.871894	0.689941
2513020848	300001	310000	0.578814	0.327558	0.358109	0	0.178764	0.181118	0	0	0	0	0	0	0	0.367293	0	0	0	0.757221	0.367214	0.784714	0	0.117991	0	0	0	0	0	0.204396	0.375278	0.316096	0.786231	0.606673	0.275824	0.436639	0.366431	0.871894	0.689941
2513020848	305001	315000	0.314952	0.327558	0.358109	0	0.178764	0.181118	0	0	0	0	0	0	0	0.367293	0	0	0	0.381445	0	0.328674	0	0	0	0	0	0	0	0.220223	0.382835	0.30856	0.798575	0.609828	0.275824	0.436639	0.366431	0.871894	0.689941
2513020848	310001	320000	0.314952	0.327558	0.358109	0	0	0	0	0	0	0	0	0	0	0.367293	0	0	0	0.381445	0	0.328674	0	0	0	0	0	0	0	0.224029	0.384759	0.310999	0.803308	0.614147	0.275824	0.436639	0.366431	0.871894	0.689941
2513020848	315001	325000	0	0	0	0	0	0	0	0	0.199311	0.17289	0	0.213242	0.168887	0	0	0	0	0.166133	0	0.152268	0	0.172237	0	0	0	0	0	0.234861	0.392235	0.310393	0.818773	0.62887	0.275824	0.436639	0.366431	0.871894	0.689941
2513020848	320001	330000	0	0	0	0	0	0	0	0	0.199311	0.316335	0	0.213242	0.168887	0	0.0964825	0	0	0.308174	0	0.152268	0	0.172237	0	0	0	0	0	0.233666	0.391245	0.310401	0.817108	0.62876	0.275824	0.436639	0.366431	0.871894	0.689941
2513020848	325001	335000	0	0	0.208493	0	0	0	0.164038	0	0.199311	0.316335	0	0.213242	0.168887	0	0.0964825	0	0	0.308174	0	0.152268	0	0.305604	0	0	0	0	0	0.233894	0.390456	0.309233	0.816496	0.627954	0.275824	0.436639	0.366431	0.871894	0.689941
2513020848	330001	340000	0	0	0.208493	0	0	0	0.164038	0	0	0.143445	0	0	0	0	0.0964825	0	0.127422	0.142041	0	0	0	0.133367	0	0	0	0	0	0.235303	0.386514	0.309668	0.813147	0.6221	0.275824	0.436639	0.366431	0.871894	0.689941
2513020848	335001	345000	0	0	0.208493	0.0962326	0	0	0.164038	0	0	0	0	0	0	0	0	0	0.127422	0	0	0	0	0.232409	0	0	0	0	0	0.237153	0.386826	0.309357	0.814605	0.62084	0.275824	0.436639	0.366431	0.871894	0.689941
2513020848	340001	350000	0	0	0	0.0962326	0	0	0.151218	0	0	0	0	0	0	0.13645	0	0.161641	0.127422	0	0	0	0	0.233779	0.122724	0	0	0	0.120994	0.237556	0.386581	0.31525	0.816483	0.621943	0.275824	0.436639	0.366431	0.871894	0.689941
2513020848	345001	355000	0	0	0	0.0962326	0	0	0.151218	0	0	0	0	0	0	0.13645	0	0.161641	0	0	0	0	0	0.233779	0.122724	0	0	0	0.120994	0.23689	0.387129	0.311796	0.816845	0.622388	0.275824	0.436639	0.366431	0.871894	0.689941
2513020848	350001	360000	0	0	0	0	0	0	0.151218	0	0	0	0	0	0	0.13645	0	0.161641	0	0	0	0	0	0.134736	0.122724	0	0	0	0.120994	0.236601	0.387606	0.311548	0.81688	0.623003	0.275824	0.436639	0.366431	0.871894	0.689941
2513020848	355001	365000	0	0	0	0	0	0	0	0	0	0	0	0	0	0	0	0	0	0	0	0	0	0	0	0	0	0	0	0.236051	0.388488	0.309227	0.816099	0.623295	0.275824	0.436639	0.366431	0.871894	0.689941
2513020848	360001	370000	0	0	0	0	0	0	0	0	0	0	0	0	0	0	0	0	0	0	0	0	0	0	0	0	0	0	0	0.236051	0.388488	0.3096	0.816058	0.623554	0.275824	0.436639	0.366431	0.871894	0.689941
2513020848	365001	375000	0	0	0	0	0	0	0	0	0	0	0	0	0	0	0	0	0	0	0	0	0	0	0	0	0	0	0	0.236051	0.388488	0.309749	0.816041	0.623658	0.275824	0.436639	0.366431	0.871894	0.689941
2513020848	370001	380000	0	0	0	0	0	0	0	0	0	0	0	0	0	0	0	0	0	0	0	0	0	0	0	0	0	0	0	0.236051	0.388488	0.312461	0.81565	0.623345	0.275824	0.436639	0.366431	0.871894	0.689941
2513020848	375001	385000	0	0	0	0	0	0	0	0	0	0	0	0	0	0	0	0	0	0	0	0	0	0	0	0	0	0	0	0.236051	0.388488	0.311449	0.815789	0.623133	0.275824	0.436639	0.366431	0.871894	0.689941
2513020848	380001	390000	0	0	0.15944	0	0	0	0	0	0	0	0	0	0	0	0	0	0	0	0	0	0	0	0	0	0	0	0	0.236051	0.388488	0.310647	0.815086	0.621952	0.275824	0.436639	0.366431	0.871894	0.689941
2513020848	385001	395000	0	0	0.15944	0	0	0	0	0	0	0	0	0	0	0	0	0	0	0	0	0	0	0	0	0	0	0	0	0.236051	0.388488	0.308358	0.815312	0.621973	0.275824	0.436639	0.366431	0.871894	0.689941
2513020848	390001	400000	0	0.196318	0.15944	0	0.163288	0	0	0	0	0	0	0	0	0	0	0	0	0	0.100376	0	0	0	0	0	0	0	0	0.236909	0.388123	0.305005	0.811792	0.617028	0.275824	0.436639	0.366431	0.871894	0.689941
2513020848	395001	405000	0	0.196318	0	0	0.163288	0	0	0	0	0	0	0	0	0	0	0	0.123428	0.123935	0.100376	0	0	0.130139	0	0	0	0	0	0.235651	0.386852	0.309036	0.812217	0.621055	0.275824	0.436639	0.366431	0.871894	0.689941
2513020848	400001	410000	0	0.196318	0	0	0.163288	0	0	0	0	0	0	0	0	0	0	0	0.123428	0.123935	0.100376	0	0	0.130139	0	0	0	0	0	0.23577	0.387341	0.309092	0.813384	0.621726	0.275824	0.436639	0.366431	0.871894	0.689941
2513020848	405001	415000	0	0.225274	0	0.139929	0	0	0	0	0	0	0	0	0	0	0	0	0.123428	0.123935	0	0	0	0.130139	0	0	0	0.109851	0	0.2359	0.387852	0.309332	0.814601	0.621029	0.275824	0.436639	0.366431	0.871894	0.689941
2513020848	410001	420000	0	0.225274	0	0.471592	0	0	0	0	0	0	0	0	0	0	0	0	0	0	0	0	0	0	0	0	0	0.109851	0	0.236212	0.388975	0.306505	0.814601	0.618815	0.275824	0.436639	0.366431	0.871894	0.689941
2513020848	415001	425000	0	0.225274	0	0.471592	0	0	0	0	0	0	0	0	0	0	0	0	0	0	0	0	0	0	0	0	0	0.109851	0	0.23624	0.389059	0.306048	0.814347	0.618062	0.275824	0.436639	0.366431	0.871894	0.689941
2513020848	420001	430000	0	0	0	0.331663	0	0	0	0	0	0	0	0	0	0	0	0	0	0	0	0	0	0	0	0	0	0	0	0.235627	0.388918	0.307364	0.815207	0.621592	0.275824	0.436639	0.366431	0.871894	0.689941
2513020848	425001	435000	0	0	0	0	0	0	0	0	0	0	0	0	0	0	0	0	0	0	0	0.152592	0	0.120203	0	0	0	0	0	0.235512	0.387627	0.310527	0.815979	0.623563	0.275824	0.436639	0.366431	0.871894	0.689941
2513020848	430001	440000	0	0	0	0.454141	0	0	0	0	0	0	0	0	0	0	0	0	0	0	0	0.152592	0	0.120203	0	0	0	0	0	0.234456	0.388107	0.307421	0.814174	0.62034	0.275824	0.436639	0.366431	0.871894	0.689941
2513020848	435001	445000	0	0	0	0.454141	0	0	0	0	0	0	0	0	0	0	0	0	0	0	0	0.152592	0	0.120203	0	0	0	0	0	0.234831	0.388195	0.307847	0.814631	0.621039	0.275824	0.436639	0.366431	0.871894	0.689941
2513020848	440001	450000	0	0	0	0.454141	0	0	0	0	0	0	0	0	0	0	0	0	0	0	0	0	0	0	0	0	0	0	0	0.235529	0.389018	0.306933	0.815	0.621198	0.275824	0.436639	0.366431	0.871894	0.689941
2513020848	445001	455000	0	0	0	0.436583	0	0	0	0	0	0	0	0	0	0	0	0	0	0	0	0	0	0	0	0	0	0.119936	0	0.235614	0.388931	0.309036	0.815828	0.620823	0.275824	0.436639	0.366431	0.871894	0.689941
2513020848	450001	460000	0	0	0.335887	0.544571	0	0	0	0	0	0.200313	0.180924	0	0	0	0	0.150061	0.135482	0	0.126159	0.148265	0.129442	0.278846	0	0	0	0.119936	0	0.236653	0.387598	0.308587	0.812041	0.618367	0.275824	0.436639	0.366431	0.871894	0.689941
2513020848	455001	465000	0.203755	0	0.335887	0.544571	0	0	0	0	0	0.200313	0.180924	0	0.22216	0	0	0.150061	0.135482	0.18294	0.293847	0.148265	0.309715	0.451591	0	0	0	0.119936	0	0.235702	0.38772	0.30915	0.811184	0.620773	0.275824	0.436639	0.366431	0.871894	0.689941
2513020848	460001	470000	0.203755	0	0.335887	0.107988	0.147407	0	0	0	0	0.200313	0.180924	0	0.22216	0	0	0.150061	0.135482	0.18294	0.293847	0.148265	0.309715	0.451591	0	0	0	0	0	0.236089	0.387076	0.308499	0.81129	0.623697	0.275824	0.436639	0.366431	0.871894	0.689941
2513020848	465001	475000	0.203755	0	0	0	0.147407	0	0	0	0	0	0	0	0.22216	0.136769	0	0.120203	0.117808	0.18294	0.270868	0.117571	0.180273	0.291619	0	0	0	0	0	0.233671	0.388227	0.313144	0.812651	0.627874	0.275824	0.436639	0.366431	0.871894	0.689941
2513020848	470001	480000	0	0	0	0	0.147407	0	0	0	0	0	0	0	0	0.136769	0	0.120203	0.117808	0	0.103181	0.117571	0	0.118873	0	0	0	0	0	0.234517	0.387913	0.312913	0.812485	0.624983	0.275824	0.436639	0.366431	0.871894	0.689941
2513020848	475001	485000	0	0	0	0	0	0	0	0	0	0	0	0	0	0.136769	0	0.120203	0.117808	0	0.103181	0.117571	0	0.118873	0	0	0	0	0	0.234738	0.387895	0.314076	0.812644	0.625652	0.275824	0.436639	0.366431	0.871894	0.689941
2513020848	480001	490000	0	0	0	0	0	0	0	0	0	0	0	0	0	0.219916	0.165316	0	0	0	0	0	0.163182	0.168857	0.127415	0	0	0	0.117729	0.235693	0.384298	0.315282	0.815867	0.624333	0.275824	0.436639	0.366431	0.871894	0.689941
2513020848	485001	495000	0	0	0	0	0	0	0	0	0	0	0	0	0	0.219916	0.165316	0	0	0	0	0	0.163182	0.269318	0.127415	0	0	0	0.117729	0.23614	0.383295	0.31639	0.815992	0.624337	0.275824	0.436639	0.366431	0.871894	0.689941
2513020848	490001	500000	0	0	0	0	0	0	0	0	0.113054	0	0	0	0	0.219916	0.165316	0	0	0	0	0	0.163182	0.269318	0.127415	0	0	0	0.117729	0.236119	0.384211	0.314483	0.81647	0.624877	0.275824	0.436639	0.366431	0.871894	0.689941
2513020848	495001	505000	0	0	0	0	0	0	0	0	0.113054	0	0	0	0	0	0	0	0	0	0	0	0	0.100461	0	0	0	0	0	0.236456	0.387716	0.309341	0.816718	0.62405	0.275824	0.436639	0.366431	0.871894	0.689941
2513020848	500001	510000	0	0	0	0	0	0	0	0	0.113054	0	0	0	0	0	0	0	0	0	0	0	0	0	0	0	0	0	0	0.236051	0.388322	0.30831	0.816607	0.62444	0.275824	0.436639	0.366431	0.871894	0.689941
2513020848	505001	515000	0	0	0	0	0	0	0	0	0	0	0	0	0	0	0	0	0	0	0	0	0	0	0	0	0	0	0	0.236051	0.388488	0.308433	0.816231	0.623918	0.275824	0.436639	0.366431	0.871894	0.689941
2513020848	510001	520000	0	0	0	0	0	0	0	0	0	0	0	0	0	0	0	0	0	0	0	0	0	0	0	0	0	0	0	0.236051	0.388488	0.308414	0.816235	0.623933	0.275824	0.436639	0.366431	0.871894	0.689941
2513020848	515001	525000	0	0	0	0	0	0	0	0	0	0	0	0	0	0	0.11205	0	0.14204	0	0.238151	0	0	0.13524	0	0	0	0	0.107337	0.239039	0.38313	0.317761	0.815857	0.623929	0.275824	0.436639	0.366431	0.871894	0.689941
2513020848	520001	530000	0	0	0	0	0	0	0	0	0	0	0	0	0	0	0.11205	0	0.14204	0	0.34516	0	0	0.13524	0	0	0	0	0.107337	0.241691	0.378186	0.326532	0.814292	0.625658	0.275824	0.436639	0.366431	0.871894	0.689941
2513020848	525001	535000	0	0	0	0	0	0	0	0	0	0	0	0	0	0	0.11205	0	0.14204	0	0.34516	0	0	0.13524	0	0	0	0	0.107337	0.256681	0.354708	0.371881	0.810383	0.632403	0.284456	0.436639	0.398013	0.871894	0.689941
2513020848	530001	540000	0.958886	0.48484	1.06486	0.666561	1.30554	0.985745	1.224	0.780494	0	0.51855	0	0.462026	0.35556	0.404129	0.21961	1.34624	1.89411	0.779548	0.791164	0.965481	0.762397	1.03382	0.32902	1.8027	0.457052	1.46347	1.58618	0.258711	0.393099	0.48209	0.889719	0.368136	0.285759	0.436639	0.500632	0.906568	0.689941
2513020848	535001	545000	0.958886	0.48484	1.24176	0.666561	1.30554	0.985745	1.224	0.780494	0	0.51855	0.154347	0.462026	0.35556	0.404129	0.21961	1.34624	1.89411	0.779548	0.918049	0.965481	0.762397	1.03382	0.32902	1.8027	0.457052	1.46347	1.58618	0.239469	0.384513	0.359092	0.845592	0.529018	0.275824	0.436639	0.387115	0.876583	0.689941
2513020848	540001	550000	0.958886	0.48484	1.24176	0.666561	1.30554	0.985745	1.224	0.780494	0	0.51855	0.154347	0.462026	0.35556	0.404129	0.21961	1.34624	3.2382	0.779548	0.918049	0.965481	0.762397	1.03382	0.32902	1.8027	0.457052	1.46347	1.58618	0.243938	0.385406	0.357177	0.823944	0.567806	0.275848	0.436639	0.385401	0.871894	0.689941
2513020848	545001	555000	0	0	0.176893	0	0.258181	0	0	0	0	0	0.154347	0	0	0	0	0	1.34409	0	0.233894	0	0	0	0	0	0	0	0	0.241787	0.385412	0.324202	0.793555	0.632525	0.275824	0.436639	0.366431	0.871894	0.689941
2513020848	550001	560000	0	0	0	0	0.258181	0	0	0	0	0	0	0	0	0	0	0	1.34409	0	0.107687	0	0	0	0	0	0	0	0	0.254077	0.38697	0.345056	0.761742	0.660947	0.282096	0.436639	0.376425	0.871894	0.698628
2513020848	555001	565000	0	0	0	0	0.258181	0	0	0	0	0	0	0	0	0	0	0	0	0	0.107687	0	0	0	0	0	0	0	0	0.234837	0.387635	0.305205	0.813435	0.620812	0.275824	0.436639	0.366431	0.871894	0.689941
2513020848	560001	570000	0.162698	0.130973	0.218053	0.10877	0.0975071	0	0	0.106071	0.118196	0	0.105282	0.114212	0.136134	0.112292	0.0967583	0.108216	0.118196	0.11574	0.237076	0.109145	0.104953	0.110739	0	0	0.132689	0.119329	0.0964429	0.235098	0.38928	0.309725	0.813821	0.622773	0.275824	0.436639	0.366431	0.871894	0.689941
2513020848	565001	575000	0.162698	0.130973	0.218053	0.353065	0.0975071	0	0	0.106071	0.118196	0	0.105282	0.114212	0.136134	0.112292	0.0967583	0.108216	0.118196	0.11574	0.129389	0.109145	0.104953	0.110739	0	0	0.132689	0.119329	0.0964429	0.234959	0.38962	0.307671	0.81406	0.621336	0.275824	0.436639	0.366431	0.871894	0.689941
2513020848	570001	580000	0.162698	0.130973	0.218053	0.353065	0.0975071	0	0	0.106071	0.118196	0	0.105282	0.114212	0.136134	0.112292	0.302254	0.27138	0.118196	0.11574	0.324091	0.109145	0.104953	0.110739	0	0	0.132689	0.119329	0.0964429	0.235338	0.389435	0.310167	0.81016	0.623992	0.275824	0.436639	0.366431	0.871894	0.689941
2513020848	575001	585000	2.48598	1.96892	1.91233	2.71007	1.95035	1.95951	1.95411	2.50155	2.48812	2.49848	2.49108	2.50761	2.50449	2.50155	2.71155	2.66595	2.50744	2.47513	2.69765	2.49847	2.5058	2.50397	2.65647	1.91223	2.50794	1.94705	1.95451	0.234265	0.390686	0.324402	0.802228	0.651586	0.275824	0.436639	0.366431	0.871894	0.695493
2513020848	580001	590000	2.48598	1.96892	1.91233	2.46578	1.95035	1.95951	1.95411	2.50155	2.48812	2.49848	2.49108	2.50761	2.50449	2.50155	2.71155	2.66595	2.50744	2.47513	2.69765	2.49847	2.5058	2.50397	2.65647	1.91223	2.50794	1.94705	1.95451	0.234639	0.3903	0.325922	0.803125	0.652793	0.275824	0.436639	0.366431	0.871894	0.696157
2513020848	585001	595000	2.48598	1.96892	1.91233	2.46578	1.95035	1.95951	1.95411	2.50155	2.48812	2.49848	2.49108	2.50761	2.50449	2.50155	2.50605	2.50279	2.50744	2.47513	2.50295	2.49847	2.5058	2.50397	2.65647	1.91223	2.50794	1.94705	1.95451	0.234595	0.389989	0.319459	0.809285	0.642997	0.275824	0.436639	0.366431	0.871894	0.691883
2513020848	590001	600000	0.325926	0.598379	0.132563	0.422434	0.303431	0.698553	0.333506	0.393306	0.354239	0.573326	0.58565	0.284362	0.472912	0.294307	0.397905	0.301678	0.557266	0.315478	0.47198	0.346681	0.458146	0.403761	0.311739	0.414876	0.275643	0.358817	0.652616	0.240691	0.384843	0.310707	0.820243	0.620299	0.275824	0.436639	0.366431	0.871894	0.689941
2513020848	595001	605000	0.325926	0.598379	0.132563	0.422434	0.500081	0.698553	0.578854	0.393306	0.354239	0.573326	0.58565	0.503178	0.472912	0.480157	0.397905	0.301678	0.753786	0.315478	0.47198	0.541139	0.458146	0.584975	0.311739	0.414876	0.275643	0.358817	0.814475	0.239654	0.384822	0.31315	0.822905	0.621164	0.275824	0.436639	0.366431	0.871894	0.689941
2513020848	600001	610000	0.325926	0.598379	0.132563	0.422434	0.500081	0.698553	0.578854	0.393306	0.354239	0.573326	0.58565	0.503178	0.472912	0.480157	0.397905	0.301678	0.753786	0.315478	0.47198	0.541139	0.458146	0.584975	0.311739	0.414876	0.275643	0.358817	0.814475	0.239597	0.38488	0.313087	0.822799	0.621197	0.275824	0.436639	0.366431	0.871894	0.689941
2513020848	605001	615000	0	0	0	0	0.196649	0	0.245347	0	0	0	0	0.218816	0	0.185849	0	0	0.196519	0	0	0.194458	0	0.181214	0	0	0	0	0.161859	0.234505	0.389032	0.310999	0.817675	0.624454	0.275824	0.436639	0.366431	0.871894	0.689941
2513020848	610001	620000	0	0	0	0	0	0	0	0	0	0	0	0	0	0	0	0	0	0	0	0	0	0	0	0	0	0	0	0.236051	0.388488	0.309227	0.816099	0.623295	0.275824	0.436639	0.366431	0.871894	0.689941
2513020848	615001	625000	0.19797	0.237782	0	0	0.199946	0.238082	0.236184	0	0	0	0	0	0	0	0	0	0	0	0	0	0	0	0	0.268066	0	0.229761	0.201079	0.236019	0.387485	0.305814	0.818523	0.613338	0.275824	0.436639	0.366431	0.871894	0.689941
2513020848	620001	630000	0.362083	0.237782	0.197588	0.124223	0.199946	0.424752	0.236184	0	0	0	0	0.223011	0	0.158496	0	0	0	0	0.18363	0.139299	0.173079	0	0.134068	0.469489	0	0.229761	0.201079	0.233102	0.390181	0.304632	0.815167	0.609598	0.275824	0.436639	0.366431	0.871894	0.689941
2513020848	625001	635000	0.362083	0.237782	0.197588	0.243414	0.199946	0.424752	0.236184	0	0	0	0	0.223011	0	0.158496	0	0	0	0	0.18363	0.139299	0.173079	0	0.134068	0.469489	0	0.229761	0.201079	0.232685	0.390515	0.303402	0.814665	0.607769	0.275824	0.436639	0.366431	0.871894	0.689941
2513020848	630001	640000	0.402897	0	0.197588	0.243414	0	0.18667	0	0	0	0	0	0.223011	0	0.158496	0	0	0	0	0.18363	0.139299	0.173079	0	0.134068	0.201423	0	0	0	0.232524	0.390319	0.307154	0.811224	0.619299	0.275824	0.436639	0.366431	0.871894	0.689941
2513020848	635001	645000	0.238784	0	0	0.119192	0	0	0	0	0	0	0	0	0	0	0	0	0	0	0	0.124315	0	0.100903	0	0	0	0	0	0.234471	0.387676	0.308301	0.814333	0.620568	0.275824	0.436639	0.366431	0.871894	0.689941
2513020848	640001	650000	0.238784	0	0	0	0	0	0	0	0	0	0	0	0	0	0	0	0	0	0	0.124315	0	0.100903	0	0	0	0	0	0.234638	0.387586	0.308838	0.814634	0.62112	0.275824	0.436639	0.366431	0.871894	0.689941
2513020848	645001	655000	0	0	0	0.168708	0	0	0	0	0	0	0	0	0	0	0	0	0	0	0	0.124315	0	0.100903	0	0	0	0	0	0.23543	0.388009	0.30941	0.815923	0.622541	0.275824	0.436639	0.366431	0.871894	0.689941
2513020848	650001	660000	0	0	0	0.395346	0	0	0	0	0	0	0	0	0	0	0	0	0	0	0	0.143315	0	0	0	0	0	0	0	0.234622	0.388713	0.308862	0.815754	0.621238	0.275824	0.436639	0.366431	0.871894	0.689941
2513020848	655001	665000	0	0	0	0.395346	0	0	0	0	0.131948	0	0	0	0	0	0	0	0	0	0	0.143315	0	0	0	0	0	0	0	0.234566	0.388523	0.308398	0.816235	0.621951	0.275824	0.436639	0.366431	0.871894	0.689941
2513020848	660001	670000	0	0	0	0.226638	0	0	0	0	0.131948	0	0	0	0	0	0	0	0	0	0	0.143315	0	0	0	0	0	0	0	0.234616	0.388254	0.309165	0.816386	0.622851	0.275824	0.436639	0.366431	0.871894	0.689941
2513020848	665001	675000	0	0	0	0	0	0	0	0	0.131948	0	0	0	0	0	0	0	0	0	0	0	0	0	0	0	0	0	0	0.236051	0.388246	0.308675	0.816705	0.624256	0.275824	0.436639	0.366431	0.871894	0.689941
2513020848	670001	680000	0	0	0	0	0	0	0	0	0	0	0	0	0	0	0	0	0	0	0	0	0	0	0	0	0	0	0	0.236051	0.388488	0.309227	0.816099	0.623295	0.275824	0.436639	0.366431	0.871894	0.689941
2513020848	675001	685000	0	0	0	0	0	0	0	0	0	0	0	0	0	0	0	0	0	0	0	0	0	0	0	0	0	0	0	0.236051	0.388488	0.309227	0.816099	0.623295	0.275824	0.436639	0.366431	0.871894	0.689941
2513020848	680001	690000	0	0	0	0	0	0	0	0	0	0	0	0	0	0	0	0	0.18133	0.186908	0	0.15511	0.172664	0.150156	0	0.14706	0	0	0	0.233774	0.387164	0.313894	0.813967	0.625131	0.275824	0.436639	0.366431	0.871894	0.689941
2513020848	685001	695000	0	0	0	0	0	0	0	0	0	0	0	0	0	0	0.106218	0.128262	0.18133	0.186908	0.106556	0.290345	0.172664	0.150156	0	0.14706	0	0	0	0.233517	0.387148	0.316815	0.812489	0.626161	0.275824	0.436639	0.366431	0.871894	0.689941
2513020848	690001	700000	0	0	0	0	0	0	0	0	0	0	0	0	0	0	0.106218	0.128262	0.18133	0.186908	0.106556	0.290345	0.172664	0.150156	0	0.14706	0	0	0	0.233953	0.387379	0.315493	0.813118	0.625667	0.275824	0.436639	0.366431	0.871894	0.689941
2513020848	695001	705000	0	0	0	0	0	0	0	0	0	0	0	0	0	0	0.106218	0.128262	0	0	0.106556	0.135235	0	0	0	0	0	0	0	0.235557	0.388341	0.312704	0.814367	0.624558	0.275824	0.436639	0.366431	0.871894	0.689941
2513020848	700001	710000	0.22908	0.31735	0.307831	0	0.288384	0	0	0	0.199785	0.214966	0	0	0.146743	0	0	0	0.13186	0.126228	0.243195	0.0994564	0	0	0	0	0	0	0.112415	0.234745	0.388476	0.301361	0.811374	0.615355	0.275824	0.436639	0.366431	0.871894	0.689941
2513020848	705001	715000	0.22908	0.31735	0.307831	0	0.288384	0	0	0	0.199785	0.214966	0	0.196664	0.146743	0	0	0	0.13186	0.126228	0.36058	0.0994564	0	0	0	0	0	0	0.112415	0.234449	0.3934	0.297448	0.810344	0.615474	0.275824	0.436639	0.366431	0.871894	0.689941
2513020848	710001	720000	0.22908	0.31735	0.307831	0	0.288384	0	0	0	0.199785	0.214966	0	0.196664	0.146743	0	0	0	0.13186	0.126228	0.36058	0.0994564	0	0	0	0	0	0	0.112415	0.234922	0.391922	0.300936	0.812073	0.617819	0.275824	0.436639	0.366431	0.871894	0.689941
2513020848	715001	725000	0	0	0	0	0	0	0	0	0	0	0	0.196664	0	0	0	0	0	0	0.117386	0	0	0	0	0	0	0	0	0.236166	0.391198	0.308735	0.816562	0.62509	0.275824	0.436639	0.366431	0.871894	0.689941
2513020848	720001	730000	0.250496	0	0	0	0	0.132817	0	0	0	0.30091	0	0	0.321917	0.240475	0	0.29088	0.294539	0.196343	0.498892	0.267911	0.243472	0.452735	0	0	0	0	0	0.234707	0.388701	0.316524	0.810512	0.630702	0.275824	0.436639	0.366431	0.871894	0.689941
2513020848	725001	735000	0.250496	0	0	0	0	0.132817	0	0	0	0.30091	0	0	0.321917	0.240475	0	0.29088	0.294539	0.196343	0.498892	0.267911	0.243472	0.452735	0	0	0	0	0	0.2346	0.388719	0.317122	0.810057	0.631302	0.275824	0.436639	0.366431	0.871894	0.689941
2513020848	730001	740000	0.479104	0	0	0	0.241067	0.359305	0.203616	0	0	0.46224	0	0	0.321917	0.240475	0	0.29088	0.294539	0.196343	0.640537	0.42868	0.243472	0.452735	0	0	0	0	0	0.232605	0.386447	0.315539	0.806538	0.628047	0.275824	0.436639	0.366431	0.871894	0.689941
2513020848	735001	745000	0.228608	0	0	0	0.241067	0.226489	0.203616	0	0	0.16133	0	0	0	0	0	0	0	0	0.141645	0.160769	0	0	0	0	0	0.227443	0	0.234524	0.386595	0.308031	0.815471	0.618633	0.275824	0.436639	0.366431	0.871894	0.689941
2513020848	740001	750000	0.228608	0	0	0	0.241067	0.226489	0.203616	0	0	0.16133	0	0	0	0	0	0	0	0	0.141645	0.160769	0	0	0	0	0	0.227443	0	0.234738	0.38686	0.308199	0.815559	0.61929	0.275824	0.436639	0.366431	0.871894	0.689941
2513020848	745001	755000	0	0.149744	0	0	0	0.0960783	0	0	0	0.132245	0	0	0	0.17005	0	0.180501	0	0	0.159363	0.125756	0.152524	0	0.121634	0	0	0.227443	0	0.236184	0.388119	0.312981	0.814823	0.622113	0.275824	0.436639	0.366431	0.871894	0.689941
2513020848	750001	760000	0	0.149744	0	0	0	0.0960783	0	0	0	0.132245	0	0	0	0.17005	0	0.180501	0	0	0.159363	0.125756	0.152524	0	0.121634	0	0	0	0	0.23624	0.387969	0.313477	0.811972	0.623312	0.275824	0.436639	0.366431	0.871894	0.689941
2513020848	755001	765000	0	0.149744	0	0	0	0.0960783	0	0	0	0.132245	0	0	0	0.17005	0	0.180501	0	0	0.159363	0.125756	0.152524	0	0.121634	0	0	0	0	0.236328	0.38774	0.315395	0.810116	0.623312	0.275824	0.436639	0.366431	0.871894	0.689941
2513020848	760001	770000	0	0	0	0	0	0	0	0	0	0	0	0	0	0	0	0	0	0	0	0	0	0	0	0	0	0	0	0.236051	0.388488	0.309227	0.816099	0.623295	0.275824	0.436639	0.366431	0.871894	0.689941
2513020848	765001	775000	0	0	0	0	0	0	0	0	0	0	0	0	0	0	0	0	0	0	0	0	0	0	0	0	0	0	0	0.236051	0.388488	0.309227	0.816099	0.623295	0.275824	0.436639	0.366431	0.871894	0.689941
2513020848	770001	780000	0	0	0	0	0	0	0	0	0	0	0	0	0	0	0	0	0	0	0	0	0	0	0	0	0	0	0	0.236051	0.388488	0.309227	0.816099	0.623295	0.275824	0.436639	0.366431	0.871894	0.689941
2513020848	775001	785000	0	0	0	0	0	0	0	0	0	0	0	0	0	0	0	0	0	0	0	0	0	0	0	0	0	0	0	0.236051	0.388488	0.309227	0.816099	0.623295	0.275824	0.436639	0.366431	0.871894	0.689941
2513020848	780001	790000	0	0	0	0	0	0	0	0	0	0	0	0	0	0	0	0	0	0	0	0	0	0	0	0	0	0	0.163454	0.236733	0.387899	0.310151	0.820297	0.62016	0.275824	0.436639	0.366431	0.871894	0.689941
2513020848	785001	795000	0	0	0	0	0	0	0	0	0	0	0	0	0	0	0	0	0	0	0	0	0	0	0	0	0	0	0.163454	0.236572	0.388038	0.309933	0.819309	0.6209	0.275824	0.436639	0.366431	0.871894	0.689941
2513020848	790001	800000	0	0	0	0	0	0	0	0	0	0	0	0	0	0	0	0	0	0.109419	0	0	0	0	0	0	0	0	0.163454	0.235373	0.387842	0.31019	0.818358	0.621635	0.275824	0.436639	0.366431	0.871894	0.689941
2513020848	795001	805000	0.22201	0	0	0	0.218816	0	0	0.249018	0	0.217332	0	0	0	0	0	0.213868	0	0.109419	0	0.162336	0	0	0.179046	0	0	0	0	0.234729	0.385935	0.309424	0.812579	0.620773	0.275824	0.436639	0.366431	0.871894	0.689941
2513020848	800001	810000	0.22201	0	0	0	0.218816	0	0	0.249018	0	0.217332	0	0	0	0	0	0.213868	0	0.109419	0	0.162336	0	0	0.179046	0	0	0	0	0.234723	0.385923	0.309424	0.812563	0.620762	0.275824	0.436639	0.366431	0.871894	0.689941
2513020848	805001	815000	0.22201	0	0	0	0.218816	0	0	0.249018	0	0.217332	0	0	0	0	0	0.213868	0	0	0	0.162336	0	0	0.179046	0	0	0	0	0.23606	0.385825	0.308909	0.812411	0.619839	0.275824	0.436639	0.366431	0.871894	0.689941
2513020848	810001	820000	0	0	0	0	0	0	0	0	0	0	0	0	0	0	0	0	0	0	0.150951	0	0	0.120227	0	0	0	0	0	0.236648	0.387438	0.310854	0.81572	0.623805	0.275824	0.436639	0.366431	0.871894	0.689941
2513020848	815001	825000	0	0	0	0	0	0	0	0	0	0.117403	0	0	0	0	0	0	0	0	0.150951	0	0	0.120227	0	0	0	0	0	0.236866	0.387586	0.31009	0.8153	0.623395	0.275824	0.436639	0.366431	0.871894	0.689941
2513020848	820001	830000	0	0	0.178423	0	0	0	0	0	0	0.117403	0	0	0	0	0	0	0	0	0.150951	0	0	0.120227	0	0	0	0	0.105182	0.237063	0.387449	0.309257	0.816559	0.620035	0.275824	0.436639	0.366431	0.871894	0.689941
2513020848	825001	835000	0	0	0.178423	0.122777	0	0	0	0	0	0.117403	0	0	0	0	0	0	0	0	0.139511	0	0	0	0	0	0	0	0.105182	0.236485	0.388231	0.307574	0.816111	0.618939	0.275824	0.436639	0.366431	0.871894	0.689941
2513020848	830001	840000	0	0	0.178423	0.122777	0	0	0	0	0	0	0	0	0	0	0	0.190879	0	0	0.286875	0	0	0.13924	0.136894	0	0	0	0.105182	0.238011	0.388164	0.311015	0.81522	0.620897	0.275824	0.436639	0.366431	0.871894	0.689941
2513020848	835001	845000	0	0	0	0.122777	0.23374	0	0	0	0	0	0	0	0	0	0	0.190879	0	0	0.286875	0	0	0.13924	0.136894	0	0	0	0	0.237686	0.388431	0.310586	0.813226	0.623162	0.275824	0.436639	0.366431	0.871894	0.689941
2513020848	840001	850000	0	0	0	0	0.23374	0	0	0	0	0	0	0	0	0	0	0.190879	0	0	0.147364	0	0	0.13924	0.136894	0	0	0	0	0.237472	0.388562	0.310482	0.814499	0.62353	0.275824	0.436639	0.366431	0.871894	0.689941
2513020848	845001	855000	0	0	0	0	0.23374	0	0	0	0	0	0	0	0	0	0	0	0	0	0	0	0	0	0	0	0	0	0	0.235619	0.388488	0.307557	0.815671	0.622298	0.275824	0.436639	0.366431	0.871894	0.689941
2513020848	850001	860000	0	0	0	0	0	0	0	0	0	0	0	0	0	0	0	0	0	0	0	0	0	0	0	0	0	0	0	0.236051	0.388488	0.309227	0.816099	0.623295	0.275824	0.436639	0.366431	0.871894	0.689941
2513020848	855001	865000	0	0	0.194784	0.205504	0.191448	0	0	0	0	0	0	0	0	0	0	0	0	0	0.182825	0	0.183925	0.09665	0	0	0	0	0	0.236755	0.387386	0.308328	0.814023	0.62017	0.275824	0.436639	0.366431	0.871894	0.689941
2513020848	860001	870000	0.201802	0	0.194784	0.205504	0.191448	0	0	0	0	0.178275	0	0	0	0	0	0	0	0	0.182825	0.119693	0.183925	0.196796	0	0	0	0	0	0.235182	0.38655	0.307479	0.811892	0.61758	0.275824	0.436639	0.366431	0.871894	0.689941
2513020848	865001	875000	0.201802	0	0.194784	0.205504	0.191448	0	0	0	0	0.178275	0	0	0	0	0	0.121717	0	0	0.182825	0.119693	0.183925	0.196796	0	0	0	0	0	0.235592	0.387464	0.308038	0.811223	0.618382	0.275824	0.436639	0.366431	0.871894	0.689941
2513020848	870001	880000	0.536297	0	0	0	0	0	0	0	0	0.178275	0	0	0	0	0	0.121717	0	0	0	0.119693	0	0.100146	0	0	0	0	0	0.232644	0.387728	0.306632	0.809942	0.61644	0.275824	0.436639	0.366431	0.871894	0.689941
2513020848	875001	885000	0.334495	0	0	0	0	0	0	0	0	0	0	0	0	0	0	0.121717	0	0	0	0	0	0	0	0	0	0	0	0.233962	0.38869	0.307336	0.811803	0.618774	0.275824	0.436639	0.366431	0.871894	0.689941
2513020848	880001	890000	0.334495	0	0	0.544817	0	0	0	0	0	0	0	0	0	0	0	0	0	0	0.098992	0	0	0	0	0	0	0	0	0.23306	0.388315	0.303994	0.811188	0.615669	0.275824	0.436639	0.366431	0.871894	0.689941
2513020848	885001	895000	0	0	0.146099	0.544817	0	0	0	0	0	0	0	0	0	0	0	0	0	0	0.098992	0	0	0	0	0	0	0	0	0.235331	0.389076	0.305246	0.813258	0.618899	0.275824	0.436639	0.366431	0.871894	0.689941
2513020848	890001	900000	0	0	0.146099	0.544817	0	0.158511	0	0	0	0	0	0	0	0.253047	0	0	0	0	0.350741	0	0	0	0	0	0	0	0.156001	0.233743	0.387094	0.30744	0.813471	0.61918	0.275824	0.436639	0.366431	0.871894	0.689941
2513020848	895001	905000	0	0	0.146099	0.181974	0	0.158511	0	0	0	0	0	0	0	0.253047	0.134447	0	0	0	0.394359	0.104437	0	0.137092	0	0	0	0	0.156001	0.233372	0.384081	0.315458	0.813078	0.620564	0.275824	0.436639	0.366431	0.871894	0.689941
2513020848	900001	910000	0	0	0	0.181974	0	0.158511	0	0	0	0	0	0	0	0.253047	0.134447	0	0	0	0.394359	0.104437	0	0.137092	0	0	0	0	0.156001	0.233855	0.384878	0.315232	0.814447	0.622435	0.275824	0.436639	0.366431	0.871894	0.689941
2513020848	905001	915000	0	0	0	0.28935	0	0	0	0.171351	0	0	0	0.18613	0.173849	0	0.386027	0	0	0.24205	0.412412	0.329472	0	0.347338	0	0	0	0	0	0.233373	0.386465	0.315127	0.813546	0.631034	0.275824	0.436639	0.366431	0.871894	0.689941
2513020848	910001	920000	0	0	0	0.107376	0	0	0	0.171351	0	0	0	0.18613	0.173849	0	0.25158	0	0	0.24205	0.269802	0.225035	0	0.210246	0	0	0	0	0	0.234163	0.388111	0.310848	0.815273	0.630582	0.275824	0.436639	0.366431	0.871894	0.689941
2513020848	915001	925000	0	0	0	0.107376	0	0	0.196059	0.352188	0	0	0	0.18613	0.173849	0.169754	0.418087	0.172629	0	0.24205	0.44415	0.471203	0	0.388463	0	0	0	0	0	0.232356	0.382959	0.314603	0.810549	0.637701	0.275824	0.436639	0.366431	0.871894	0.689941
2513020848	920001	930000	0	0	0	0	0	0	0.196059	0.180837	0	0	0	0	0	0.169754	0.166507	0.172629	0	0	0.174348	0.246168	0	0.178217	0	0	0	0	0	0.234941	0.384084	0.312054	0.812199	0.62762	0.275824	0.436639	0.366431	0.871894	0.689941
2513020848	925001	935000	0	0	0	0	0	0	0.196059	0.180837	0	0	0	0	0	0.169754	0.166507	0.172629	0	0	0.174348	0.246168	0	0.178217	0	0	0	0	0	0.234767	0.383392	0.312733	0.811563	0.628459	0.275824	0.436639	0.366431	0.871894	0.689941
2513020848	930001	940000	0	0	0	0	0	0	0	0	0	0	0	0	0	0	0	0	0	0	0	0	0	0	0	0	0	0	0	0.236051	0.388488	0.309426	0.816077	0.623434	0.275824	0.436639	0.366431	0.871894	0.689941
2513020848	935001	945000	0	0	0	0	0	0	0	0	0	0	0	0	0	0	0	0	0	0	0	0	0	0	0	0	0	0	0	0.236051	0.388488	0.309489	0.81607	0.623477	0.275824	0.436639	0.366431	0.871894	0.689941
2513020848	940001	950000	0	0	0	0	0.177624	0	0	0	0	0	0	0	0	0	0	0	0	0	0	0	0	0	0	0	0	0	0	0.235702	0.388488	0.309526	0.816465	0.621835	0.275824	0.436639	0.366431	0.871894	0.689941
2513020848	945001	955000	0	0	0	0	0.177624	0	0	0	0	0	0	0	0	0	0	0	0	0	0	0	0	0	0	0	0	0	0	0.235771	0.388488	0.309466	0.816395	0.622126	0.275824	0.436639	0.366431	0.871894	0.689941
2513020848	950001	960000	0	0	0	0	0.177624	0	0	0	0	0	0	0	0	0	0	0	0	0	0	0	0	0	0	0	0	0	0	0.235808	0.388488	0.309435	0.816357	0.622279	0.275824	0.436639	0.366431	0.871894	0.689941
2513020848	955001	965000	0	0	0	0	0	0	0	0	0	0	0	0	0	0	0	0	0	0	0	0	0	0	0	0	0	0	0	0.236051	0.388488	0.309227	0.816099	0.623295	0.275824	0.436639	0.366431	0.871894	0.689941
2513020848	960001	970000	0	0	0	0	0	0	0	0	0	0	0	0	0	0	0	0.117047	0	0	0.168369	0	0	0	0	0	0	0	0	0.2366	0.389045	0.310596	0.814688	0.624426	0.275824	0.436639	0.366431	0.871894	0.689941
2513020848	965001	975000	0	0	0	0	0	0	0.284267	0	0	0.24915	0.269597	0	0	0	0.254104	0.117047	0.273571	0	0.417641	0.206081	0.211138	0.196328	0	0	0	0	0	0.237803	0.382396	0.312122	0.809585	0.628768	0.275824	0.436639	0.366431	0.871894	0.689941
2513020848	970001	980000	0.161022	0	0.154687	0	0	0	0.284267	0	0	0.24915	0.269597	0	0	0	0.254104	0.117047	0.273571	0.16166	0.417641	0.326186	0.211138	0.196328	0	0	0	0	0	0.233317	0.380644	0.311386	0.805379	0.625616	0.275824	0.436639	0.366431	0.871894	0.689941
2513020848	975001	985000	0.161022	0	0.154687	0	0	0	0.284267	0	0	0.24915	0.269597	0	0	0	0.254104	0	0.273571	0.16166	0.249272	0.326186	0.211138	0.196328	0	0	0	0	0	0.233465	0.38193	0.309738	0.809004	0.624143	0.275824	0.436639	0.366431	0.871894	0.689941
2513020848	980001	990000	0.161022	0	0.462804	0	0	0.318515	0	0	0	0	0	0	0	0	0	0	0	0.16166	0	0.120105	0	0	0	0	0	0	0	0.232797	0.386476	0.30515	0.811144	0.617275	0.275824	0.436639	0.366431	0.871894	0.689941
2513020848	985001	995000	0	0.124236	0.308117	0	0.37693	0.318515	0	0	0	0.334703	0	0	0	0	0	0	0	0	0	0	0	0	0	0	0	0	0	0.236968	0.388081	0.301334	0.811784	0.615428	0.275824	0.436639	0.366431	0.871894	0.689941
2513020848	990001	1000000	0	0.124236	0.308117	0	0.37693	0.318515	0	0	0	0.334703	0	0	0	0	0	0	0	0	0	0	0	0	0	0	0	0	0	0.237178	0.387991	0.299575	0.810808	0.613656	0.275824	0.436639	0.366431	0.871894	0.689941
2513020848	995001	1005000	0	0.124236	0	0	0.37693	0	0	0	0	0.45649	0	0	0	0	0	0	0	0	0	0	0	0	0	0	0	0	0	0.236594	0.389392	0.303033	0.812883	0.617327	0.275824	0.436639	0.366431	0.871894	0.689941
2513020848	1000001	1010000	0	0	0	0	0	0	0	0	0	0.121787	0	0	0	0	0.109419	0	0	0	0	0	0	0	0	0	0	0	0	0.236085	0.388073	0.308942	0.814773	0.623646	0.275824	0.436639	0.366431	0.871894	0.689941
2513020848	1005001	1015000	0.559151	0	0	0	0.423133	0	0	0	0	0.218363	0	0	0.0998926	0.208927	0.215657	0.321712	0.298321	0	0.197672	0.192404	0.540845	0	0	0.13267	0	0.404772	0.0982073	0.232437	0.387848	0.314704	0.810105	0.618319	0.275824	0.436639	0.366431	0.871894	0.689941
2513020848	1010001	1020000	0.559151	0	0	0	0.423133	0	0	0	0	0.0965758	0	0	0.0998926	0.208927	0.215657	0.321712	0.298321	0	0.334154	0.29616	0.540845	0	0	0.13267	0	0.404772	0.0982073	0.232577	0.387346	0.315102	0.811209	0.620155	0.275824	0.436639	0.366431	0.871894	0.689941
2513020848	1015001	1025000	0.559151	0	0	0	0.423133	0	0	0	0	0.0965758	0	0	0.0998926	0.208927	0.106238	0.321712	0.298321	0	0.334154	0.29616	0.540845	0	0	0.13267	0	0.503468	0.0982073	0.233052	0.38793	0.314396	0.813237	0.619398	0.275824	0.436639	0.366431	0.871894	0.689941
2513020848	1020001	1030000	0	0	0	0	0	0	0	0	0	0	0	0	0	0	0	0	0	0	0.136482	0.103755	0	0	0	0	0	0.0986951	0	0.235662	0.388139	0.310211	0.816367	0.623142	0.275824	0.436639	0.366431	0.871894	0.689941
2513020848	1025001	1035000	0	0	0	0	0	0	0	0	0	0	0	0	0	0	0.117198	0	0	0	0	0	0	0	0	0	0	0.0986951	0	0.235965	0.388044	0.309909	0.816098	0.623326	0.275824	0.436639	0.366431	0.871894	0.689941
2513020848	1030001	1040000	0	0	0.0964024	0	0.102534	0	0	0	0	0	0	0	0	0	0.117198	0	0	0	0	0	0	0	0	0	0	0	0	0.235815	0.387968	0.308624	0.814691	0.622834	0.275824	0.436639	0.366431	0.871894	0.689941
2513020848	1035001	1045000	0	0	0.0964024	0	0.102534	0	0	0	0	0	0	0	0	0	0.117198	0	0	0.233259	0.0972558	0	0	0	0	0	0	0	0	0.231568	0.386257	0.310281	0.81188	0.623983	0.275824	0.436639	0.366431	0.871894	0.689941
2513020848	1040001	1050000	0	0	0.0964024	0	0.102534	0	0	0	0	0	0	0	0	0	0	0	0	0.233259	0.0972558	0	0	0	0	0	0	0	0	0.223084	0.384409	0.310228	0.807421	0.622164	0.275824	0.436639	0.366431	0.871894	0.689941
2513020848	1045001	1055000	2.66662	6.37165	6.21976	9.12359	6.57145	4.67299	6.01621	6.11458	2.90341	0.849557	1.19513	0.729487	1.25167	2.52532	1.69131	1.84029	1.47684	1.13238	1.20231	1.27373	2.26391	2.82746	1.262	1.65262	0.406922	0.786766	0.822366	0.564385	0.0886088	0.000342618	0.0444176	0.0284906	0.588665	0.436639	0.0407031	0.871894	0.689941
2513020848	1050001	1060000	2.66662	6.37165	6.21976	9.33585	6.57145	4.83831	6.01621	6.11458	2.90341	0.849557	1.19513	0.729487	1.25167	2.52532	1.69131	1.84029	1.47684	0.899121	1.10506	1.27373	2.26391	2.82746	1.262	1.65262	0.406922	0.786766	0.822366	0.418636	0.133695	0.00423134	0.174843	0.0990856	0.446846	0.436639	0.251342	0.871894	0.689941
2513020848	1055001	1065000	2.66662	6.37165	6.21976	9.33585	6.57145	4.83831	6.01621	6.11458	2.90341	0.849557	1.19513	0.729487	1.25167	2.52532	1.69131	1.84029	1.47684	0.899121	1.10506	1.27373	2.26391	2.82746	1.262	1.65262	0.406922	0.786766	0.822366	0.309392	0.211439	0.0404011	0.445407	0.277428	0.335669	0.436639	0.366431	0.871894	0.689941
2513020848	1060001	1070000	0	0	0	0.212258	0	0.165324	0	0	0	0	0	0	0	0	0	0	0	0	0	0	0	0	0.157783	0	0	0	0	0.236878	0.387816	0.307665	0.815746	0.621502	0.275824	0.436639	0.366431	0.871894	0.689941
2513020848	1065001	1075000	0	0	0	0	0	0	0	0	0	0	0	0	0	0	0	0	0	0	0	0	0	0	0.157783	0	0	0	0	0.236637	0.388148	0.309814	0.816421	0.623083	0.275824	0.436639	0.366431	0.871894	0.689941
2513020848	1070001	1080000	0	0	0	0	0	0	0	0	0	0	0	0	0	0	0	0	0	0	0	0	0	0.101053	0.157783	0	0	0	0	0.236874	0.38778	0.310127	0.816486	0.623049	0.275824	0.436639	0.366431	0.871894	0.689941
2513020848	1075001	1085000	0	0	0	0	0	0	0	0	0	0	0	0	0	0	0	0	0	0	0	0	0	0.101053	0	0	0	0	0	0.236443	0.387933	0.309726	0.816222	0.623228	0.275824	0.436639	0.366431	0.871894	0.689941
2513020848	1080001	1090000	0	0	0	0	0	0	0	0	0	0	0	0	0	0	0	0	0	0	0	0	0	0.101053	0	0	0	0	0	0.236511	0.387837	0.309813	0.816244	0.623217	0.275824	0.436639	0.366431	0.871894	0.689941
2513020848	1085001	1095000	0	0	0	0	0	0	0	0	0	0	0	0	0	0	0	0	0	0	0	0	0	0	0	0	0	0	0	0.236051	0.388488	0.309227	0.816099	0.623295	0.275824	0.436639	0.366431	0.871894	0.689941
2513020848	1090001	1100000	0	0	0	0	0	0	0	0	0	0	0	0	0	0	0	0	0	0	0	0	0	0	0	0	0	0	0	0.236051	0.388488	0.309227	0.816099	0.623295	0.275824	0.436639	0.366431	0.871894	0.689941
2513020848	1095001	1105000	0	0	0	0	0	0	0	0	0	0	0	0	0	0	0	0	0	0	0	0	0	0	0	0	0	0	0	0.236051	0.388488	0.309227	0.816099	0.623295	0.275824	0.436639	0.366431	0.871894	0.689941
2513020848	1100001	1110000	0.482256	0.486975	0.493611	0.500101	0.48048	0.471926	0.478679	0	0.471041	0	0	0	0	0	0	0	0	0	0	0	0	0	0	0	0	0	0	0.234708	0.383539	0.28387	0.804675	0.601157	0.275824	0.436639	0.366431	0.871894	0.689941
2513020848	1105001	1115000	0.482256	0.486975	0.493611	0.500101	0.48048	0.471926	0.478679	0	0.471041	0	0	0	0	0	0	0	0	0	0	0	0	0	0	0	0	0	0	0.234514	0.382802	0.280158	0.802909	0.597791	0.275824	0.436639	0.366431	0.871894	0.689941
2513020848	1110001	1120000	0.482256	0.486975	0.493611	0.500101	0.48048	0.471926	0.478679	0	0.471041	0	0	0	0	0	0	0	0	0	0	0	0	0	0	0	0	0	0	0.234533	0.382877	0.280531	0.803086	0.598129	0.275824	0.436639	0.366431	0.871894	0.689941
2513020848	1115001	1125000	0	0	0	0	0.170002	0	0	0	0	0	0	0	0	0	0	0.105842	0	0	0	0.112175	0	0	0	0	0	0	0	0.235292	0.389109	0.30914	0.814727	0.623429	0.275824	0.436639	0.366431	0.871894	0.689941
2513020848	1120001	1130000	0	0	0	0	0.170002	0	0	0	0	0	0	0	0	0	0	0.105842	0	0	0	0.112175	0	0	0	0	0	0	0	0.234805	0.38951	0.309086	0.813842	0.623518	0.275824	0.436639	0.366431	0.871894	0.689941
2513020848	1125001	1135000	0	0	0	0	0.170002	0	0	0	0	0	0	0	0	0	0	0.105842	0	0	0	0.112175	0	0	0	0	0	0	0	0.234089	0.390116	0.309772	0.813631	0.623621	0.275824	0.436639	0.366431	0.871894	0.689941
2513020848	1130001	1140000	0	0	0	0	0	0	0	0	0	0	0	0	0	0	0	0	0	0	0	0	0	0	0	0	0	0	0	0.236051	0.388488	0.309668	0.816761	0.623273	0.275824	0.436639	0.366431	0.871894	0.689941
2513020848	1135001	1145000	0	0	0	0	0	0.18439	0	0	0	0	0	0	0	0	0	0.163679	0.159154	0.145258	0	0.196802	0.1853	0.145118	0.158966	0	0	0	0.147421	0.236586	0.386367	0.314246	0.816872	0.623147	0.275824	0.436639	0.366431	0.871894	0.689941
2513020848	1140001	1150000	0	0	0	0	0	0.18439	0	0	0	0	0	0	0	0	0	0.163679	0.159154	0.145258	0	0.196802	0.1853	0.145118	0.158966	0	0	0	0.147421	0.236485	0.386761	0.313111	0.816446	0.623186	0.275824	0.436639	0.366431	0.871894	0.689941
2513020848	1145001	1155000	0	0	0	0	0	0.18439	0	0	0	0	0	0	0	0	0	0.163679	0.159154	0.145258	0	0.196802	0.1853	0.246567	0.158966	0	0	0	0.147421	0.236883	0.386009	0.314204	0.816602	0.623112	0.275824	0.436639	0.366431	0.871894	0.689941
2513020848	1150001	1160000	0	0	0	0	0	0	0	0	0	0	0	0	0	0	0	0	0	0	0	0	0	0.101449	0	0	0	0	0	0.23641	0.387979	0.309684	0.816212	0.623234	0.275824	0.436639	0.366431	0.871894	0.689941
2513020848	1155001	1165000	0	0	0	0	0	0	0	0	0	0	0	0	0	0	0	0	0	0	0	0	0	0.101449	0	0	0	0	0	0.236462	0.387906	0.30975	0.816229	0.623225	0.275824	0.436639	0.366431	0.871894	0.689941
2513020848	1160001	1170000	0	0	0	0	0	0	0	0	0	0	0	0	0	0	0	0	0	0	0	0.110434	0	0	0	0	0	0	0	0.235271	0.388215	0.309752	0.815912	0.623463	0.275824	0.436639	0.366431	0.871894	0.689941
2513020848	1165001	1175000	0	0	0	0.0953523	0.132124	0	0	0	0	0	0	0	0	0	0	0	0.121054	0	0	0.249957	0	0.106681	0.103555	0	0	0	0	0.234933	0.387003	0.312808	0.814906	0.622719	0.275824	0.436639	0.366431	0.871894	0.689941
2513020848	1170001	1180000	0	0	0	0.0953523	0.132124	0	0	0	0	0	0	0	0	0	0	0	0.121054	0	0	0.249957	0	0.106681	0.103555	0	0	0	0	0.235009	0.387103	0.312564	0.814988	0.622758	0.275824	0.436639	0.366431	0.871894	0.689941
2513020848	1175001	1185000	0.210243	0	0	0.0953523	0.132124	0	0	0	0	0	0	0	0	0	0	0	0.121054	0	0	0.139523	0	0.299659	0.103555	0	0	0	0	0.234959	0.385676	0.311785	0.813258	0.619198	0.275824	0.436639	0.366431	0.871894	0.689941
2513020848	1180001	1190000	0.210243	0	0	0	0	0	0	0	0	0	0	0	0	0	0	0	0	0	0	0	0	0.192977	0	0	0	0	0	0.23515	0.386736	0.308851	0.814106	0.619763	0.275824	0.436639	0.366431	0.871894	0.689941
2513020848	1185001	1195000	0.210243	0	0	0	0	0	0	0	0	0	0	0	0	0.123255	0	0.107839	0	0.109793	0	0	0	0.192977	0	0	0	0	0	0.233224	0.387334	0.310336	0.812408	0.62241	0.275824	0.436639	0.366431	0.871894	0.689941
2513020848	1190001	1200000	0	0	0	0	0	0	0	0	0	0	0	0	0	0.123255	0	0.107839	0	0.109793	0	0	0	0	0	0	0	0	0	0.233531	0.388657	0.311184	0.813482	0.625542	0.275824	0.436639	0.366431	0.871894	0.689941
2513020848	1195001	1205000	0	0	0	0.312586	0	0	0	0	0	0	0	0	0	0.123255	0	0.107839	0	0.109793	0.231423	0	0	0.307583	0	0.13484	0	0	0	0.234025	0.38788	0.316185	0.812378	0.622839	0.275824	0.436639	0.366431	0.871894	0.689941
2513020848	1200001	1210000	0	0	0	0.312586	0	0	0	0	0	0	0	0	0	0	0	0	0	0	0.331985	0.114073	0	0.307583	0	0.13484	0	0	0	0.235592	0.386366	0.320005	0.8132	0.619938	0.275824	0.436639	0.366431	0.871894	0.689941
2513020848	1205001	1215000	0	0	0	0.312586	0	0	0	0	0	0	0	0	0	0	0	0	0	0	0.331985	0.114073	0	0.307583	0	0.13484	0	0	0	0.235682	0.386797	0.317317	0.813823	0.62032	0.275824	0.436639	0.366431	0.871894	0.689941
2513020848	1210001	1220000	0	0	0	0.202138	0	0	0	0	0	0	0	0	0	0	0.1544	0	0	0	0.100562	0.114073	0	0	0	0	0	0	0	0.234459	0.387057	0.309769	0.812765	0.623661	0.275824	0.436639	0.366431	0.871894	0.689941
2513020848	1215001	1225000	0	0	0	0.202138	0	0	0	0	0	0	0	0	0	0	0.1544	0	0	0	0	0	0	0	0	0	0	0	0	0.235561	0.387899	0.308596	0.814022	0.623129	0.275824	0.436639	0.366431	0.871894	0.689941
2513020848	1220001	1230000	0	0	0	0.303802	0	0	0	0	0	0	0	0	0	0	0.1544	0	0	0	0	0	0	0	0	0	0	0	0	0.235413	0.388068	0.30792	0.813728	0.622504	0.275824	0.436639	0.366431	0.871894	0.689941
2513020848	1225001	1235000	0	0	0	0.101664	0	0	0	0	0	0	0	0	0	0	0	0	0	0	0	0	0	0	0	0	0	0	0	0.235899	0.388641	0.308561	0.81578	0.622687	0.275824	0.436639	0.366431	0.871894	0.689941
2513020848	1230001	1240000	0	0	0	0.101664	0	0	0	0	0	0	0	0	0	0	0	0	0	0	0.173296	0.151107	0	0	0	0	0	0	0	0.234985	0.387887	0.310338	0.81498	0.623544	0.275824	0.436639	0.366431	0.871894	0.689941
2513020848	1235001	1245000	0	0	0	0	0	0	0	0	0	0	0	0	0	0	0	0	0	0	0.173296	0.151107	0	0	0	0	0	0	0	0.235126	0.38773	0.311016	0.815288	0.624153	0.275824	0.436639	0.366431	0.871894	0.689941
2513020848	1240001	1250000	0	0	0	0	0	0	0	0	0	0	0	0	0	0	0	0	0	0	0.173296	0.151107	0	0	0	0	0	0	0	0.235186	0.387779	0.3109	0.81534	0.624097	0.275824	0.436639	0.366431	0.871894	0.689941
2513020848	1245001	1255000	0.205092	0	0.22615	0.395142	0	0.359264	0	0	0	0	0	0	0	0.499295	0	0	0.218193	0.32396	0.488349	0.137109	0.483844	0.108292	0.546688	0	0	0.494363	0.113308	0.230071	0.379851	0.318761	0.812451	0.616808	0.275824	0.436639	0.366431	0.871894	0.689941
2513020848	1250001	1260000	0.205092	0	0.22615	0.395142	0	0.359264	0	0	0	0	0	0	0	0.499295	0	0	0.218193	0.32396	0.585347	0.137109	0.483844	0.108292	0.546688	0	0	0.494363	0.113308	0.230105	0.379575	0.319302	0.812111	0.617024	0.275824	0.436639	0.366431	0.871894	0.689941
2513020848	1255001	1265000	0.205092	0	0.22615	0.395142	0	0.359264	0	0	0	0	0	0	0	0.499295	0	0	0.218193	0.32396	0.585347	0.137109	0.483844	0.108292	0.546688	0	0	0.494363	0.113308	0.229482	0.378636	0.320395	0.811673	0.616362	0.275824	0.436639	0.366431	0.871894	0.689941
2513020848	1260001	1270000	0	0	0	0	0	0	0	0	0	0	0	0	0	0	0	0	0	0	0.0969987	0	0	0	0.133374	0	0	0	0	0.236625	0.388005	0.311302	0.816333	0.622739	0.275824	0.436639	0.366431	0.871894	0.689941
2513020848	1265001	1275000	0	0	0	0	0	0	0	0	0	0	0	0	0	0	0	0	0	0	0	0	0	0	0.133374	0	0	0	0	0.236644	0.388144	0.311175	0.816653	0.62242	0.275824	0.436639	0.366431	0.871894	0.689941
2513020848	1270001	1280000	0	0	0	0	0	0	0	0	0	0	0	0	0	0	0	0	0	0	0	0	0	0	0.133374	0	0	0	0	0.236638	0.388147	0.311155	0.816648	0.622429	0.275824	0.436639	0.366431	0.871894	0.689941
2513020848	1275001	1285000	0	0	0	0.817164	0	0	0	0	0	0	0	0	0	0	0	0	0	0	0	0.261052	0	0	0	0	0	0	0	0.230871	0.389591	0.303125	0.812298	0.615508	0.275824	0.436639	0.366431	0.871894	0.689941
2513020848	1280001	1290000	2.16124	1.53549	1.38064	2.61396	2.16659	1.54233	1.97543	2.50992	1.22805	2.9307	3.78519	4.23231	3.88462	1.68882	2.91571	3.41374	2.60173	3.70225	1.46989	2.07728	4.95214	2.33131	1.99606	2.71793	2.49771	2.81747	2.83966	0.253003	0.473917	0.325667	0.872624	0.71992	0.281431	0.500949	0.366431	0.894462	0.75155
2513020848	1285001	1295000	2.16124	1.53549	1.38064	2.61396	2.27168	1.54233	1.97543	2.50992	1.22805	2.9307	3.78519	4.23231	3.88462	1.68882	2.91571	3.41374	2.60173	3.82073	1.46989	2.07728	4.95214	2.33131	1.99606	2.71793	2.49771	2.81747	2.83966	0.253456	0.490063	0.32889	0.882753	0.736532	0.28167	0.517555	0.366431	0.902181	0.7662
2513020848	1290001	1300000	2.16124	1.53549	1.38064	1.79679	2.27168	1.54233	1.97543	2.50992	1.22805	2.9307	3.78519	4.23231	3.88462	1.68882	2.91571	3.41374	2.60173	3.82073	1.46989	1.81623	4.95214	2.33131	1.99606	2.71793	2.49771	2.81747	2.83966	0.251855	0.459255	0.327277	0.867343	0.712979	0.281431	0.486318	0.366431	0.892124	0.745616
2513020848	1295001	1305000	0	0	0	0	0.105092	0	0	0	0	0	0	0	0	0.141321	0	0	0	0.118474	0	0	0	0.146742	0	0	0	0	0	0.232553	0.386599	0.310748	0.81497	0.625309	0.275824	0.436639	0.366431	0.871894	0.689941
2513020848	1300001	1310000	0.135254	0	0	0	0	0	0	0	0	0	0	0	0	0.141321	0	0.196357	0	0	0.175536	0.16422	0	0.286622	0	0	0	0	0	0.234021	0.386905	0.315737	0.811744	0.62359	0.275824	0.436639	0.366431	0.871894	0.689941
2513020848	1305001	1315000	0.135254	0	0	0	0	0	0	0	0	0	0	0	0	0.141321	0	0.196357	0	0	0.175536	0.16422	0	0.392118	0	0	0	0	0	0.23462	0.386529	0.316537	0.812483	0.622995	0.275824	0.436639	0.366431	0.871894	0.689941
2513020848	1310001	1320000	0.135254	0	0	0	0	0	0	0	0	0	0	0	0	0	0	0.295343	0	0	0.175536	0.16422	0	0.245376	0	0	0	0	0	0.236033	0.388434	0.315363	0.813162	0.622586	0.275824	0.436639	0.366431	0.871894	0.689941
2513020848	1315001	1325000	0	0	0	0.429595	0	0	0	0	0	0	0	0	0	0.0981041	0	0.0989861	0	0	0	0	0	0.105496	0	0	0	0	0	0.234978	0.389154	0.308437	0.813557	0.621751	0.275824	0.436639	0.366431	0.871894	0.689941
2513020848	1320001	1330000	0	0	0	0.429595	0	0	0	0	0	0	0	0	0	0.0981041	0.104265	0.0989861	0	0	0	0	0.212322	0.122289	0.100104	0	0	0.102832	0	0.236516	0.387407	0.309734	0.813932	0.622297	0.275824	0.436639	0.366431	0.871894	0.689941
2513020848	1325001	1335000	0	0	0	0.429595	0	0	0	0	0	0	0	0	0	0.0981041	0.104265	0	0	0	0	0	0.212322	0.122289	0.100104	0	0	0.102832	0	0.236113	0.386059	0.309182	0.814513	0.621277	0.275824	0.436639	0.366431	0.871894	0.689941
2513020848	1330001	1340000	0	0.167724	0	0	0	0	0	0	0	0	0	0.136533	0	0	0.104265	0	0	0	0.130938	0	0.212322	0.122289	0.100104	0	0	0.102832	0	0.239079	0.388678	0.310728	0.81596	0.62297	0.275824	0.436639	0.366431	0.871894	0.689941
2513020848	1335001	1345000	0	0.167724	0	0	0	0	0	0	0	0	0	0.136533	0	0.162491	0	0	0	0.125323	0.227249	0	0	0	0	0	0	0	0	0.233186	0.389807	0.310013	0.812693	0.62505	0.275824	0.436639	0.366431	0.871894	0.689941
2513020848	1340001	1350000	0	0.167724	0.11555	0	0.154878	0	0	0	0	0	0	0.136533	0	0.162491	0	0	0	0.354156	0.227249	0	0	0	0	0	0	0.112493	0	0.231661	0.388809	0.309975	0.813716	0.623128	0.275824	0.436639	0.366431	0.871894	0.689941
2513020848	1345001	1355000	0	0	0.11555	0	0.154878	0	0	0	0	0.132453	0	0	0	0.162491	0	0	0	0.354156	0.229329	0	0	0	0	0	0	0.112493	0	0.231013	0.38701	0.310595	0.813843	0.623854	0.275824	0.436639	0.366431	0.871894	0.689941
2513020848	1350001	1360000	0	0	0.11555	0.103208	0.154878	0	0	0	0	0.132453	0	0	0	0	0	0	0	0.228833	0.133019	0	0	0	0	0	0	0.112493	0	0.232984	0.387824	0.308288	0.81502	0.621519	0.275824	0.436639	0.366431	0.871894	0.689941
2513020848	1355001	1365000	0	0	0	0.267262	0.272992	0	0	0	0	0.132453	0.187915	0	0.192518	0	0.177221	0	0.171865	0.155482	0.292631	0.134317	0	0	0.169336	0	0	0	0.104823	0.233612	0.386885	0.307582	0.814732	0.631593	0.275824	0.436639	0.366431	0.871894	0.689941
2513020848	1360001	1370000	0	0	0	0.267262	0.272992	0	0	0	0	0	0.187915	0	0.309064	0	0.177221	0	0.171865	0.155482	0.261061	0.241773	0	0	0.169336	0	0	0	0.104823	0.229975	0.389861	0.308139	0.821123	0.65124	0.275824	0.436639	0.366431	0.871894	0.695493
2513020848	1365001	1375000	0	0	0	0.164054	0.272992	0	0	0	0	0	0.187915	0	0.309064	0	0.177221	0	0.171865	0.155482	0.261061	0.241773	0	0	0.169336	0	0	0	0.104823	0.233363	0.388828	0.309859	0.819044	0.637733	0.275824	0.436639	0.366431	0.871894	0.689941
2513020848	1370001	1380000	0	0	0	0	0	0	0	0	0	0	0	0	0.116545	0	0	0	0	0	0.101449	0.107456	0	0	0	0	0	0	0	0.235982	0.390677	0.309201	0.818639	0.629777	0.275824	0.436639	0.366431	0.871894	0.689941
2513020848	1375001	1385000	0	0	0	0	0	0	0	0	0	0	0	0	0	0	0	0	0	0	0	0	0	0	0	0	0	0	0	0.236051	0.388488	0.309227	0.816099	0.623295	0.275824	0.436639	0.366431	0.871894	0.689941
2513020848	1380001	1390000	0	0	0	0	0	0.121522	0	0	0.117061	0	0	0	0	0	0	0	0	0	0	0	0	0	0	0	0	0	0	0.236359	0.387774	0.307694	0.817292	0.623699	0.275824	0.436639	0.366431	0.871894	0.689941
2513020848	1385001	1395000	0	0	0	0	0.1494	0.121522	0	0	0.117061	0	0	0	0	0	0	0	0	0.19411	0	0.175965	0	0.184623	0.0957396	0	0	0	0.117804	0.234024	0.385669	0.311969	0.81809	0.622124	0.275824	0.436639	0.366431	0.871894	0.689941
2513020848	1390001	1400000	0	0	0	0	0.1494	0.121522	0	0	0.117061	0	0	0	0	0	0	0	0	0.19411	0	0.175965	0	0.184623	0.0957396	0	0	0	0.117804	0.234172	0.385875	0.311767	0.817945	0.62221	0.275824	0.436639	0.366431	0.871894	0.689941
2513020848	1395001	1405000	0	0	0	0	0.1494	0	0	0	0	0	0	0	0	0	0	0	0	0.19411	0	0.303704	0	0.184623	0.0957396	0	0	0	0.117804	0.233034	0.385877	0.313564	0.817097	0.622019	0.275824	0.436639	0.366431	0.871894	0.689941
2513020848	1400001	1410000	0	0	0	0	0	0	0	0	0	0	0	0	0	0	0	0	0	0	0	0.127738	0	0	0	0	0	0	0	0.234751	0.388033	0.310104	0.815787	0.623577	0.275824	0.436639	0.366431	0.871894	0.689941
2513020848	1405001	1415000	0	0.125944	0	0.160294	0.125753	0.180461	0.121753	0.110739	0.129226	0	0	0	0.144236	0.132201	0.150173	0.149443	0.208454	0.64932	0.605047	0.494461	0.169606	0.219164	0.289774	0	0	0	0.114597	0.209176	0.358149	0.340207	0.793792	0.65588	0.275824	0.436639	0.372753	0.871894	0.696266
2513020848	1410001	1420000	0	0.125944	0	0.160294	0.125753	0.180461	0.121753	0.110739	0.129226	0	0	0	0.144236	0.132201	0.150173	0.149443	0.208454	0.64932	0.605047	0.490846	0.169606	0.317167	0.289774	0	0	0	0.114597	0.170327	0.302875	0.410694	0.732786	0.716018	0.275824	0.436639	0.43254	0.871894	0.748135
2513020848	1415001	1425000	0	0.125944	0	0.160294	0.282451	0.321261	0.121753	0.110739	0.129226	0	0	0.142621	0.279885	0.294849	0.150173	0.149443	0.349974	0.767558	0.731383	0.63452	0.169606	0.478577	0.412808	0.152356	0	0.132435	0.114597	0.211169	0.372488	0.342056	0.803149	0.661103	0.275824	0.436639	0.373839	0.871894	0.698628
2513020848	1420001	1430000	0	0	0	0	0.156698	0.1408	0	0	0	0	0	0.142621	0.135649	0.162648	0	0	0.14152	0.118238	0.126336	0.267797	0	0.259413	0.123034	0.152356	0	0.132435	0	0.232609	0.390472	0.314221	0.816913	0.629599	0.275824	0.436639	0.366431	0.871894	0.689941
2513020848	1425001	1435000	0	0	0	0	0.156698	0.1408	0	0	0	0	0	0.142621	0.135649	0.162648	0	0	0.14152	0.118238	0.126336	0.143674	0	0.280929	0.123034	0.152356	0	0.132435	0	0.234284	0.390111	0.312511	0.816902	0.627793	0.275824	0.436639	0.366431	0.871894	0.689941
2513020848	1430001	1440000	0	0	0	0	0	0	0	0	0	0	0	0	0	0	0	0	0	0	0	0	0	0.11952	0	0	0	0	0	0.23641	0.387979	0.309684	0.816212	0.623234	0.275824	0.436639	0.366431	0.871894	0.689941
2513020848	1435001	1445000	0	0	0	0	0	0	0	0	0	0	0	0	0	0	0	0	0	0	0	0	0	0.11952	0	0	0	0	0	0.236596	0.387717	0.309921	0.81627	0.623202	0.275824	0.436639	0.366431	0.871894	0.689941
2513020848	1440001	1450000	0	0	0	0	0	0	0	0	0	0	0	0	0	0	0.118077	0	0	0.117029	0.0990602	0	0	0.0979402	0	0	0	0	0	0.234829	0.386759	0.312776	0.814677	0.623894	0.275824	0.436639	0.366431	0.871894	0.689941
2513020848	1445001	1455000	0	0	0.160555	0	0	0	0.163182	0	0	0	0	0	0	0.152035	0.118077	0	0	0.117029	0.234706	0.146826	0	0.234836	0.117888	0	0	0	0	0.233351	0.383735	0.314168	0.811954	0.623821	0.275824	0.436639	0.366431	0.871894	0.689941
2513020848	1450001	1460000	0	0	0.160555	0	0.127508	0	0.163182	0	0	0	0	0	0	0.152035	0.118077	0.103558	0	0.117029	0.342579	0.345445	0	0.234836	0.117888	0	0	0	0	0.233256	0.385127	0.3136	0.811887	0.624179	0.275824	0.436639	0.366431	0.871894	0.689941
2513020848	1455001	1465000	0	0	0.160555	0	0.127508	0	0.163182	0	0	0	0	0	0	0.351964	0	0.279343	0	0.185142	0.390732	0.495183	0	0.310306	0.117888	0	0	0	0	0.231584	0.385844	0.31379	0.810375	0.626086	0.275824	0.436639	0.366431	0.871894	0.689941
2513020848	1460001	1470000	0	0.126696	0.120864	0	0.127508	0	0	0	0	0.164651	0	0.171155	0	0.199929	0	0.279343	0	0.364365	0.439548	0.348356	0.198397	0.345345	0	0	0	0	0	0.231981	0.388299	0.313623	0.809479	0.62634	0.275824	0.436639	0.366431	0.871894	0.689941
2513020848	1465001	1475000	0.28029	0.126696	0.37893	1.2756	0	0.305817	0.333175	0.170667	0	0.164651	0	0.171155	0.154478	0.481323	0.288778	0.518751	0.314528	0.515622	0.443104	0.251708	0.337498	0.477874	0.165751	0.204634	0.23789	0.157567	0.120944	0.229251	0.387929	0.311152	0.798477	0.620872	0.275824	0.436639	0.366431	0.871894	0.689941
2513020848	1470001	1480000	2.21701	2.07653	2.88062	3.0385	2.4679	2.41739	2.30876	1.98481	1.86033	1.91353	2.04132	2.23206	1.72768	2.19008	2.24558	2.39695	2.20754	2.04763	2.10019	2.49712	2.45364	2.39238	2.0615	3.38428	0.965849	4.76392	4.34284	0.217033	0.345745	0.410018	0.954448	0.339673	0.275824	0.436639	0.432211	0.959293	0.689941
2513020848	1475001	1485000	2.56479	1.94983	2.75975	3.0385	2.4679	2.41739	2.30876	2.56633	1.95753	1.74888	2.16666	2.06091	1.72768	2.55017	2.75255	2.9189	2.99179	1.86841	2.41325	2.95419	2.80724	2.65843	2.39085	3.53094	0.965849	5.2651	4.43834	0.229357	0.337676	0.392387	0.891697	0.494876	0.275824	0.436639	0.416955	0.907743	0.689941
2513020848	1480001	1490000	2.2845	2.07396	2.50169	1.86014	2.4679	2.11157	1.97558	2.39566	1.95753	1.74888	2.16666	2.06091	1.5732	2.26877	2.46378	2.57593	2.67727	1.82538	2.30182	2.85222	2.66813	2.5259	2.2251	3.3263	0.727959	5.10754	4.31739	0.233648	0.363157	0.349025	0.861582	0.565389	0.275824	0.436639	0.379676	0.887736	0.689941
2513020848	1485001	1495000	0.347773	0.12413	0	0.0972479	0	0	0	0.581516	0.0972049	0	0.12534	0	0	0.360083	0.506978	0.521953	0.784259	0.108236	0.497519	0.457067	0.551993	0.437987	0.329346	0.146661	0	0.501181	0.0954958	0.236516	0.379032	0.32024	0.808502	0.627253	0.275824	0.436639	0.366431	0.871894	0.689941
2513020848	1490001	1500000	0	0.12413	0	0.0972479	0	0	0	0	0	0	0	0	0	0	0	0	0	0.108236	0	0	0	0	0	0	0	0	0	0.235348	0.388333	0.308729	0.815184	0.622171	0.275824	0.436639	0.366431	0.871894	0.689941
2513020848	1495001	1505000	0	0	0	0	0	0	0	0	0	0	0	0	0	0	0	0	0	0	0	0	0	0	0	0	0	0	0	0.236051	0.388488	0.309408	0.816373	0.623286	0.275824	0.436639	0.366431	0.871894	0.689941
2513020848	1500001	1510000	0	0	0	0.0954457	0	0	0	0	0	0	0	0	0	0	0	0	0	0	0	0	0	0.107878	0	0	0	0	0	0.23639	0.387929	0.309419	0.81639	0.622425	0.275824	0.436639	0.366431	0.871894	0.689941
2513020848	1505001	1515000	0	0	0.141337	0.0954457	0	0	0	0	0	0	0	0	0	0.122829	0	0	0	0	0.286434	0.113088	0.131164	0.107878	0	0	0	0	0	0.234719	0.386065	0.31193	0.812496	0.623093	0.275824	0.436639	0.366431	0.871894	0.689941
2513020848	1510001	1520000	0	0	0.141337	0.0954457	0	0	0	0	0	0	0	0	0	0.122829	0	0	0	0	0.286434	0.113088	0.131164	0.107878	0	0	0	0	0	0.2349	0.386395	0.311558	0.812993	0.62312	0.275824	0.436639	0.366431	0.871894	0.689941
2513020848	1515001	1525000	0	0	0.141337	0	0	0	0	0	0	0	0	0	0	0.122829	0	0	0	0	0.286434	0.113088	0.131164	0	0	0	0	0	0	0.234928	0.387168	0.311177	0.813437	0.623844	0.275824	0.436639	0.366431	0.871894	0.689941
2513020848	1520001	1530000	0	0	0	0.566903	0	0	0	0	0	0	0	0	0	0	0	0	0	0	0	0	0	0	0	0	0	0	0	0.235398	0.389155	0.306555	0.8147	0.620806	0.275824	0.436639	0.366431	0.871894	0.689941
2513020848	1525001	1535000	0	0	0	0.566903	0	0	0	0	0	0	0.19312	0	0	0	0	0	0	0	0.119207	0	0	0	0	0	0	0	0.109334	0.235406	0.387701	0.305444	0.816482	0.619083	0.275824	0.436639	0.366431	0.871894	0.689941
2513020848	1530001	1540000	0	0	0.101777	0.566903	0.107216	0	0	0	0	0	0.19312	0	0	0	0	0	0	0	0.247084	0.115681	0	0.108997	0	0	0	0	0.109334	0.23472	0.386217	0.304934	0.815051	0.617036	0.275824	0.436639	0.366431	0.871894	0.689941
2513020848	1535001	1545000	0	0	0.101777	0	0.107216	0	0	0	0	0	0.19312	0	0	0	0	0	0	0	0.247084	0.115681	0	0.108997	0	0	0	0	0.109334	0.235673	0.384512	0.309437	0.817419	0.620682	0.275824	0.436639	0.366431	0.871894	0.689941
2513020848	1540001	1550000	0	0	0.101777	0	0.383278	0	0	0	0	0	0	0	0	0	0	0	0	0	0.127877	0.115681	0	0.108997	0	0	0	0	0	0.234478	0.386599	0.307049	0.813683	0.619828	0.275824	0.436639	0.366431	0.871894	0.689941
2513020848	1545001	1555000	0	0	0	0	0.276062	0	0	0	0	0	0	0	0	0	0	0	0	0	0.170143	0	0	0	0	0	0	0	0	0.235481	0.387839	0.307887	0.814916	0.622225	0.275824	0.436639	0.366431	0.871894	0.689941
2513020848	1550001	1560000	0	0	0	0	0.276062	0	0	0	0	0	0	0	0	0	0	0	0	0.0960354	0.170143	0.0994322	0	0	0	0	0	0.101454	0	0.229983	0.385985	0.310814	0.815446	0.620908	0.275824	0.436639	0.366431	0.871894	0.689941
2513020848	1555001	1565000	0.247018	0.280614	0.236605	0	0.403007	0	0.208596	0	0.233272	0	0	0	0.220929	0.133846	0	0.159947	0	0.26293	0.49894	0.377053	0.196414	0.180771	0.136383	0	0	0.101454	0	0.230521	0.384986	0.308638	0.80838	0.622178	0.275824	0.436639	0.366431	0.871894	0.689941
2513020848	1560001	1570000	0.247018	0.280614	0.236605	0	0.403007	0	0.208596	0	0.233272	0	0	0	0.220929	0.133846	0	0.159947	0	0.26293	0.328796	0.377053	0.196414	0.180771	0.136383	0	0	0.101454	0	0.230513	0.38556	0.307643	0.809278	0.621655	0.275824	0.436639	0.366431	0.871894	0.689941
2513020848	1565001	1575000	0.247018	0.280614	0.236605	0	0.533268	0	0.208596	0	0.365054	0	0	0	0.220929	0.133846	0	0.159947	0	0.166894	0.328796	0.277621	0.196414	0.282079	0.136383	0	0	0	0	0.233797	0.38602	0.305458	0.81073	0.62234	0.275824	0.436639	0.366431	0.871894	0.689941
2513020848	1570001	1580000	0	0	0	0	0.130262	0	0	0	0.131782	0	0	0	0	0	0	0	0	0	0	0	0	0.101309	0	0	0	0	0	0.236211	0.387716	0.307997	0.816575	0.623342	0.275824	0.436639	0.366431	0.871894	0.689941
2513020848	1575001	1585000	0	0	0.114452	0	0.130262	0	0	0	0.131782	0.239744	0	0.106091	0	0	0	0	0	0	0	0	0	0.101309	0	0	0	0	0	0.236516	0.390082	0.306399	0.815567	0.622565	0.275824	0.436639	0.366431	0.871894	0.689941
2513020848	1580001	1590000	0	0	0.114452	0	0.0993927	0	0.102191	0	0	0.239744	0	0.106091	0	0	0	0	0	0	0	0	0	0	0	0	0	0	0	0.236431	0.390826	0.305527	0.814811	0.621902	0.275824	0.436639	0.366431	0.871894	0.689941
2513020848	1585001	1595000	0	0	0.114452	0	0.54795	0.428741	0.102191	0	0	0.239744	0	0.106091	0	0	0	0	0.322839	0	0	0	0	0	0	0	0	0	0	0.237048	0.389088	0.303272	0.812501	0.621808	0.275824	0.436639	0.366431	0.871894	0.689941
2513020848	1590001	1600000	0.233742	0	0	0.30929	0.819414	0.428741	0.435234	0	0	0	0	0	0	0	0	0.116536	0.322839	0	0.105459	0.536731	0	0.472	0	0	0	0	0	0.233261	0.382158	0.303609	0.808566	0.618336	0.275824	0.436639	0.366431	0.871894	0.689941
2513020848	1595001	1605000	0.233742	0	0	0.30929	0.720021	0.428741	0.333044	0	0	0	0	0	0	0	0	0.116536	0.322839	0	0.105459	0.536731	0	0.472	0	0	0	0	0	0.233768	0.383671	0.305635	0.809982	0.619506	0.275824	0.436639	0.366431	0.871894	0.689941
2513020848	1600001	1610000	0.233742	0	0	0.30929	0.271464	0	0.333044	0	0	0	0	0	0	0	0	0.116536	0	0	0.105459	0.536731	0	0.472	0	0	0	0	0	0.232908	0.384366	0.308262	0.811923	0.619551	0.275824	0.436639	0.366431	0.871894	0.689941
2513020848	1605001	1615000	0	0	0	0	0	0	0	0	0	0	0	0	0	0	0	0	0	0	0	0	0	0	0	0	0	0	0	0.236051	0.388488	0.309227	0.816099	0.623295	0.275824	0.436639	0.366431	0.871894	0.689941
2513020848	1610001	1620000	0	0	0	0	0	0	0	0	0	0	0	0	0	0.113017	0	0	0	0	0	0	0	0	0	0	0	0	0	0.234908	0.38823	0.309697	0.815076	0.624086	0.275824	0.436639	0.366431	0.871894	0.689941
2513020848	1615001	1625000	0	0	0	0	0	0	0	0	0	0	0	0	0	0.113017	0	0	0	0	0	0	0	0	0	0.18615	0	0	0	0.234552	0.389237	0.311294	0.815224	0.623685	0.275824	0.436639	0.366431	0.871894	0.689941
2513020848	1620001	1630000	0	0	0	0	0	0	0	0	0	0	0	0	0	0.113017	0	0	0	0	0	0	0	0	0	0.18615	0	0	0	0.234238	0.389396	0.311732	0.81504	0.623767	0.275824	0.436639	0.366431	0.871894	0.689941
2513020848	1625001	1635000	0	0	0	0	0	0	0	0	0	0	0	0	0	0	0	0	0	0	0	0	0	0	0	0.18615	0	0	0	0.235509	0.38969	0.311215	0.816181	0.622883	0.275824	0.436639	0.366431	0.871894	0.689941
2513020848	1630001	1640000	0	0	0	0.342657	0	0	0	0	0	0	0	0	0	0	0	0	0	0	0	0	0	0	0	0	0	0	0	0.23542	0.389131	0.306452	0.814769	0.620756	0.275824	0.436639	0.366431	0.871894	0.689941
2513020848	1635001	1645000	0	0	0.129559	0.342657	0	0	0	0	0	0.147309	0	0	0	0	0.185087	0	0	0.212016	0.220429	0.170088	0.217525	0	0	0	0	0.115856	0	0.232901	0.386131	0.31033	0.811718	0.621616	0.275824	0.436639	0.366431	0.871894	0.689941
2513020848	1640001	1650000	0.0984689	0	0.129559	0.342657	0	0	0	0	0	0.147309	0	0	0	0	0.185087	0	0	0.212016	0.338134	0.275263	0.217525	0	0.114316	0	0	0.115856	0	0.23169	0.384743	0.31168	0.809961	0.620378	0.275824	0.436639	0.366431	0.871894	0.689941
2513020848	1645001	1655000	0.0984689	0	0.129559	0	0.186694	0.175828	0	0	0	0.147309	0	0	0.166171	0	0.185087	0	0	0.212016	0.539106	0.275263	0.217525	0.234324	0.114316	0	0	0.115856	0.214622	0.234363	0.380711	0.316804	0.818188	0.621739	0.275824	0.436639	0.366431	0.871894	0.689941
2513020848	1650001	1660000	0.0984689	0	0	0	0.186694	0.175828	0	0	0	0	0	0	0.166171	0	0	0	0	0	0.318677	0.105175	0	0.234324	0.114316	0	0	0	0.214622	0.240298	0.385029	0.311424	0.826824	0.62072	0.275824	0.436639	0.366431	0.871894	0.689941
2513020848	1655001	1665000	0.196303	0	0.206357	0.201799	0.186694	0.356507	0	0	0	0	0	0.147094	0.166171	0	0	0	0	0.0967901	0.200972	0	0	0.234324	0	0.146099	0	0	0.214622	0.235147	0.394863	0.299637	0.824838	0.607878	0.275824	0.436639	0.366431	0.871894	0.689941
2513020848	1660001	1670000	1.0603	0.85025	1.05963	1.30518	0.871948	1.07261	0.913804	0.749608	0.821969	0.721712	0.739873	0.974768	0.727515	0.78748	0.870491	0.812022	0.803979	0.898721	0.745866	0.800189	0.798304	0.83815	0.77664	1.15038	0.789307	1.02394	1.00891	0.224416	0.397048	0.298142	0.815387	0.578178	0.275824	0.436639	0.366431	0.871894	0.689941
2513020848	1665001	1675000	1.0603	0.85025	1.05963	1.30518	0.871948	1.07261	0.913804	0.749608	0.821969	0.721712	0.739873	0.974768	0.727515	0.78748	1.02016	0.812022	0.803979	0.898721	0.745866	0.800189	0.798304	0.83815	0.77664	1.15038	0.789307	1.02394	1.00891	0.184587	0.421471	0.27043	0.786705	0.428887	0.275824	0.451142	0.366431	0.871894	0.689941
2513020848	1670001	1680000	0.863994	0.85025	0.85327	1.10339	0.871948	0.891936	0.913804	0.749608	0.821969	0.721712	0.739873	0.827674	0.727515	0.78748	1.02016	0.812022	0.803979	0.801931	0.84668	0.800189	0.798304	0.933701	0.77664	1.00428	0.789307	1.02394	1.00891	0.232168	0.379735	0.316013	0.823248	0.569742	0.275824	0.436639	0.366431	0.871894	0.689941
2513020848	1675001	1685000	0	0	0	0	0	0	0	0	0	0	0	0	0	0	0.149664	0	0	0	0.100814	0	0	0.0955506	0	0	0	0	0	0.236908	0.383409	0.314539	0.811172	0.627274	0.275824	0.436639	0.366431	0.871894	0.689941
2513020848	1680001	1690000	0	0	0	0	0	0	0	0	0	0	0.280013	0	0	0	0	0	0	0	0.100814	0	0	0.0955506	0	0	0	0	0	0.236249	0.383897	0.307505	0.816271	0.625713	0.275824	0.436639	0.366431	0.871894	0.689941
2513020848	1685001	1695000	0.990479	0.479583	0.500816	0.485	0.990466	0.953242	0.931671	0.468636	0.462061	0.976565	0.771497	0.982539	0.979318	0.967093	0.978182	0.978598	0.974902	0.978155	0.981555	1.09256	0.978205	0.971426	0.971968	0.977436	0.989038	0.477159	0.970109	0.230165	0.399412	0.333259	0.814784	0.64059	0.275824	0.436639	0.368909	0.871894	0.690228
2513020848	1690001	1700000	0.990479	0.479583	0.500816	0.485	0.990466	0.953242	0.931671	0.468636	0.462061	0.976565	0.771497	0.982539	0.979318	0.967093	0.978182	0.978598	0.974902	0.978155	0.981555	1.25787	0.978205	1.15301	0.971968	0.977436	0.989038	0.477159	0.970109	0.230103	0.396655	0.332947	0.814829	0.639022	0.275824	0.436639	0.368909	0.871894	0.689941
2513020848	1695001	1705000	0.990479	0.479583	0.500816	0.485	0.990466	0.953242	0.931671	0.468636	0.462061	0.976565	0.491484	0.982539	0.979318	0.967093	0.978182	0.978598	0.974902	0.978155	0.981555	1.25787	0.978205	1.15301	0.971968	0.977436	0.989038	0.477159	0.970109	0.232289	0.395211	0.326625	0.814998	0.633237	0.275824	0.436639	0.366431	0.871894	0.689941
2513020848	1700001	1710000	0	0	0	0	0	0	0	0	0	0	0	0	0	0	0	0	0	0	0	0.16531	0	0.18158	0	0	0	0	0	0.235564	0.387119	0.31088	0.81603	0.623429	0.275824	0.436639	0.366431	0.871894	0.689941
2513020848	1705001	1715000	0	0	0.337055	0.45868	0	0	0	0	0	0	0	0	0	0	0	0	0	0	0	0	0	0	0	0	0	0	0	0.235359	0.389195	0.303894	0.812543	0.616999	0.275824	0.436639	0.366431	0.871894	0.689941
2513020848	1710001	1720000	0	0	0.337055	0.45868	0	0	0	0	0	0	0	0	0	0	0	0	0	0	0	0	0	0	0	0	0	0	0	0.235084	0.389487	0.301754	0.811098	0.614451	0.275824	0.436639	0.366431	0.871894	0.689941
2513020848	1715001	1725000	0	0	0.337055	0.45868	0.117436	0	0	0	0	0	0	0	0	0	0	0	0.178348	0	0.191983	0.149068	0	0	0	0	0	0	0	0.23459	0.388381	0.307978	0.810749	0.617856	0.275824	0.436639	0.366431	0.871894	0.689941
2513020848	1720001	1730000	0.104783	0	0	0	0.117436	0	0	0	0	0	0	0	0	0	0	0	0.178348	0	0.336999	0.149068	0	0.122752	0	0	0	0	0	0.235215	0.38665	0.313646	0.813414	0.62317	0.275824	0.436639	0.366431	0.871894	0.689941
2513020848	1725001	1735000	0.264649	0	0	0	0.327947	0	0	0	0	0	0	0	0	0.281293	0	0	0.419213	0	0.601482	0.389665	0.281208	0.396075	0	0	0	0.148047	0	0.231665	0.38179	0.323296	0.808391	0.621962	0.275824	0.436639	0.366431	0.871894	0.689941
2513020848	1730001	1740000	0.264649	0	0	0	0.210511	0	0	0	0	0	0	0	0	0.281293	0	0	0.240865	0	0.409498	0.240597	0.281208	0.396075	0	0	0	0.148047	0	0.232069	0.382058	0.319886	0.809617	0.620728	0.275824	0.436639	0.366431	0.871894	0.689941
2513020848	1735001	1745000	0.159866	0	0	0	0.210511	0	0	0	0	0	0	0	0	0.281293	0	0	0.240865	0	0.264482	0.240597	0.281208	0.273323	0	0	0	0.148047	0	0.23226	0.383404	0.319047	0.811061	0.621968	0.275824	0.436639	0.366431	0.871894	0.689941
2513020848	1740001	1750000	0	0	0	0	0	0	0	0	0	0	0	0	0	0	0	0	0	0	0	0	0	0	0	0	0	0	0	0.236051	0.388488	0.309227	0.816099	0.623295	0.275824	0.436639	0.366431	0.871894	0.689941
2513020848	1745001	1755000	0.138851	0	0	0.168577	0	0	0.171367	0	0	0	0	0.139945	0	0	0	0	0	0	0	0	0	0	0.137291	0	0	0	0.0980076	0.236089	0.389541	0.308655	0.817658	0.6202	0.275824	0.436639	0.366431	0.871894	0.689941
2513020848	1750001	1760000	0.138851	0	0	0.168577	0	0	0.171367	0	0	0	0	0.139945	0	0	0	0	0	0	0	0	0	0	0.137291	0	0	0	0.0980076	0.236089	0.389579	0.308633	0.817714	0.620084	0.275824	0.436639	0.366431	0.871894	0.689941
2513020848	1755001	1765000	0.2969	0.142881	0.161615	0.339165	0.211924	0.148513	0.171367	0	0	0.105738	0	0.139945	0	0	0	0	0	0	0	0	0	0	0.137291	0	0	0	0.0980076	0.235318	0.389253	0.301788	0.812939	0.610367	0.275824	0.436639	0.366431	0.871894	0.689941
2513020848	1760001	1770000	0.158049	0.142881	0.161615	0.170588	0.211924	0.148513	0	0	0	0.105738	0	0	0	0	0	0	0.150661	0	0	0.143469	0	0	0.153586	0	0	0	0	0.235432	0.38743	0.308718	0.811406	0.615316	0.275824	0.436639	0.366431	0.871894	0.689941
2513020848	1765001	1775000	0.158049	0.247828	0.161615	0.170588	0.211924	0.148513	0	0	0	0.105738	0	0	0	0	0	0	0.150661	0	0	0.143469	0	0	0.153586	0	0	0	0	0.235848	0.387537	0.308203	0.811303	0.615185	0.275824	0.436639	0.366431	0.871894	0.689941
2513020848	1770001	1780000	0	0.104946	0	0	0	0	0	0	0	0	0	0	0	0	0	0	0.150661	0	0	0.143469	0	0	0.153586	0	0	0	0	0.236431	0.387847	0.313357	0.814932	0.62209	0.275824	0.436639	0.366431	0.871894	0.689941
2513020848	1775001	1785000	0	0.104946	0	0	0	0	0	0	0	0	0	0	0	0	0	0	0	0	0	0	0	0	0	0	0	0	0	0.236485	0.388471	0.308508	0.8153	0.621992	0.275824	0.436639	0.366431	0.871894	0.689941
2513020848	1780001	1790000	0	0	0	0	0	0	0	0	0	0	0	0	0	0	0	0	0	0	0	0	0	0.106836	0	0	0	0	0	0.236553	0.387777	0.309866	0.816257	0.623209	0.275824	0.436639	0.366431	0.871894	0.689941
2513020848	1785001	1795000	0	0	0	0	0	0	0	0	0	0	0	0	0	0	0	0	0	0	0	0	0	0.106836	0	0	0	0	0	0.236552	0.387779	0.309865	0.816257	0.62321	0.275824	0.436639	0.366431	0.871894	0.689941
2513020848	1790001	1800000	0	0	0	0	0	0	0	0	0	0	0	0	0	0	0	0	0	0	0	0	0	0.106836	0	0	0	0	0	0.236478	0.387883	0.309771	0.816234	0.623222	0.275824	0.436639	0.366431	0.871894	0.689941
2513020848	1795001	1805000	0.105382	0	0	0	0	0	0	0	0.102598	0	0	0	0	0	0	0.126017	0	0	0.128841	0.107117	0	0.124707	0	0	0	0	0	0.235476	0.387758	0.31235	0.815225	0.623214	0.275824	0.436639	0.366431	0.871894	0.689941
2513020848	1800001	1810000	0.105382	0	0	0	0	0	0	0	0.102598	0	0	0	0	0	0	0.126017	0	0	0.128841	0.107117	0	0.124707	0	0	0	0	0	0.235439	0.38771	0.312558	0.815164	0.623209	0.275824	0.436639	0.366431	0.871894	0.689941
2513020848	1805001	1815000	0.328554	0.228667	0.227109	0.328423	0.227278	0	0	0	0.102598	0	0	0	0.206263	0	0	0.126017	0	0.239128	0.476077	0.550386	0.230697	0.335359	0.164355	0	0	0	0	0.23038	0.385016	0.309498	0.807453	0.618196	0.275824	0.436639	0.366431	0.871894	0.689941
2513020848	1810001	1820000	0.223172	0.228667	0.227109	0.328423	0.227278	0	0	0	0	0	0	0	0.206263	0	0	0	0	0.239128	0.347236	0.443268	0.230697	0.210652	0.164355	0.471644	0	0	0	0.227364	0.390301	0.308889	0.806258	0.617637	0.275824	0.436639	0.366431	0.871894	0.689941
2513020848	1815001	1825000	0.223172	0.228667	0.227109	0.328423	0.227278	0	0	0	0	0	0	0	0.206263	0	0.49878	0	0	0.239128	0.347236	0.443268	0.230697	0.210652	0.164355	0.471644	0	0	0	0.211999	0.381137	0.320264	0.770137	0.624888	0.275824	0.436639	0.366431	0.871894	0.689941
2513020848	1820001	1830000	0	0	0	0	0	0	0	0	0	0	0	0	0	0	0.49878	0	0	0	0	0	0	0	0	0.471644	0	0	0	0.218693	0.39269	0.36182	0.763382	0.661579	0.275824	0.436639	0.38935	0.871894	0.698628
2513020848	1825001	1835000	0	0	0	0	0	0	0	0	0	0	0	0	0	0	0.49878	0	0	0	0	0	0	0	0	0	0	0	0	0.233801	0.376157	0.321127	0.795976	0.639415	0.275824	0.436639	0.366431	0.871894	0.689941
2513020848	1830001	1840000	0	0	0	0.320455	0	0	0	0	0	0	0	0	0	0	0	0	0	0	0	0.166452	0.202078	0	0	0	0	0	0.103143	0.235264	0.386546	0.309512	0.818233	0.615429	0.275824	0.436639	0.366431	0.871894	0.689941
2513020848	1835001	1845000	0	0	0	0.320455	0	0	0	0	0	0	0	0	0	0	0	0	0	0	0	0.166452	0.202078	0	0	0	0	0	0.103143	0.235469	0.387062	0.309427	0.817659	0.617542	0.275824	0.436639	0.366431	0.871894	0.689941
2513020848	1840001	1850000	0	0.110025	0	0.320455	0	0	0	0	0	0	0	0	0	0	0	0	0	0	0	0.166452	0.202078	0	0	0	0	0	0.103143	0.236263	0.38713	0.308167	0.816171	0.615679	0.275824	0.436639	0.366431	0.871894	0.689941
2513020848	1845001	1855000	0	0.110025	0	0	0	0	0	0	0	0	0	0	0	0	0	0	0	0	0	0	0	0	0	0	0	0	0	0.236621	0.388466	0.308284	0.815051	0.621585	0.275824	0.436639	0.366431	0.871894	0.689941
2513020848	1850001	1860000	0	0.110025	0	0.211446	0	0	0.199618	0	0	0.186483	0	0.152803	0	0	0	0	0.145038	0.127583	0.124338	0.116029	0	0.129333	0.109636	0	0	0	0	0.235451	0.389304	0.309322	0.812876	0.622251	0.275824	0.436639	0.366431	0.871894	0.689941
2513020848	1855001	1865000	0	0	0	0.211446	0	0	0.199618	0	0	0.186483	0	0.152803	0	0	0	0	0.145038	0.127583	0.124338	0.116029	0	0.129333	0.109636	0	0	0	0	0.234506	0.389567	0.310661	0.813424	0.624323	0.275824	0.436639	0.366431	0.871894	0.689941
2513020848	1860001	1870000	0	0	0	0.211446	0	0	0.199618	0	0	0.186483	0	0.152803	0	0	0	0	0.145038	0.127583	0.124338	0.116029	0	0.129333	0.109636	0	0	0	0	0.232596	0.390992	0.312559	0.809963	0.625466	0.275824	0.436639	0.366431	0.871894	0.689941
2513020848	1865001	1875000	0	0	0	0	0	0	0	0	0	0	0	0	0	0	0	0	0	0	0	0	0	0	0	0	0	0	0	0.236051	0.388488	0.309227	0.816099	0.623295	0.275824	0.436639	0.366431	0.871894	0.689941
2513020848	1870001	1880000	0	0	0	0	0	0	0	0	0	0	0	0	0	0	0	0	0	0	0	0	0	0	0	0	0	0	0	0.236051	0.388488	0.309227	0.816099	0.623295	0.275824	0.436639	0.366431	0.871894	0.689941
2513020848	1875001	1885000	0	0	0	0.171186	0	0	0	0	0	0	0	0	0	0.201163	0	0	0	0	0.192417	0	0	0	0	0	0	0	0.212687	0.233271	0.38628	0.312101	0.818377	0.619422	0.275824	0.436639	0.366431	0.871894	0.689941
2513020848	1880001	1890000	0	0	0	0.171186	0	0	0.112542	0	0	0	0	0	0	0.201163	0	0	0.193463	0	0.378157	0.175366	0.195111	0.29991	0	0	0	0	0.212687	0.235753	0.380392	0.321878	0.817555	0.621843	0.275824	0.436639	0.366431	0.871894	0.689941
2513020848	1885001	1895000	0	0	0	0.171186	0	0	0.112542	0	0	0	0	0	0	0.201163	0	0	0.193463	0	0.378157	0.175366	0.195111	0.29991	0	0	0	0	0.212687	0.235816	0.382269	0.318887	0.81725	0.622178	0.275824	0.436639	0.366431	0.871894	0.689941
2513020848	1890001	1900000	0	0	0	0	0	0	0.112542	0	0	0	0	0	0	0	0	0	0.193463	0	0.18574	0.175366	0.195111	0.29991	0	0	0	0	0	0.237843	0.384331	0.316035	0.815468	0.625022	0.275824	0.436639	0.366431	0.871894	0.689941
2513020848	1895001	1905000	0.316587	0.359834	0	0	0.316699	0.302001	0	0	0	0.253258	0	0	0.455735	0.424796	0.248869	0.170576	0	0.181377	0.192188	0.365958	0.225662	0.193	0	0	0	0.212095	0.216415	0.230987	0.388303	0.314654	0.812289	0.624175	0.275824	0.436639	0.366431	0.871894	0.689941
2513020848	1900001	1910000	0.316587	0.359834	0.407294	0	0.417995	0.302001	0.300204	0	0	0.499063	0	0	0.455735	0.424796	0.248869	0.170576	0.171609	0.181377	0.550335	0.607714	0.225662	0.193	0.283833	0	0	0.212095	0.216415	0.230381	0.383667	0.313785	0.803977	0.619102	0.275824	0.436639	0.366431	0.871894	0.689941
2513020848	1905001	1915000	0.316587	0.455281	0.407294	0	0.417995	0.302001	0.424886	0	0	0.499063	0	0	0.455735	0.424796	0.248869	0.320954	0.171609	0.181377	0.696184	0.607714	0.225662	0.327857	0.283833	0	0	0.212095	0.216415	0.231109	0.379998	0.317779	0.795536	0.617837	0.275824	0.436639	0.366431	0.871894	0.689941
2513020848	1910001	1920000	0	0.0954472	0.407294	0	0.101296	0	0.424886	0	0	0.245805	0	0	0	0	0	0.150378	0.171609	0	0.503995	0.241755	0	0.134858	0.283833	0	0	0	0	0.241645	0.380786	0.30628	0.803749	0.61651	0.275824	0.436639	0.366431	0.871894	0.689941
2513020848	1915001	1925000	0	0.0954472	0	0.096342	0	0	0.124682	0	0	0	0	0	0	0	0	0.150378	0	0	0.145849	0	0	0.134858	0	0	0	0	0	0.239	0.38793	0.309061	0.814305	0.623141	0.275824	0.436639	0.366431	0.871894	0.689941
2513020848	1920001	1930000	0	0	0	0.096342	0	0	0	0	0	0	0	0	0	0	0	0	0	0	0	0	0	0	0	0	0	0	0	0.23586	0.38868	0.308388	0.815697	0.622529	0.275824	0.436639	0.366431	0.871894	0.689941
2513020848	1925001	1935000	0	0.104151	0	0.211691	0.0996259	0	0	0	0	0	0	0.13166	0	0.193534	0.180028	0	0	0	0.18546	0.155853	0	0	0	0	0	0	0	0.231949	0.389075	0.311236	0.809838	0.624805	0.275824	0.436639	0.366431	0.871894	0.689941
2513020848	1930001	1940000	0	0.104151	0	0.115349	0.0996259	0	0	0	0	0	0	0.13166	0	0.193534	0.180028	0	0	0	0.18546	0.155853	0	0	0	0	0	0	0	0.232988	0.388805	0.311396	0.811519	0.625021	0.275824	0.436639	0.366431	0.871894	0.689941
2513020848	1935001	1945000	0	0.104151	0	0.115349	0.0996259	0	0	0	0	0	0	0.13166	0	0.193534	0.180028	0	0	0	0.18546	0.155853	0	0	0	0	0	0	0	0.233423	0.388759	0.311085	0.812175	0.624775	0.275824	0.436639	0.366431	0.871894	0.689941
2513020848	1940001	1950000	0.142687	0	0	0.157093	0.12524	0	0.118248	0	0	0	0	0	0	0	0	0	0	0	0	0	0	0	0	0	0	0	0	0.234904	0.387907	0.307852	0.814699	0.619594	0.275824	0.436639	0.366431	0.871894	0.689941
2513020848	1945001	1955000	0.142687	0	0	0.157093	0.12524	0	0.118248	0	0	0	0	0	0	0	0	0	0	0.110591	0.151022	0	0	0.238013	0	0	0	0	0	0.23365	0.384991	0.310861	0.813003	0.618964	0.275824	0.436639	0.366431	0.871894	0.689941
2513020848	1950001	1960000	0.142687	0	0	0.157093	0.12524	0	0.118248	0	0	0	0	0	0	0	0	0	0	0.110591	0.151022	0	0	0.238013	0	0	0	0	0	0.233786	0.38519	0.310766	0.813181	0.619212	0.275824	0.436639	0.366431	0.871894	0.689941
2513020848	1955001	1965000	0	0	0	0.212443	0	0	0	0	0	0	0	0	0	0	0	0	0	0.110591	0.151022	0	0	0.238013	0	0	0	0	0	0.235075	0.386548	0.310832	0.814445	0.62288	0.275824	0.436639	0.366431	0.871894	0.689941
2513020848	1960001	1970000	0	0	0	0.212443	0	0	0	0	0	0	0	0	0	0	0	0	0	0	0	0	0	0	0	0	0	0	0	0.235701	0.388841	0.307692	0.815364	0.621893	0.275824	0.436639	0.366431	0.871894	0.689941
2513020848	1965001	1975000	0	0	0.0995187	0.212443	0	0	0	0	0	0	0	0	0	0.0978393	0	0	0	0	0	0	0.129706	0.0961434	0	0	0	0	0	0.235411	0.387395	0.308485	0.813103	0.621219	0.275824	0.436639	0.366431	0.871894	0.689941
2513020848	1970001	1980000	0	0	0.0995187	0.155511	0.152455	0	0	0	0	0.224745	0.23268	0	0.196715	0.0978393	0.195538	0.197563	0.223529	0	0.393044	0.210669	0.349332	0.0961434	0.164157	0	0	0	0	0.239735	0.386798	0.314394	0.805127	0.637607	0.275824	0.436639	0.366431	0.871894	0.689941
2513020848	1975001	1985000	0	0	0.0995187	0.155511	0.152455	0	0	0	0	0.224745	0.23268	0	0.196715	0.0978393	0.195538	0.197563	0.223529	0	0.393044	0.210669	0.349332	0.0961434	0.164157	0	0	0	0	0.239859	0.386743	0.314568	0.80476	0.638078	0.275824	0.436639	0.366431	0.871894	0.689941
2513020848	1980001	1990000	0	0	0	0.155511	0.152455	0	0	0	0	0.224745	0.23268	0	0.196715	0	0.195538	0.197563	0.223529	0	0.393044	0.210669	0.219627	0	0.164157	0	0	0	0	0.245049	0.389401	0.317379	0.797995	0.655847	0.275848	0.436639	0.366431	0.871894	0.696266
2513020848	1985001	1995000	0	0	0.138497	0.141463	0.128194	0	0	0	0	0	0	0	0	0.169474	0.204181	0	0	0	0.181618	0.162219	0	0.180832	0	0	0	0.131302	0	0.218052	0.36893	0.335035	0.786663	0.621292	0.275824	0.436639	0.369222	0.871894	0.689941
2513020848	1990001	2000000	0	0	0.256678	0.141463	0.128194	0	0	0	0	0.161839	0	0	0	0.169474	0.204181	0	0	0	0.181618	0.325939	0	0.36897	0	0	0	0.131302	0	0.227955	0.377597	0.318992	0.801017	0.618376	0.275824	0.436639	0.366431	0.871894	0.689941
2513020848	1995001	2005000	0.177935	0.229178	0.256678	0.141463	0.128194	0	0	0	0	0.161839	0	0	0	0.169474	0.204181	0	0.134445	0	0.35059	0.476725	0	0.36897	0.126054	0.136598	0	0.131302	0.136889	0.231927	0.38218	0.314212	0.807231	0.613998	0.275824	0.436639	0.366431	0.871894	0.689941
2513020848	2000001	2010000	0.177935	0.229178	0.118181	0	0	0	0	0	0	0.161839	0	0	0	0	0	0	0.134445	0	0.333978	0.457266	0	0.377078	0.126054	0.136598	0	0	0.136889	0.235427	0.385195	0.311436	0.81323	0.617357	0.275824	0.436639	0.366431	0.871894	0.689941
2513020848	2005001	2015000	0.177935	0.229178	0	0	0	0	0	0	0	0	0	0	0	0	0	0	0.134445	0.176058	0.333978	0.293545	0	0.18894	0.126054	0.136598	0	0	0.136889	0.232652	0.384468	0.313576	0.812589	0.617665	0.275824	0.436639	0.366431	0.871894	0.689941
2513020848	2010001	2020000	0	0	0	0	0	0	0	0	0	0	0	0	0	0	0	0	0	0.176058	0.165006	0.14276	0	0.18894	0	0	0	0	0	0.230271	0.383244	0.316519	0.81302	0.625941	0.275824	0.436639	0.366431	0.871894	0.689941
2513020848	2015001	2025000	0	0	0	0	0	0	0	0	0	0	0	0	0	0	0	0	0	0.176058	0	0	0	0	0	0	0	0	0	0.230707	0.387141	0.311115	0.814293	0.624757	0.275824	0.436639	0.366431	0.871894	0.689941
2513020848	2020001	2030000	0	0	0	0	0	0	0	0	0	0	0	0	0	0	0	0	0	0	0	0	0	0	0	0	0	0	0	0.236051	0.388488	0.309227	0.816099	0.623295	0.275824	0.436639	0.366431	0.871894	0.689941
2513020848	2025001	2035000	0	0	0	0	0	0	0	0	0	0	0	0	0	0	0	0	0	0	0	0	0	0	0	0	0	0	0	0.236051	0.388488	0.309227	0.816099	0.623295	0.275824	0.436639	0.366431	0.871894	0.689941
2513020848	2030001	2040000	0	0	0	0	0	0	0	0	0	0	0	0	0.148583	0	0	0	0	0	0	0	0	0	0	0	0	0	0	0.236772	0.390374	0.308504	0.817754	0.626405	0.275824	0.436639	0.366431	0.871894	0.689941
2513020848	2035001	2045000	0	0	0	0	0.186868	0	0.149758	0	0	0	0	0	0.148583	0	0	0	0	0	0	0	0	0	0.249584	0.131362	0	0	0	0.237665	0.390205	0.307957	0.818584	0.625988	0.275824	0.436639	0.366431	0.871894	0.689941
2513020848	2040001	2050000	0.181666	0	0	0	0.186868	0	0.149758	0	0	0	0	0	0.148583	0	0	0	0	0	0	0.11828	0	0.130665	0.249584	0.131362	0	0	0	0.235889	0.388737	0.30762	0.816882	0.623234	0.275824	0.436639	0.366431	0.871894	0.689941
2513020848	2045001	2055000	0.181666	0	0	0	0.186868	0	0.149758	0	0	0	0	0	0	0	0	0	0	0	0	0.11828	0	0.130665	0.249584	0.131362	0	0	0	0.235011	0.386361	0.308717	0.814703	0.619366	0.275824	0.436639	0.366431	0.871894	0.689941
2513020848	2050001	2060000	0.181666	0.108683	0	0	0	0	0	0	0	0	0	0	0	0	0	0.156889	0.150479	0	0.127457	0.22361	0.101373	0.261034	0	0	0	0	0	0.236046	0.386555	0.312436	0.810313	0.621163	0.275824	0.436639	0.366431	0.871894	0.689941
2513020848	2055001	2065000	0	0.108683	0	0	0	0	0	0	0	0	0	0	0	0	0	0.156889	0.150479	0	0.127457	0.105331	0.101373	0.130368	0	0	0	0	0	0.2381	0.388126	0.312848	0.811927	0.624183	0.275824	0.436639	0.366431	0.871894	0.689941
2513020848	2060001	2070000	0	0.108683	0	0	0	0	0	0	0	0	0	0	0	0	0	0.156889	0.150479	0.107839	0.226791	0.212006	0.101373	0.130368	0	0	0	0	0	0.235141	0.386409	0.317273	0.808176	0.62607	0.275824	0.436639	0.366431	0.871894	0.689941
2513020848	2065001	2075000	0	0	0	0	0	0	0	0	0	0	0	0	0	0	0	0	0	0.107839	0.0993338	0.106675	0	0	0	0	0	0	0	0.232928	0.387234	0.311407	0.814662	0.624488	0.275824	0.436639	0.366431	0.871894	0.689941
2513020848	2070001	2080000	0	0	0	0	0	0	0	0	0	0	0	0	0	0	0	0	0	0.261516	0.0993338	0.106675	0.159073	0.173613	0	0	0	0	0	0.23269	0.385215	0.313769	0.814269	0.624886	0.275824	0.436639	0.366431	0.871894	0.689941
2513020848	2075001	2085000	0	0	0	0	0	0	0	0	0	0	0	0	0	0	0	0	0	0.153677	0	0	0.159073	0.173613	0	0	0	0	0	0.234965	0.385496	0.312893	0.815232	0.624121	0.275824	0.436639	0.366431	0.871894	0.689941
2513020848	2080001	2090000	0	0	0	0	0	0	0	0	0	0	0	0	0	0	0	0	0	0.153677	0	0	0.159073	0.173613	0	0	0	0	0	0.234665	0.384667	0.313922	0.814982	0.62435	0.275824	0.436639	0.366431	0.871894	0.689941
2513020848	2085001	2095000	0	0	0	0	0	0	0	0	0	0	0	0	0	0	0	0	0	0	0	0	0	0	0	0	0	0	0	0.236051	0.388488	0.309227	0.816099	0.623295	0.275824	0.436639	0.366431	0.871894	0.689941
2513020848	2090001	2100000	0	0	0	0	0	0	0	0	0	0	0	0	0	0	0	0	0	0	0	0	0	0	0	0	0	0	0	0.236051	0.388488	0.310621	0.816339	0.622619	0.275824	0.436639	0.366431	0.871894	0.689941
2513020848	2095001	2105000	0	0	0	0	0	0	0	0	0	0	0	0	0	0	0	0	0	0	0	0	0	0	0	0	0	0	0	0.236051	0.388488	0.310696	0.816351	0.622583	0.275824	0.436639	0.366431	0.871894	0.689941
2513020848	2100001	2110000	0.13707	0.319613	0.313863	0.213	0.113999	0.151963	0	0	0	0	0	0	0	0	0	0	0	0	0	0	0	0	0	0	0	0.121628	0.134087	0.236712	0.387493	0.304902	0.813448	0.607153	0.275824	0.436639	0.366431	0.871894	0.689941
2513020848	2105001	2115000	0.13707	0.319613	0.313863	0.213	0.113999	0.151963	0	0	0	0	0	0	0	0	0	0	0	0	0	0	0	0	0	0	0	0.121628	0.134087	0.236653	0.387579	0.304096	0.81346	0.609138	0.275824	0.436639	0.366431	0.871894	0.689941
2513020848	2110001	2120000	0.13707	0.319613	0.313863	0.213	0.113999	0.151963	0	0	0	0	0	0.122607	0	0	0	0	0	0	0.154187	0.14532	0	0.160572	0	0	0	0.121628	0.134087	0.236356	0.388365	0.305784	0.81374	0.611837	0.275824	0.436639	0.366431	0.871894	0.689941
2513020848	2115001	2125000	0	0	0	0	0	0	0	0	0	0	0	0.122607	0	0	0	0	0	0	0.154187	0.14532	0	0.267253	0	0	0	0	0	0.236191	0.388739	0.311433	0.816307	0.625213	0.275824	0.436639	0.366431	0.871894	0.689941
2513020848	2120001	2130000	0	0	0	0	0	0	0	0	0	0	0	0.122607	0	0	0	0	0	0	0.154187	0.265633	0	0.376154	0	0	0	0.0959004	0	0.235652	0.38768	0.31361	0.817486	0.624629	0.275824	0.436639	0.366431	0.871894	0.689941
2513020848	2125001	2135000	0	0	0	0	0	0	0	0	0	0	0	0	0	0	0	0	0	0	0	0.120313	0	0.215582	0	0	0	0.0959004	0	0.236005	0.38696	0.311418	0.817228	0.622555	0.275824	0.436639	0.366431	0.871894	0.689941
2513020848	2130001	2140000	0	0	0	0	0	0	0	0	0	0	0	0	0	0	0	0	0	0	0	0.120313	0	0.108901	0	0	0	0.0959004	0	0.235504	0.387408	0.311143	0.817258	0.622519	0.275824	0.436639	0.366431	0.871894	0.689941
2513020848	2135001	2145000	0	0	0	0	0	0	0	0	0	0	0	0	0	0	0	0	0	0.148151	0.17453	0.157048	0	0.14265	0	0	0	0	0	0.233472	0.386339	0.314443	0.815652	0.62367	0.275824	0.436639	0.366431	0.871894	0.689941
2513020848	2140001	2150000	0	0	0	0	0	0	0	0	0	0	0	0	0	0	0	0	0	0.148151	0.17453	0.157048	0	0.14265	0	0	0	0	0	0.23336	0.386245	0.314674	0.815629	0.623685	0.275824	0.436639	0.366431	0.871894	0.689941
2513020848	2145001	2155000	0	0	0	0	0	0	0	0	0	0	0	0	0	0	0	0	0	0.148151	0.17453	0.157048	0	0.14265	0	0	0	0	0	0.234112	0.386873	0.313139	0.815774	0.623581	0.275824	0.436639	0.366431	0.871894	0.689941
2513020848	2150001	2160000	0	0	0	0	0	0	0	0	0	0	0	0	0	0	0	0	0	0	0	0	0	0	0	0	0	0	0	0.236051	0.388488	0.309227	0.816099	0.623295	0.275824	0.436639	0.366431	0.871894	0.689941
2513020848	2155001	2165000	0	0	0	0	0	0	0	0	0	0	0	0	0	0	0	0	0	0	0	0	0	0	0	0	0	0	0	0.236051	0.388488	0.309227	0.816099	0.623295	0.275824	0.436639	0.366431	0.871894	0.689941
2513020848	2160001	2170000	0	0	0	0	0	0	0	0	0	0	0	0	0	0	0	0	0	0	0	0	0	0	0	0	0	0	0	0.236051	0.388488	0.309227	0.816099	0.623295	0.275824	0.436639	0.366431	0.871894	0.689941
2513020848	2165001	2175000	1.61152	1.50781	1.59205	1.10303	1.48634	1.32027	1.43443	1.65418	1.49089	1.60206	1.60593	1.53743	1.5189	1.72273	1.64098	1.61277	1.64458	1.65026	1.61948	1.70084	1.48619	1.73248	1.85271	1.52213	1.56353	1.66479	1.63187	0.516035	0.289517	0.0155401	0.960701	0.580174	0.543965	0.436639	0.366431	0.964234	0.689941
2513020848	2170001	2180000	1.61152	1.50781	1.59205	1.10303	1.48634	1.48203	1.43443	1.65418	1.49089	1.60206	1.60593	1.53743	1.5189	1.72273	1.64098	1.61277	1.64458	1.65026	1.61948	1.70084	1.48619	1.73248	1.85271	1.52213	1.56353	1.66479	1.63187	0.950516	0.433726	0.00719862	0.960987	0.533835	0.955341	0.462174	0.366431	0.964234	0.689941
2513020848	2175001	2185000	1.61152	1.50781	1.59205	1.10303	1.62232	1.62972	1.43443	1.65418	1.49089	1.60206	1.60593	1.53743	1.5189	1.72273	1.64098	1.61277	1.64458	1.65026	1.61948	1.70084	1.48619	1.73248	1.85271	1.52213	1.56353	1.66479	1.63187	0.980218	0.384141	0.00246969	0.501523	0.246792	0.981871	0.436639	0.154421	0.871894	0.689941
2513020848	2180001	2190000	0	0	0	0	0.135986	0.309445	0	0	0	0	0	0	0	0	0	0	0	0	0	0	0	0	0	0	0	0	0	0.23818	0.383613	0.315146	0.820164	0.610848	0.275824	0.436639	0.366431	0.871894	0.689941
2513020848	2185001	2195000	0	0	0	0	0.135986	0.147691	0	0	0	0	0	0	0	0	0	0	0	0	0	0	0	0	0	0	0	0	0	0.236158	0.387711	0.312911	0.817851	0.619685	0.275824	0.436639	0.366431	0.871894	0.689941
2513020848	2190001	2200000	0.427119	0.334492	0.308146	1.075	0.31454	0.339753	0.85845	0.413718	0.432594	0.373201	0.405019	0.332005	0.464766	0.410693	0.440587	0.849628	0.368331	0.404713	0.446343	0.540984	0.512655	0.532385	0.508913	0.599572	0.0915371	0.502226	1.06613	0.238278	0.383639	0.311711	0.831529	0.610543	0.275824	0.436639	0.366431	0.871894	0.689941
2513020848	2195001	2205000	0.53676	0.457563	0.404412	1.18349	0.422099	0.630362	1.00413	0.543094	0.548778	0.476905	0.498931	0.432589	0.581735	0.540327	0.69775	0.969588	0.443243	0.508186	0.532648	0.701437	0.658007	0.671713	0.614632	0.832347	0.145667	0.755875	1.334	0.238563	0.380092	0.31241	0.837568	0.606371	0.275824	0.436639	0.366431	0.8736	0.689941
2513020848	2200001	2210000	0.53676	0.457563	0.404412	1.18349	0.422099	0.630362	1.00413	0.543094	0.548778	0.476905	0.498931	0.432589	0.581735	0.540327	0.69775	0.969588	0.443243	0.508186	0.532648	0.701437	0.658007	0.671713	0.614632	0.832347	0.145667	0.755875	1.334	0.239242	0.378029	0.313261	0.842835	0.602132	0.275824	0.436639	0.366431	0.874487	0.689941
2513020848	2205001	2215000	0.109641	0.123071	0.0962658	0.108493	0.107559	0.290609	0.145676	0.129376	0.116184	0.103704	0.0939126	0.100584	0.116969	0.229816	0.257163	0.11996	0.188288	0.103473	0.328244	0.262641	0.145352	0.139328	0.105719	0.232775	0.0541295	0.25365	0.267876	0.23383	0.383298	0.313848	0.817421	0.623082	0.275824	0.436639	0.366431	0.871894	0.689941
2513020848	2210001	2220000	0	0	0	0	0	0	0	0	0	0	0	0	0	0.100182	0	0	0.113376	0	0.241938	0.102188	0	0	0	0	0	0	0	0.234508	0.387363	0.312023	0.813314	0.625531	0.275824	0.436639	0.366431	0.871894	0.689941
2513020848	2215001	2225000	0	0	0	0	0	0	0	0	0	0	0	0	0	0.100182	0	0	0.113376	0	0.241938	0.102188	0	0	0	0	0	0	0	0.23458	0.387414	0.312135	0.813418	0.625594	0.275824	0.436639	0.366431	0.871894	0.689941
2513020848	2220001	2230000	0	0	0	0	0	0	0	0	0	0	0	0	0	0	0.126155	0	0	0	0	0	0	0	0	0	0	0	0	0.235877	0.387584	0.310281	0.814655	0.624599	0.275824	0.436639	0.366431	0.871894	0.689941
2513020848	2225001	2235000	0	0	0.11212	0	0.11956	0	0	0	0	0	0	0	0	0	0.126155	0	0	0	0.104225	0.0992089	0	0	0	0	0	0	0	0.233944	0.385865	0.310353	0.810485	0.623321	0.275824	0.436639	0.366431	0.871894	0.689941
2513020848	2230001	2240000	0	0	0.11212	0	0.11956	0	0	0	0	0	0	0	0	0	0.126155	0.121839	0	0	0.104225	0.0992089	0	0.0969609	0	0	0	0	0	0.235742	0.387125	0.311661	0.809914	0.624205	0.275824	0.436639	0.366431	0.871894	0.689941
2513020848	2235001	2245000	0	0	0.11212	0	0.11956	0	0	0	0	0	0	0	0	0	0	0.121839	0	0	0.104225	0.0992089	0	0.0969609	0	0	0	0	0	0.236009	0.38846	0.310255	0.812918	0.622748	0.275824	0.436639	0.366431	0.871894	0.689941
2513020848	2240001	2250000	0	0	0	0	0	0	0	0	0	0	0	0	0	0	0	0.121839	0	0	0	0	0	0.0969609	0	0	0	0	0	0.236767	0.388904	0.310157	0.815391	0.623876	0.275824	0.436639	0.366431	0.871894	0.689941
2513020848	2245001	2255000	0	0	0	0	0	0	0	0	0	0	0	0	0	0	0	0	0	0	0	0	0	0	0	0	0	0	0	0.236051	0.388488	0.309227	0.816099	0.623295	0.275824	0.436639	0.366431	0.871894	0.689941
2513020848	2250001	2260000	0	0	0	0	0	0	0	0	0	0	0	0	0	0	0	0	0	0	0	0	0	0	0	0	0	0	0	0.236051	0.388488	0.309227	0.816099	0.623295	0.275824	0.436639	0.366431	0.871894	0.689941
2513020848	2255001	2265000	0	0	0	0.413716	0.248297	0	0	0	0.207016	0	0	0	0	0.248127	0	0	0	0	0.206455	0	0	0.219892	0	0.240054	0	0.19375	0.229224	0.232687	0.387188	0.310045	0.819747	0.617143	0.275824	0.436639	0.366431	0.871894	0.689941
2513020848	2260001	2270000	0	0.179046	0.276385	0.68218	0.415318	0.165104	0	0.17217	0.453862	0.312068	0.467408	0	0.161351	0.525274	0.171766	0.258959	0.235445	0.200931	0.6316	0.139804	0	0.514298	0.258666	0.374994	0.197575	0.312262	0.229224	0.23232	0.3833	0.309016	0.812255	0.623313	0.275824	0.436639	0.366431	0.871894	0.689941
2513020848	2265001	2275000	0	0.179046	0.276385	0.68218	0.415318	0.165104	0	0.17217	0.453862	0.312068	0.467408	0	0.266581	0.525274	0.171766	0.258959	0.35006	0.200931	0.789898	0.242031	0	0.642021	0.375995	0.374994	0.197575	0.312262	0.229224	0.233992	0.383846	0.311369	0.813148	0.626619	0.275824	0.436639	0.366431	0.871894	0.689941
2513020848	2270001	2280000	0	0.179046	0.276385	0.268465	0.167021	0.165104	0	0.17217	0.246846	0.312068	0.467408	0	0.266581	0.277146	0.171766	0.258959	0.35006	0.200931	0.583443	0.242031	0	0.422129	0.375995	0.13494	0.197575	0.118512	0	0.23669	0.385418	0.310471	0.810935	0.630445	0.275824	0.436639	0.366431	0.871894	0.689941
2513020848	2275001	2285000	0	0	0	0	0	0	0	0	0	0	0	0	0.105229	0	0	0	0.114615	0	0.158298	0.102227	0	0.127723	0.117329	0	0	0	0	0.237032	0.388407	0.311095	0.816438	0.625917	0.275824	0.436639	0.366431	0.871894	0.689941
2513020848	2280001	2290000	0	0	0	0	0	0	0	0	0	0	0	0	0	0	0	0.108696	0	0	0.128538	0	0	0.105895	0.103979	0	0	0	0	0.237223	0.388258	0.311045	0.815399	0.623913	0.275824	0.436639	0.366431	0.871894	0.689941
2513020848	2285001	2295000	0	0	0	0	0	0	0	0	0	0	0	0	0	0	0	0.108696	0	0	0.128538	0	0	0.105895	0.103979	0	0	0	0	0.237977	0.388112	0.312213	0.814947	0.624308	0.275824	0.436639	0.366431	0.871894	0.689941
2513020848	2290001	2300000	0.130732	0.432184	0.131479	0.690656	0.209743	0.154166	0.161348	0	0	0.118934	0	0	0.138851	0	0.148142	0.336857	0.16961	0.137958	0.269946	0.130145	0.262363	0.244617	0.260235	0.172514	0.147227	0.118205	0.123447	0.24146	0.390512	0.308976	0.806884	0.609581	0.275824	0.436639	0.366431	0.871894	0.689941
2513020848	2295001	2305000	0.130732	0.432184	0.131479	0.690656	0.209743	0.154166	0.161348	0	0	0.118934	0	0	0.138851	0	0.148142	0.228161	0.16961	0.137958	0.141407	0.130145	0.262363	0.138722	0.156256	0.172514	0.147227	0.118205	0.123447	0.239252	0.390716	0.306217	0.808671	0.609626	0.275824	0.436639	0.366431	0.871894	0.689941
2513020848	2300001	2310000	0.130732	0.432184	0.131479	0.690656	0.209743	0.154166	0.161348	0	0	0.118934	0	0	0.138851	0	0.148142	0.228161	0.16961	0.137958	0.141407	0.130145	0.262363	0.138722	0.156256	0.172514	0.147227	0.118205	0.123447	0.238323	0.390069	0.307072	0.810814	0.613547	0.275824	0.436639	0.366431	0.871894	0.689941
2513020848	2305001	2315000	0	0	0	0	0	0	0	0	0	0	0	0	0	0	0	0	0	0	0	0	0	0	0	0	0	0	0	0.236051	0.388488	0.309227	0.816099	0.623295	0.275824	0.436639	0.366431	0.871894	0.689941
2513020848	2310001	2320000	0	0	0.280085	0.179118	0.338932	0	0.289555	0	0	0.234601	0.110098	0.233487	0	0	0.109701	0.139599	0	0.159306	0.139689	0.125369	0	0.267551	0.269182	0	0	0	0	0.23527	0.389074	0.303751	0.808604	0.622789	0.275824	0.436639	0.366431	0.871894	0.689941
2513020848	2315001	2325000	0.141543	0	0.280085	0.403647	0.513637	0	0.472073	0	0.188189	0.529166	0.250719	0.352895	0	0	0.109701	0.139599	0	0.159306	0.139689	0.125369	0	0.267551	0.269182	0.13565	0	0.256114	0.258267	0.232421	0.393378	0.282745	0.822577	0.593717	0.275824	0.436639	0.366431	0.871894	0.689941
2513020848	2320001	2330000	0.141543	0	0.280085	0.403647	0.513637	0	0.472073	0	0.188189	0.732486	0.250719	0.352895	0	0	0.380437	0.349841	0.178021	0.159306	0.378415	0.125369	0	0.267551	0.473666	0.376932	0	0.503229	0.510936	0.248024	0.402362	0.329127	0.826793	0.541086	0.277974	0.436997	0.366431	0.871894	0.689941
2513020848	2325001	2335000	0.141543	0	0	0.224529	0.174704	0	0.182518	0	0.188189	0.497885	0.140621	0.119408	0	0	0.270736	0.210242	0.178021	0	0.238726	0	0	0	0.204484	0.376932	0	0.503229	0.510936	0.3525	0.472777	0.620233	0.568798	0.238688	0.378635	0.50019	0.636301	0.871894	0.689941
2513020848	2330001	2340000	0	0	0	0	0	0	0	0	0	0.20332	0	0	0	0	0.270736	0.210242	0.178021	0	0.238726	0	0	0	0.204484	0.241282	0	0.247115	0.252668	0.331775	0.40496	0.738182	0.796791	0.539972	0.357992	0.438751	0.747622	0.871894	0.689941
2513020848	2335001	2345000	0	0	0	0.121035	0	0	0	0	0	0	0	0	0	0	0	0.180473	0.101365	0	0	0	0	0.176232	0.190114	0	0	0	0	0.265545	0.391231	0.338907	0.79395	0.627943	0.291022	0.436639	0.371765	0.871894	0.689941
2513020848	2340001	2350000	0	0	0	0.121035	0	0	0	0	0	0	0	0	0	0	0	0.180473	0.101365	0	0	0	0	0.176232	0.190114	0	0	0	0	0.240887	0.388876	0.314139	0.81255	0.624067	0.275824	0.436639	0.366431	0.871894	0.689941
2513020848	2345001	2355000	0	0	0	0.121035	0	0	0	0	0	0	0	0	0	0	0	0.180473	0.101365	0	0	0	0	0.176232	0.190114	0	0	0	0	0.238424	0.388674	0.311639	0.814364	0.623674	0.275824	0.436639	0.366431	0.871894	0.689941
2513020848	2350001	2360000	0	0	0	0	0	0	0	0	0	0	0	0	0	0	0	0	0	0	0	0	0	0	0	0	0	0	0	0.236051	0.388488	0.309227	0.816099	0.623295	0.275824	0.436639	0.366431	0.871894	0.689941
2513020848	2355001	2365000	0.187689	0	0	0	0	0	0	0	0	0.22549	0	0	0.204879	0	0	0	0	0	0.168196	0	0.138437	0.137692	0	0	0	0	0	0.237226	0.389677	0.311937	0.815813	0.624381	0.275824	0.436639	0.366431	0.871894	0.689941
2513020848	2360001	2370000	0.187689	0	0	0	0	0	0	0	0	0.22549	0	0	0.204879	0	0	0	0	0	0.168196	0	0.138437	0.137692	0	0	0	0	0	0.237276	0.389727	0.312052	0.8158	0.624426	0.275824	0.436639	0.366431	0.871894	0.689941
2513020848	2365001	2375000	1.90062	0.0965865	0.108315	1.09049	0.984372	1.04935	1.52931	0	0.926233	0.809134	1.98363	1.31852	1.70289	1.45194	2.2667	1.2036	2.36509	3.30183	1.88605	3.17633	1.84941	1.86343	2.52286	0.98545	1.52719	0.905717	0	0.183687	0.381423	0.426353	0.763731	0.704436	0.275824	0.436639	0.44705	0.871894	0.738632
2513020848	2370001	2380000	1.71293	0.0965865	0.108315	1.09049	0.984372	1.04935	1.52931	0	0.926233	0.583644	1.98363	1.31852	1.49801	1.45194	2.2667	1.2036	7.16148	3.6493	1.71786	3.92095	1.71098	2.29957	2.73093	0.98545	1.52719	0.905717	0	0.171985	0.366529	0.567155	0.685553	0.767696	0.275824	0.436639	0.584878	0.871894	0.794445
2513020848	2375001	2385000	1.71293	0.0965865	0.455975	1.09049	1.16698	1.04935	1.52931	0	0.926233	0.583644	1.98363	1.31852	1.49801	1.56268	2.47119	1.2036	15.6399	3.85844	1.71786	4.52827	1.71098	2.29957	3.13559	0.98545	1.52719	0.905717	0	0.248856	0.325081	0.522201	0.367059	0.95385	0.278381	0.436639	0.539926	0.871894	0.961131
2513020848	2380001	2390000	0	0	0.347659	0.226257	0.182609	0	0	0	0	0	0	0	0	0.110739	0.204492	0	14.5436	0.556614	0	1.35194	0.0960783	0.695811	0.823828	0	0	0	0	0.981453	0.219058	0.372727	0.521096	0.952934	0.98228	0.436639	0.39856	0.871894	0.961024
2513020848	2385001	2395000	0	0.151843	0.493889	0.226257	0.352784	0	0.115769	0	0	0.181208	0	0.200915	0	0.110739	0.351714	0	11.8548	0.346209	0.176646	0.757091	0.0960783	0.274964	0.959386	0	0	0	0	0.96078	0.299972	0.407535	0.488651	0.981454	0.964026	0.436639	0.430357	0.871894	0.98477
2513020848	2390001	2400000	0	0.151843	0.14623	0.331894	0.170175	0	0.115769	0	0	0.181208	0	0.200915	0	0	0.147222	0	7.09057	0.13707	0.176646	0.14977	0.0960783	0.274964	0.554729	0	0	0	0	0.890929	0.36642	0.401514	0.52482	0.970563	0.899255	0.436639	0.425512	0.871894	0.976316
2513020848	2395001	2405000	0	0.151843	0.14623	0.105637	0.170175	0	0.115769	0	0	0.181208	0	0.200915	0	0	0.147222	0	12.2487	0.13707	0.176646	0.14977	0	0.152987	0.34363	0	0	0	0	0.810866	0.395942	0.403043	0.576666	0.925208	0.821235	0.436639	0.426752	0.871894	0.933855
2513020848	2400001	2410000	0.298465	0	0	0.105637	0	0	0	0	0	0.10282	0	0	0	0.789692	0.327192	0	16.1017	0.957565	0.461383	1.28778	0	1.01922	0.455928	0	0	0	0	0.998729	0.0989768	0.266997	0.498974	0.854521	0.998729	0.436639	0.366431	0.871894	0.87214
2513020848	2405001	2415000	0.298465	0	0	0.0993063	0	0	0	0	0	0.10282	0	0	0	0.789692	0.327192	0	13.3403	0.957565	0.576915	1.28778	0	1.01922	0.455928	0	0	0	0	0.944262	0.203325	0.182838	0.505584	0.78764	0.949859	0.436639	0.366431	0.871894	0.812253
2513020848	2410001	2420000	0.298465	0	0	0.0993063	0	0	0	0	0	0.10282	0	0	0	0.789692	0.327192	0	6.91348	0.957565	0.683588	1.28778	0	1.01922	0.455928	0	0	0	0	0.216703	0.308553	0.774325	0.541949	0.806454	0.275824	0.436639	0.782892	0.871894	0.827362
2513020848	2415001	2425000	0	0	0	0.0993063	0	0	0	0	0	0	0	0	0	0	0	0	0.952808	0	0.222205	0	0	0	0	0	0	0	0	0.241045	0.387636	0.324379	0.800452	0.632868	0.275824	0.436639	0.366431	0.871894	0.689941
2513020848	2420001	2430000	0	0	0	0	0	0	0	0	0	0	0	0	0	0	0	0	0	0	0.106673	0	0	0	0	0	0	0	0	0.236185	0.388064	0.310104	0.815522	0.623776	0.275824	0.436639	0.366431	0.871894	0.689941
2513020848	2425001	2435000	0	0	0	0.121513	0.124044	0	0	0	0	0	0	0	0	0	0	0	0.131948	0	0	0	0	0	0	0	0	0	0	0.235913	0.388699	0.30836	0.814492	0.6228	0.275824	0.436639	0.366431	0.871894	0.689941
2513020848	2430001	2440000	0	0	0	0.121513	0.124044	0	0	0	0	0	0	0	0	0	0	0	0.131948	0	0	0	0	0	0	0	0	0	0	0.235925	0.388681	0.308435	0.81463	0.622843	0.275824	0.436639	0.366431	0.871894	0.689941
2513020848	2435001	2445000	0	0	0	0.121513	0.227635	0	0	0	0	0	0	0	0	0	0	0	0.131948	0	0	0	0	0	0	0	0	0	0	0.235708	0.388702	0.307948	0.814227	0.622591	0.275824	0.436639	0.366431	0.871894	0.689941
2513020848	2440001	2450000	0	0	0	0	0.103592	0	0	0	0	0	0	0	0	0	0	0	0	0	0	0	0	0	0	0	0	0	0	0.235813	0.388488	0.308757	0.815816	0.623058	0.275824	0.436639	0.366431	0.871894	0.689941
2513020848	2445001	2455000	0	0	0	0	0.103592	0	0	0	0	0	0	0	0	0	0	0	0	0	0	0	0	0	0	0	0	0	0	0.235845	0.388488	0.30882	0.815855	0.62309	0.275824	0.436639	0.366431	0.871894	0.689941
2513020848	2450001	2460000	0	0	0	0	0	0	0	0	0	0	0	0	0	0	0	0	0	0	0	0	0	0	0	0	0	0	0	0.236051	0.388488	0.309227	0.816099	0.623295	0.275824	0.436639	0.366431	0.871894	0.689941
2513020848	2455001	2465000	0	0	0	0	0	0	0	0	0	0	0	0	0	0	0	0	0	0	0	0	0	0	0	0	0	0	0	0.236051	0.388488	0.309227	0.816099	0.623295	0.275824	0.436639	0.366431	0.871894	0.689941
2513020848	2460001	2470000	0	0	0	0	0	0	0	0	0	0	0	0	0	0	0	0	0	0	0	0	0	0	0	0	0	0	0	0.236051	0.388488	0.309227	0.816099	0.623295	0.275824	0.436639	0.366431	0.871894	0.689941
2513020848	2465001	2475000	0	0.209492	0	0.205066	0.168576	0	0	0	0	0	0	0	0	0	0	0	0	0	0	0	0	0	0.201713	0	0	0	0	0.237421	0.388181	0.30595	0.813856	0.617879	0.275824	0.436639	0.366431	0.871894	0.689941
2513020848	2470001	2480000	0	0.209492	0	0.205066	0.168576	0	0	0	0	0	0	0	0	0	0	0	0	0	0	0	0	0	0.201713	0	0	0	0	0.237338	0.388199	0.306145	0.81399	0.618202	0.275824	0.436639	0.366431	0.871894	0.689941
2513020848	2475001	2485000	0	0.209492	0	0.205066	0.168576	0	0	0	0	0	0	0	0	0	0	0	0	0	0	0	0	0	0.201713	0	0	0	0	0.237245	0.38822	0.306367	0.814143	0.618571	0.275824	0.436639	0.366431	0.871894	0.689941
2513020848	2480001	2490000	0	0	0	0	0	0	0	0	0	0	0	0	0	0	0	0.118606	0	0.125102	0.112615	0.129809	0	0.12772	0	0	0	0	0	0.234366	0.38773	0.312464	0.814471	0.624894	0.275824	0.436639	0.366431	0.871894	0.689941
2513020848	2485001	2495000	0	0	0	0	0	0	0	0	0	0	0	0	0	0	0	0.118606	0	0.125102	0.112615	0.129809	0	0.12772	0	0	0	0	0	0.233861	0.387503	0.313445	0.813975	0.625376	0.275824	0.436639	0.366431	0.871894	0.689941
2513020848	2490001	2500000	0	0	0	0	0	0	0	0	0	0	0	0	0	0.166773	0	0.118606	0	0.125102	0.112615	0.129809	0	0.12772	0	0	0	0	0	0.231641	0.387036	0.314126	0.811991	0.626884	0.275824	0.436639	0.366431	0.871894	0.689941
2513020848	2495001	2505000	11.2263	11.6107	10.3716	11.1139	11.588	11.7017	11.2235	9.25252	10.2032	9.45424	8.556	10.2354	9.87021	9.2888	9.53385	9.97152	10.3523	9.34745	8.7335	10.0466	8.94098	9.03253	8.71372	6.86275	10.0188	8.61385	9.5105	0.243268	0.397305	0.206665	0.767709	0.57415	0.275848	0.436639	0.366431	0.871894	0.689941
2513020848	2500001	2510000	11.2263	11.6107	10.3716	11.1139	11.6885	11.7017	11.2235	9.25252	10.2032	9.45424	8.556	10.2354	9.87021	9.2888	9.53385	9.97152	10.3523	9.34745	8.7335	10.0466	8.94098	9.03253	8.71372	6.86275	10.0188	8.61385	9.5105	0.241207	0.395026	0.227867	0.779201	0.585451	0.275824	0.436639	0.366431	0.871894	0.689941
2513020848	2505001	2515000	11.2263	11.6107	10.3716	11.1139	11.6885	11.7017	11.2235	9.25252	10.2032	9.45424	8.556	10.2354	9.87021	9.12203	9.53385	9.97152	10.3523	9.34745	8.7335	10.0466	8.94098	9.03253	8.71372	6.86275	10.0188	8.61385	9.5105	0.242471	0.395091	0.230127	0.781993	0.585878	0.275848	0.436639	0.366431	0.871894	0.689941
2513020848	2510001	2520000	0	0	0	0	0.100513	0	0	0	0	0	0	0	0	0	0	0.200673	0	0	0	0.346018	0	0.181744	0.182264	0	0	0.0956215	0	0.235764	0.387912	0.312856	0.815618	0.623575	0.275824	0.436639	0.366431	0.871894	0.689941
2513020848	2515001	2525000	0	0	0	0	0	0	0	0	0	0	0	0	0	0	0	0.200673	0	0	0.735365	1.2494	0	0.181744	0.182264	0	0	0.0956215	0	0.229503	0.383453	0.323442	0.811301	0.62756	0.275824	0.436639	0.366431	0.871894	0.689941
2513020848	2520001	2530000	0	0	0	0	0	0	0	0	0	0	0	0	0	0	0	0.200673	0	0	0.735365	1.2494	0	0.181744	0.182264	0	0	0.0956215	0	0.230314	0.384077	0.321611	0.811923	0.627016	0.275824	0.436639	0.366431	0.871894	0.689941
2513020848	2525001	2535000	0	0.183194	0	0	0	0	0	0	0	0	0.177608	0.155043	0	0.185331	0.186069	0	0.150418	0.144468	0.923085	1.05524	0	0.160034	0	0	0	0.132118	0	0.227219	0.383291	0.320533	0.808903	0.629719	0.275824	0.436639	0.366431	0.871894	0.689941
2513020848	2530001	2540000	0	0.183194	0	0	0	0	0	0	0	0	0.177608	0.155043	0	0.185331	0.186069	0	0.150418	0.144468	0.18772	0.15186	0	0.160034	0	0	0	0.132118	0	0.232851	0.38703	0.312771	0.812807	0.626373	0.275824	0.436639	0.366431	0.871894	0.689941
2513020848	2535001	2545000	0	0.183194	0	0	0	0.114966	0.216245	0	0	0	0.177608	0.155043	0	0.185331	0.186069	0.248364	0.150418	0.24912	0.442203	0.15186	0.116801	0.312141	0	0	0	0.132118	0	0.233948	0.385743	0.314825	0.810365	0.628599	0.275824	0.436639	0.366431	0.871894	0.689941
2513020848	2540001	2550000	0	0	0	0	0.326594	0.377708	0.216245	0	0	0	0	0	0	0	0	0.530887	0	0.104652	0.507815	0.248774	0.116801	0.441228	0	0	0	0.249977	0.234787	0.238807	0.384943	0.321667	0.818675	0.620606	0.275824	0.436639	0.366431	0.871894	0.689941
2513020848	2545001	2555000	0	0	0	0	0.326594	0.377708	0.216245	0	0	0	0	0	0	0	0	0.530887	0	0.104652	0.507815	0.248774	0.116801	0.441228	0	0	0	0.249977	0.234787	0.23933	0.384292	0.32403	0.819152	0.620116	0.275824	0.436639	0.366431	0.871894	0.689941
2513020848	2550001	2560000	0	0	0	0	0.326594	0.262742	0	0	0	0	0	0	0	0	0	0.282523	0	0	0.253333	0.248774	0	0.289121	0	0	0	0.249977	0.234787	0.238192	0.385331	0.32488	0.824521	0.615059	0.275824	0.436639	0.366431	0.871894	0.689941
2513020848	2555001	2565000	0.116532	0	0	0.12387	0.203396	0.120601	0	0	0	0	0	0	0	0	0	0	0.297433	0	0	0	0	0	0	0.45544	0	0.224888	0.275055	0.23521	0.390084	0.311169	0.820202	0.616289	0.275824	0.436639	0.366431	0.871894	0.689941
2513020848	2560001	2570000	0.116532	0	0	0.12387	0.203396	0.120601	0	0	0	0	0	0	0	0	0	0	0.297433	0	0	0	0	0	0	0.45544	0	0.224888	0.275055	0.235361	0.389793	0.310814	0.819469	0.617564	0.275824	0.436639	0.366431	0.871894	0.689941
2513020848	2565001	2575000	0.116532	0	0	0.12387	0.203396	0.120601	0	0	0	0	0	0	0	0	0	0	0.297433	0	0	0	0	0	0	0.45544	0	0.224888	0.275055	0.23532	0.389871	0.31091	0.819666	0.617221	0.275824	0.436639	0.366431	0.871894	0.689941
2513020848	2570001	2580000	0	0	0	0	0	0	0	0	0	0	0	0	0	0	0	0	0	0	0	0	0	0	0	0	0	0	0	0.236051	0.388488	0.309227	0.816099	0.623295	0.275824	0.436639	0.366431	0.871894	0.689941
2513020848	2575001	2585000	0	0	0	0	0	0	0	0	0	0	0.127273	0	0	0	0	0	0	0	0	0	0	0	0	0	0	0	0	0.235882	0.387751	0.308347	0.816238	0.623779	0.275824	0.436639	0.366431	0.871894	0.689941
2513020848	2580001	2590000	0	0	0	0.126224	0	0	0.120044	0	0	0	0.127273	0	0	0	0	0	0.142226	0	0	0	0.136501	0	0	0.125434	0	0.131338	0.133117	0.237408	0.386908	0.310823	0.820951	0.619527	0.275824	0.436639	0.366431	0.871894	0.689941
2513020848	2585001	2595000	0.563986	0.417733	0.641328	0.342073	0.3801	0.38706	0.556815	0.332625	0.354007	0.512925	0.583868	0.452222	0.424257	0.386419	0.383933	0.598874	0.52966	0.418217	0.42125	0.546409	0.605365	0.448092	0.484294	0.577787	0.297402	0.669365	0.610572	0.236198	0.388619	0.311835	0.81938	0.613062	0.275824	0.436639	0.366431	0.871894	0.689941
2513020848	2590001	2600000	0.563986	0.417733	0.641328	0.342073	0.3801	0.38706	0.556815	0.332625	0.354007	0.512925	0.456595	0.452222	0.424257	0.386419	0.383933	0.598874	0.52966	0.418217	0.42125	0.546409	0.605365	0.448092	0.484294	0.577787	0.297402	0.669365	0.610572	0.236331	0.38935	0.312054	0.818398	0.615303	0.275824	0.436639	0.366431	0.871894	0.689941
2513020848	2595001	2605000	0.563986	0.417733	0.782142	0.21585	0.554221	0.38706	0.43677	0.332625	0.354007	0.709463	0.682552	0.452222	0.624966	0.563372	0.383933	0.780251	0.554815	0.579989	0.615141	0.683124	0.621367	0.605277	0.633335	0.452353	0.297402	0.538027	0.477455	0.234668	0.389227	0.311991	0.812827	0.624782	0.275824	0.436639	0.366431	0.871894	0.689941
2513020848	2600001	2610000	0	0	0.140814	0	0.174121	0.205241	0	0	0	0.196538	0.225957	0	0.200709	0.176953	0	0.181377	0.167382	0.161772	0.193891	0.399535	0.152504	0.157185	0.149041	0	0	0	0	0.233885	0.387483	0.314546	0.812968	0.627547	0.275824	0.436639	0.366431	0.871894	0.689941
2513020848	2605001	2615000	0	0	0.140814	0	0.174121	0.205241	0	0	0	0.196538	0.225957	0	0.200709	0.176953	0	0.181377	0.167382	0.161772	0.193891	0.524108	0.152504	0.157185	0.149041	0	0	0	0	0.233083	0.387192	0.315253	0.812666	0.627861	0.275824	0.436639	0.366431	0.871894	0.689941
2513020848	2610001	2620000	0	0	0	0	0	0.205241	0	0	0	0	0	0	0	0	0	0	0	0	0	0.387392	0	0	0	0	0	0	0	0.23411	0.387169	0.312395	0.815872	0.622646	0.275824	0.436639	0.366431	0.871894	0.689941
2513020848	2615001	2625000	0	0	0	0	0	0	0	0	0	0	0	0	0	0	0	0	0	0	0	0.124572	0	0	0	0	0	0	0	0.235419	0.388267	0.309652	0.815947	0.623432	0.275824	0.436639	0.366431	0.871894	0.689941
2513020848	2620001	2630000	0	0	0	0	0	0	0	0	0	0	0	0	0	0	0	0	0	0	0	0	0	0	0	0	0	0	0	0.236051	0.388488	0.309227	0.816099	0.623295	0.275824	0.436639	0.366431	0.871894	0.689941
2513020848	2625001	2635000	0	0	0	0	0	0	0	0	0	0	0	0	0	0	0	0	0	0	0	0	0	0	0	0	0	0	0	0.236051	0.388488	0.309227	0.816099	0.623295	0.275824	0.436639	0.366431	0.871894	0.689941
2513020848	2630001	2640000	0	0	0	0	0	0	0	0	0	0	0	0	0	0	0	0	0	0	0	0	0	0	0	0	0	0	0	0.236051	0.388488	0.309227	0.816099	0.623295	0.275824	0.436639	0.366431	0.871894	0.689941
2513020848	2635001	2645000	0.238897	0	0	0	0	0	0	0	0	0	0	0	0	0	0	0	0	0	0	0	0	0	0	0	0	0	0	0.234027	0.387816	0.311654	0.813855	0.61922	0.275824	0.436639	0.366431	0.871894	0.689941
2513020848	2640001	2650000	0.238897	0	0	0	0	0	0	0	0	0	0	0	0	0	0	0	0	0	0	0	0	0	0	0	0	0	0	0.234163	0.387861	0.311489	0.814007	0.619494	0.275824	0.436639	0.366431	0.871894	0.689941
2513020848	2645001	2655000	0.238897	0	0	0.371147	0.336858	0	0	0	0	0	0	0	0	0	0	0	0	0	0.406987	0	0	0	0	0.293743	0	0	0.277408	0.233779	0.388633	0.311284	0.81694	0.61389	0.275824	0.436639	0.366431	0.871894	0.689941
2513020848	2650001	2660000	0	0	0.102927	0.371147	0.336858	0	0	0	0	0	0	0	0	0	0.114102	0	0.129492	0	0.406987	0.121731	0	0.127002	0	0.293743	0	0	0.277408	0.235265	0.387768	0.310665	0.816355	0.618352	0.275824	0.436639	0.366431	0.871894	0.689941
2513020848	2655001	2665000	0	0.318177	0.400127	0.688774	0.624298	0	0.30365	0	0	0	0	0	0	0	0.336671	0	0.420803	0.243032	0.635257	0.121731	0	0.127002	0	0.293743	0	0	0.277408	0.233542	0.384643	0.311118	0.807055	0.612298	0.275824	0.436639	0.366431	0.871894	0.689941
2513020848	2660001	2670000	0	0.318177	0.400127	0.317627	0.28744	0	0.30365	0	0	0	0	0	0	0	0.336671	0	0.420803	0.243032	0.333499	0.219353	0.100985	0.232147	0	0	0	0	0	0.234287	0.382575	0.312827	0.803554	0.618017	0.275824	0.436639	0.366431	0.871894	0.689941
2513020848	2665001	2675000	0.149965	0.318177	0.445566	0.435924	0.28744	0	0.30365	0	0	0	0	0	0	0	0.222569	0	0.291311	0.243032	0.333499	0.0976223	0.100985	0.105144	0	0	0	0	0	0.233377	0.383871	0.308753	0.803385	0.613573	0.275824	0.436639	0.366431	0.871894	0.689941
2513020848	2670001	2680000	0.149965	0	0.148365	0.118297	0	0	0	0	0	0	0	0	0	0	0	0	0	0	0.105229	0.0976223	0.100985	0.105144	0	0	0	0	0	0.235276	0.387313	0.308519	0.813703	0.62012	0.275824	0.436639	0.366431	0.871894	0.689941
2513020848	2675001	2685000	0.149965	0	0.148365	0.118297	0	0	0	0	0	0	0	0	0	0	0	0	0	0	0	0	0	0.127561	0	0	0	0	0	0.235419	0.387792	0.307401	0.814043	0.619586	0.275824	0.436639	0.366431	0.871894	0.689941
2513020848	2680001	2690000	0	0	0	0	0	0	0	0	0	0	0	0	0	0	0	0	0	0	0	0	0	0.127561	0	0	0	0	0	0.236463	0.387905	0.309751	0.816229	0.623225	0.275824	0.436639	0.366431	0.871894	0.689941
2513020848	2685001	2695000	0.143944	0	0.186601	0	0	0.140659	0	0	0	0	0	0	0	0	0	0.320939	0	0	0.103905	0.0967088	0	0.127561	0.134897	0	0	0	0	0.236968	0.388767	0.311796	0.810923	0.621044	0.275824	0.436639	0.366431	0.871894	0.689941
2513020848	2690001	2700000	0.143944	0	0.186601	0	0	0.140659	0	0	0	0	0	0	0	0	0	0.320939	0	0	0.103905	0.0967088	0	0	0.134897	0	0	0	0	0.236392	0.389234	0.31075	0.811949	0.621603	0.275824	0.436639	0.366431	0.871894	0.689941
2513020848	2695001	2705000	0.143944	0	0.186601	0	0	0.140659	0	0	0	0	0	0	0	0	0	0.320939	0	0	0.103905	0.0967088	0	0	0.134897	0	0	0	0	0.236372	0.389192	0.310664	0.812182	0.621697	0.275824	0.436639	0.366431	0.871894	0.689941
2513020848	2700001	2710000	0	0	0	0	0	0	0	0	0	0	0	0	0	0	0	0	0	0.161431	0.23051	0.208647	0	0	0	0	0	0	0	0.232692	0.38695	0.312274	0.814323	0.62495	0.275824	0.436639	0.366431	0.871894	0.689941
2513020848	2705001	2715000	0	0	0	0	0	0	0	0	0	0	0	0	0	0.131637	0	0	0	0.161431	0.23051	0.208647	0	0	0	0	0	0	0	0.228421	0.385519	0.315062	0.811172	0.627552	0.275824	0.436639	0.366431	0.871894	0.689941
2513020848	2710001	2720000	0	0	0	0	0.261259	0	0	0	0	0.261278	0	0	0	0.131637	0	0	0	0.161431	0.483329	0.208647	0.296373	0.271708	0.292407	0	0	0	0	0.23398	0.379141	0.319671	0.808243	0.625005	0.275824	0.436639	0.366431	0.871894	0.689941
2513020848	2715001	2725000	0	0.197845	0	0.247724	0.468384	0	0	0	0	0.261278	0	0	0	0.131637	0.194086	0	0	0	0.252819	0	0.529602	0.537526	0.292407	0	0	0	0	0.24109	0.381175	0.314449	0.808935	0.617177	0.275824	0.436639	0.366431	0.871894	0.689941
2513020848	2720001	2730000	0	0.197845	0	0.247724	0.468384	0	0	0	0	0.261278	0	0	0	0	0.194086	0	0	0	0.252819	0	0.529602	0.537526	0.292407	0	0	0	0	0.241704	0.382731	0.312951	0.811471	0.61721	0.275824	0.436639	0.366431	0.871894	0.689941
2513020848	2725001	2735000	0	0.197845	0	0.247724	0.207125	0	0	0	0	0	0	0	0	0	0.194086	0	0	0	0	0	0.233229	0.265819	0	0	0	0	0	0.237935	0.385811	0.311136	0.812561	0.619038	0.275824	0.436639	0.366431	0.871894	0.689941
2513020848	2730001	2740000	0	0	0	0	0	0	0	0	0	0	0	0	0	0	0	0	0	0	0	0	0	0	0	0	0	0	0	0.236051	0.388488	0.309227	0.816099	0.623295	0.275824	0.436639	0.366431	0.871894	0.689941
2513020848	2735001	2745000	0	0	0.292987	0	0.299057	0	0	0	0	0	0	0	0	0	0	0.103358	0	0	0.230163	0.110863	0	0.104151	0	0	0	0	0	0.235707	0.387994	0.309828	0.812246	0.621375	0.275824	0.436639	0.366431	0.871894	0.689941
2513020848	2740001	2750000	0	0	0.292987	0	0.299057	0	0	0	0	0	0	0	0	0	0	0.103358	0	0	0.230163	0.110863	0	0.104151	0	0	0	0	0	0.235663	0.387929	0.309909	0.811736	0.621124	0.275824	0.436639	0.366431	0.871894	0.689941
[truncated: 657 more rows]

## Sheet: TajimaD
			Transfer 12													Transfer 20														Uncorrected p-values					FDR corrected p-values (q-values)
[truncated: 1,208 more rows]
